# Supplementary material for: Further characterization of SA01 and SA02 zircon reference materials for Si and Zr isotopic compositions via femtosecond laser ablation MC-ICP-MS
Source: Royal Society of Chemistry journal article supplement (doi:10.1039/d1ja00160d), 2021-01-01
Supplement: d1ja00160d1.xlsx [file d1ja00160d1.xlsx]

## Sheet: SA01_LA
LA-MC-ICP-MS Si isotopic data for SA01 zircon ( Mud Tank zircon used as Reference material)
Shard	Session	Sample	28Si	29Si	30Si	29/28	30/28	29/28(se)	30/28(se)	d 29/28	d 30/28	To NBS
												d 29/28	d 30/28
Shard 1	1 (2021-01-07)	MudTank 01	19.1178	1.00468	0.689484	0.052552	0.0360651	3.13534e-06	2.43149e-06
		SA01 01	19.7902	1.04005	0.713665	0.0525538	0.0360616	3.13046e-06	2.35924e-06	0.0632242	0.017003	-0.106787	-0.323003
		MudTank 02	19.7961	1.04026	0.713785	0.0525489	0.0360569	2.87642e-06	2.32702e-06
		SA01 02	20.4205	1.07308	0.73631	0.0525489	0.0360574	3.15813e-06	2.6237e-06	0.0563634	0.119869	-0.113646	-0.220172
		MudTank 03	19.9328	1.04733	0.718562	0.0525429	0.0360492	2.97129e-06	2.47362e-06
		SA01 03	20.7515	1.09033	0.748137	0.0525422	0.0360522	3.5484e-06	2.32827e-06	0.0127591	0.0710241	-0.157243	-0.269
		MudTank 04	20.0882	1.05544	0.724181	0.0525401	0.03605	3.17503e-06	2.57164e-06
		SA01 04	20.8121	1.09355	0.750361	0.052544	0.0360541	3.2657e-06	2.23734e-06	0.0608233	0.149412	-0.109187	-0.190639
		MudTank 05	20.0731	1.05468	0.723584	0.0525415	0.0360474	3.45269e-06	2.22747e-06
		SA01 05	21.015	1.10423	0.757684	0.0525447	0.0360545	3.37201e-06	2.26757e-06	0.079668	0.16715	-0.0903455	-0.172907
		MudTank 06	20.0693	1.05443	0.72349	0.0525395	0.0360496	2.96534e-06	2.59323e-06
		SA01 06	21.0279	1.10489	0.758129	0.0525442	0.0360534	3.13689e-06	2.56831e-06	0.0814753	0.107416	-0.0885386	-0.232621
		MudTank 07	20.2489	1.06389	0.729967	0.0525403	0.0360496	3.81124e-06	2.56782e-06
		SA01 07	20.9097	1.09863	0.753869	0.0525415	0.0360536	3.08371e-06	2.58688e-06	0.0164662	0.0773018	-0.153537	-0.262724
		MudTank 08	20.0583	1.05388	0.723144	0.0525409	0.036052	3.06131e-06	2.25537e-06
		SA01 08	20.9786	1.1023	0.756402	0.0525441	0.0360559	2.66634e-06	2.17253e-06	0.0387026	0.0869329	-0.131304	-0.253097
		MudTank 09	20.4265	1.07328	0.736451	0.0525433	0.0360535	3.03675e-06	2.55117e-06
		SA01 09	20.7979	1.09292	0.749985	0.0525495	0.0360606	3.61947e-06	2.32782e-06	0.136655	0.152527	-0.0333684	-0.187525
		MudTank 10	20.3661	1.07006	0.734335	0.0525413	0.0360567	3.13851e-06	2.566e-06
		SA01 10	20.7481	1.09026	0.748208	0.0525474	0.0360616	3.21146e-06	2.5076e-06	0.0823653	0.109968	-0.0876487	-0.23007
		MudTank 11	20.353	1.06945	0.733898	0.0525448	0.0360585	3.34838e-06	2.31263e-06
		SA01 11	20.8162	1.09384	0.750737	0.0525474	0.0360651	3.34044e-06	2.3295e-06	0.0240869	0.147243	-0.145917	-0.192807
		MudTank 12	20.4987	1.07716	0.739207	0.0525474	0.036061	3.36541e-06	2.36873e-06
		SA01 12	20.8137	1.09373	0.750647	0.0525487	0.036065	3.16709e-06	2.76549e-06	0.0455236	0.101089	-0.124484	-0.238946
		MudTank 13	20.1737	1.06003	0.727502	0.0525451	0.0360618	3.20411e-06	1.97521e-06
		SA01 13	20.9955	1.10334	0.757273	0.0525511	0.0360684	2.89429e-06	2.15916e-06	0.0878821	0.150652	-0.0821328	-0.1894
		MudTank 14	20.3301	1.0683	0.733183	0.0525477	0.036064	2.86264e-06	2.49339e-06
		SA01 14	21.0995	1.10885	0.761001	0.0525532	0.0360671	3.38454e-06	2.55233e-06	0.0627863	0.0867232	-0.107224	-0.253306
		MudTank 15	20.1801	1.06051	0.727774	0.052552	0.0360639	3.14069e-06	2.38316e-06
		SA01 15	20.9064	1.09885	0.754125	0.0525604	0.0360714	3.00369e-06	2.40739e-06	0.147987	0.177981	-0.022038	-0.16208
		MudTank 16	20.3108	1.0674	0.732527	0.0525532	0.036066	3.41036e-06	2.55125e-06
	2 (2021-01-07)	MudTank 01	19.7412	1.03789	0.712622	0.0525747	0.0360981	2.98314e-06	2.42146e-06
		SA01 01	20.4101	1.07311	0.736874	0.0525776	0.0361035	3.17497e-06	2.30378e-06	0.0702669	0.158707	-0.0997451	-0.181347
		MudTank 02	20.0374	1.05343	0.7233	0.0525731	0.0360974	2.61282e-06	2.38247e-06
		SA01 02	20.3137	1.06805	0.733422	0.0525777	0.0361048	3.54264e-06	2.35571e-06	0.052623	0.181554	-0.117386	-0.158508
		MudTank 03	19.8991	1.04623	0.718341	0.0525766	0.0360991	3.37085e-06	2.61793e-06
		SA01 03	20.5974	1.08299	0.743618	0.0525789	0.0361026	2.90542e-06	2.13167e-06	0.0613458	0.0979162	-0.108665	-0.242117
		MudTank 04	19.2296	1.01099	0.694172	0.0525746	0.0360992	3.54472e-06	2.12026e-06
		SA01 04	20.4946	1.07754	0.739931	0.0525768	0.0361036	2.87445e-06	2.50614e-06	0.0544984	0.153597	-0.115511	-0.186455
		MudTank 05	20.028	1.05294	0.722951	0.0525732	0.036097	2.88174e-06	2.63799e-06
		SA01 05	20.5253	1.07912	0.741055	0.0525751	0.0361044	2.94973e-06	2.18843e-06	0.00977652	0.22627	-0.160225	-0.113807
		MudTank 06	19.8343	1.04281	0.715928	0.052576	0.0360954	3.23359e-06	2.35101e-06
		SA01 06	20.4762	1.07658	0.739192	0.052577	0.0361001	3.12714e-06	2.12176e-06	0.0686275	0.109984	-0.101384	-0.230053
		MudTank 07	19.7522	1.03839	0.712994	0.0525709	0.0360969	2.886e-06	2.46561e-06
		SA01 07	20.6009	1.08305	0.743681	0.0525728	0.0360995	3.15245e-06	2.19167e-06	0.0609309	0.138074	-0.109079	-0.201973
		MudTank 08	19.8454	1.04324	0.716261	0.0525682	0.0360921	2.72262e-06	2.31711e-06
		SA01 08	20.1492	1.05927	0.727289	0.0525714	0.0360951	3.0581e-06	2.70774e-06	0.054465	0.0885507	-0.115544	-0.251479
		MudTank 09	19.9514	1.04882	0.720084	0.0525688	0.0360918	2.96751e-06	2.08081e-06
		SA01 09	20.2322	1.06357	0.730221	0.0525681	0.036092	3.02776e-06	2.41121e-06	-0.0154242	0.0828387	-0.185422	-0.257189
		MudTank 10	19.8065	1.04121	0.714739	0.052569	0.0360861	3.2395e-06	2.18033e-06
		SA01 10	20.526	1.07904	0.740765	0.0525691	0.036089	3.49637e-06	2.20589e-06	0.0402302	0.0616017	-0.129777	-0.278419
		MudTank 11	19.7389	1.03758	0.712326	0.052565	0.0360874	3.18325e-06	2.44754e-06
		SA01 11	20.1655	1.06008	0.727718	0.0525687	0.0360872	3.50436e-06	2.68266e-06	0.0788881	0.0188778	-0.0911253	-0.321129
		MudTank 12	19.3589	1.01758	0.698579	0.052564	0.0360856	3.23224e-06	2.31715e-06
		SA01 12	20.2769	1.0659	0.731793	0.0525673	0.03609	3.63745e-06	2.33933e-06	0.0662951	0.100233	-0.103716	-0.239801
		MudTank 13	19.7657	1.03896	0.713287	0.0525637	0.036087	3.46468e-06	2.55717e-06
		SA01 13	20.1806	1.0608	0.728275	0.0525653	0.0360878	3.22332e-06	2.33552e-06	0.0421048	0.0622064	-0.127902	-0.277815
		MudTank 14	19.6618	1.03347	0.70948	0.0525626	0.0360842	2.73059e-06	2.51481e-06
		SA01 14	20.2942	1.06678	0.732324	0.0525657	0.0360853	3.2065e-06	2.40761e-06	0.0251408	0.0779099	-0.144864	-0.262117
		MudTank 15	19.5051	1.02531	0.703761	0.0525662	0.0360809	2.93771e-06	2.00052e-06
		SA01 15	20.1791	1.06075	0.728167	0.0525665	0.0360852	2.97762e-06	2.47303e-06	-0.00945758	0.111894	-0.179456	-0.228144
		MudTank 16	19.6164	1.0312	0.707791	0.0525679	0.0360815	3.37502e-06	2.07625e-06
		SA01 16	20.1531	1.05942	0.727268	0.0525685	0.0360871	3.34501e-06	2.36942e-06	0.0686265	0.173404	-0.101385	-0.166655
		MudTank 17	19.5236	1.0262	0.704417	0.0525618	0.0360802	3.48661e-06	2.24786e-06
	3 (2021-01-08)	MudTank 01	18.5247	0.973635	0.668416	0.0525587	0.0360824	3.48921e-06	2.34197e-06
		SA01 01	19.3047	1.01477	0.696591	0.0525659	0.036084	3.04057e-06	2.44389e-06	0.121251	0.0390246	-0.0487695	-0.300989
		MudTank 02	19.0743	1.00256	0.688256	0.0525604	0.0360828	3.10626e-06	2.45898e-06
		SA01 02	19.356	1.01741	0.698445	0.0525629	0.0360841	2.6244e-06	2.51637e-06	0.049873	0.0887785	-0.120136	-0.251252
		MudTank 03	19.2186	1.01014	0.693389	0.0525602	0.036079	3.17397e-06	2.38164e-06
		SA01 03	19.305	1.01475	0.696627	0.0525638	0.0360851	3.36261e-06	2.44316e-06	0.0751125	0.17128	-0.0949003	-0.168778
		MudTank 04	18.9539	0.996208	0.683838	0.0525595	0.036079	3.08652e-06	2.32702e-06
		SA01 04	19.3729	1.01826	0.699062	0.0525607	0.0360845	3.12794e-06	2.35458e-06	0.0345693	0.136977	-0.135437	-0.20307
		MudTank 05	19.0979	1.00376	0.689058	0.0525582	0.0360801	3.09531e-06	2.37469e-06
		SA01 05	19.3554	1.01735	0.698416	0.0525614	0.0360836	3.16248e-06	2.82487e-06	0.0185046	0.0852297	-0.151499	-0.254799
		MudTank 06	18.7996	0.988157	0.678311	0.0525626	0.036081	3.35761e-06	2.29197e-06
		SA01 06	19.1968	1.00904	0.692667	0.0525631	0.0360824	3.63247e-06	2.34589e-06	0.052981	0.0840752	-0.117028	-0.255953
		MudTank 07	18.8384	0.99011	0.679645	0.052558	0.0360777	2.91067e-06	2.4305e-06
		SA01 07	19.2866	1.01375	0.695867	0.0525624	0.0360803	3.51439e-06	2.82579e-06	0.0875145	0.0765944	-0.0825004	-0.263432
		MudTank 08	18.9138	0.994064	0.68236	0.0525575	0.0360773	3.08793e-06	2.72964e-06
		SA01 08	19.2526	1.01188	0.694663	0.052558	0.0360814	3.22342e-06	2.6369e-06	0.0489733	0.133036	-0.121035	-0.207009
		MudTank 09	18.9225	0.994434	0.68264	0.0525534	0.0360758	3.29984e-06	2.75651e-06
		SA01 09	19.1885	1.00856	0.692219	0.0525607	0.0360746	3.37504e-06	2.42325e-06	0.101811	-0.0428711	-0.0682066	-0.382857
		MudTank 10	19.0451	1.00096	0.687084	0.0525572	0.0360766	2.95993e-06	2.39758e-06
		SA01 10	19.5888	1.02952	0.706737	0.0525563	0.0360787	3.4747e-06	2.35158e-06	0.0209802	0.118079	-0.149023	-0.221961
		MudTank 11	18.9637	0.996607	0.684064	0.0525531	0.0360722	3.21911e-06	2.34882e-06
		SA01 11	19.0676	1.00212	0.687871	0.052556	0.0360752	3.72027e-06	2.5078e-06	0.030777	0.108201	-0.139228	-0.231835
		MudTank 12	18.8845	0.992491	0.681169	0.0525557	0.0360704	3.16321e-06	2.63256e-06
		SA01 12	19.1704	1.00756	0.691582	0.0525582	0.0360754	3.28871e-06	2.20512e-06	0.0318823	0.0972196	-0.138123	-0.242813
		MudTank 13	18.7724	0.986629	0.677184	0.0525574	0.0360734	3.4514e-06	2.23724e-06
		SA01 13	19.0737	1.0025	0.688116	0.0525589	0.0360766	3.03979e-06	2.58514e-06	0.0361943	0.142747	-0.133812	-0.197302
		MudTank 14	18.8272	0.989499	0.679087	0.0525567	0.0360694	3.08409e-06	2.34855e-06
		SA01 14	19.2091	1.0096	0.692944	0.0525582	0.0360737	3.84246e-06	2.70778e-06	0.0368888	0.0990561	-0.133118	-0.240978
		MudTank 15	18.827	0.98947	0.679106	0.0525559	0.0360708	2.99221e-06	2.60635e-06
		SA01 15	19.0121	0.999228	0.685921	0.0525572	0.0360781	3.78021e-06	2.4064e-06	0.0284812	0.256587	-0.141524	-0.0834999
		MudTank 16	18.8243	0.989322	0.678937	0.0525555	0.036067	3.40608e-06	2.29452e-06
		SA01 16	18.9869	0.99793	0.684919	0.052559	0.0360734	3.29923e-06	2.34919e-06	0.0421187	0.107322	-0.127888	-0.232715
		MudTank 17	18.6926	0.982448	0.674278	0.0525581	0.036072	3.32802e-06	2.00877e-06
Shard 2	4 (2021-01-09)	MudTank 01	21.2539	1.11681	0.76616	0.0525461	0.0360478	3.06157e-06	2.61948e-06
		SA01 01	21.2327	1.11566	0.765356	0.0525444	0.0360459	3.12395e-06	2.25864e-06	-0.0180095	-0.0201208	-0.188006	-0.360114
		MudTank 02	21.6834	1.13935	0.78159	0.0525446	0.0360455	3.15694e-06	2.14368e-06
		SA01 02	21.5944	1.13468	0.778382	0.0525449	0.0360454	3.18417e-06	2.18044e-06	0.0101689	-0.00120777	-0.159833	-0.341207
		MudTank 03	21.6479	1.13747	0.780311	0.0525441	0.0360454	3.15234e-06	2.32584e-06
		SA01 03	21.7422	1.14244	0.783728	0.0525447	0.0360464	3.19846e-06	2.33899e-06	-0.00178501	0.0761918	-0.171785	-0.263834
		MudTank 04	21.7783	1.14436	0.784931	0.0525456	0.0360418	3.3259e-06	2.08881e-06
		SA01 04	21.7582	1.14331	0.784321	0.0525462	0.0360471	3.01892e-06	2.4224e-06	0.023516	0.137364	-0.146488	-0.202683
		MudTank 05	21.6442	1.13728	0.780113	0.0525443	0.0360425	3.37888e-06	2.01495e-06
		SA01 05	21.5121	1.13034	0.775408	0.0525443	0.0360451	3.28809e-06	2.30952e-06	0.00496085	0.0395248	-0.16504	-0.300489
		MudTank 06	21.7034	1.14038	0.782295	0.0525437	0.0360448	2.49478e-06	2.26742e-06
		SA01 06	21.7999	1.14543	0.785723	0.0525429	0.0360425	3.33145e-06	2.30691e-06	-0.00721397	-0.0109172	-0.177213	-0.350914
		MudTank 07	21.8212	1.14655	0.786456	0.0525428	0.036041	3.3427e-06	2.03034e-06
		SA01 07	21.7229	1.14134	0.783015	0.0525408	0.0360456	2.91851e-06	2.26181e-06	-0.0327158	0.126575	-0.20271	-0.213468
		MudTank 08	21.7109	1.14074	0.782486	0.0525422	0.0360411	2.85489e-06	2.18141e-06
		SA01 08	21.7553	1.14309	0.78414	0.0525429	0.0360437	3.22024e-06	2.20805e-06	0.0275789	0.112227	-0.142426	-0.227811
		MudTank 09	21.517	1.13052	0.775437	0.0525407	0.0360382	2.78714e-06	2.40132e-06
		SA01 09	21.9034	1.15084	0.789424	0.0525413	0.0360409	3.01377e-06	2.40735e-06	0.0139211	0.0908817	-0.156081	-0.249149
		MudTank 10	21.7593	1.14324	0.784138	0.0525405	0.036037	3.29157e-06	2.35141e-06
		SA01 10	22.4567	1.17985	0.809396	0.0525387	0.0360426	2.88758e-06	2.24317e-06	0.0117296	0.178981	-0.158272	-0.16108
		MudTank 11	21.6008	1.13482	0.778391	0.0525357	0.0360352	3.2001e-06	2.4475e-06
		SA01 11	22.0168	1.15678	0.793434	0.0525405	0.0360377	3.23787e-06	2.16204e-06	0.06157	-0.0024324	-0.10844	-0.342432
		MudTank 12	21.5164	1.13045	0.775458	0.0525389	0.0360403	2.9488e-06	2.28609e-06
		SA01 12	22.025	1.15717	0.793752	0.0525389	0.0360386	3.39828e-06	2.48453e-06	0.00221155	0.0652961	-0.167789	-0.274726
		MudTank 13	21.3857	1.12358	0.770573	0.0525387	0.0360321	3.31573e-06	2.51081e-06
		SA01 13	21.9153	1.15139	0.78978	0.0525378	0.0360378	3.34159e-06	2.76179e-06	0.00439647	0.116073	-0.165604	-0.223967
		MudTank 14	21.7237	1.14129	0.782819	0.0525364	0.0360352	3.05637e-06	2.41217e-06
		SA01 14	21.9707	1.15425	0.791764	0.0525358	0.0360372	3.0105e-06	2.18514e-06	-0.0127889	0.0855214	-0.182787	-0.254508
		MudTank 15	21.7057	1.14035	0.782123	0.0525365	0.0360329	3.17529e-06	2.17513e-06
		SA01 15	21.9217	1.15173	0.79001	0.0525385	0.0360377	3.49887e-06	2.44551e-06	0.0266377	0.0746492	-0.143367	-0.265376
		MudTank 16	21.5952	1.13456	0.778228	0.0525377	0.036037	2.3396e-06	2.14863e-06
		SA01 16	21.9266	1.15199	0.790164	0.0525382	0.0360366	3.41269e-06	2.27512e-06	0.0247926	0.0113282	-0.145212	-0.328676
		MudTank 17	21.6006	1.13481	0.778386	0.052536	0.0360354	3.02889e-06	2.32006e-06
	5 (2021-01-09)	MudTank 01	21.5039	1.12894	0.77418	0.052499	0.0360016	3.4801e-06	2.5419e-06
		SA01 01	21.9431	1.15205	0.790096	0.0525012	0.0360063	3.62729e-06	2.42994e-06	0.0590343	0.139671	-0.110976	-0.200376
		MudTank 02	22.0101	1.15547	0.792387	0.0524972	0.0360009	3.41892e-06	2.34733e-06
		SA01 02	22.0657	1.15847	0.794426	0.0525008	0.0360028	3.01484e-06	2.48232e-06	0.0976406	0.0815853	-0.072376	-0.258442
		MudTank 03	22.0768	1.15891	0.79474	0.0524943	0.0359988	3.06976e-06	2.37575e-06
		SA01 03	22.3768	1.17479	0.805514	0.0524999	0.0359976	3.01256e-06	2.74821e-06	0.119128	0.0222753	-0.0508922	-0.317732
		MudTank 04	22.2431	1.16761	0.80064	0.0524931	0.0359947	3.0705e-06	2.22406e-06
		SA01 04	22.9743	1.20611	0.826998	0.0524979	0.0359962	3.04257e-06	2.34842e-06	0.0761454	0.084568	-0.0938675	-0.255461
		MudTank 05	21.9343	1.15144	0.789454	0.0524947	0.0359916	3.57773e-06	2.45727e-06
		SA01 05	22.6126	1.18708	0.813927	0.0524964	0.0359942	3.23211e-06	1.98974e-06	0.0243474	0.051099	-0.145657	-0.288918
		MudTank 06	22.4952	1.1809	0.809676	0.0524956	0.0359932	3.24032e-06	2.41405e-06
		SA01 06	22.6806	1.19064	0.816421	0.0524963	0.0359965	3.23213e-06	2.53285e-06	0.0309469	0.144241	-0.139058	-0.195808
		MudTank 07	22.3475	1.17311	0.804276	0.0524937	0.0359894	3.37464e-06	2.0633e-06
		SA01 07	23.083	1.21171	0.830854	0.0524935	0.035994	2.9309e-06	2.3002e-06	0.0111241	0.159913	-0.158878	-0.180141
		MudTank 08	22.4428	1.17808	0.807653	0.0524922	0.0359871	3.50412e-06	2.37349e-06
		SA01 08	22.6748	1.19032	0.816167	0.0524951	0.0359944	3.2656e-06	2.26862e-06	0.0559508	0.163766	-0.114059	-0.17629
		MudTank 09	22.5581	1.18413	0.81187	0.0524922	0.0359899	3.41855e-06	2.80438e-06
		SA01 09	22.745	1.19393	0.818637	0.0524915	0.0359917	3.04975e-06	2.44859e-06	0.00879701	0.0745618	-0.161204	-0.265464
		MudTank 10	22.7205	1.1926	0.817675	0.0524899	0.0359882	3.69028e-06	2.48981e-06
		SA01 10	23.015	1.20818	0.828251	0.0524952	0.0359873	2.95716e-06	2.18874e-06	0.0977214	0.0254773	-0.0722952	-0.314531
		MudTank 11	22.6939	1.19121	0.816632	0.0524903	0.0359846	3.36486e-06	2.07497e-06
		SA01 11	23.4691	1.23191	0.844569	0.0524905	0.0359861	3.0721e-06	2.05566e-06	0.0276257	0.0719379	-0.142379	-0.268087
		MudTank 12	22.7521	1.19421	0.818681	0.0524878	0.0359825	3.37169e-06	2.29071e-06
		SA01 12	24.1564	1.26801	0.86933	0.0524915	0.0359875	2.92963e-06	1.84095e-06	0.0388223	0.13298	-0.131184	-0.207066
		MudTank 13	22.9168	1.20294	0.82462	0.0524912	0.0359829	3.62875e-06	2.5551e-06
		SA01 13	23.5007	1.23356	0.845727	0.0524899	0.0359872	3.06656e-06	2.09727e-06	6.77779e-05	0.149917	-0.169932	-0.190134
		MudTank 14	23.0283	1.20873	0.82858	0.0524887	0.0359807	3.31949e-06	2.82783e-06
		SA01 14	23.4179	1.2292	0.842669	0.0524896	0.0359837	3.20163e-06	2.63301e-06	0.0264769	0.0733211	-0.143528	-0.266704
		MudTank 15	23.6964	1.24377	0.852628	0.0524878	0.0359813	2.8585e-06	1.81837e-06
		SA01 15	24.3153	1.27627	0.874957	0.0524883	0.0359838	2.96591e-06	2.18533e-06	-0.00256662	0.111624	-0.172566	-0.228414
		MudTank 16	23.1889	1.21717	0.834301	0.0524891	0.0359783	3.00985e-06	2.3504e-06
		SA01 16	23.8659	1.25266	0.858777	0.0524875	0.0359833	2.97766e-06	2.29741e-06	0.0183166	0.165224	-0.151686	-0.174832
		MudTank 17	23.8604	1.25229	0.858414	0.0524839	0.0359765	2.87883e-06	2.39901e-06
	6 (2021-01-09)	MudTank 01	23.3021	1.22304	0.838422	0.0524861	0.0359804	3.29497e-06	2.50703e-06
		SA01 01	24.4497	1.28328	0.879731	0.0524859	0.035981	3.64202e-06	2.48422e-06	0.0207504	0.00289202	-0.149253	-0.337109
		MudTank 02	23.7442	1.24618	0.854349	0.0524835	0.0359814	3.07478e-06	2.29301e-06
		SA01 02	23.9043	1.25465	0.860046	0.0524859	0.0359785	3.68943e-06	2.52869e-06	0.0207831	-0.00503099	-0.14922	-0.345029
		MudTank 03	23.2203	1.21875	0.835377	0.0524862	0.035976	2.94142e-06	2.33411e-06
		SA01 03	23.6731	1.24256	0.851811	0.0524883	0.0359821	3.17773e-06	2.38475e-06	0.0670302	0.17958	-0.102981	-0.160481
		MudTank 04	23.0086	1.20757	0.827743	0.0524834	0.0359753	3.28368e-06	2.39492e-06
		SA01 04	23.6423	1.24085	0.850645	0.0524842	0.0359797	3.73548e-06	2.29206e-06	0.0205282	0.132843	-0.149475	-0.207202
		MudTank 05	23.0475	1.2096	0.829125	0.0524828	0.0359746	3.1681e-06	2.25579e-06
		SA01 05	24.6073	1.2914	0.885236	0.0524805	0.0359744	3.10992e-06	2.31969e-06	0.00997551	0.0851869	-0.160026	-0.254842
		MudTank 06	23.1759	1.21621	0.833598	0.0524772	0.0359681	2.81183e-06	2.22069e-06
		SA01 06	24.3019	1.27537	0.87422	0.0524799	0.0359732	3.47075e-06	2.13666e-06	0.0490128	0.139951	-0.120995	-0.200097
		MudTank 07	23.3694	1.22637	0.840558	0.0524775	0.0359683	3.10279e-06	2.05653e-06
		SA01 07	24.4189	1.28151	0.878413	0.0524806	0.0359725	2.9612e-06	2.03665e-06	0.0411366	0.0947428	-0.12887	-0.245289
		MudTank 08	23.4174	1.22894	0.842325	0.0524793	0.0359698	3.08257e-06	2.19642e-06
		SA01 08	23.9466	1.25666	0.861374	0.0524775	0.0359704	3.35334e-06	2.33543e-06	-0.0214998	0.0188214	-0.191496	-0.321185
		MudTank 09	23.1786	1.21637	0.83373	0.052478	0.0359697	3.08365e-06	2.24012e-06
		SA01 09	23.5652	1.23666	0.84766	0.0524781	0.0359706	3.26645e-06	2.57358e-06	0.012902	0.0864209	-0.1571	-0.253609
		MudTank 10	23.5558	1.23613	0.847193	0.0524768	0.0359653	3.09162e-06	2.32917e-06
		SA01 10	24.0332	1.26132	0.864566	0.0524821	0.0359736	3.36453e-06	2.21576e-06	0.109958	0.178564	-0.060061	-0.161497
		MudTank 11	23.4658	1.23139	0.844048	0.0524758	0.0359691	3.47527e-06	2.3715e-06
		SA01 11	23.9343	1.25615	0.860962	0.0524833	0.0359718	2.98724e-06	2.19237e-06	0.0867372	0.0968626	-0.0832776	-0.24317
		MudTank 12	23.4442	1.23039	0.843238	0.0524816	0.0359675	3.65648e-06	2.49116e-06
		SA01 12	24.22	1.27104	0.871235	0.0524787	0.0359716	3.18887e-06	2.59795e-06	-0.0232432	0.111974	-0.193239	-0.228064
		MudTank 13	23.5457	1.23564	0.846888	0.0524782	0.0359676	3.94257e-06	2.31785e-06
		SA01 13	24.16	1.26785	0.869029	0.0524771	0.0359697	3.00646e-06	2.3248e-06	-0.0349562	0.0383991	-0.20495	-0.301614
		MudTank 14	23.84	1.25112	0.857498	0.0524796	0.035969	3.16321e-06	2.02598e-06
		SA01 14	24.5918	1.29062	0.88458	0.0524817	0.0359703	3.33271e-06	2.20984e-06	0.0367612	0.0572063	-0.133245	-0.282813
		MudTank 15	24.327	1.27668	0.874986	0.0524799	0.0359675	3.1418e-06	2.31756e-06
		SA01 15	24.7932	1.30116	0.891846	0.0524802	0.0359712	3.03264e-06	2.17034e-06	0.045582	0.141518	-0.124426	-0.19853
		MudTank 16	23.8492	1.25151	0.857732	0.0524757	0.0359648	3.09637e-06	2.32911e-06
		SA01 16	24.4123	1.28114	0.878029	0.0524789	0.0359665	3.34798e-06	2.25668e-06	0.0421231	0.0594774	-0.127884	-0.280543
		MudTank 17	23.9422	1.25643	0.861058	0.0524777	0.035964	3.31067e-06	1.86921e-06
Shard 3	7 (2021-01-09)	MudTank 01	23.1702	1.21583	0.833216	0.0524738	0.0359605	3.01894e-06	2.14297e-06
		SA01 01	24.1296	1.26619	0.867829	0.0524744	0.0359654	2.53241e-06	2.09369e-06	0.0214868	0.140781	-0.148517	-0.199267
		MudTank 02	23.5717	1.23688	0.847644	0.0524728	0.0359601	3.39186e-06	1.97602e-06
		SA01 02	24.447	1.28285	0.879156	0.0524747	0.0359618	3.12853e-06	2.57901e-06	0.0696863	0.101979	-0.100326	-0.238055
		MudTank 03	23.9359	1.25591	0.860647	0.0524692	0.0359561	3.17502e-06	2.18246e-06
		SA01 03	25.3424	1.32985	0.911383	0.0524749	0.0359627	3.39193e-06	1.97536e-06	0.0907749	0.159654	-0.0792406	-0.1804
		MudTank 04	24.2644	1.27318	0.872496	0.052471	0.0359578	3.36597e-06	2.36002e-06
		SA01 04	24.4549	1.28327	0.879444	0.0524746	0.0359617	3.31303e-06	2.44133e-06	0.0962012	0.12785	-0.0738151	-0.212193
		MudTank 05	23.8908	1.25351	0.859032	0.052468	0.0359564	3.68011e-06	2.55525e-06
		SA01 05	24.4741	1.28416	0.880115	0.0524702	0.035961	3.50632e-06	2.12943e-06	0.0330308	0.146108	-0.136975	-0.193941
		MudTank 06	24.2073	1.27013	0.870378	0.0524689	0.0359551	2.92528e-06	2.4211e-06
		SA01 06	24.051	1.26206	0.864845	0.0524742	0.0359587	3.12483e-06	2.33217e-06	0.118122	0.0987966	-0.0518978	-0.241237
		MudTank 07	24.097	1.2643	0.866417	0.052467	0.0359552	3.17373e-06	2.25454e-06
		SA01 07	24.5992	1.29078	0.884567	0.0524726	0.035959	3.31225e-06	2.40435e-06	0.0882333	0.156601	-0.0817817	-0.183453
		MudTank 08	24.2508	1.27242	0.871859	0.0524689	0.0359516	3.01832e-06	2.53677e-06
		SA01 08	24.6836	1.29518	0.887581	0.0524712	0.0359582	3.27758e-06	1.99996e-06	0.0699067	0.151626	-0.100105	-0.188425
		MudTank 09	23.9027	1.25409	0.859399	0.0524662	0.0359539	2.93948e-06	2.0573e-06
		SA01 09	24.659	1.29383	0.886602	0.0524688	0.0359545	3.35954e-06	2.33466e-06	0.0149657	0.029636	-0.155037	-0.310374
		MudTank 10	24.0973	1.26438	0.866371	0.0524697	0.035953	3.4882e-06	2.246e-06
		SA01 10	24.0832	1.26367	0.865917	0.0524711	0.0359552	2.70979e-06	2.14561e-06	0.0749136	0.0866156	-0.0950992	-0.253414
		MudTank 11	24.0211	1.26026	0.863592	0.0524646	0.0359511	2.91781e-06	2.84367e-06
		SA01 11	24.5997	1.29073	0.884483	0.052469	0.0359549	2.87127e-06	2.40356e-06	0.0361411	0.137895	-0.133865	-0.202152
		MudTank 12	24.2196	1.27079	0.870667	0.0524696	0.0359488	3.22737e-06	2.20758e-06
		SA01 12	25.071	1.31556	0.901457	0.052473	0.0359559	3.27639e-06	2.48949e-06	0.0854351	0.115088	-0.0845795	-0.224951
		MudTank 13	24.922	1.30759	0.896072	0.0524674	0.0359549	3.00068e-06	2.72547e-06
		SA01 13	25.3646	1.33096	0.912132	0.052473	0.0359607	3.4285e-06	2.16469e-06	0.0981564	0.157592	-0.0718603	-0.182462
		MudTank 14	24.2605	1.27291	0.872298	0.0524683	0.0359553	3.56967e-06	2.01188e-06
		SA01 14	24.6297	1.29237	0.885625	0.0524717	0.0359574	2.87691e-06	2.14389e-06	0.0494953	0.0558747	-0.120513	-0.284144
		MudTank 15	25.2162	1.3231	0.906666	0.0524699	0.0359555	3.76655e-06	2.33886e-06
		SA01 15	25.5431	1.34028	0.918511	0.0524709	0.0359591	3.44935e-06	1.99681e-06	0.027024	0.102034	-0.142981	-0.238001
		MudTank 16	25.2223	1.32339	0.906884	0.052469	0.0359554	2.91725e-06	2.46741e-06
		SA01 16	25.4258	1.3342	0.914246	0.052474	0.0359575	3.54866e-06	2.2775e-06	0.095739	0.101959	-0.0742773	-0.238075
		MudTank 17	24.5632	1.28881	0.883106	0.0524689	0.0359523	3.28484e-06	2.15054e-06
	8 (2021-01-09)	MudTank 01	23.8858	1.25331	0.858738	0.0524711	0.0359517	2.98635e-06	2.4776e-06
		SA01 01	25.0659	1.31526	0.901378	0.0524715	0.0359601	3.35202e-06	2.49623e-06	0.0204761	0.214405	-0.149527	-0.125668
		MudTank 02	24.5496	1.28812	0.882636	0.0524698	0.0359531	3.18779e-06	2.04218e-06
		SA01 02	25.0282	1.31325	0.899932	0.0524706	0.0359566	3.46127e-06	2.28076e-06	0.0407593	0.104659	-0.129248	-0.235377
		MudTank 03	23.9306	1.25557	0.860368	0.0524672	0.0359526	2.92999e-06	2.5124e-06
		SA01 03	25.2794	1.32646	0.908931	0.0524718	0.0359553	3.33191e-06	1.81082e-06	0.0555965	0.0731646	-0.114413	-0.26686
		MudTank 04	24.3255	1.27637	0.874574	0.0524706	0.0359527	2.87359e-06	2.28214e-06
		SA01 04	25.3255	1.32885	0.910575	0.0524706	0.0359548	3.51115e-06	1.9402e-06	0.0112657	0.098121	-0.158736	-0.241912
		MudTank 05	24.0954	1.26428	0.866232	0.0524695	0.0359499	3.57578e-06	2.92963e-06
		SA01 05	25.8228	1.35491	0.928397	0.0524696	0.0359526	3.12005e-06	2.21411e-06	0.0162097	0.112557	-0.153793	-0.227481
		MudTank 06	24.6056	1.29101	0.884502	0.052468	0.0359471	3.46292e-06	2.11944e-06
		SA01 06	25.128	1.31848	0.903438	0.0524706	0.0359533	3.38554e-06	2.25457e-06	0.0697372	0.126131	-0.100275	-0.213912
		MudTank 07	24.6175	1.29159	0.885014	0.0524659	0.0359505	3.10194e-06	2.06824e-06
		SA01 07	24.8266	1.30272	0.892559	0.0524726	0.0359516	3.5799e-06	2.31847e-06	0.124137	0.0426068	-0.0458841	-0.297408
		MudTank 08	24.5404	1.28755	0.882224	0.0524663	0.0359496	3.19794e-06	2.60024e-06
		SA01 08	25.3744	1.33137	0.912274	0.0524687	0.0359526	3.34849e-06	2.21173e-06	0.0576178	0.11259	-0.112392	-0.227448
		MudTank 09	24.5954	1.2904	0.884142	0.0524651	0.0359474	2.62003e-06	2.28909e-06
		SA01 09	25.4236	1.3339	0.914006	0.0524668	0.0359508	3.27487e-06	2.22707e-06	0.0123946	0.0461836	-0.157608	-0.293832
		MudTank 10	24.8164	1.30206	0.892178	0.0524673	0.0359509	3.63611e-06	2.41416e-06
		SA01 10	25.8825	1.35804	0.930517	0.0524692	0.0359515	3.06915e-06	2.21603e-06	0.0325773	0.0456433	-0.137428	-0.294372
		MudTank 11	24.7471	1.29843	0.889636	0.0524677	0.0359488	3.21039e-06	2.61538e-06
		SA01 11	25.2048	1.32248	0.906093	0.0524689	0.0359489	2.95391e-06	2.41935e-06	0.0577027	0.0268894	-0.112307	-0.31312
		MudTank 12	24.4993	1.28534	0.88068	0.0524641	0.0359471	2.86217e-06	2.00339e-06
		SA01 12	25.5735	1.34188	0.919396	0.0524712	0.035951	3.21327e-06	2.19959e-06	0.168037	0.148249	-0.0019912	-0.191802
		MudTank 13	24.2258	1.2709	0.870784	0.0524606	0.0359442	3.77916e-06	2.81142e-06
		SA01 13	25.4087	1.33311	0.913448	0.0524662	0.0359499	3.3416e-06	2.06235e-06	0.0921909	0.130423	-0.0778247	-0.209621
		MudTank 14	24.5248	1.28663	0.881581	0.0524622	0.0359463	3.49832e-06	2.34847e-06
		SA01 14	25.7288	1.34996	0.924942	0.0524686	0.0359494	2.65575e-06	2.20415e-06	0.0940687	0.103909	-0.0759473	-0.236126
		MudTank 15	24.7348	1.29772	0.889097	0.0524652	0.0359451	3.17513e-06	2.68807e-06
		SA01 15	25.7083	1.34882	0.924175	0.0524663	0.0359483	2.95682e-06	2.05988e-06	0.0247006	0.101127	-0.145304	-0.238907
		MudTank 16	24.5839	1.28979	0.88365	0.0524647	0.0359442	2.88485e-06	2.31891e-06
		SA01 16	25.2753	1.32605	0.908569	0.0524642	0.0359468	3.36653e-06	1.93129e-06	0.0229396	0.0606775	-0.147064	-0.279343
		MudTank 17	24.6007	1.29059	0.884274	0.0524612	0.0359449	3.10772e-06	2.54182e-06
	9 (2021-01-10)	MudTank 01	24.2367	1.27155	0.87118	0.0524637	0.0359444	2.73406e-06	2.5022e-06
		SA01 01	26.0382	1.36614	0.936002	0.0524669	0.0359472	3.0997e-06	2.21562e-06	0.0444568	0.0487085	-0.125551	-0.291308
		MudTank 02	25.2068	1.32249	0.906096	0.0524654	0.0359464	3.32197e-06	2.1268e-06
		SA01 02	25.8647	1.35706	0.92978	0.0524671	0.0359475	3.66712e-06	2.30183e-06	0.0300477	0.0246386	-0.139957	-0.31537
		MudTank 03	25.3601	1.33053	0.911613	0.0524657	0.0359468	3.06311e-06	1.69377e-06
		SA01 03	26.024	1.36543	0.935524	0.0524681	0.0359483	2.9574e-06	2.58702e-06	0.0441564	0.0276407	-0.125851	-0.312369
		MudTank 04	25.1134	1.31761	0.902777	0.0524659	0.0359478	3.12044e-06	1.93323e-06
		SA01 04	25.4633	1.33606	0.915368	0.0524696	0.0359484	3.45181e-06	1.99144e-06	0.0926778	0.0664009	-0.077338	-0.273622
		MudTank 05	25.347	1.3298	0.911079	0.0524636	0.0359441	3.25424e-06	2.28062e-06
		SA01 05	25.5502	1.3405	0.918396	0.0524654	0.0359448	3.14212e-06	2.18183e-06	0.0363969	0.0638833	-0.133609	-0.276138
		MudTank 06	24.8136	1.3018	0.891826	0.0524633	0.0359409	3.30752e-06	2.18466e-06
		SA01 06	25.5295	1.33944	0.917651	0.0524661	0.0359446	3.46446e-06	2.08345e-06	0.055964	0.0974184	-0.114045	-0.242615
		MudTank 07	25.2971	1.32716	0.909215	0.052463	0.0359413	3.25511e-06	2.21897e-06
		SA01 07	25.5767	1.34185	0.919335	0.0524634	0.0359439	3.40329e-06	2.38044e-06	0.0205672	0.104858	-0.149436	-0.235177
		MudTank 08	24.8316	1.30272	0.89243	0.0524617	0.0359389	3.31703e-06	2.31053e-06
		SA01 08	26.0182	1.36504	0.935164	0.0524648	0.0359424	3.47309e-06	2.88771e-06	0.0470205	0.112518	-0.122988	-0.22752
		MudTank 09	25.0763	1.31558	0.901186	0.052463	0.0359377	3.31508e-06	2.1729e-06
		SA01 09	25.8461	1.35603	0.929009	0.0524654	0.0359437	3.42471e-06	2.58151e-06	0.0425114	0.132009	-0.127496	-0.208036
		MudTank 10	25.3559	1.33026	0.911296	0.0524633	0.0359401	3.14082e-06	2.05852e-06
		SA01 10	25.6551	1.34591	0.922128	0.0524615	0.0359432	3.12819e-06	2.0655e-06	0.00641619	0.104195	-0.163585	-0.235841
		MudTank 11	25.2425	1.3242	0.907185	0.052459	0.0359389	3.42305e-06	2.28132e-06
		SA01 11	25.9731	1.36263	0.933571	0.0524632	0.0359436	2.97736e-06	2.05383e-06	0.0491829	0.117401	-0.120825	-0.222639
		MudTank 12	25.3578	1.33033	0.911365	0.0524622	0.03594	3.31993e-06	2.614e-06
		SA01 12	25.4882	1.33718	0.916089	0.0524623	0.0359413	3.13299e-06	2.341e-06	0.00583785	0.0548354	-0.164163	-0.285183
		MudTank 13	25.052	1.31428	0.900339	0.0524617	0.0359387	3.45699e-06	2.51284e-06
		SA01 13	25.7491	1.35082	0.925439	0.0524608	0.0359405	3.03587e-06	2.12327e-06	-0.00882291	0.0855851	-0.178821	-0.254444
		MudTank 14	25.1982	1.32192	0.90553	0.0524607	0.0359362	3.45041e-06	2.36209e-06
		SA01 14	25.9736	1.36266	0.933527	0.0524629	0.0359412	2.96582e-06	1.89204e-06	0.0586297	0.121246	-0.11138	-0.218795
		MudTank 15	25.4101	1.33299	0.913178	0.052459	0.0359375	3.37484e-06	2.19203e-06
		SA01 15	25.9462	1.36116	0.932494	0.0524606	0.0359395	3.54475e-06	2.41132e-06	0.0295284	0.0712961	-0.140477	-0.268728
		MudTank 16	25.0717	1.31525	0.900991	0.0524591	0.0359364	3.53141e-06	2.11743e-06
		SA01 16	25.5677	1.3413	0.918903	0.0524605	0.0359397	3.12976e-06	2.67879e-06	0.0211165	0.0709998	-0.148887	-0.269024
		MudTank 17	25.353	1.33001	0.911135	0.0524596	0.0359379	3.17388e-06	1.93408e-06

## Sheet: SA01_Solution
SN-MC-ICP-MS Si isotopic data for SA01 zircon
Sample	Session	Signal Intensity (V)			Ratios		δ29/28Si	δ30/28Si
		28Si	29Si	30Si	29/28Si	30/28Si
SA01-Solution 1	1	12.1374	0.650797	0.457243	0.0536186	0.0376727	-0.169735	-0.292169
		12.1062	0.649116	0.456067	0.0536182	0.0376722	-0.155417	-0.292995
		12.1239	0.650076	0.456754	0.0536189	0.0376744	-0.139651	-0.239721
	2	12.4532	0.667858	0.46928	0.05363	0.0376836	-0.185459	-0.334065
		12.4514	0.667787	0.469228	0.0536313	0.037685	-0.157728	-0.27083
		11.8257	0.634257	0.445669	0.0536335	0.0376864	-0.108698	-0.215681
SA01-Solution 2	1	11.6165	0.622878	0.437636	0.0536206	0.0376735	-0.116872	-0.284031
		11.6227	0.623224	0.437864	0.0536209	0.0376732	-0.115623	-0.29487
		11.6116	0.622604	0.437445	0.053619	0.0376732	-0.146661	-0.29186
	2	11.399	0.611366	0.429579	0.0536332	0.0376856	-0.12706	-0.231374
		11.9906	0.643058	0.451855	0.0536303	0.0376841	-0.201739	-0.313244
		11.9922	0.643167	0.451903	0.0536323	0.037683	-0.168322	-0.372748
	3	12.6656	0.680541	0.476762	0.0537317	0.0376425	-0.137907	-0.269875
		12.6681	0.680674	0.476845	0.0537314	0.0376411	-0.161518	-0.331177
		12.6637	0.680443	0.476681	0.0537317	0.0376416	-0.150959	-0.294786
AGV	1	12.186	0.65348	0.459177	0.0536261	0.0376808	-0.0805979	-0.168479
		12.2326	0.655948	0.460914	0.0536232	0.0376793	-0.141197	-0.206026
		12.2378	0.656242	0.461104	0.0536242	0.0376789	-0.124033	-0.231972

## Sheet: SA01_Self Bracket
LA-MC-ICP-MS Si isotopic data for SA01 zircon (Self Bracket)
Session	Sample	28Si	29Si	30Si	29/28	30/28	29/28(se)	30/28(se)	δ29Si	δ30Si
1 (2021-01-16)	SA01 01	22	1.1	0.78	0.052428	0.035927	3e-06	2e-06
	SA01 02	22	1.2	0.81	0.052426	0.035917	3e-06	2e-06	-0.06	-0.16
	SA01 03	23	1.2	0.82	0.052429	0.035919	4e-06	3e-06	0.04	0.04
	SA01 04	23	1.2	0.82	0.052429	0.035918	3e-06	2e-06	-0.04	0.02
	SA01 05	23	1.2	0.83	0.052432	0.035915	2e-06	2e-06	0.07	0
	SA01 06	23	1.2	0.82	0.052428	0.035913	3e-06	3e-06	-0.03	-0.03
	SA01 07	23	1.2	0.82	0.052428	0.035912	3e-06	2e-06	0.01	0.04
	SA01 08	23	1.2	0.82	0.052426	0.035909	3e-06	3e-06	-0.07	-0.07
	SA01 09	23	1.2	0.83	0.052432	0.035912	3e-06	2e-06	0.12	0.08
	SA01 10	23	1.2	0.83	0.052426	0.035908	3e-06	2e-06	-0.05	-0.02
	SA01 11	23	1.2	0.83	0.052425	0.035906	3e-06	3e-06	-0.01	-0.03
	SA01 12	23	1.2	0.84	0.052425	0.035907	3e-06	2e-06	0.01	0.04
	SA01 13	23	1.2	0.83	0.052424	0.035904	3e-06	3e-06	-0.02	-0.05
	SA01 14	23	1.2	0.84	0.052425	0.035905	4e-06	2e-06	0.01	0.04
	SA01 15	23	1.2	0.84	0.052425	0.035904	3e-06	2e-06	0.02	-0.02
	SA01 16	23	1.2	0.83	0.052423	0.035904	3e-06	2e-06	-0.03	0.01
	SA01 17	23	1.2	0.84	0.052424	0.035903	3e-06	3e-06	0.03	0.01
	SA01 18	23	1.2	0.84	0.052422	0.035902	3e-06	3e-06	-0.01	-0.02
	SA01 19	24	1.2	0.84	0.052422	0.035902	4e-06	3e-06	0	-0.01
	SA01 20	23	1.2	0.84	0.052421	0.035902	3e-06	2e-06	-0.01	0.03
	SA01 21	23	1.2	0.84	0.052421	0.0359	4e-06	3e-06	0.01	-0.04
	SA01 22	23	1.2	0.84	0.05242	0.035901	3e-06	2e-06	0	0.06
	SA01 23	23	1.2	0.84	0.05242	0.035898	3e-06	2e-06	0	-0.05
	SA01 24	24	1.2	0.85	0.052419	0.035897	3e-06	3e-06	-0.03	-0.03
	SA01 25	23	1.2	0.84	0.052421	0.035899	3e-06	3e-06	0.03	-0.02
	SA01 26	23	1.2	0.84	0.052421	0.035902	4e-06	2e-06	-0.01	0.06
	SA01 27	23	1.2	0.84	0.052422	0.0359	3e-06	3e-06	0	0.04
	SA01 28	24	1.2	0.85	0.052422	0.035896	3e-06	2e-06	0.01	-0.09
	SA01 29	24	1.2	0.85	0.052421	0.035899	4e-06	2e-06	0.02	0.08
	SA01 30	24	1.2	0.85	0.052419	0.035895	3e-06	2e-06	-0.03	-0.06
	SA01 31	24	1.2	0.85	0.052419	0.035896	4e-06	2e-06	0.01	-0.01
	SA01 32	24	1.2	0.85	0.052418	0.035897	4e-06	2e-06	-0.01	0.05
	SA01 33	24	1.2	0.85	0.052418	0.035894	4e-06	2e-06
2 (2021-01-16)	SA01 01	22	1.1	0.78	0.052446	0.035944	3e-06	3e-06
	SA01 02	22	1.1	0.78	0.052451	0.035944	3e-06	3e-06	0.04	-0.04
	SA01 03	22	1.1	0.78	0.052451	0.035947	3e-06	2e-06	0.04	0.08
	SA01 04	22	1.1	0.78	0.052448	0.035943	3e-06	2e-06	0.02	0.03
	SA01 05	22	1.1	0.78	0.052442	0.035938	4e-06	3e-06	-0.06	-0.02
	SA01 06	22	1.1	0.78	0.052443	0.035934	4e-06	3e-06	-0.01	-0.1
	SA01 07	22	1.1	0.78	0.052444	0.035937	4e-06	3e-06	0.05	0.14
	SA01 08	22	1.1	0.78	0.05244	0.03593	3e-06	2e-06	-0.04	-0.05
	SA01 09	22	1.1	0.79	0.052439	0.035927	3e-06	3e-06	0.03	0.01
	SA01 10	22	1.2	0.79	0.052436	0.035924	4e-06	3e-06	-0.04	-0.08
	SA01 11	22	1.2	0.8	0.052436	0.035926	4e-06	3e-06	0.04	0.09
	SA01 12	22	1.2	0.81	0.052433	0.035922	4e-06	3e-06	-0.04	-0.07
	SA01 13	23	1.2	0.81	0.052435	0.035923	4e-06	2e-06	0.02	0.06
	SA01 14	22	1.2	0.8	0.052434	0.03592	3e-06	2e-06	0.02	-0.05
	SA01 15	23	1.2	0.81	0.052432	0.03592	3e-06	2e-06	-0.01	0.09
	SA01 16	23	1.2	0.81	0.05243	0.035914	4e-06	3e-06	0	-0.1
	SA01 17	23	1.2	0.81	0.052429	0.035915	3e-06	2e-06	-0.03	0.04
	SA01 18	23	1.2	0.81	0.05243	0.035913	3e-06	3e-06	0.04	-0.01
	SA01 19	23	1.2	0.82	0.052427	0.035911	3e-06	2e-06	0	0.07
	SA01 20	23	1.2	0.82	0.052424	0.035905	3e-06	3e-06	-0.04	-0.11
	SA01 21	23	1.2	0.82	0.052426	0.035906	4e-06	3e-06	0.02	0.01
	SA01 22	23	1.2	0.82	0.052425	0.035906	3e-06	3e-06	0	-0.01
	SA01 23	23	1.2	0.82	0.052424	0.035908	3e-06	2e-06	0.01	0.06
	SA01 24	23	1.2	0.81	0.052423	0.035904	3e-06	3e-06	0	-0.01
	SA01 25	23	1.2	0.83	0.052421	0.035902	3e-06	3e-06	-0.02	0.04
	SA01 26	23	1.2	0.82	0.052422	0.035898	3e-06	2e-06	-0.01	-0.09
	SA01 27	23	1.2	0.82	0.052423	0.035899	3e-06	2e-06	0.06	0.04
	SA01 28	23	1.2	0.82	0.052418	0.035898	3e-06	2e-06	-0.05	0.03
	SA01 29	23	1.2	0.82	0.052419	0.035895	4e-06	3e-06	0.02	-0.03
	SA01 30	23	1.2	0.82	0.052418	0.035894	3e-06	2e-06	0.02	0.01
	SA01 31	23	1.2	0.82	0.052415	0.035892	3e-06	3e-06	-0.03	-0.04
	SA01 32	23	1.2	0.83	0.052416	0.035892	3e-06	2e-06	0.02	0.01
	SA01 33	23	1.2	0.82	0.052414	0.035892	3e-06	3e-06
3 (2021-01-16)	SA01 01	23	1.19	0.81	0.052417	0.035888	3e-06	2e-06
	SA01 02	23	1.22	0.83	0.052419	0.035891	4e-06	3e-06	0.07	0.11
	SA01 03	23	1.2	0.82	0.052414	0.035886	3e-06	3e-06	-0.05	-0.13
	SA01 04	23	1.2	0.82	0.052414	0.035891	3e-06	3e-06	0	0.11
	SA01 05	23	1.21	0.83	0.052415	0.035887	4e-06	3e-06	0.01	-0.07
	SA01 06	23	1.21	0.83	0.052415	0.035887	4e-06	2e-06	0	0
	SA01 07	23	1.22	0.83	0.052415	0.035888	4e-06	3e-06	0.02	0.04
	SA01 08	23	1.22	0.84	0.052413	0.035886	3e-06	3e-06	-0.03	-0.04
	SA01 09	23	1.22	0.84	0.052415	0.035887	3e-06	2e-06	0.05	0.05
	SA01 10	23	1.23	0.84	0.052411	0.035884	3e-06	3e-06	-0.03	-0.03
	SA01 11	23	1.23	0.84	0.052411	0.035884	3e-06	2e-06	0	0.08
	SA01 12	24	1.24	0.85	0.05241	0.035879	3e-06	3e-06	-0.01	-0.09
	SA01 13	24	1.25	0.85	0.05241	0.03588	4e-06	3e-06	0.02	0.01
	SA01 14	24	1.27	0.87	0.052408	0.03588	3e-06	3e-06	-0.02	0.03
	SA01 15	24	1.24	0.85	0.052409	0.035878	3e-06	2e-06	0.01	-0.06
	SA01 16	24	1.24	0.85	0.052408	0.03588	3e-06	3e-06	-0.01	0.06
	SA01 17	24	1.25	0.86	0.052409	0.035877	3e-06	3e-06	-0.01	-0.03
	SA01 18	24	1.26	0.86	0.052411	0.035877	4e-06	3e-06	0.05	0
	SA01 19	24	1.25	0.86	0.052408	0.035877	3e-06	2e-06	-0.03	0.01
	SA01 20	24	1.26	0.86	0.052407	0.035876	3e-06	2e-06	0.01	0.01
	SA01 21	24	1.25	0.86	0.052406	0.035875	3e-06	2e-06	-0.04	0
	SA01 22	24	1.26	0.86	0.052409	0.035874	3e-06	2e-06	0.06	-0.01
	SA01 23	24	1.26	0.86	0.052405	0.035874	3e-06	2e-06	-0.04	0.01
	SA01 24	24	1.27	0.87	0.052406	0.035873	3e-06	2e-06	0	0.03
	SA01 25	24	1.26	0.86	0.052406	0.035871	4e-06	3e-06	0	-0.02
	SA01 26	24	1.27	0.87	0.052406	0.03587	3e-06	3e-06	0.02	-0.02
	SA01 27	24	1.25	0.86	0.052404	0.03587	3e-06	3e-06	0.01	-0.03
	SA01 28	24	1.26	0.86	0.052401	0.035872	3e-06	3e-06	-0.06	0.08
	SA01 29	25	1.28	0.88	0.052405	0.035869	4e-06	3e-06	0.07	-0.03
	SA01 30	24	1.27	0.87	0.0524	0.035867	3e-06	3e-06	-0.09	-0.05
	SA01 31	24	1.25	0.86	0.052405	0.03587	3e-06	3e-06	0.05	0.01
	SA01 32	24	1.25	0.86	0.052404	0.035871	4e-06	3e-06	0.01	0.06
	SA01 33	24	1.28	0.88	0.052402	0.035869	3e-06	2e-06
4 (2021-01-16)	SA01 01	24	1.24	0.85	0.052402	0.035874	4e-06	3e-06
	SA01 02	24	1.27	0.87	0.052407	0.035874	3e-06	3e-06	0.08	0.01
	SA01 03	25	1.29	0.88	0.052404	0.035873	4e-06	3e-06	-0.05	0.02
	SA01 04	25	1.28	0.88	0.052406	0.03587	4e-06	3e-06	0.07	-0.02
	SA01 05	24	1.27	0.87	0.052401	0.03587	3e-06	2e-06	-0.07	0.01
	SA01 06	24	1.28	0.87	0.052404	0.035869	3e-06	3e-06	0.04	0.04
	SA01 07	25	1.28	0.88	0.052402	0.035865	3e-06	3e-06	-0.03	-0.08
	SA01 08	25	1.3	0.89	0.052402	0.035868	3e-06	2e-06	0.02	0.05
	SA01 09	25	1.29	0.88	0.052401	0.035867	4e-06	3e-06	-0.02	-0.01
	SA01 10	25	1.29	0.88	0.052403	0.035866	3e-06	2e-06	0.01	-0.01
	SA01 11	25	1.29	0.88	0.052402	0.035867	3e-06	3e-06	-0.01	0.02
	SA01 12	25	1.29	0.89	0.052403	0.035866	3e-06	3e-06	0.02	-0.03
	SA01 13	25	1.29	0.89	0.052402	0.035867	3e-06	3e-06	-0.03	0.06
	SA01 14	25	1.29	0.88	0.052404	0.035864	3e-06	3e-06	0.06	-0.06
	SA01 15	25	1.29	0.88	0.052399	0.035865	3e-06	2e-06	-0.07	-0.01
	SA01 16	25	1.29	0.88	0.052401	0.035867	4e-06	3e-06	0.02	0.04
	SA01 17	25	1.29	0.88	0.052401	0.035866	3e-06	3e-06	-0.01	-0.01
	SA01 18	25	1.29	0.88	0.052402	0.035866	3e-06	2e-06	-0.02	-0.04
	SA01 19	25	1.29	0.88	0.052405	0.035868	3e-06	2e-06	0.07	0.06
	SA01 20	25	1.29	0.88	0.052401	0.035866	3e-06	2e-06	-0.04	0.01
	SA01 21	24	1.28	0.88	0.052402	0.035863	3e-06	3e-06	0.03	0
	SA01 22	25	1.29	0.88	0.052399	0.03586	3e-06	2e-06	-0.04	-0.07
	SA01 23	25	1.29	0.88	0.0524	0.035863	3e-06	2e-06	0.01	0.04
	SA01 24	25	1.29	0.88	0.052401	0.035863	3e-06	3e-06	0.02	-0.01
	SA01 25	25	1.29	0.88	0.0524	0.035864	3e-06	2e-06	0	0.02
	SA01 26	25	1.29	0.88	0.052399	0.035863	3e-06	2e-06	0	0.02
	SA01 27	25	1.29	0.88	0.052399	0.035861	3e-06	2e-06	0	-0.07
	SA01 28	25	1.3	0.89	0.052398	0.035863	3e-06	3e-06	0	0.02
	SA01 29	25	1.3	0.89	0.052398	0.035864	4e-06	3e-06	-0.04	0.06
	SA01 30	25	1.31	0.9	0.052401	0.035861	3e-06	2e-06	0.06	-0.05
	SA01 31	25	1.29	0.89	0.052399	0.035861	3e-06	2e-06	-0.03	0
	SA01 32	25	1.29	0.88	0.052399	0.035862	3e-06	3e-06	-0.02	0
	SA01 33	25	1.3	0.89	0.052401	0.035862	3e-06	2e-06
5 (2021-01-16)	SA01 01	24	1.27	0.87	0.0524	0.035863	3e-06	3e-06
	SA01 02	25	1.29	0.88	0.052399	0.035864	3e-06	3e-06	-0.03	0.02
	SA01 03	25	1.29	0.88	0.052401	0.035864	3e-06	2e-06	0.04	0.01
	SA01 04	25	1.31	0.9	0.052399	0.035863	3e-06	2e-06	-0.03	-0.01
	SA01 05	25	1.29	0.89	0.0524	0.035863	3e-06	2e-06	0.02	0.02
	SA01 06	25	1.3	0.89	0.052399	0.035862	3e-06	3e-06	-0.01	-0.02
	SA01 07	25	1.3	0.89	0.052399	0.035861	3e-06	3e-06	0.01	0
	SA01 08	25	1.33	0.91	0.052397	0.03586	4e-06	3e-06	-0.02	-0.01
	SA01 09	25	1.31	0.89	0.052398	0.035861	3e-06	3e-06	-0.01	0.03
	SA01 10	25	1.29	0.89	0.0524	0.035859	3e-06	2e-06	0.01	-0.1
	SA01 11	25	1.29	0.88	0.0524	0.035864	3e-06	2e-06	0.01	0.13
	SA01 12	25	1.29	0.89	0.052399	0.035861	3e-06	2e-06	0.01	-0.05
	SA01 13	25	1.31	0.9	0.052398	0.03586	3e-06	2e-06	-0.03	0
	SA01 14	25	1.32	0.9	0.0524	0.035861	3e-06	3e-06	0	0.01
	SA01 15	25	1.32	0.9	0.052402	0.03586	3e-06	3e-06	0.06	0
	SA01 16	25	1.31	0.9	0.052398	0.03586	4e-06	3e-06	-0.04	-0.04
	SA01 17	25	1.31	0.9	0.052398	0.035862	3e-06	2e-06	-0.01	0.05
	SA01 18	25	1.32	0.9	0.052399	0.035861	4e-06	3e-06	0	-0.02
	SA01 19	25	1.3	0.89	0.0524	0.035861	4e-06	3e-06	0.05	0.03
	SA01 20	25	1.31	0.9	0.052396	0.035859	4e-06	2e-06	-0.03	0.02
	SA01 21	25	1.32	0.9	0.052395	0.035855	3e-06	2e-06	-0.02	-0.11
	SA01 22	25	1.33	0.91	0.052397	0.03586	4e-06	2e-06	0	0.08
	SA01 23	25	1.3	0.89	0.052399	0.035859	3e-06	3e-06	0.03	0.05
	SA01 24	25	1.3	0.89	0.052398	0.035855	3e-06	2e-06	-0.03	-0.07
	SA01 25	25	1.31	0.9	0.0524	0.035856	3e-06	3e-06	0.04	-0.01
	SA01 26	25	1.32	0.9	0.052397	0.035858	4e-06	3e-06	-0.04	0
	SA01 27	25	1.33	0.91	0.052398	0.035859	3e-06	3e-06	0.01	0.04
	SA01 28	25	1.32	0.9	0.052399	0.035858	3e-06	3e-06	0.05	-0.05
	SA01 29	25	1.32	0.9	0.052395	0.03586	3e-06	3e-06	-0.09	0.07
	SA01 30	25	1.31	0.9	0.0524	0.035858	3e-06	3e-06	0.07	-0.03
	SA01 31	25	1.33	0.91	0.052398	0.035857	3e-06	2e-06	-0.02	-0.01
	SA01 32	25	1.33	0.91	0.052398	0.035857	3e-06	3e-06	-0.01	-0.01
	SA01 33	25	1.33	0.91	0.052399	0.035858	3e-06	3e-06
6 (2021-01-18)	SA01 01	24	1.25	0.86	0.0524	0.03586	3e-06	2e-06
	SA01 02	24	1.28	0.88	0.052401	0.035859	3e-06	3e-06	0.07	-0.02
	SA01 03	25	1.29	0.88	0.052395	0.03586	3e-06	3e-06	-0.06	0.09
	SA01 04	25	1.3	0.89	0.052395	0.035854	4e-06	3e-06	-0.01	-0.13
	SA01 05	25	1.3	0.89	0.052396	0.035857	3e-06	2e-06	0	0.08
	SA01 06	25	1.3	0.89	0.052396	0.035854	3e-06	3e-06	-0.03	-0.06
	SA01 07	25	1.31	0.9	0.0524	0.035855	3e-06	3e-06	0.08	0.01
	SA01 08	25	1.3	0.89	0.052395	0.035856	4e-06	3e-06	-0.07	0.05
	SA01 09	25	1.3	0.89	0.052398	0.035853	3e-06	2e-06	0.02	-0.08
	SA01 10	25	1.31	0.9	0.052399	0.035857	4e-06	2e-06	0	0.03
	SA01 11	25	1.3	0.89	0.052399	0.035858	3e-06	2e-06	0.01	0.02
	SA01 12	25	1.31	0.89	0.052399	0.035857	3e-06	2e-06	0.02	-0.01
	SA01 13	25	1.32	0.9	0.052397	0.035856	3e-06	3e-06	-0.02	0.03
	SA01 14	25	1.31	0.9	0.052396	0.035854	4e-06	3e-06	-0.01	-0.06
	SA01 15	25	1.31	0.9	0.052397	0.035856	3e-06	2e-06	0.01	0.05
	SA01 16	26	1.36	0.93	0.052396	0.035854	4e-06	3e-06	-0.03	-0.07
	SA01 17	25	1.32	0.9	0.052399	0.035857	3e-06	3e-06	0.06	0.01
	SA01 18	25	1.32	0.91	0.052395	0.035859	3e-06	3e-06	-0.05	0.06
	SA01 19	25	1.32	0.9	0.052397	0.035857	4e-06	2e-06	0.05	0.06
	SA01 20	25	1.33	0.91	0.052395	0.035851	3e-06	2e-06	-0.06	-0.15
	SA01 21	25	1.3	0.89	0.052398	0.035855	3e-06	3e-06	0.03	0.08
	SA01 22	25	1.31	0.89	0.052399	0.035854	3e-06	3e-06	0.08	0.03
	SA01 23	25	1.33	0.91	0.052391	0.035851	4e-06	3e-06	-0.13	-0.08
	SA01 24	25	1.31	0.9	0.052398	0.035854	3e-06	2e-06	0.06	0.04
	SA01 25	25	1.32	0.9	0.052398	0.035854	3e-06	3e-06	0.01	-0.04
	SA01 26	25	1.31	0.9	0.052397	0.035856	3e-06	2e-06	0.01	0.05
	SA01 27	25	1.31	0.89	0.052394	0.035855	3e-06	2e-06	-0.04	0
	SA01 28	25	1.31	0.9	0.052395	0.035854	3e-06	2e-06	0.01	-0.02
	SA01 29	25	1.31	0.9	0.052396	0.035854	3e-06	3e-06	0.01	0
	SA01 30	25	1.3	0.89	0.052395	0.035854	3e-06	2e-06	-0.05	-0.02
	SA01 31	25	1.31	0.89	0.052399	0.035856	3e-06	2e-06	0.07	0.05
	SA01 32	25	1.3	0.89	0.052394	0.035853	3e-06	3e-06	-0.04	-0.02
	SA01 33	25	1.29	0.89	0.052395	0.035852	3e-06	3e-06	0.01	-0.03
	SA01 34	25	1.3	0.89	0.052394	0.035854	4e-06	3e-06	-0.01	0.02
	SA01 35	25	1.3	0.89	0.052394	0.035854	3e-06	3e-06	-0.02	0.05
	SA01 36	25	1.29	0.89	0.052397	0.035851	4e-06	3e-06	0.06	-0.12
	SA01 37	25	1.29	0.88	0.052393	0.035856	3e-06	3e-06
7 (2021-01-18)	SA01 01	24	1.25	0.85	0.052397	0.035853	3e-06	2e-06
	SA01 02	24	1.28	0.87	0.052397	0.035853	3e-06	2e-06	0.03	-0.03
	SA01 03	25	1.29	0.88	0.052395	0.035855	4e-06	3e-06	0.02	0.04
	SA01 04	24	1.28	0.88	0.052392	0.035855	3e-06	3e-06	-0.04	0.04
	SA01 05	25	1.29	0.88	0.052393	0.035851	3e-06	3e-06	-0.04	-0.08
	SA01 06	24	1.28	0.88	0.052397	0.035854	4e-06	3e-06	0.07	0.06
	SA01 07	24	1.28	0.88	0.052394	0.035852	4e-06	3e-06	-0.05	-0.02
	SA01 08	25	1.29	0.88	0.052397	0.035852	4e-06	3e-06	0.05	-0.01
	SA01 09	25	1.3	0.89	0.052394	0.035852	3e-06	3e-06	-0.06	-0.01
	SA01 10	25	1.29	0.88	0.052398	0.035853	4e-06	3e-06	0.07	0.01
	SA01 11	25	1.29	0.88	0.052394	0.035854	3e-06	3e-06	-0.05	0.04
	SA01 12	25	1.29	0.88	0.052396	0.035851	3e-06	2e-06	0.05	-0.05
	SA01 13	25	1.3	0.89	0.052392	0.035852	3e-06	3e-06	-0.07	0
	SA01 14	25	1.3	0.89	0.052396	0.035853	3e-06	2e-06	0.04	0.02
	SA01 15	25	1.31	0.89	0.052396	0.035853	3e-06	3e-06	0.04	0.02
	SA01 16	25	1.32	0.9	0.052391	0.035852	3e-06	3e-06	-0.09	-0.05
	SA01 17	25	1.3	0.89	0.052397	0.035854	3e-06	3e-06	0.09	0.05
	SA01 18	25	1.31	0.9	0.052393	0.035852	4e-06	2e-06	-0.04	0
	SA01 19	25	1.32	0.9	0.052393	0.035849	4e-06	3e-06	0	-0.05
	SA01 20	25	1.29	0.89	0.052393	0.035851	4e-06	2e-06	0.02	0.06
	SA01 21	26	1.35	0.92	0.05239	0.035848	3e-06	3e-06	-0.07	-0.1
	SA01 22	25	1.32	0.9	0.052395	0.035853	3e-06	3e-06	0.05	0.11
	SA01 23	25	1.32	0.9	0.052394	0.035849	3e-06	3e-06	-0.04	-0.09
	SA01 24	25	1.31	0.9	0.052398	0.035852	4e-06	3e-06	0.04	0.03
	SA01 25	25	1.31	0.9	0.052397	0.035853	3e-06	2e-06	0	0.03
	SA01 26	25	1.3	0.89	0.052396	0.035852	3e-06	2e-06	0.01	0.02
	SA01 27	25	1.31	0.89	0.052395	0.035849	3e-06	3e-06	0	-0.11
	SA01 28	25	1.29	0.89	0.052394	0.035855	4e-06	3e-06	-0.03	0.08
	SA01 29	25	1.31	0.9	0.052396	0.035854	3e-06	3e-06	0.01	-0.02
	SA01 30	25	1.32	0.9	0.052397	0.035854	3e-06	3e-06
8 (2021-01-18)	SA01 01	24	1.28	0.88	0.052391	0.035852	3e-06	3e-06
	SA01 02	25	1.3	0.89	0.052394	0.035851	3e-06	3e-06	0.04	-0.01
	SA01 03	25	1.29	0.88	0.052392	0.035851	4e-06	3e-06	-0.01	0
	SA01 04	25	1.29	0.89	0.052393	0.035851	3e-06	3e-06	0	0.03
	SA01 05	25	1.3	0.89	0.052393	0.035848	3e-06	3e-06	-0.01	-0.08
	SA01 06	25	1.31	0.9	0.052395	0.035852	3e-06	2e-06	0.02	0.08
	SA01 07	25	1.29	0.88	0.052395	0.03585	4e-06	2e-06	0.02	-0.06
	SA01 08	25	1.31	0.9	0.052393	0.035852	4e-06	3e-06	-0.05	0.03
	SA01 09	25	1.31	0.9	0.052397	0.035852	3e-06	3e-06	0.07	-0.03
	SA01 10	25	1.32	0.9	0.052393	0.035854	3e-06	3e-06	-0.08	0.06
	SA01 11	25	1.31	0.9	0.052397	0.035851	4e-06	3e-06	0.07	-0.02
	SA01 12	25	1.32	0.9	0.052394	0.03585	3e-06	2e-06	-0.03	-0.07
	SA01 13	25	1.32	0.9	0.052394	0.035853	4e-06	3e-06	0.01	0.06
	SA01 14	25	1.31	0.9	0.052393	0.035853	3e-06	3e-06	-0.03	0.04
	SA01 15	25	1.31	0.9	0.052395	0.035849	3e-06	2e-06	0.02	-0.08
	SA01 16	25	1.33	0.91	0.052395	0.035851	3e-06	3e-06	0.01	0.01
	SA01 17	25	1.33	0.91	0.052394	0.035851	3e-06	3e-06	-0.04	-0.01
	SA01 18	25	1.33	0.91	0.052396	0.035853	4e-06	2e-06	0.01	0.03
	SA01 19	26	1.34	0.91	0.052398	0.035852	3e-06	3e-06	0.08	0.05
	SA01 20	26	1.34	0.92	0.052392	0.035848	3e-06	3e-06	-0.06	-0.11
	SA01 21	26	1.34	0.92	0.052392	0.035851	3e-06	2e-06	-0.01	0.08
	SA01 22	26	1.34	0.92	0.052394	0.035849	3e-06	2e-06	0.01	-0.06
	SA01 23	25	1.33	0.91	0.052394	0.035851	3e-06	3e-06	0.05	0.07
	SA01 24	26	1.34	0.92	0.052389	0.035847	3e-06	3e-06	-0.1	-0.13
	SA01 25	25	1.33	0.91	0.052394	0.035853	3e-06	3e-06	0.05	0.16
	SA01 26	26	1.36	0.93	0.052395	0.035847	3e-06	3e-06	0	-0.12
	SA01 27	26	1.35	0.92	0.052395	0.03585	3e-06	2e-06	0.01	0.01
	SA01 28	26	1.35	0.93	0.052394	0.035852	3e-06	3e-06	-0.01	0.04
	SA01 29	26	1.34	0.92	0.052394	0.035851	3e-06	3e-06	0	0.03
	SA01 30	26	1.34	0.91	0.052394	0.03585	4e-06	2e-06	-0.01	0.01
	SA01 31	25	1.34	0.91	0.052395	0.035848	2e-06	2e-06

## Sheet: SA02_LA
LA-MC-ICP-MS Si isotopic data for SA02 zircon ( Mud Tank zircon used as Reference material)
Shard	Session	Sample	28Si	29Si	30Si	29/28	30/28	29/28(se)	30/28(se)	d 29/28	d 30/28	To NBS
												d 29/28	d 30/28
Shard 1	1 (2021-01-07)	MudTank 01	18.9929	0.998327	0.685356	0.0525633	0.036085	2.65254e-06	2.35852e-06
		SA02 01	20.324	1.06834	0.733381	0.0525653	0.0360845	2.90471e-06	2.56747e-06	0.00216789	-0.00581672	-0.167832	-0.345815
		MudTank 02	19.7188	1.03656	0.711544	0.0525671	0.0360845	3.29405e-06	2.64628e-06
		SA02 02	20.6273	1.0843	0.744438	0.0525663	0.0360899	3.25995e-06	2.10652e-06	-0.0109582	0.113584	-0.180956	-0.226454
		MudTank 03	19.6003	1.03032	0.707321	0.0525667	0.0360871	3.10602e-06	2.39632e-06
		SA02 03	20.5691	1.08133	0.742377	0.0525702	0.0360917	3.13833e-06	2.1329e-06	0.0425901	0.121045	-0.127417	-0.218996
		MudTank 04	19.6984	1.03553	0.710873	0.0525692	0.0360877	3.64351e-06	2.83302e-06
		SA02 04	20.5707	1.08151	0.742524	0.0525751	0.0360961	3.29736e-06	2.2072e-06	0.111739	0.209982	-0.0582798	-0.13009
		MudTank 05	19.8047	1.04112	0.714744	0.0525693	0.0360894	3.22921e-06	2.28531e-06
		SA02 05	20.9696	1.10243	0.756823	0.0525728	0.0360913	3.19058e-06	2.91123e-06	0.040321	0.0592943	-0.129686	-0.280726
		MudTank 06	19.8309	1.04255	0.715679	0.052572	0.0360889	3.50059e-06	2.84945e-06
		SA02 06	20.3232	1.06841	0.733502	0.0525707	0.036092	3.64472e-06	2.48576e-06	-0.0284084	0.0964689	-0.198404	-0.243564
		MudTank 07	19.7405	1.03781	0.7124	0.0525724	0.0360881	3.28309e-06	2.67155e-06
		SA02 07	20.8122	1.09408	0.751152	0.0525693	0.0360918	2.98388e-06	2.28004e-06	-0.0325682	0.106208	-0.202563	-0.233828
		MudTank 08	20.0861	1.05592	0.724866	0.0525697	0.0360878	3.545e-06	2.38215e-06
		SA02 08	20.4071	1.07285	0.736493	0.0525722	0.0360899	2.89787e-06	2.61171e-06	0.0710056	0.0380694	-0.0990065	-0.301944
		MudTank 09	19.4837	1.02421	0.703158	0.0525673	0.0360893	3.41838e-06	2.52885e-06
		SA02 09	20.3096	1.06762	0.73299	0.0525667	0.0360909	3.29983e-06	2.39906e-06	-0.00825116	0.0832402	-0.17825	-0.256788
		MudTank 10	19.8987	1.04602	0.718078	0.052567	0.0360865	3.35111e-06	2.77995e-06
		SA02 10	20.6288	1.08442	0.744463	0.0525681	0.0360885	3.60792e-06	2.7916e-06	0.0483525	0.0966256	-0.121656	-0.243407
		MudTank 11	20.0784	1.0554	0.724499	0.0525641	0.0360835	3.30931e-06	2.30111e-06
		SA02 11	20.5684	1.08123	0.742305	0.0525673	0.0360895	3.6254e-06	2.49048e-06	0.0349052	0.174705	-0.135101	-0.165354
		MudTank 12	19.9318	1.04775	0.719198	0.0525668	0.0360829	2.98262e-06	2.55717e-06
		SA02 12	21.4176	1.12587	0.772904	0.0525674	0.0360872	2.92944e-06	2.53301e-06	0.0177073	0.147757	-0.152296	-0.192293
		MudTank 13	20.0357	1.0532	0.722907	0.0525661	0.0360809	3.09074e-06	2.46148e-06
		SA02 13	21.3789	1.12381	0.771478	0.0525659	0.0360858	3.471e-06	2.57603e-06	0.0263808	0.189706	-0.143624	-0.150359
		MudTank 14	19.7198	1.03654	0.711439	0.052563	0.0360771	3.18234e-06	2.8489e-06
		SA02 14	21.2567	1.11735	0.766954	0.0525641	0.0360805	3.39659e-06	2.20874e-06	0.00671186	0.0909315	-0.163289	-0.249099
		MudTank 15	20.0673	1.05483	0.723976	0.0525645	0.0360775	2.69391e-06	2.30435e-06
		SA02 15	20.9024	1.09872	0.754164	0.0525638	0.03608	3.08447e-06	2.54538e-06	0.0402858	0.0727245	-0.129721	-0.2673
		MudTank 16	20.4139	1.07294	0.736479	0.0525589	0.0360773	2.95083e-06	2.41812e-06
		SA02 16	20.9035	1.0987	0.754117	0.0525601	0.0360759	3.25202e-06	2.67187e-06	0.00201929	-0.0191043	-0.167981	-0.359098
		MudTank 17	19.7757	1.03943	0.713423	0.0525611	0.0360758	3.20854e-06	2.55645e-06
	2 (2021-01-08)	MudTank 01	19.5118	1.02632	0.705015	0.0526	0.0361326	3.8178e-06	2.23409e-06
		SA02 01	20.6366	1.0856	0.745719	0.0526057	0.0361357	3.56351e-06	2.4591e-06	0.101668	0.135935	-0.0683496	-0.204112
		MudTank 02	20.2039	1.06274	0.72995	0.0526007	0.036129	3.24115e-06	2.18328e-06
		SA02 02	20.9609	1.10252	0.757238	0.0525988	0.036126	3.28356e-06	2.63471e-06	0.00684329	0.00938931	-0.163158	-0.330614
		MudTank 03	20.2671	1.06598	0.732096	0.0525963	0.0361223	2.8908e-06	2.50968e-06
		SA02 03	20.7605	1.09184	0.749904	0.0525922	0.0361214	3.05891e-06	2.90275e-06	-0.0325112	0.044189	-0.202506	-0.295826
		MudTank 04	20.3015	1.06769	0.733239	0.0525915	0.0361173	3.29052e-06	2.75273e-06
		SA02 04	20.7392	1.09071	0.74905	0.0525917	0.0361177	2.98577e-06	2.52956e-06	0.04842	0.0736541	-0.121588	-0.266371
		MudTank 05	20.2323	1.06395	0.730641	0.0525869	0.0361127	3.46679e-06	2.42356e-06
		SA02 05	21.7666	1.14464	0.786025	0.0525866	0.0361115	3.31624e-06	2.56081e-06	0.0151484	0.042565	-0.154854	-0.297449
		MudTank 06	20.2605	1.06539	0.731547	0.0525847	0.0361072	3.26699e-06	2.00613e-06
		SA02 06	20.8072	1.09416	0.751359	0.0525857	0.0361106	2.88909e-06	2.02783e-06	0.0416698	0.119994	-0.128337	-0.220047
		MudTank 07	20.3043	1.06765	0.733092	0.0525823	0.0361053	2.84026e-06	2.35688e-06
		SA02 07	20.9046	1.09928	0.754817	0.0525855	0.0361076	3.24269e-06	2.67908e-06	0.0632313	0.0799609	-0.106779	-0.260066
		MudTank 08	20.199	1.06211	0.729269	0.052582	0.0361041	3.55598e-06	2.48527e-06
		SA02 08	20.5271	1.07933	0.741126	0.0525807	0.0361048	3.41648e-06	2.38061e-06	3.569e-05	0.0599287	-0.169964	-0.280092
		MudTank 09	19.7027	1.03596	0.711289	0.0525795	0.0361012	3.15491e-06	2.08968e-06
		SA02 09	21.0562	1.10713	0.760217	0.0525792	0.0361041	4.29715e-06	2.27024e-06	-0.000151475	0.103882	-0.170151	-0.236153
		MudTank 10	19.8527	1.04384	0.716673	0.052579	0.0360995	3.15439e-06	2.72814e-06
		SA02 10	20.668	1.08674	0.746167	0.0525804	0.0361023	3.02117e-06	2.34164e-06	0.0214025	0.0889687	-0.148601	-0.251062
		MudTank 11	19.9385	1.04836	0.719755	0.0525796	0.0360988	2.85706e-06	2.28012e-06
		SA02 11	20.3105	1.06794	0.733283	0.0525804	0.0361035	3.3633e-06	2.8331e-06	0.0431319	0.114793	-0.126875	-0.225246
		MudTank 12	19.9195	1.0473	0.719094	0.0525766	0.0360999	3.37828e-06	2.44403e-06
		SA02 12	20.6591	1.08626	0.745856	0.0525804	0.0361031	3.39241e-06	2.21392e-06	0.0727836	0.131189	-0.0972288	-0.208856
		MudTank 13	19.9858	1.05078	0.721426	0.0525765	0.0360969	3.30337e-06	2.42239e-06
		SA02 13	20.7362	1.09036	0.748649	0.0525821	0.0361033	3.38552e-06	3.05057e-06	0.100027	0.193349	-0.0699897	-0.146717
		MudTank 14	20.3375	1.06929	0.734097	0.0525772	0.0360957	3.13237e-06	2.18216e-06
		SA02 14	21.2042	1.11494	0.765446	0.0525809	0.0360987	2.70934e-06	2.16142e-06	0.023891	0.0256	-0.146113	-0.314409
		MudTank 15	20.1094	1.0574	0.725947	0.0525821	0.0360999	2.98278e-06	2.01162e-06
		SA02 15	20.8764	1.09765	0.753588	0.0525786	0.0360974	3.05223e-06	2.37709e-06	-0.00738184	-0.0427816	-0.177381	-0.382767
		MudTank 16	20.2769	1.06608	0.731958	0.0525758	0.0360981	3.65602e-06	2.95295e-06
		SA02 16	20.8519	1.09642	0.752798	0.0525814	0.0361021	3.16853e-06	1.79092e-06	0.0902696	0.0807373	-0.0797457	-0.25929
		MudTank 17	19.9498	1.04891	0.720192	0.0525775	0.0361002	3.42325e-06	2.25236e-06
	3 (2021-01-08)	MudTank 01	19.6674	1.03424	0.710254	0.0525862	0.0361132	3.92437e-06	2.36686e-06
		SA02 01	20.0788	1.05587	0.725083	0.0525864	0.0361118	3.52515e-06	2.6119e-06	-0.0227592	-0.00866229	-0.192755	-0.348659
		MudTank 02	19.7606	1.0392	0.713578	0.052589	0.0361109	3.15343e-06	2.34386e-06
		SA02 02	20.2734	1.06619	0.732129	0.0525905	0.0361128	2.72932e-06	2.84759e-06	0.0673446	0.0662535	-0.102667	-0.273769
		MudTank 03	19.8285	1.04268	0.716006	0.0525849	0.0361098	3.18344e-06	2.46671e-06
		SA02 03	20.3942	1.07244	0.73645	0.0525854	0.0361105	3.76444e-06	2.86864e-06	0.0386814	0.0184163	-0.131325	-0.32159
		MudTank 04	19.9456	1.04878	0.720235	0.0525818	0.0361099	3.07007e-06	2.27074e-06
		SA02 04	20.3677	1.07101	0.735446	0.0525837	0.0361085	2.83278e-06	1.97764e-06	0.0241643	0.0176601	-0.14584	-0.322346
		MudTank 05	19.7735	1.03975	0.713937	0.052583	0.0361058	3.2672e-06	2.226e-06
		SA02 05	20.5128	1.07863	0.740653	0.0525829	0.0361068	3.77855e-06	2.45552e-06	0.0112956	0.0461987	-0.158706	-0.293817
		MudTank 06	19.6792	1.03477	0.710508	0.0525816	0.0361044	3.09603e-06	2.47737e-06
		SA02 06	20.5642	1.08134	0.742493	0.0525836	0.0361059	2.32856e-06	2.65771e-06	0.0360495	0.0744433	-0.133957	-0.265582
		MudTank 07	20.0078	1.05205	0.722324	0.0525818	0.036102	2.94465e-06	2.21158e-06
		SA02 07	20.3432	1.06969	0.734501	0.052582	0.0361054	3.63671e-06	2.50459e-06	0.00739517	0.109693	-0.162606	-0.230344
		MudTank 08	19.4096	1.02059	0.700706	0.0525815	0.0361009	3.39816e-06	2.72401e-06
		SA02 08	20.2033	1.06233	0.729505	0.052582	0.0361082	3.50408e-06	2.57917e-06	0.0278114	0.181731	-0.142193	-0.158331
		MudTank 09	19.8178	1.04201	0.71547	0.0525795	0.0361023	2.8596e-06	2.24125e-06
		SA02 09	20.6028	1.08332	0.743853	0.0525809	0.0361042	2.89713e-06	2.24012e-06	0.0177913	0.0747818	-0.152212	-0.265244
		MudTank 10	19.8843	1.04552	0.717839	0.0525803	0.0361008	3.95317e-06	2.21729e-06
		SA02 10	20.1131	1.05751	0.726019	0.0525782	0.0360968	3.03335e-06	2.28689e-06	-0.0146841	-0.0848008	-0.184682	-0.424772
		MudTank 11	19.781	1.04004	0.714072	0.0525776	0.036099	3.41635e-06	2.71258e-06
		SA02 11	20.1968	1.06202	0.729161	0.0525835	0.0361027	3.08764e-06	2.2928e-06	0.0770676	0.133757	-0.0929455	-0.206288
		MudTank 12	19.8022	1.04123	0.714795	0.0525813	0.0360968	3.18894e-06	2.79683e-06
		SA02 12	20.505	1.07813	0.740197	0.0525787	0.0360984	3.46503e-06	2.48716e-06	-0.0375656	0.0342634	-0.207559	-0.305748
		MudTank 13	19.846	1.04351	0.716394	0.0525801	0.0360975	3.62754e-06	2.41295e-06
		SA02 13	20.5379	1.07988	0.741398	0.0525798	0.0360988	3.09815e-06	2.12557e-06	0.0545244	0.0951155	-0.115485	-0.244917
		MudTank 14	19.8856	1.04547	0.717742	0.0525738	0.0360933	3.24805e-06	2.27077e-06
		SA02 14	20.4535	1.07542	0.738279	0.0525787	0.0360954	3.12777e-06	2.22126e-06	0.0969872	0.0140203	-0.0730293	-0.325984
		MudTank 15	19.9303	1.0478	0.719411	0.0525734	0.0360964	2.46497e-06	1.98682e-06
		SA02 15	20.0584	1.05465	0.724022	0.0525789	0.0360956	3.32377e-06	2.1267e-06	0.085188	0.0304982	-0.0848265	-0.309512
		MudTank 16	19.666	1.03395	0.709796	0.0525755	0.0360927	3.35014e-06	2.20053e-06
		SA02 16	20.3062	1.06764	0.732926	0.0525772	0.0360937	3.18597e-06	2.13472e-06	0.0421217	0.00388154	-0.127885	-0.33612
		MudTank 17	19.8511	1.04366	0.716514	0.0525744	0.0360944	3.53459e-06	2.45206e-06
Shard 2	4 (2021-01-08)	MudTank 01	18.5416	0.974808	0.669237	0.0525739	0.0360936	3.59195e-06	2.28255e-06
		SA02 01	19.7616	1.03905	0.713413	0.0525793	0.036101	3.51817e-06	2.76481e-06	0.0818349	0.216225	-0.088179	-0.123849
		MudTank 02	19.1213	1.00532	0.690143	0.0525761	0.0360928	3.14713e-06	2.58077e-06
		SA02 02	19.9483	1.04881	0.720109	0.0525763	0.0360986	3.3311e-06	2.46269e-06	0.0516254	0.186577	-0.118383	-0.153487
		MudTank 03	19.5548	1.02802	0.705757	0.052571	0.0360911	3.23421e-06	2.04668e-06
		SA02 03	20.1277	1.05819	0.726493	0.0525738	0.036094	3.71484e-06	2.45568e-06	0.0208977	0.079971	-0.149106	-0.260056
		MudTank 04	19.3742	1.01859	0.699238	0.0525744	0.0360912	3.10342e-06	2.34927e-06
		SA02 04	20.2735	1.06593	0.731778	0.0525775	0.0360951	3.5107e-06	2.77522e-06	0.0924745	0.103087	-0.0775412	-0.236948
		MudTank 05	19.4633	1.0232	0.70246	0.0525708	0.0360916	3.22373e-06	2.68964e-06
		SA02 05	20.0764	1.05555	0.724657	0.0525766	0.0360949	3.14002e-06	2.2983e-06	0.0662301	0.103699	-0.103781	-0.236337
		MudTank 06	19.4163	1.02083	0.700748	0.0525756	0.0360907	3.06326e-06	2.10618e-06
		SA02 06	20.4767	1.07654	0.739079	0.0525737	0.0360936	3.0824e-06	2.4012e-06	0.0200503	0.115729	-0.149953	-0.22431
		MudTank 07	19.2821	1.01365	0.695855	0.0525697	0.0360881	3.30717e-06	2.80787e-06
		SA02 07	20.2107	1.06257	0.729519	0.0525745	0.0360956	3.5144e-06	2.93086e-06	0.0349654	0.194215	-0.135041	-0.145851
		MudTank 08	19.2705	1.01316	0.695457	0.0525755	0.036089	3.50796e-06	2.69748e-06
		SA02 08	20.1211	1.05785	0.726274	0.0525743	0.0360951	2.81919e-06	2.21323e-06	0.0185863	0.182096	-0.151417	-0.157966
		MudTank 09	19.0677	1.00241	0.68812	0.0525712	0.0360881	2.91216e-06	2.77126e-06
		SA02 09	20.1405	1.0589	0.727004	0.0525751	0.0360966	3.63584e-06	1.96629e-06	0.0627755	0.217586	-0.107235	-0.122488
		MudTank 10	19.2476	1.01189	0.694635	0.0525724	0.0360894	3.18042e-06	2.57188e-06
		SA02 10	19.8926	1.04583	0.718025	0.0525738	0.0360953	3.32867e-06	2.14972e-06	0.0218437	0.179772	-0.14816	-0.160289
		MudTank 11	19.4493	1.02251	0.701894	0.0525729	0.0360883	3.15893e-06	2.5938e-06
		SA02 11	20.3701	1.07093	0.735146	0.0525736	0.0360894	3.18744e-06	2.47704e-06	0.0190231	0.0596225	-0.15098	-0.280398
		MudTank 12	19.3766	1.01868	0.699229	0.0525723	0.0360862	3.3125e-06	2.47772e-06
		SA02 12	20.1452	1.05914	0.72706	0.0525753	0.0360908	3.30552e-06	2.5785e-06	0.0579933	0.105379	-0.112017	-0.234657
		MudTank 13	19.5863	1.0297	0.706828	0.0525722	0.0360879	2.88121e-06	2.18186e-06
		SA02 13	20.372	1.07108	0.735274	0.052576	0.0360921	3.51285e-06	2.30705e-06	0.065359	0.102599	-0.104652	-0.237435
		MudTank 14	19.5018	1.02527	0.703799	0.052573	0.0360889	3.16348e-06	2.18067e-06
		SA02 14	20.3913	1.07211	0.735989	0.0525768	0.0360932	2.93017e-06	2.28347e-06	0.104085	0.174445	-0.0659332	-0.165614
		MudTank 15	19.6046	1.03062	0.707436	0.0525697	0.036085	3.33092e-06	2.11778e-06
		SA02 15	20.2946	1.06696	0.732475	0.0525733	0.036092	4.22809e-06	2.10337e-06	0.0354565	0.168496	-0.13455	-0.171561
		MudTank 16	19.4375	1.0219	0.701442	0.0525732	0.0360869	3.28567e-06	2.12306e-06
		SA02 16	20.4156	1.07329	0.736798	0.0525717	0.0360897	3.51059e-06	2.1579e-06	0.0230492	0.0687592	-0.146955	-0.271264
		MudTank 17	19.2987	1.01449	0.696449	0.0525678	0.0360876	3.52819e-06	2.27179e-06
	5 (2021-01-08)	MudTank 01	19.1258	1.00548	0.690193	0.0525715	0.0360869	3.18586e-06	2.46588e-06
		SA02 01	19.2531	1.01218	0.694795	0.0525722	0.0360875	3.10219e-06	2.32289e-06	0.0496268	0.101871	-0.120382	-0.238164
		MudTank 02	19.5478	1.02758	0.705298	0.0525676	0.0360806	2.77495e-06	2.30129e-06
		SA02 02	19.7881	1.04036	0.714102	0.0525747	0.0360874	3.35505e-06	2.26297e-06	0.129297	0.177146	-0.0407251	-0.162914
		MudTank 03	19.5214	1.0262	0.704359	0.0525681	0.0360813	3.61614e-06	2.3222e-06
		SA02 03	19.73	1.03724	0.711939	0.0525718	0.036084	3.0605e-06	2.6796e-06	0.0457385	0.0372753	-0.124269	-0.302737
		MudTank 04	19.3569	1.01761	0.698479	0.0525707	0.036084	3.39197e-06	2.6059e-06
		SA02 04	19.3318	1.01628	0.697584	0.0525702	0.0360846	3.4431e-06	2.51463e-06	0.0179547	0.0496329	-0.152048	-0.290384
		MudTank 05	19.3548	1.01745	0.698353	0.0525678	0.0360815	3.10438e-06	2.35946e-06
		SA02 05	19.9576	1.04911	0.720133	0.0525667	0.0360829	3.18572e-06	1.96896e-06	-0.0160649	0.0829564	-0.186062	-0.257072
		MudTank 06	19.5687	1.02868	0.706007	0.0525672	0.0360783	3.62286e-06	2.40325e-06
		SA02 06	19.6483	1.03289	0.708956	0.0525687	0.0360822	3.64971e-06	2.24363e-06	0.0171545	0.111422	-0.152848	-0.228616
		MudTank 07	19.4434	1.02211	0.701483	0.0525685	0.0360781	3.55626e-06	2.59366e-06
		SA02 07	19.4557	1.02278	0.702012	0.0525692	0.0360823	3.78865e-06	2.73019e-06	-0.00161445	0.124549	-0.171614	-0.215494
		MudTank 08	19.6526	1.03315	0.709022	0.0525701	0.0360775	3.0045e-06	1.89906e-06
	6 (2021-01-08)	MudTank 01	19.5185	1.02564	0.703764	0.0525471	0.0360563	3.30227e-06	2.1078e-06
		SA02 01	19.5193	1.0257	0.703762	0.0525479	0.0360546	3.44814e-06	2.32989e-06	0.0280973	-0.0138178	-0.141907	-0.353813
		MudTank 02	20.0702	1.0546	0.723609	0.0525457	0.0360539	2.73775e-06	2.44414e-06
		SA02 02	19.7733	1.03903	0.712884	0.0525468	0.0360526	3.75031e-06	2.6042e-06	0.0562246	0.0101072	-0.113785	-0.329896
		MudTank 03	19.9719	1.04937	0.72	0.0525421	0.0360506	3.14106e-06	2.67858e-06
		SA02 03	20.0307	1.05254	0.72217	0.052546	0.036053	3.76978e-06	1.85227e-06	0.0621722	0.0861449	-0.107838	-0.253884
		MudTank 04	20.0809	1.05512	0.723898	0.0525434	0.0360491	2.76659e-06	2.73327e-06
		SA02 04	19.9043	1.04584	0.717581	0.0525428	0.0360512	3.45381e-06	2.7003e-06	0.0121612	0.0847338	-0.157841	-0.255295
		MudTank 05	20.0238	1.05207	0.721802	0.052541	0.0360472	3.32887e-06	2.44681e-06
		SA02 05	20.1352	1.05795	0.725857	0.0525422	0.0360492	3.51926e-06	2.47637e-06	0.0290378	0.0599608	-0.140967	-0.28006
		MudTank 06	20.3852	1.07105	0.734822	0.0525404	0.0360468	2.88804e-06	1.96055e-06
		SA02 06	20.3616	1.06977	0.733945	0.0525385	0.0360453	3.61021e-06	2.68108e-06	-0.0217171	-0.0297197	-0.191713	-0.36971
		MudTank 07	20.342	1.06875	0.73325	0.0525389	0.0360459	3.40077e-06	2.94313e-06
		SA02 07	20.1601	1.05922	0.726717	0.0525404	0.036047	3.24571e-06	2.62152e-06	0.0095843	-0.00356997	-0.160417	-0.343569
		MudTank 08	20.3987	1.07177	0.735342	0.052541	0.0360483	3.08593e-06	2.62923e-06
		SA02 08	19.9392	1.04767	0.718866	0.0525434	0.0360527	2.90684e-06	2.59984e-06	0.0353866	0.131354	-0.134619	-0.208691
		MudTank 09	20.3049	1.06686	0.731944	0.0525421	0.0360477	3.32993e-06	2.50268e-06
		SA02 09	20.3933	1.07159	0.735192	0.0525458	0.0360506	2.70323e-06	2.36415e-06	0.0586392	0.0797401	-0.111371	-0.260287
		MudTank 10	20.2202	1.06244	0.728895	0.0525434	0.0360478	3.20343e-06	2.18612e-06
		SA02 10	19.416	1.02009	0.699982	0.0525388	0.0360518	3.1649e-06	2.24727e-06	-0.0676783	0.102239	-0.237667	-0.237796
		MudTank 11	20.4526	1.07461	0.737287	0.0525413	0.0360485	3.09313e-06	2.21813e-06
		SA02 11	19.4565	1.02229	0.70138	0.0525417	0.0360483	3.80876e-06	2.65482e-06	0.012678	0.0448674	-0.157324	-0.295148
		MudTank 12	20.5175	1.07801	0.739551	0.0525407	0.0360449	3.72544e-06	2.3016e-06
		SA02 12	20.3775	1.07073	0.734599	0.0525441	0.0360491	3.83844e-06	2.46109e-06	0.0647613	0.111089	-0.10525	-0.228949
		MudTank 13	20.226	1.06269	0.729053	0.0525407	0.0360452	2.93919e-06	2.07596e-06
		SA02 13	20.334	1.06841	0.733066	0.0525428	0.036051	2.90496e-06	2.39968e-06	0.0361233	0.147814	-0.133883	-0.192236
		MudTank 14	20.4938	1.07677	0.738725	0.0525411	0.0360462	3.37369e-06	2.0902e-06
		SA02 14	20.6835	1.08675	0.745611	0.0525421	0.0360486	2.87121e-06	2.45605e-06	0.0138546	0.0708778	-0.156148	-0.269146
		MudTank 15	20.7709	1.09134	0.748708	0.0525416	0.036046	3.75321e-06	2.58313e-06
		SA02 15	20.2124	1.06207	0.728627	0.0525457	0.0360485	3.17504e-06	2.31433e-06	0.0758712	0.0398179	-0.0941417	-0.300196
		MudTank 16	20.6984	1.08754	0.746139	0.0525419	0.0360481	2.98782e-06	2.06492e-06
		SA02 16	20.0347	1.05268	0.722206	0.052543	0.0360478	2.91045e-06	2.3986e-06	0.0219037	-0.00637932	-0.1481	-0.346377
		MudTank 17	20.6346	1.08418	0.743833	0.0525418	0.0360479	2.78518e-06	2.22258e-06
Shard 3	7 (2021-01-08)	MudTank 01	19.5894	1.02942	0.706335	0.0525499	0.036057	2.9432e-06	2.5038e-06
		SA02 01	20.2652	1.06495	0.73073	0.0525501	0.0360583	3.35375e-06	2.53838e-06	-0.01452	0.00938834	-0.184518	-0.330615
		MudTank 02	20.4216	1.0732	0.736384	0.0525519	0.0360589	3.20001e-06	2.22481e-06
		SA02 02	20.2683	1.06508	0.730819	0.0525491	0.036057	3.36644e-06	2.79769e-06	-0.0216696	-0.0130017	-0.191666	-0.352997
		MudTank 03	20.5531	1.08004	0.741064	0.0525486	0.0360561	3.34913e-06	2.01951e-06
		SA02 03	20.5968	1.08241	0.742643	0.0525518	0.036056	2.61549e-06	2.34782e-06	0.0604048	-0.0257967	-0.109606	-0.365788
		MudTank 04	20.693	1.08739	0.746145	0.0525486	0.0360577	3.11538e-06	1.9656e-06
		SA02 04	20.7881	1.0924	0.749507	0.0525491	0.0360545	2.9878e-06	2.56195e-06	0.0328965	-0.0685612	-0.137109	-0.408538
		MudTank 05	20.6761	1.08645	0.745501	0.0525461	0.0360563	3.25825e-06	2.37574e-06
		SA02 05	20.7887	1.09241	0.749588	0.0525481	0.0360574	3.52343e-06	2.57643e-06	0.0305286	0.0732367	-0.139477	-0.266788
		MudTank 06	20.7852	1.0922	0.749377	0.0525468	0.0360532	2.47476e-06	2.45875e-06
		SA02 06	21.2051	1.1143	0.764527	0.0525487	0.0360538	2.8855e-06	2.20998e-06	0.0538978	0.0142713	-0.116111	-0.325734
		MudTank 07	20.5928	1.08205	0.74244	0.0525451	0.0360534	3.01832e-06	2.16939e-06
		SA02 07	20.6599	1.08562	0.744836	0.0525473	0.0360522	3.04792e-06	2.22525e-06	0.0365028	-0.0222035	-0.133503	-0.362196
		MudTank 08	20.8266	1.09435	0.750854	0.0525458	0.0360525	3.22662e-06	2.25137e-06
		SA02 08	20.6953	1.08747	0.746098	0.0525467	0.0360514	3.02215e-06	2.74181e-06	0.018153	-0.00249747	-0.15185	-0.342497
		MudTank 09	20.3563	1.06964	0.733854	0.0525457	0.0360504	3.30491e-06	2.31013e-06
		SA02 09	20.8555	1.09594	0.751914	0.0525491	0.0360534	2.99226e-06	2.86658e-06	0.0413333	0.052654	-0.128674	-0.287364
		MudTank 10	20.945	1.10062	0.75512	0.0525483	0.0360526	2.97075e-06	2.2436e-06
		SA02 10	20.8898	1.09774	0.753147	0.0525489	0.0360533	3.15005e-06	2.03602e-06	0.0495176	0.0518987	-0.120491	-0.288119
		MudTank 11	21.1367	1.11062	0.761981	0.0525444	0.0360502	2.79082e-06	2.52384e-06
		SA02 11	21.31	1.11978	0.768259	0.0525472	0.0360515	3.37199e-06	2.62158e-06	0.0530393	0.040323	-0.11697	-0.299691
		MudTank 12	21.1239	1.10994	0.761513	0.0525444	0.0360499	3.84148e-06	2.69561e-06
		SA02 12	21.3637	1.12257	0.770226	0.0525454	0.0360527	3.19506e-06	2.31634e-06	0.0313658	0.0925747	-0.13864	-0.247457
		MudTank 13	21.1929	1.11354	0.763977	0.0525431	0.0360488	2.84135e-06	2.02765e-06
		SA02 13	21.5409	1.13192	0.776595	0.0525474	0.036052	2.98041e-06	2.12285e-06	0.0545301	0.0742419	-0.115479	-0.265783
		MudTank 14	21.5111	1.13033	0.775478	0.0525461	0.0360499	3.22607e-06	2.45033e-06
		SA02 14	21.6297	1.1365	0.779758	0.0525434	0.0360501	3.40193e-06	2.53846e-06	-0.0495636	0.0337817	-0.219555	-0.30623
		MudTank 15	21.3557	1.12216	0.769823	0.052546	0.0360478	3.17002e-06	2.32087e-06
		SA02 15	21.4075	1.12496	0.771805	0.0525499	0.0360531	3.38376e-06	2.348e-06	0.0616367	0.137214	-0.108374	-0.202833
		MudTank 16	21.4457	1.12691	0.773086	0.0525473	0.0360485	2.9801e-06	2.60673e-06
		SA02 16	21.1188	1.1097	0.761338	0.0525454	0.0360501	3.58007e-06	2.28464e-06	-0.00818866	0.0428704	-0.178187	-0.297144
		MudTank 17	20.9937	1.1031	0.756797	0.0525443	0.0360487	3.36484e-06	2.47454e-06
	8 (2021-01-08)	MudTank 01	20.9279	1.09969	0.75445	0.0525462	0.0360497	2.58835e-06	2.73169e-06
		SA02 01	20.4647	1.07547	0.73788	0.0525522	0.0360561	3.51107e-06	2.44277e-06	0.0674593	0.136186	-0.102552	-0.203861
		MudTank 02	21.0785	1.1077	0.75994	0.0525511	0.0360527	3.01088e-06	2.38937e-06
		SA02 02	20.6996	1.08778	0.746297	0.0525507	0.0360535	2.86152e-06	2.3807e-06	0.0155534	0.0356711	-0.154449	-0.304341
		MudTank 03	21.2946	1.119	0.767711	0.0525486	0.0360518	3.43336e-06	2.69308e-06
		SA02 03	21.4032	1.12471	0.771665	0.0525482	0.0360535	3.41844e-06	2.71267e-06	-0.0169886	0.0761137	-0.186986	-0.263912
		MudTank 04	21.1324	1.1105	0.761817	0.0525495	0.0360496	3.22451e-06	2.37645e-06
		SA02 04	21.0157	1.10432	0.757773	0.0525474	0.0360573	3.00041e-06	1.88123e-06	-0.0572997	0.157008	-0.22729	-0.183046
		MudTank 05	21.1884	1.11348	0.763921	0.0525513	0.0360536	3.20383e-06	2.32055e-06
		SA02 05	21.5992	1.13499	0.778725	0.0525477	0.0360534	3.50064e-06	2.25566e-06	-0.0439608	0.0113819	-0.213953	-0.328622
		MudTank 06	21.1308	1.1104	0.761813	0.0525486	0.0360522	3.07752e-06	2.70687e-06
		SA02 06	21.1455	1.11113	0.762331	0.0525468	0.0360516	3.41521e-06	2.55321e-06	-0.023273	0.0103207	-0.193269	-0.329683
		MudTank 07	21.36	1.12242	0.770039	0.0525474	0.0360503	2.80759e-06	2.78407e-06
		SA02 07	21.8035	1.14569	0.785965	0.052546	0.0360476	2.9556e-06	2.45527e-06	-0.0156771	-0.0391433	-0.185674	-0.37913
		MudTank 08	21.2092	1.11447	0.764545	0.0525462	0.0360477	3.39985e-06	2.23878e-06
		SA02 08	21.2647	1.11731	0.766572	0.0525431	0.036049	3.06883e-06	2.04134e-06	-0.0193083	0.0650166	-0.189305	-0.275006
		MudTank 09	21.5624	1.13293	0.777232	0.052542	0.0360455	2.90334e-06	2.44748e-06
		SA02 09	21.3143	1.11998	0.768351	0.0525459	0.0360484	3.48096e-06	2.35319e-06	0.0493568	0.0451853	-0.120652	-0.29483
		MudTank 10	21.5888	1.13438	0.77823	0.0525447	0.0360479	2.94965e-06	2.53651e-06
		SA02 10	21.5428	1.13195	0.7766	0.0525442	0.036049	3.13077e-06	2.29608e-06	0.0105895	0.0941745	-0.159412	-0.245857
		MudTank 11	21.6604	1.13809	0.780713	0.0525426	0.0360432	3.3847e-06	2.41165e-06
		SA02 11	21.9084	1.15114	0.789695	0.052543	0.036045	3.21731e-06	2.50381e-06	0.0196515	0.0425103	-0.150352	-0.297504
		MudTank 12	21.486	1.12891	0.774438	0.0525415	0.0360438	3.17464e-06	2.17948e-06
		SA02 12	21.7447	1.14254	0.783768	0.0525435	0.0360439	3.14038e-06	2.73257e-06	0.0329986	0.0446663	-0.137007	-0.295349
		MudTank 13	21.544	1.13197	0.776465	0.0525421	0.0360409	3.33357e-06	2.16927e-06
		SA02 13	21.4084	1.12487	0.771704	0.0525434	0.0360468	3.02598e-06	2.43967e-06	0.00957187	0.127414	-0.16043	-0.21263
		MudTank 14	21.4995	1.12966	0.774915	0.0525437	0.0360435	3.04328e-06	2.45612e-06
		SA02 14	21.6111	1.13554	0.77898	0.0525441	0.0360453	3.34326e-06	2.61495e-06	0.0101505	0.0695605	-0.159851	-0.270463
		MudTank 15	21.4446	1.12677	0.772911	0.0525433	0.0360421	3.29097e-06	2.7451e-06
		SA02 15	21.7661	1.14366	0.78453	0.0525431	0.0360435	2.80385e-06	2.32875e-06	0.0168068	0.078854	-0.153196	-0.261173
		MudTank 16	21.4305	1.12598	0.772339	0.0525411	0.0360392	3.24119e-06	2.11177e-06
		SA02 16	21.1185	1.10963	0.761147	0.0525428	0.0360416	3.59266e-06	2.13236e-06	0.0437983	0.0657198	-0.126209	-0.274303
		MudTank 17	21.6476	1.13737	0.780168	0.0525398	0.0360392	3.12387e-06	2.52034e-06
	9 (2021-01-09	MudTank 01	24.7753	1.29992	0.890777	0.052468	0.0359541	2.97852e-06	2.50286e-06
		SA02 01	25.4946	1.33775	0.916675	0.0524719	0.0359555	3.15167e-06	2.17146e-06	0.0326939	0.0619767	-0.137312	-0.278044
		MudTank 02	25.0854	1.3163	0.901888	0.0524723	0.0359524	3.45861e-06	2.35983e-06
		SA02 02	25.3847	1.33194	0.912699	0.0524701	0.0359546	3.15161e-06	2.22386e-06	-0.0122335	0.0645095	-0.182231	-0.275512
		MudTank 03	25.1647	1.32038	0.904728	0.0524692	0.0359521	3.25306e-06	2.54776e-06
		SA02 03	25.6216	1.34439	0.921206	0.052471	0.0359542	2.95457e-06	2.36724e-06	0.081373	0.115143	-0.0886409	-0.224896
		MudTank 04	25.0205	1.31269	0.899444	0.0524642	0.035948	3.41086e-06	2.21152e-06
		SA02 04	25.5921	1.34276	0.920103	0.0524678	0.0359524	3.11868e-06	2.49515e-06	0.0449619	0.1771	-0.125046	-0.16296
		MudTank 05	25.6043	1.34338	0.920326	0.0524667	0.035944	3.14078e-06	2.51742e-06
		SA02 05	25.5149	1.3387	0.917232	0.0524671	0.0359486	3.05977e-06	2.42435e-06	0.0186406	0.0921775	-0.151363	-0.247854
		MudTank 06	25.1581	1.31994	0.904355	0.0524655	0.0359467	2.96482e-06	2.21188e-06
		SA02 06	25.7238	1.34965	0.924766	0.0524667	0.0359496	2.87103e-06	2.02548e-06	0.0359838	0.111235	-0.134022	-0.228803
		MudTank 07	25.1326	1.31856	0.903381	0.0524641	0.0359446	3.56866e-06	2.18979e-06
		SA02 07	25.521	1.33899	0.917432	0.052466	0.0359477	3.0312e-06	2.56724e-06	0.0516229	0.0965193	-0.118386	-0.243514
		MudTank 08	25.3357	1.32918	0.910671	0.0524625	0.035944	3.25349e-06	2.24674e-06
		SA02 08	25.8454	1.35601	0.929128	0.0524659	0.0359494	3.70183e-06	2.28374e-06	0.0688901	0.159774	-0.101122	-0.18028
		MudTank 09	24.9092	1.3068	0.895325	0.0524621	0.0359433	3.02004e-06	2.08889e-06
		SA02 09	25.7604	1.35159	0.926036	0.0524674	0.0359479	3.63382e-06	1.94185e-06	0.108147	0.143259	-0.0618714	-0.19679
		MudTank 10	24.8539	1.30387	0.893307	0.0524613	0.0359422	3.2152e-06	2.07456e-06
		SA02 10	25.719	1.34943	0.924509	0.0524677	0.0359463	3.558e-06	2.1406e-06	0.132755	0.0868463	-0.0372679	-0.253183
		MudTank 11	25.2079	1.32241	0.906078	0.0524601	0.0359441	2.84251e-06	2.52675e-06
		SA02 11	25.7267	1.34983	0.924795	0.0524677	0.0359465	3.59562e-06	2.80175e-06	0.0947475	0.0898469	-0.0752686	-0.250184
		MudTank 12	25.1594	1.32	0.90429	0.0524653	0.0359423	3.5772e-06	2.29959e-06
		SA02 12	25.6182	1.34412	0.920888	0.052467	0.0359464	3.36698e-06	2.376e-06	0.0829769	0.149793	-0.0870373	-0.190258
		MudTank 13	25.0862	1.31602	0.901594	0.0524601	0.0359397	3.01568e-06	2.31584e-06
		SA02 13	25.7613	1.35159	0.926012	0.0524661	0.0359457	3.01754e-06	2.23217e-06	0.0704909	0.127407	-0.0995211	-0.212636
		MudTank 14	25.1587	1.31995	0.904273	0.0524647	0.0359425	3.37103e-06	2.40899e-06
		SA02 14	25.599	1.34307	0.920181	0.0524656	0.0359459	2.95418e-06	2.04198e-06	0.024509	0.11805	-0.145495	-0.22199
		MudTank 15	25.313	1.32803	0.909773	0.0524639	0.0359408	2.99073e-06	2.26546e-06
		SA02 15	25.5154	1.33874	0.917149	0.0524675	0.0359447	3.06281e-06	1.99265e-06	0.113295	0.0889271	-0.0567243	-0.251103
		MudTank 16	25.8236	1.3547	0.928163	0.0524593	0.0359423	3.36168e-06	2.10065e-06
		SA02 16	25.7807	1.35254	0.926663	0.0524633	0.0359438	3.14816e-06	2.62161e-06	0.0510808	0.0674665	-0.118928	-0.272556
		MudTank 17	25.5482	1.34032	0.91822	0.0524618	0.0359404	3.14163e-06	2.43907e-06

## Sheet: SA02_Solution
SN-MC-ICP-MS Si isotopic data for SA02 zircon
Sample	Session	Signal Intensity (V)			Ratios		δ29/28Si	δ30/28Si
		28Si	29Si	30Si	29/28Si	30/28Si
SA02-Solution 1	1	13.9866	0.751857	0.52694	0.0537558	0.0376744	-0.178154	-0.347171
		13.9938	0.75225	0.527216	0.0537563	0.0376748	-0.184354	-0.326053
		13.9951	0.75232	0.527283	0.0537561	0.0376765	-0.191849	-0.276064
	2	14.2878	0.767759	0.537858	0.0537358	0.0376444	-0.155915	-0.32406
		14.1659	0.76119	0.533271	0.053734	0.0376443	-0.178923	-0.334255
		14.3087	0.768881	0.538646	0.0537355	0.0376447	-0.157553	-0.343835
SA02-Solution 2	1	13.9612	0.750554	0.526068	0.0537604	0.0376806	-0.0965488	-0.145518
		13.9069	0.747622	0.524009	0.0537593	0.0376796	-0.109513	-0.187507
		13.8743	0.745873	0.522785	0.0537592	0.0376798	-0.107886	-0.172132
	2	14.2134	0.763797	0.53513	0.0537379	0.03765	-0.106534	-0.185889
		14.297	0.768302	0.538291	0.0537384	0.0376504	-0.0812481	-0.16766
		14.2344	0.764933	0.535914	0.0537384	0.037649	-0.0761688	-0.204479
AGV	1	12.186	0.65348	0.459177	0.0536261	0.0376808	-0.0805979	-0.168479
		12.2326	0.655948	0.460914	0.0536232	0.0376793	-0.141197	-0.206026
		12.2378	0.656242	0.461104	0.0536242	0.0376789	-0.124033	-0.231972

## Sheet: SA02_Self Bracket
LA-MC-ICP-MS Si isotopic data for SA02 zircon (Self Bracket)
Session	Sample	28Si	29Si	30Si	29/28	30/28	29/28(se)	30/28(se)	δ29Si	δ30Si
1 (2021-01-16)	SA02 01	25.6	1.34	0.92	0.052395	0.035852	3e-06	3e-06
	SA02 02	26.08	1.37	0.94	0.052399	0.035855	3e-06	3e-06	0.06	0.07
	SA02 03	26.09	1.37	0.94	0.052398	0.035854	3e-06	3e-06	0	-0.05
	SA02 04	26.25	1.38	0.94	0.052395	0.035856	3e-06	3e-06	-0.03	0.04
	SA02 05	26.08	1.37	0.94	0.052397	0.035855	3e-06	3e-06	0	-0.03
	SA02 06	26.33	1.38	0.94	0.052397	0.035857	4e-06	2e-06	0.04	0.01
	SA02 07	26.51	1.39	0.95	0.052394	0.035858	4e-06	3e-06	-0.06	0.06
	SA02 08	26.36	1.38	0.95	0.052397	0.035854	3e-06	2e-06	-0.02	-0.1
	SA02 09	26.56	1.39	0.95	0.052402	0.035858	3e-06	3e-06	0.07	0.05
	SA02 10	26.3	1.38	0.94	0.0524	0.035858	3e-06	3e-06	-0.01	0.02
	SA02 11	26.3	1.38	0.94	0.052398	0.035857	4e-06	3e-06	-0.02	0
	SA02 12	26.3	1.38	0.94	0.052399	0.035856	3e-06	3e-06	0	-0.02
	SA02 13	26.46	1.39	0.95	0.052399	0.035857	3e-06	3e-06	0.02	0.02
	SA02 14	26.76	1.4	0.96	0.052398	0.035856	3e-06	2e-06	-0.01	-0.03
	SA02 15	26.79	1.4	0.96	0.052398	0.035857	3e-06	3e-06	0	0.04
	SA02 16	26.31	1.38	0.94	0.052399	0.035856	3e-06	3e-06	0.01	-0.03
	SA02 17	26.61	1.39	0.95	0.052398	0.035857	3e-06	3e-06	-0.03	-0.01
	SA02 18	26.24	1.38	0.94	0.052401	0.035858	3e-06	2e-06	0.06	0.1
	SA02 19	26.2	1.37	0.94	0.052397	0.035852	3e-06	3e-06	-0.06	-0.15
	SA02 20	26.61	1.39	0.95	0.0524	0.035857	4e-06	3e-06	0.09	0.15
	SA02 21	25.89	1.36	0.93	0.052394	0.03585	3e-06	3e-06	-0.12	-0.14
	SA02 22	26.27	1.38	0.94	0.052399	0.035854	3e-06	3e-06	0.04	0.03
	SA02 23	26.32	1.38	0.94	0.0524	0.035856	4e-06	2e-06	0.05	0.06
	SA02 24	26.15	1.37	0.94	0.052397	0.035854	3e-06	3e-06	-0.07	-0.02
	SA02 25	26.24	1.37	0.94	0.052401	0.035853	3e-06	3e-06	0.05	-0.04
	SA02 26	26	1.36	0.93	0.052399	0.035856	3e-06	3e-06	-0.01	0.06
	SA02 27	26.04	1.36	0.93	0.052398	0.035854	3e-06	3e-06	-0.01	-0.03
	SA02 28	25.81	1.35	0.93	0.052398	0.035854	4e-06	3e-06	-0.03	-0.02
	SA02 29	25.93	1.36	0.93	0.0524	0.035855	3e-06	3e-06	0.06	-0.01
	SA02 30	26.08	1.37	0.94	0.052396	0.035857	3e-06	3e-06	-0.04	0.04
	SA02 31	25.88	1.36	0.93	0.052397	0.035855	4e-06	3e-06	0.01	0.02
	SA02 32	25.46	1.33	0.91	0.052397	0.035852	3e-06	3e-06	0	-0.07
	SA02 33	25.32	1.33	0.91	0.052397	0.035854	3e-06	3e-06	-0.06	-0.02
	SA02 34	25.06	1.31	0.9	0.052403	0.035857	3e-06	2e-06
2 (2021-01-16)	SA02 01	25.22	1.32	0.9	0.052396	0.035858	3e-06	3e-06
	SA02 02	25.93	1.36	0.93	0.052401	0.03586	3e-06	3e-06	0.06	0.09
	SA02 03	26.21	1.37	0.94	0.0524	0.035856	3e-06	3e-06	0.06	-0.02
	SA02 04	24.61	1.29	0.88	0.052392	0.035853	3e-06	2e-06	-0.16	-0.13
	SA02 05	25.95	1.36	0.93	0.052402	0.03586	3e-06	3e-06	0.12	0.17
	SA02 06	25.55	1.34	0.92	0.052398	0.035855	3e-06	3e-06	-0.03	-0.09
	SA02 07	25.68	1.35	0.92	0.052398	0.035856	3e-06	3e-06	0.05	0.07
	SA02 08	25.72	1.35	0.92	0.052393	0.035852	4e-06	3e-06	-0.1	-0.09
	SA02 09	25.41	1.33	0.91	0.052399	0.035854	4e-06	3e-06	0.08	0.03
	SA02 10	25.4	1.33	0.91	0.052396	0.035855	3e-06	3e-06	-0.02	-0.01
	SA02 11	25.56	1.34	0.92	0.052396	0.035856	3e-06	2e-06	-0.03	0.01
	SA02 12	25.24	1.32	0.91	0.052398	0.035856	4e-06	3e-06	0.05	0.03
	SA02 13	24.36	1.28	0.87	0.052395	0.035854	3e-06	3e-06	-0.06	-0.07
	SA02 14	24.77	1.3	0.89	0.052398	0.035857	3e-06	3e-06	0.05	0.08
	SA02 15	23.83	1.25	0.85	0.052397	0.035854	3e-06	3e-06	-0.01	-0.08
	SA02 16	23.94	1.25	0.86	0.052396	0.035856	3e-06	2e-06	-0.01	0
	SA02 17	25.59	1.34	0.92	0.052397	0.035859	4e-06	3e-06	-0.01	0.11
	SA02 18	25.53	1.34	0.92	0.052398	0.035854	3e-06	3e-06	0.01	-0.11
	SA02 19	25.96	1.36	0.93	0.052398	0.035856	3e-06	3e-06	0.01	0.03
	SA02 20	26	1.36	0.93	0.052398	0.035857	3e-06	3e-06	0	0.04
	SA02 21	26.36	1.38	0.95	0.052397	0.035854	3e-06	3e-06	-0.02	-0.08
	SA02 22	25.99	1.36	0.93	0.0524	0.035858	3e-06	3e-06	0	0.01
	SA02 23	26.21	1.37	0.94	0.052402	0.035861	3e-06	3e-06	0.03	0.06
	SA02 24	26.05	1.36	0.93	0.0524	0.035859	3e-06	3e-06	-0.03	-0.02
	SA02 25	26.21	1.37	0.94	0.052402	0.035859	3e-06	2e-06	0.01	0
	SA02 26	26.21	1.37	0.94	0.052403	0.035859	3e-06	3e-06	0.01	0.02
	SA02 27	26.17	1.37	0.94	0.052402	0.035857	3e-06	3e-06	0	0
	SA02 28	26.09	1.37	0.94	0.052401	0.035856	3e-06	2e-06	-0.02	-0.05
	SA02 29	26.28	1.38	0.94	0.052402	0.035857	4e-06	3e-06	0.05	0.05
	SA02 30	26.03	1.36	0.93	0.052398	0.035856	3e-06	3e-06	-0.05	-0.03
	SA02 31	26.24	1.37	0.94	0.052399	0.035856	4e-06	3e-06	0.02	0.03
	SA02 32	25.9	1.36	0.93	0.052398	0.035854	3e-06	3e-06	0	-0.03
	SA02 33	25.84	1.35	0.93	0.0524	0.035854	3e-06	2e-06	0.04	0
	SA02 34	26.05	1.36	0.93	0.052397	0.035854	4e-06	3e-06
3 (2021-01-16)	SA02 01	24.76	1.3	0.89	0.052396	0.035853	3e-06	2e-06
	SA02 02	25.26	1.32	0.91	0.052399	0.035854	3e-06	2e-06	0.08	0.03
	SA02 03	25.06	1.31	0.9	0.052394	0.035853	3e-06	2e-06	-0.03	-0.02
	SA02 04	25.04	1.31	0.9	0.052393	0.035854	3e-06	3e-06	-0.07	-0.03
	SA02 05	24.98	1.31	0.9	0.052399	0.035857	3e-06	3e-06	0.06	0.06
	SA02 06	25.39	1.33	0.91	0.052399	0.035855	3e-06	2e-06	0.02	-0.03
	SA02 07	25.51	1.34	0.91	0.052397	0.035856	3e-06	2e-06	-0.02	0.06
	SA02 08	25.94	1.36	0.93	0.052397	0.035853	4e-06	3e-06	0.01	-0.02
	SA02 09	25.86	1.35	0.93	0.052396	0.035851	3e-06	3e-06	-0.02	-0.09
	SA02 10	25.69	1.35	0.92	0.052397	0.035855	3e-06	2e-06	-0.01	0.09
	SA02 11	25.63	1.34	0.92	0.052399	0.035853	3e-06	2e-06	0.02	-0.03
	SA02 12	25.79	1.35	0.92	0.052399	0.035852	3e-06	2e-06	0.01	-0.02
	SA02 13	25.63	1.34	0.92	0.052398	0.035853	3e-06	2e-06	0	-0.02
	SA02 14	25.54	1.34	0.92	0.052398	0.035856	3e-06	2e-06	-0.01	0.04
	SA02 15	25.76	1.35	0.92	0.052398	0.035855	3e-06	2e-06	0.02	0.01
	SA02 16	25.65	1.34	0.92	0.052397	0.035855	3e-06	2e-06	0	0.04
	SA02 17	25.65	1.34	0.92	0.052396	0.035851	3e-06	2e-06	-0.03	-0.08
	SA02 18	25.56	1.34	0.92	0.052397	0.035854	3e-06	3e-06	0.02	0.04
	SA02 19	25.45	1.33	0.91	0.052397	0.035853	3e-06	3e-06	0	-0.01
	SA02 20	25.56	1.34	0.92	0.052396	0.035854	3e-06	2e-06	0	0.03
	SA02 21	25.73	1.35	0.92	0.052396	0.035852	3e-06	2e-06	-0.02	-0.06
	SA02 22	25.17	1.32	0.9	0.052398	0.035854	3e-06	2e-06	0.02	0.02
	SA02 23	25.51	1.34	0.91	0.052398	0.035855	3e-06	3e-06	0.02	0.03
	SA02 24	25.56	1.34	0.92	0.052397	0.035854	3e-06	3e-06	-0.04	-0.05
	SA02 25	25.47	1.33	0.91	0.0524	0.035856	2e-06	2e-06	0.06	0.12
	SA02 26	24.95	1.31	0.89	0.052396	0.035849	3e-06	3e-06	-0.05	-0.19
	SA02 27	25.61	1.34	0.92	0.052398	0.035856	3e-06	3e-06	0.03	0.16
	SA02 28	25.26	1.32	0.91	0.052397	0.035851	3e-06	3e-06	-0.01	-0.07
	SA02 29	25.24	1.32	0.9	0.052396	0.035852	3e-06	3e-06	0.01	-0.01
	SA02 30	25.48	1.33	0.91	0.052395	0.035852	3e-06	3e-06	0.02	0.03
	SA02 31	26.01	1.36	0.93	0.052391	0.035851	3e-06	3e-06	-0.1	0.01
	SA02 32	25.63	1.34	0.92	0.052398	0.035849	3e-06	3e-06	0.11	-0.05
	SA02 33	25.88	1.36	0.93	0.052393	0.03585	3e-06	3e-06	-0.09	-0.03
	SA02 34	25.68	1.35	0.92	0.052397	0.035853	3e-06	2e-06
4 (2021-01-17)	SA02 01	25.77	1.35	0.92	0.052396	0.035854	3e-06	2e-06
	SA02 02	25.93	1.36	0.93	0.052395	0.035852	3e-06	3e-06	-0.01	-0.02
	SA02 03	25.84	1.35	0.93	0.052396	0.035852	3e-06	2e-06	0	0.01
	SA02 04	25.7	1.35	0.92	0.052396	0.035852	3e-06	2e-06	0.02	-0.03
	SA02 05	25.78	1.35	0.92	0.052394	0.035854	3e-06	3e-06	-0.01	0.03
	SA02 06	26.11	1.37	0.94	0.052394	0.035853	3e-06	3e-06	-0.06	0
	SA02 07	25.69	1.35	0.92	0.052399	0.035852	3e-06	3e-06	0.09	-0.01
	SA02 08	26.34	1.38	0.94	0.052395	0.035852	3e-06	3e-06	-0.04	-0.01
	SA02 09	25.14	1.32	0.9	0.052395	0.035853	3e-06	3e-06	0	0.02
	SA02 10	25.99	1.36	0.93	0.052396	0.035852	3e-06	2e-06	0.03	-0.02
	SA02 11	25.35	1.33	0.91	0.052394	0.035853	3e-06	2e-06	-0.03	0.04
	SA02 12	26.61	1.39	0.95	0.052394	0.035851	3e-06	3e-06	0	-0.03
	SA02 13	25.12	1.32	0.9	0.052394	0.035851	3e-06	3e-06	-0.01	0
	SA02 14	25.75	1.35	0.92	0.052395	0.035851	3e-06	2e-06	-0.02	-0.01
	SA02 15	25.23	1.32	0.9	0.052399	0.035852	3e-06	3e-06	0.06	0.04
	SA02 16	25.92	1.36	0.93	0.052397	0.03585	3e-06	2e-06	0	-0.03
	SA02 17	25.18	1.32	0.9	0.052394	0.035851	3e-06	2e-06	-0.07	-0.03
	SA02 18	25.75	1.35	0.92	0.052398	0.035853	3e-06	2e-06	0.08	0.05
	SA02 19	25.11	1.32	0.9	0.052394	0.035852	3e-06	3e-06	-0.06	0.02
	SA02 20	25.44	1.33	0.91	0.052396	0.03585	3e-06	3e-06	0	-0.02
	SA02 21	25.15	1.32	0.9	0.052398	0.03585	4e-06	2e-06	0.02	-0.07
	SA02 22	25.68	1.35	0.92	0.052397	0.035854	3e-06	3e-06	-0.01	0.06
	SA02 23	25.51	1.34	0.91	0.052398	0.035854	3e-06	2e-06	0.02	-0.01
	SA02 24	25.6	1.34	0.92	0.052396	0.035854	3e-06	2e-06	-0.03	0.04
	SA02 25	25.52	1.34	0.91	0.052398	0.035852	3e-06	2e-06	0	-0.03
	SA02 26	25.52	1.34	0.91	0.052399	0.035852	3e-06	3e-06	0.02	-0.03
	SA02 27	25.67	1.35	0.92	0.052398	0.035854	3e-06	2e-06	0	0.08
	SA02 28	24.87	1.3	0.89	0.052396	0.03585	3e-06	2e-06	0.01	-0.06
	SA02 29	25.68	1.35	0.92	0.052394	0.03585	3e-06	2e-06	-0.05	-0.02
	SA02 30	25.38	1.33	0.91	0.052398	0.035852	3e-06	2e-06	0.06	0.05
	SA02 31	25.86	1.36	0.93	0.052395	0.035851	4e-06	3e-06	-0.03	0
	SA02 32	25.9	1.36	0.93	0.052395	0.03585	3e-06	2e-06	-0.01	-0.03
	SA02 33	25.57	1.34	0.92	0.05239	0.035847	3e-06	3e-06	-0.09	-0.08
	SA02 34	25.66	1.34	0.92	0.052395	0.03585	3e-06	2e-06
5 (2021-01-18)	SA02 01	25.99	1.36	0.93	0.052398	0.035848	3e-06	2e-06
	SA02 02	26.84	1.41	0.96	0.052398	0.035849	3e-06	3e-06	0.02	0.01
	SA02 03	26.59	1.39	0.95	0.052396	0.035849	3e-06	3e-06	0	-0.01
	SA02 04	26.21	1.37	0.94	0.052394	0.03585	3e-06	3e-06	-0.02	0
	SA02 05	26.14	1.37	0.94	0.052394	0.035851	3e-06	3e-06	0.01	0.04
	SA02 06	26.82	1.41	0.96	0.052393	0.035849	4e-06	3e-06	-0.02	-0.01
	SA02 07	26.53	1.39	0.95	0.052394	0.035848	3e-06	3e-06	0.04	-0.04
	SA02 08	26.39	1.38	0.95	0.052391	0.03585	3e-06	2e-06	-0.09	0.04
	SA02 09	26.27	1.38	0.94	0.052397	0.035849	3e-06	2e-06	0.08	-0.03
	SA02 10	26.91	1.41	0.96	0.052395	0.03585	3e-06	3e-06	-0.03	0
	SA02 11	26.78	1.4	0.96	0.052396	0.035851	3e-06	3e-06	0.01	0.04
	SA02 12	26.76	1.4	0.96	0.052396	0.035849	3e-06	3e-06	0.04	0
	SA02 13	26.22	1.37	0.94	0.052392	0.035847	3e-06	3e-06	-0.06	-0.1
	SA02 14	26.82	1.41	0.96	0.052394	0.035852	3e-06	3e-06	-0.01	0.06
	SA02 15	26.57	1.39	0.95	0.052397	0.035853	3e-06	3e-06	0.07	0.1
	SA02 16	26.39	1.38	0.95	0.052393	0.035847	3e-06	3e-06	-0.02	-0.07
	SA02 17	26.27	1.38	0.94	0.052391	0.035846	3e-06	3e-06	-0.05	-0.06
	SA02 18	26.62	1.39	0.95	0.052394	0.035849	3e-06	3e-06	0	0.01
	SA02 19	26.51	1.39	0.95	0.052397	0.035851	3e-06	3e-06	0.04	0.04
	SA02 20	26.36	1.38	0.94	0.052396	0.03585	3e-06	2e-06	0.01	0.03
	SA02 21	26.33	1.38	0.94	0.052394	0.035847	3e-06	3e-06	-0.01	-0.06
	SA02 22	26.11	1.37	0.94	0.052393	0.035848	3e-06	2e-06	-0.04	-0.03
	SA02 23	26.47	1.39	0.95	0.052396	0.035851	3e-06	3e-06	0.04	0.06
	SA02 24	26.45	1.39	0.95	0.052395	0.03585	3e-06	3e-06	0	0
	SA02 25	26.13	1.37	0.94	0.052394	0.035849	3e-06	3e-06	0.02	-0.03
	SA02 26	26.15	1.37	0.94	0.052391	0.03585	4e-06	3e-06	-0.09	0
	SA02 27	26.12	1.37	0.94	0.052397	0.035851	3e-06	3e-06	0.09	0.06
	SA02 28	26.2	1.37	0.94	0.052394	0.035848	3e-06	3e-06	-0.04	-0.06
	SA02 29	26.27	1.38	0.94	0.052395	0.035849	4e-06	2e-06	0.03	0.01
	SA02 30	25.79	1.35	0.92	0.052393	0.035849	3e-06	3e-06	0	0.03
	SA02 31	26.28	1.38	0.94	0.052391	0.035847	3e-06	2e-06	-0.07	-0.03
	SA02 32	26.37	1.38	0.95	0.052396	0.035847	3e-06	3e-06	0.05	-0.01
	SA02 33	26.35	1.38	0.94	0.052391	0.035847	3e-06	3e-06	-0.1	-0.01
	SA02 34	26.23	1.37	0.94	0.052396	0.035848	3e-06	2e-06
6 (2021-01-18)	SA02 01	27.91	1.46	1	0.052374	0.035677	3e-06	4e-06
	SA02 02	28.15	1.47	1	0.052378	0.035683	3e-06	3e-06	0.01	0.12
	SA02 03	27.78	1.46	0.99	0.052381	0.035682	3e-06	4e-06	0.04	-0.07
	SA02 04	27.72	1.45	0.99	0.05238	0.035685	4e-06	4e-06	-0.05	0.01
	SA02 05	27.78	1.46	0.99	0.052385	0.035687	3e-06	4e-06	0.05	0.09
	SA02 06	27.48	1.44	0.98	0.052384	0.035683	3e-06	4e-06	-0.01	-0.1
	SA02 07	27.59	1.45	0.98	0.052384	0.035686	3e-06	4e-06	0.03	0.05
	SA02 08	27.98	1.47	1	0.052381	0.035686	4e-06	4e-06	-0.03	-0.01
	SA02 09	28.14	1.47	1	0.05238	0.035686	3e-06	4e-06	0	0.02
	SA02 10	28.34	1.48	1.01	0.05238	0.035685	3e-06	4e-06	0.04	0.02
	SA02 11	27.91	1.46	1	0.052377	0.035683	3e-06	4e-06	-0.05	-0.07
	SA02 12	28.55	1.5	1.02	0.052378	0.035685	3e-06	4e-06	-0.05	-0.03
	SA02 13	28.53	1.49	1.02	0.052385	0.03569	3e-06	4e-06	0.11	0.09
	SA02 14	28.8	1.51	1.03	0.05238	0.035688	3e-06	4e-06	-0.01	0.1
	SA02 15	28.44	1.49	1.01	0.052376	0.035679	3e-06	3e-06	-0.08	-0.19
	SA02 16	28.39	1.49	1.01	0.052381	0.035684	3e-06	4e-06	0.06	0.05
	SA02 17	28.53	1.49	1.02	0.052379	0.035685	3e-06	5e-06	-0.02	-0.01
	SA02 18	28.37	1.49	1.01	0.05238	0.035686	4e-06	4e-06	0.01	0.03
	SA02 19	28.37	1.49	1.01	0.05238	0.035686	3e-06	4e-06	-0.02	0.06
	SA02 20	28.21	1.48	1.01	0.052381	0.035681	3e-06	4e-06	0.04	-0.1
	SA02 21	28.56	1.5	1.02	0.052378	0.035684	3e-06	4e-06	-0.05	0.06
	SA02 22	28.21	1.48	1.01	0.052381	0.035682	3e-06	4e-06	0.04	0
	SA02 23	28.15	1.47	1	0.052379	0.03568	3e-06	4e-06	-0.02	-0.11
	SA02 24	28.73	1.5	1.03	0.052379	0.035686	3e-06	4e-06	0.02	0.14
	SA02 25	28.45	1.49	1.02	0.052377	0.035682	4e-06	3e-06	-0.04	-0.01
	SA02 26	28.01	1.47	1	0.052379	0.035679	3e-06	4e-06	0.06	-0.07
	SA02 27	28.23	1.48	1.01	0.052375	0.035681	3e-06	4e-06	-0.09	0.03
	SA02 28	28.48	1.49	1.02	0.052381	0.035681	3e-06	4e-06	0.08	0.01
	SA02 29	28.08	1.47	1	0.052378	0.03568	3e-06	4e-06	-0.02	0
	SA02 30	28.16	1.47	1	0.052377	0.035679	3e-06	4e-06	-0.02	-0.04
	SA02 31	28.22	1.48	1.01	0.052379	0.03568	3e-06	4e-06	0.01	-0.02
	SA02 32	28.18	1.48	1.01	0.052381	0.035683	3e-06	4e-06	0.03	0.04
	SA02 33	28.27	1.48	1.01	0.052378	0.035682	3e-06	5e-06	-0.04	-0.04
	SA02 34	28.33	1.48	1.01	0.052379	0.035683	3e-06	4e-06
7 (2021-01-18)	SA02 01	27.68	1.45	0.99	0.052379	0.035679	2e-06	4e-06
	SA02 02	27.94	1.46	1	0.052385	0.035685	3e-06	4e-06	0.06	0.12
	SA02 03	27.79	1.46	0.99	0.052384	0.035684	3e-06	5e-06	0.01	-0.01
	SA02 04	27.83	1.46	0.99	0.052382	0.035683	3e-06	4e-06	0	-0.07
	SA02 05	28.56	1.5	1.02	0.05238	0.035687	3e-06	4e-06	-0.05	0.1
	SA02 06	27.99	1.47	1	0.052383	0.035684	3e-06	4e-06	0.05	-0.04
	SA02 07	27.85	1.46	0.99	0.05238	0.035683	3e-06	4e-06	-0.05	-0.04
	SA02 08	28.38	1.49	1.01	0.052383	0.035686	3e-06	4e-06	0.01	0.05
	SA02 09	28.55	1.5	1.02	0.052384	0.035685	3e-06	3e-06	0.04	-0.02
	SA02 10	28.48	1.49	1.02	0.052381	0.035686	3e-06	4e-06	-0.03	0.04
	SA02 11	28.11	1.47	1	0.052382	0.035684	3e-06	4e-06	0.02	0.02
	SA02 12	28.04	1.47	1	0.05238	0.035682	3e-06	4e-06	-0.01	-0.1
	SA02 13	28.17	1.48	1.01	0.05238	0.035686	3e-06	4e-06	-0.05	0.07
	SA02 14	28.4	1.49	1.01	0.052384	0.035685	3e-06	4e-06	0.09	0.04
	SA02 15	27.98	1.47	1	0.052379	0.035682	2e-06	4e-06	-0.07	-0.05
	SA02 16	27.8	1.46	0.99	0.052382	0.035682	3e-06	3e-06	0.05	0
	SA02 17	28.09	1.47	1	0.052379	0.035682	3e-06	3e-06	0	0.05
	SA02 18	28	1.47	1	0.052377	0.035678	3e-06	4e-06	-0.06	-0.11
	SA02 19	27.98	1.47	1	0.052381	0.035682	3e-06	4e-06	0.04	0.04
	SA02 20	28	1.47	1	0.052381	0.035684	3e-06	4e-06	0.02	-0.01
	SA02 21	28.25	1.48	1.01	0.05238	0.035686	3e-06	5e-06	-0.02	0.11
	SA02 22	28.08	1.47	1	0.05238	0.03568	3e-06	4e-06	-0.02	-0.12
	SA02 23	28.21	1.48	1.01	0.052383	0.035683	3e-06	4e-06	0.03	0.05
	SA02 24	28.23	1.48	1.01	0.052382	0.035683	3e-06	4e-06	0.01	0.03
	SA02 25	28.11	1.47	1	0.05238	0.035681	4e-06	4e-06	-0.02	-0.05
	SA02 26	28.04	1.47	1	0.05238	0.035682	3e-06	3e-06	-0.02	0.01
	SA02 27	28.13	1.47	1	0.052382	0.035683	3e-06	3e-06	0.06	0.02
	SA02 28	27.71	1.45	0.99	0.052379	0.035682	3e-06	4e-06	-0.06	-0.03
	SA02 29	28.27	1.48	1.01	0.052381	0.035683	3e-06	4e-06	0	0.01
	SA02 30	28.06	1.47	1	0.052384	0.035683	3e-06	4e-06	0.03	-0.05
	SA02 31	28.61	1.5	1.02	0.052384	0.035687	3e-06	4e-06	0	0.1
	SA02 32	28.1	1.47	1	0.052383	0.035684	3e-06	3e-06	0.02	-0.07
	SA02 33	28.72	1.5	1.03	0.052381	0.035686	3e-06	3e-06
8 (2021-01-18)	SA02 01	28.58	1.5	1.02	0.05238	0.03568	3e-06	3e-06
	SA02 02	28.81	1.51	1.03	0.052381	0.035683	3e-06	4e-06	0	0
	SA02 03	28.65	1.5	1.02	0.052382	0.035686	3e-06	3e-06	0.01	0.04
	SA02 04	28.85	1.51	1.03	0.052382	0.035686	3e-06	3e-06	-0.02	-0.03
	SA02 05	28.88	1.51	1.03	0.052384	0.035688	3e-06	4e-06	0.05	0.03
	SA02 06	28.86	1.51	1.03	0.052381	0.035688	3e-06	4e-06	-0.01	0.08
	SA02 07	28.97	1.52	1.03	0.052379	0.035682	3e-06	3e-06	-0.04	-0.14
	SA02 08	29	1.52	1.03	0.052381	0.035686	4e-06	4e-06	0.07	0.07
	SA02 09	28.81	1.51	1.03	0.052376	0.035685	3e-06	3e-06	-0.1	0.03
	SA02 10	28.67	1.5	1.02	0.052381	0.035682	3e-06	3e-06	0.04	-0.08
	SA02 11	28.91	1.51	1.03	0.052382	0.035685	3e-06	3e-06	0.01	-0.01
	SA02 12	29.29	1.53	1.05	0.052382	0.035689	3e-06	3e-06	0.05	0.14
	SA02 13	28.62	1.5	1.02	0.052377	0.035683	3e-06	4e-06	-0.06	-0.07
	SA02 14	28.94	1.52	1.03	0.052378	0.035682	3e-06	3e-06	0.01	-0.01
	SA02 15	28.9	1.51	1.03	0.052378	0.035682	3e-06	3e-06	-0.02	0.01
	SA02 16	28.63	1.5	1.02	0.05238	0.035681	3e-06	4e-06	0.02	-0.04
	SA02 17	28.72	1.5	1.02	0.05238	0.035683	3e-06	3e-06	0.01	0.01
	SA02 18	29.1	1.52	1.04	0.052379	0.035684	3e-06	3e-06	0	0.03
	SA02 19	28.98	1.52	1.03	0.052378	0.035683	3e-06	3e-06	-0.01	-0.03
	SA02 20	29.1	1.52	1.04	0.052378	0.035684	3e-06	3e-06	-0.03	0.07
	SA02 21	28.95	1.52	1.03	0.052381	0.03568	3e-06	3e-06	0.04	-0.11
	SA02 22	29.02	1.52	1.04	0.05238	0.035684	3e-06	4e-06	-0.01	0.08
	SA02 23	28.8	1.51	1.03	0.05238	0.035682	3e-06	3e-06	0.01	-0.01
	SA02 24	28.98	1.52	1.03	0.052379	0.035681	3e-06	4e-06	0.02	-0.03
	SA02 25	28.9	1.51	1.03	0.052376	0.035682	3e-06	3e-06	-0.06	0.01
	SA02 26	28.99	1.52	1.03	0.052379	0.035682	3e-06	3e-06	0.04	0.01
	SA02 27	29.17	1.53	1.04	0.052378	0.035681	3e-06	3e-06	-0.03	-0.01
	SA02 28	28.86	1.51	1.03	0.05238	0.035681	3e-06	3e-06	0.04	-0.07
	SA02 29	29.15	1.53	1.04	0.052378	0.035686	3e-06	3e-06	0	0.13
	SA02 30	28.97	1.52	1.03	0.052376	0.035682	3e-06	4e-06	-0.01	0
	SA02 31	28.82	1.51	1.03	0.052378	0.035679	3e-06	4e-06	0.05	-0.03
	SA02 32	28.88	1.51	1.03	0.052375	0.035678	4e-06	3e-06

## Sheet: 91500_LA
LA-MC-ICP-MS Si isotopic data for 91500 zircon ( Mud Tank zircon used as Reference material)
Session	Sample	28Si	29Si	30Si	29/28	30/28	29/28(se)	30/28(se)	d 29/28	d 30/28	To NBS
											d 29/28	d 30/28
Session 1 (2021-1-14)	MudTank 01	17.8611	0.936772	0.639464	0.0524473	0.0358014	3.69881e-06	3.37497e-06
	91500 01	17.9426	0.941069	0.642534	0.0524487	0.0358095	3.34726e-06	3.84906e-06	0.00406554	0.104747	-0.165935	-0.235288
	MudTank 02	18.2415	0.956763	0.653237	0.0524497	0.0358102	3.72636e-06	3.02361e-06
	91500 02	18.471	0.968893	0.661609	0.0524548	0.0358182	3.06219e-06	3.29814e-06	0.0459198	0.139295	-0.124088	-0.200753
	MudTank 03	18.2848	0.959134	0.654904	0.0524551	0.0358162	3.06793e-06	4.06955e-06
	91500 03	18.5482	0.97299	0.664405	0.0524571	0.0358198	3.46179e-06	3.80088e-06	0.0221776	0.0935407	-0.147826	-0.246491
	MudTank 04	18.2596	0.957843	0.654008	0.0524568	0.0358168	3.6042e-06	3.2789e-06
	91500 04	18.6372	0.977677	0.667606	0.0524582	0.0358205	2.37667e-06	3.47188e-06	-0.00113132	0.0768166	-0.171131	-0.26321
	MudTank 05	18.3784	0.964126	0.658298	0.0524597	0.0358187	3.31338e-06	3.64023e-06
	91500 05	18.0061	0.944587	0.644963	0.0524588	0.0358181	3.7552e-06	4.22074e-06	-0.0634284	-0.062166	-0.233418	-0.402145
	MudTank 06	18.3618	0.963344	0.657764	0.0524646	0.035822	3.36855e-06	3.58068e-06
	91500 06	18.2978	0.959943	0.655472	0.052462	0.0358218	3.08698e-06	3.54436e-06	-0.0490591	-0.0127685	-0.219051	-0.352764
	MudTank 07	18.7296	0.982645	0.670949	0.0524645	0.0358225	3.30744e-06	3.18522e-06
	91500 07	18.2215	0.955997	0.652827	0.0524652	0.0358266	3.13448e-06	3.36244e-06	0.0359212	0.149551	-0.134085	-0.190499
	MudTank 08	18.3047	0.960306	0.655684	0.0524621	0.0358201	3.33454e-06	3.41841e-06
	91500 08	18.654	0.978768	0.668373	0.0524694	0.0358297	3.54299e-06	2.66153e-06	0.120139	0.21916	-0.0498813	-0.120915
	MudTank 09	18.2215	0.955978	0.652768	0.0524641	0.0358236	3.2086e-06	3.22739e-06
	91500 09	18.466	0.968824	0.661637	0.0524652	0.0358295	2.97339e-06	3.70603e-06	0.0016038	0.166443	-0.168396	-0.173614
	MudTank 10	18.2762	0.958888	0.654731	0.0524662	0.0358234	3.88608e-06	3.66755e-06
	91500 10	18.677	0.979961	0.669232	0.0524687	0.0358313	3.26476e-06	3.34851e-06	0.0231154	0.113988	-0.146889	-0.226051
	MudTank 11	18.3482	0.962711	0.657442	0.0524689	0.035831	2.99239e-06	2.96242e-06
	91500 11	18.8817	0.990774	0.676666	0.0524724	0.0358367	2.81137e-06	3.20361e-06	0.0540101	0.177221	-0.115999	-0.16284
	MudTank 12	18.4656	0.968902	0.661627	0.0524703	0.0358298	3.46612e-06	3.39764e-06
	91500 12	18.6749	0.979985	0.66923	0.0524758	0.0358353	3.8242e-06	3.74735e-06	0.0716565	0.091891	-0.0983557	-0.24814
	MudTank 13	18.5909	0.975532	0.666199	0.0524738	0.0358343	3.49882e-06	2.84234e-06
	91500 13	18.6788	0.980218	0.669419	0.0524774	0.0358379	3.41955e-06	3.45383e-06	0.0671376	0.063765	-0.102874	-0.276257
	MudTank 14	18.665	0.97943	0.668903	0.0524739	0.035837	3.62738e-06	3.02995e-06
	91500 14	18.7485	0.983835	0.671929	0.0524749	0.0358384	3.41113e-06	3.39143e-06	0.0311817	0.038928	-0.138824	-0.301085
	MudTank 15	18.6101	0.976524	0.666939	0.0524727	0.0358371	3.12636e-06	3.23975e-06
	91500 15	18.9595	0.994899	0.679502	0.0524748	0.035839	3.27753e-06	3.97091e-06	0.0181363	0.0570214	-0.151867	-0.282998
	MudTank 16	18.5929	0.975662	0.666316	0.052475	0.0358369	3.12829e-06	3.01699e-06
	91500 16	19.2359	1.0094	0.68942	0.0524744	0.0358398	2.58517e-06	2.79757e-06	-0.0419115	0.0113382	-0.211904	-0.328666
	MudTank 17	18.9392	0.993897	0.678829	0.0524781	0.035842	2.90858e-06	3.43439e-06
Session 2 (2021-1-15)	MudTank 01	20.2414	1.06169	0.727917	0.0524514	0.0359618	3.58254e-06	2.36995e-06
	91500 01	20.9047	1.09659	0.751946	0.0524567	0.0359702	2.85696e-06	1.93175e-06	-0.0510007	-0.0263321	-0.220992	-0.366323
	MudTank 02	20.7945	1.09104	0.748201	0.0524673	0.0359804	3.09946e-06	2.44486e-06
	91500 02	21.0092	1.10246	0.756071	0.0524746	0.0359875	3.74495e-06	2.56466e-06	0.0609525	0.134493	-0.109058	-0.205553
	MudTank 03	20.6626	1.08429	0.743546	0.0524755	0.0359849	3.04814e-06	2.62924e-06
	91500 03	20.8759	1.09554	0.751275	0.0524784	0.0359875	3.32325e-06	2.57254e-06	0.0452236	0.0552912	-0.124784	-0.284728
	MudTank 04	20.6773	1.08508	0.7441	0.0524766	0.0359861	2.92383e-06	2.31661e-06
	91500 04	21.0499	1.10474	0.757587	0.0524816	0.0359897	3.37693e-06	2.86204e-06	0.0726541	0.11058	-0.0973582	-0.229457
	MudTank 05	20.8548	1.09444	0.75047	0.0524789	0.0359854	3.30878e-06	2.21449e-06
	91500 05	21.2752	1.11657	0.765662	0.0524822	0.0359882	3.06697e-06	2.01093e-06	0.072047	0.181094	-0.0979652	-0.158968
	MudTank 06	20.6996	1.08628	0.744738	0.0524779	0.035978	3.11366e-06	2.60323e-06
	91500 06	20.7983	1.09159	0.748424	0.0524844	0.0359846	3.4684e-06	2.31416e-06	0.10485	0.162805	-0.0651679	-0.17725
	MudTank 07	20.4952	1.07559	0.737413	0.0524799	0.0359795	3.74666e-06	3.24286e-06
	91500 07	20.845	1.09419	0.75017	0.0524919	0.035988	3.14418e-06	2.61409e-06	0.185724	0.117213	0.0156928	-0.222826
	MudTank 08	20.2147	1.06096	0.727492	0.0524844	0.035988	3.19606e-06	2.38114e-06
	91500 08	20.7967	1.09161	0.748543	0.0524892	0.0359931	3.60815e-06	2.71714e-06	0.089702	0.104955	-0.0803132	-0.235081
	MudTank 09	20.1507	1.05761	0.725242	0.0524846	0.0359907	4.25729e-06	2.62669e-06
	91500 09	20.7341	1.08842	0.746281	0.0524939	0.0359927	3.43718e-06	2.59068e-06	0.144686	0.0593775	-0.0253381	-0.280643
	MudTank 10	20.3304	1.06711	0.731705	0.052488	0.0359904	3.146e-06	2.89925e-06
	91500 10	20.8059	1.0922	0.748938	0.0524944	0.0359961	3.13366e-06	2.84018e-06	0.0811334	0.111803	-0.0888804	-0.228235
	MudTank 11	20.3603	1.06877	0.732843	0.0524924	0.0359938	3.33425e-06	2.33004e-06
	91500 11	20.7181	1.08763	0.745824	0.0524962	0.0359984	3.14865e-06	2.55503e-06	0.0517372	0.148337	-0.118272	-0.191714
	MudTank 12	20.2406	1.06253	0.728514	0.0524946	0.0359925	3.88957e-06	2.53874e-06
	91500 12	20.6398	1.08354	0.742954	0.0524976	0.0359957	3.76494e-06	3.19173e-06	0.0598767	0.0293694	-0.110133	-0.310641
	MudTank 13	20.5352	1.07799	0.739208	0.0524943	0.0359969	3.97674e-06	3.37284e-06
	91500 13	20.538	1.07836	0.739481	0.0525049	0.0360053	2.88349e-06	2.47917e-06	0.139684	0.205942	-0.0303399	-0.134128
	MudTank 14	20.1298	1.05684	0.724652	0.0525009	0.0359988	3.1694e-06	2.30692e-06
	91500 14	20.8339	1.0939	0.750169	0.0525056	0.036007	3.15481e-06	2.47719e-06	0.0822417	0.205446	-0.0877723	-0.134624
	MudTank 15	20.1943	1.06024	0.727006	0.0525016	0.0360003	3.11369e-06	2.57587e-06
	91500 15	20.6601	1.08472	0.743809	0.0525029	0.0360019	3.24779e-06	2.70393e-06	0.0212987	0.0280765	-0.148705	-0.311933
	MudTank 16	20.148	1.05782	0.72537	0.0525019	0.0360015	3.58615e-06	3.05223e-06
	91500 16	20.4913	1.07595	0.737816	0.0525074	0.0360061	2.93113e-06	2.68855e-06	0.0663155	0.0785825	-0.103696	-0.261444
	MudTank 17	19.8157	1.04045	0.713472	0.0525058	0.036005	3.66513e-06	2.73962e-06
Session 3 (2021-1-15)	MudTank 01	20.1999	1.06104	0.727934	0.0525268	0.0360362	3.45369e-06	2.88114e-06
	91500 01	20.7107	1.08792	0.746488	0.0525292	0.0360432	3.82519e-06	2.65879e-06	0.0672125	0.1936	-0.102799	-0.146466
	MudTank 02	20.6531	1.0848	0.744267	0.0525245	0.0360362	4.05327e-06	3.18434e-06
	91500 02	20.7379	1.08939	0.747481	0.0525311	0.0360439	3.75449e-06	2.63888e-06	0.12867	0.180581	-0.0413516	-0.15948
	MudTank 03	20.6502	1.08464	0.744208	0.0525241	0.0360385	3.36002e-06	2.52827e-06
	91500 03	20.399	1.07151	0.735194	0.0525269	0.0360399	4.14303e-06	3.61956e-06	0.00855425	0.0755433	-0.161447	-0.264482
	MudTank 04	20.1988	1.06102	0.727888	0.0525287	0.0360359	3.08706e-06	2.60098e-06
	91500 04	20.6621	1.08527	0.744583	0.0525246	0.0360358	3.03264e-06	3.05606e-06	-0.0228831	0.0401107	-0.192879	-0.299903
	MudTank 05	20.2078	1.06138	0.728151	0.052523	0.0360329	3.08702e-06	3.09763e-06
	91500 05	20.7719	1.09106	0.748552	0.0525257	0.0360364	2.83063e-06	3.10159e-06	0.0641387	0.114962	-0.105872	-0.225077
	MudTank 06	19.9777	1.04927	0.719839	0.0525217	0.0360317	3.86253e-06	3.11307e-06
	91500 06	20.4468	1.07395	0.736768	0.0525236	0.0360328	3.06492e-06	3.05814e-06	0.0252991	0.0462315	-0.144705	-0.293784
	MudTank 07	20.2334	1.06272	0.729026	0.0525227	0.0360306	3.75326e-06	2.74777e-06
	91500 07	20.6219	1.08312	0.743043	0.0525224	0.0360314	3.63077e-06	2.99235e-06	0.037156	0.108593	-0.13285	-0.231444
	MudTank 08	20.0334	1.05212	0.721696	0.0525182	0.0360244	3.51328e-06	3.2063e-06
	91500 08	20.3495	1.06878	0.733219	0.0525212	0.0360311	3.02553e-06	2.5382e-06	0.0705435	0.137156	-0.0994685	-0.202891
	MudTank 09	20.0751	1.05428	0.72327	0.0525167	0.0360279	3.28017e-06	2.70629e-06
	91500 09	19.9597	1.04821	0.718987	0.0525159	0.0360216	3.5493e-06	2.94484e-06	-0.00977127	-0.104736	-0.17977	-0.4447
	MudTank 10	20.065	1.05374	0.722804	0.0525161	0.0360229	3.6338e-06	2.98841e-06
	91500 10	20.1633	1.05893	0.726376	0.0525175	0.0360243	3.26146e-06	2.55962e-06	0.0548621	0.124588	-0.115147	-0.215454
	MudTank 11	19.9416	1.0472	0.718237	0.0525131	0.0360168	4.11138e-06	2.9239e-06
	91500 11	20.1579	1.05864	0.726131	0.0525169	0.0360218	3.40623e-06	2.98078e-06	0.0765917	0.145362	-0.0934213	-0.194687
	MudTank 12	19.6937	1.03417	0.709301	0.0525126	0.0360163	3.63084e-06	3.03849e-06
	91500 12	19.943	1.04742	0.718366	0.0525199	0.0360203	4.15303e-06	3.28615e-06	0.170612	0.146103	0.00058267	-0.193947
	MudTank 13	19.7021	1.03455	0.70955	0.0525092	0.0360136	4.05167e-06	3.12953e-06
	91500 13	19.938	1.04703	0.71807	0.052514	0.0360148	4.12272e-06	3.32702e-06	0.0968993	0.082507	-0.0731172	-0.257521
	MudTank 14	19.722	1.03558	0.710192	0.0525086	0.0360101	3.74491e-06	2.73319e-06
	91500 14	19.6083	1.02974	0.706186	0.052515	0.0360142	3.84303e-06	3.39323e-06	0.139451	0.164719	-0.0305731	-0.175337
	MudTank 15	19.512	1.02451	0.702563	0.0525068	0.0360066	3.71026e-06	2.99524e-06
	91500 15	19.4529	1.02155	0.700663	0.0525138	0.0360181	3.55891e-06	3.01195e-06	0.093778	0.2572	-0.0762379	-0.0828874
	MudTank 16	19.3146	1.01423	0.695549	0.052511	0.0360112	3.61767e-06	3.13965e-06
	91500 16	19.4966	1.02385	0.70218	0.0525138	0.0360152	3.91583e-06	2.92116e-06	0.0783936	0.144398	-0.0916197	-0.195651
	MudTank 17	19.398	1.01856	0.6985	0.0525084	0.0360088	3.8719e-06	2.48996e-06
