# Supplementary material for: Further characterization of SA01 and SA02 zircon reference materials for Si and Zr isotopic compositions via femtosecond laser ablation MC-ICP-MS
Source: Royal Society of Chemistry journal article supplement (doi:10.1039/d1ja00160d), 2021-01-01
Supplement: d1ja00160d2.xlsx [file d1ja00160d2.xlsx]

## Sheet: SA01_LA
LA-MC-ICP-MS Zr isotopic data for SA01 zircon ( Mud Tank zircon used as Reference material)
Shard	Session	Sample	89Y	90Zr	91Zr	92Zr	94Zr	95Mo	96Zr	91/90	92/90	94/90	96/90	94/91	91/90(se)	92/90(se)	94/90(se)	96/90(se)	94/91(se)	δ91/90	δ92/90	δ94/90	δ96/90	δ94/90IPGP-Zr
Shard 1	1 (2021-3-27)	MudTank 01	0.193052	28.5464	6.29928	9.75271	10.1293	4.407e-06	1.66916	0.220668	0.341644	0.354836	0.0584719	1.60801	3.68014e-06	6.48784e-06	1.26264e-05	2.53977e-06	4.22857e-05
		SA01 01	0.0933708	26.5564	5.86027	9.07325	9.4235	9.10904e-06	1.55293	0.220672	0.341659	0.354848	0.0584763	1.60803	4.4059e-06	6.56803e-06	1.34336e-05	2.50595e-06	4.16286e-05	0.026184	0.0264582	0.0115025	0.0378982	0.0415028
		MudTank 02	0.193011	28.4762	6.28369	9.72904	10.1048	4.61406e-06	1.66518	0.220665	0.341655	0.354851	0.0584763	1.6081	3.96428e-06	5.61935e-06	1.23178e-05	2.55788e-06	3.68047e-05
		SA01 02	0.0944511	26.3884	5.82314	9.01586	9.36384	9.11043e-07	1.54316	0.220671	0.34166	0.354847	0.0584787	1.60804	3.31853e-06	5.96867e-06	1.09704e-05	2.08455e-06	3.78966e-05	-0.000295647	0.00613851	-0.0148235	0.0690141	0.0151761
		MudTank 03	0.195728	28.9409	6.38659	9.888	10.2698	1.27851e-05	1.69226	0.220677	0.341662	0.354854	0.058473	1.60803	3.39397e-06	5.7358e-06	1.08251e-05	2.38464e-06	3.35229e-05
		SA01 03	0.0931605	27.4386	6.05501	9.37468	9.7368	1.79617e-05	1.60459	0.220675	0.34166	0.354858	0.0584793	1.60806	3.47918e-06	5.61272e-06	1.10919e-05	2.12659e-06	3.56672e-05	-0.00178163	0.0022428	0.02941	0.124593	0.0594109
		MudTank 04	0.193669	28.7781	6.35056	9.83222	10.2116	1.93015e-05	1.68268	0.220674	0.341657	0.35484	0.0584711	1.60799	3.60526e-06	6.70124e-06	1.28041e-05	2.89009e-06	4.20785e-05
		SA01 04	0.0900611	26.7157	5.89528	9.12745	9.48003	1.67502e-05	1.56227	0.220667	0.341651	0.354848	0.0584776	1.60807	3.7779e-06	6.27962e-06	1.18274e-05	2.56516e-06	3.94638e-05	-0.0140873	-0.00683354	0.0194294	0.0865823	0.04943
		MudTank 05	0.194168	29.2298	6.45003	9.98634	10.372	1.12177e-05	1.70918	0.220666	0.341649	0.354842	0.058474	1.60805	2.80705e-06	5.45445e-06	1.15256e-05	2.7041e-06	4.27228e-05
		SA01 05	0.0910464	26.9632	5.95005	9.21238	9.56826	5.20454e-06	1.57678	0.220673	0.341665	0.354864	0.058479	1.6081	3.8458e-06	7.07352e-06	1.40797e-05	2.68719e-06	4.30501e-05	0.0339447	0.0243376	0.0467086	0.0730702	0.07671
		MudTank 06	0.180972	28.4852	6.28568	9.73234	10.108	2.19802e-05	1.66568	0.220665	0.341664	0.354853	0.0584755	1.60811	4.14344e-06	5.55757e-06	1.19645e-05	2.60047e-06	3.57029e-05
		SA01 06	0.0915793	26.4887	5.84534	9.05056	9.40018	1.89796e-05	1.54906	0.220673	0.341676	0.354874	0.05848	1.60815	3.42446e-06	6.57759e-06	1.33022e-05	2.9673e-06	4.7513e-05	0.0336047	0.0709472	0.110185	0.131194	0.140188
		MudTank 07	0.193663	28.8738	6.37145	9.86443	10.2449	1.75145e-05	1.68822	0.220666	0.34164	0.354816	0.0584692	1.60794	3.15634e-06	5.2766e-06	1.00458e-05	2.30933e-06	3.60926e-05
		SA01 07	0.0907555	26.7805	5.90968	9.14988	9.50354	1.02329e-05	1.56609	0.220671	0.341663	0.354868	0.0584787	1.60813	3.85449e-06	6.51529e-06	1.22605e-05	2.59427e-06	3.78584e-05	0.0110682	0.0349829	0.0716675	0.11058	0.10167
		MudTank 08	0.189207	28.3598	6.25822	9.68944	10.064	1.7131e-05	1.65834	0.220672	0.341662	0.354869	0.0584752	1.60813	3.69396e-06	5.84736e-06	1.1659e-05	2.66179e-06	3.68122e-05
		SA01 08	0.0891247	27.0322	5.96538	9.23637	9.59353	-1.3125e-06	1.58093	0.220677	0.34168	0.354893	0.0584834	1.6082	3.54414e-06	5.71094e-06	1.13737e-05	2.46246e-06	3.9616e-05	0.0158289	0.0484647	0.0677551	0.121716	0.0977572
		MudTank 09	0.178457	28.2993	6.24494	9.66891	10.0425	5.37207e-06	1.65487	0.220674	0.341666	0.354868	0.0584773	1.60811	3.79952e-06	7.52593e-06	1.42746e-05	3.19886e-06	4.49497e-05
		SA01 09	0.0887958	26.8863	5.93301	9.18628	9.54105	1.10438e-05	1.57225	0.220671	0.341672	0.354867	0.058478	1.60813	3.62378e-06	6.65699e-06	1.21746e-05	2.20455e-06	4.0116e-05	-0.00729413	0.00344644	-0.00807307	0.0396848	0.0219267
		MudTank 10	0.197862	28.7605	6.34658	9.82675	10.2063	-2.29666e-06	1.68174	0.22067	0.341676	0.354872	0.058474	1.60815	3.9866e-06	6.83767e-06	1.41308e-05	3.11982e-06	4.39483e-05
		SA01 10	0.0869462	26.5044	5.84896	9.05601	9.40581	1.15803e-05	1.54992	0.220678	0.341679	0.354877	0.0584779	1.60812	3.488e-06	6.35585e-06	1.28619e-05	2.7214e-06	4.20752e-05	0.0229532	0.0296359	0.0353034	0.112906	0.0653044
		MudTank 11	0.194783	28.7872	6.35265	9.83549	10.2153	7.53515e-06	1.68314	0.220676	0.341662	0.354856	0.0584685	1.60804	3.44243e-06	6.28533e-06	1.37929e-05	2.92622e-06	4.55755e-05
		SA01 11	0.0888317	26.6778	5.88705	9.11504	9.46748	9.02176e-06	1.55999	0.220673	0.341672	0.354883	0.0584752	1.60819	3.81904e-06	6.36476e-06	1.25565e-05	2.54718e-06	3.85816e-05	-0.00619737	0.0120591	0.0441448	0.0288555	0.0741462
		MudTank 12	0.186737	27.8081	6.13647	9.50131	9.86851	1.26915e-05	1.62618	0.220672	0.341674	0.354878	0.0584785	1.60817	3.8281e-06	6.39486e-06	1.27334e-05	2.5683e-06	3.84161e-05
		SA01 12	0.106796	25.7608	5.68474	8.80199	9.14232	1.21415e-05	1.50658	0.220674	0.341681	0.354892	0.0584834	1.60822	3.35526e-06	6.53077e-06	1.23536e-05	2.37049e-06	3.99296e-05	-0.00105477	0.017592	0.0334026	0.110298	0.0634036
		MudTank 13	0.188538	28.0512	6.19026	9.58444	9.95486	1.29551e-06	1.6403	0.220677	0.341677	0.354882	0.0584754	1.60815	3.36499e-06	5.675e-06	1.04125e-05	2.56148e-06	3.20553e-05
		SA01 13	0.113821	25.4677	5.62011	8.70184	9.0385	1.06825e-05	1.48951	0.220676	0.341682	0.3549	0.0584864	1.60824	3.47789e-06	6.32916e-06	1.22046e-05	2.37624e-06	4.34474e-05	0.00234872	0.002631	0.0375662	0.129523	0.0675673
		MudTank 14	0.184163	27.6435	6.1002	9.44537	9.81045	-2.05533e-06	1.61666	0.220674	0.341685	0.354892	0.0584823	1.60822	3.68741e-06	6.50496e-06	1.32715e-05	2.67754e-06	4.50439e-05
		SA01 14	0.0873635	25.8057	5.69468	8.81727	9.15814	2.12572e-05	1.50905	0.220675	0.341679	0.354887	0.0584772	1.60819	3.66898e-06	6.16258e-06	1.26362e-05	2.59105e-06	4.08244e-05	0.00482425	-0.0220363	-0.0386582	-0.0717394	-0.00865937
		MudTank 15	0.17521	27.659	6.10363	9.45075	9.81648	6.4962e-06	1.61751	0.220674	0.341687	0.35491	0.0584804	1.6083	3.58512e-06	4.78172e-06	1.03072e-05	2.0906e-06	3.64202e-05
		SA01 15	0.0865414	26.256	5.79405	8.97109	9.31814	7.93661e-06	1.53544	0.220675	0.341678	0.354896	0.0584798	1.60823	3.47771e-06	5.7194e-06	1.15635e-05	2.27215e-06	3.88902e-05	0.00322761	-0.00508568	-0.0421152	-0.0194632	-0.0121165
		MudTank 16	0.186176	27.3879	6.04385	9.35771	9.72031	4.84908e-06	1.60169	0.220676	0.341673	0.354912	0.0584815	1.6083	3.44711e-06	6.17011e-06	1.06496e-05	2.564e-06	3.4859e-05
		SA01 16	0.0874494	25.44	5.61404	8.69254	9.029	2.11645e-06	1.48778	0.220677	0.341687	0.354912	0.0584817	1.60829	3.57895e-06	5.11251e-06	1.23047e-05	2.52472e-06	4.17044e-05	0.00427492	0.0201314	0.00682536	0.00469239	0.0368256
		MudTank 17	0.187478	27.4258	6.05223	9.37105	9.73361	1.04549e-05	1.60389	0.220677	0.341688	0.354908	0.0584813	1.60827	3.54463e-06	6.81841e-06	1.378e-05	2.60535e-06	4.9765e-05
		SA01 17	0.111384	25.134	5.54657	8.58791	8.92033	2.12035e-05	1.46989	0.22068	0.341684	0.35491	0.058482	1.60826	3.78986e-06	5.76069e-06	1.12726e-05	2.52871e-06	3.59469e-05	0.0149803	0.00657433	0.0228978	0.0278251	0.0528985
		MudTank 18	0.184205	27.4332	6.05384	9.37326	9.73592	5.37893e-06	1.60427	0.220676	0.341676	0.354896	0.0584794	1.60822	3.61476e-06	6.01104e-06	1.12325e-05	2.49646e-06	3.66048e-05
	2 (2021-3-27)	MudTank 01	0.18184	27.1856	5.99923	9.2888	9.64812	2.25101e-05	1.58971	0.220676	0.341681	0.354897	0.0584759	1.60822	3.53042e-06	5.95876e-06	1.19794e-05	2.16814e-06	3.8691e-05
		SA01 01	0.0898995	25.864	5.70755	8.8373	9.17943	1.28052e-05	1.5125	0.220676	0.341683	0.354912	0.0584791	1.6083	4.00774e-06	5.70055e-06	1.11196e-05	2.39511e-06	3.23678e-05	0.0066178	0.0164046	0.066353	0.106985	0.096355
		MudTank 02	0.181753	27.0574	5.97082	9.24485	9.60212	-3.81292e-07	1.58204	0.220672	0.341675	0.354879	0.0584699	1.60817	3.88247e-06	6.85083e-06	1.15706e-05	2.31115e-06	3.84874e-05
		SA01 02	0.0810774	25.4748	5.62172	8.7042	9.04116	1.22022e-05	1.48982	0.220678	0.34168	0.354907	0.0584824	1.60825	4.09153e-06	6.60057e-06	1.38673e-05	2.27406e-06	4.42794e-05	0.0207497	0.00469533	0.0682321	0.19224	0.0982341
		MudTank 03	0.180248	26.9228	5.9412	9.19902	9.55454	1.07292e-05	1.57425	0.220675	0.341681	0.354886	0.0584725	1.60818	3.69333e-06	5.10715e-06	1.12128e-05	2.15913e-06	3.48181e-05
		SA01 03	0.0849545	25.5254	5.63287	8.72158	9.059	4.9492e-06	1.49262	0.220676	0.341682	0.354901	0.0584756	1.60824	3.71019e-06	6.50641e-06	1.115e-05	2.36068e-06	3.80535e-05	-0.00250734	-0.000593172	0.00122504	0.0048503	0.0312251
		MudTank 04	0.177249	26.6106	5.87241	9.0924	9.44448	1.08227e-05	1.55613	0.220679	0.341683	0.354915	0.0584781	1.60829	3.19836e-06	6.73686e-06	1.20921e-05	2.86482e-06	4.29902e-05
		SA01 04	0.0862187	25.1505	5.55017	8.59336	8.92586	-1.06772e-07	1.47067	0.220679	0.341678	0.354898	0.0584751	1.60821	3.56205e-06	4.84566e-06	1.14857e-05	2.29426e-06	3.98492e-05	0.00867384	-0.0139476	-0.0337865	-0.0247521	-0.00378754
		MudTank 05	0.173785	26.3442	5.81349	9.00134	9.34969	7.1525e-06	1.54047	0.220674	0.341682	0.354905	0.0584749	1.60828	3.97147e-06	5.82882e-06	1.11916e-05	2.44164e-06	3.38522e-05
		SA01 05	0.0790551	25.0329	5.52413	8.55312	8.88397	1.53834e-05	1.46377	0.220675	0.341676	0.354892	0.0584739	1.60821	3.66424e-06	6.82557e-06	1.29385e-05	2.45092e-06	4.2661e-05	-0.00337666	-0.00524849	-0.0290002	-0.00120553	0.00099896
		MudTank 06	0.16641	26.3867	5.82293	9.01559	9.36459	1.19898e-06	1.5429	0.220677	0.341673	0.354899	0.058473	1.60823	3.33587e-06	5.96519e-06	1.23123e-05	2.55105e-06	4.12092e-05
		SA01 06	0.0767901	24.7556	5.46295	8.45851	8.78593	4.75576e-07	1.44762	0.220675	0.34168	0.354906	0.0584765	1.60828	3.76811e-06	6.22904e-06	1.1839e-05	2.43763e-06	3.64366e-05	-0.00881486	0.00451182	0.0155464	0.0588118	0.0455469
		MudTank 07	0.17523	26.2611	5.79521	8.97301	9.32012	1.82908e-06	1.53557	0.220677	0.341684	0.354902	0.0584731	1.60825	3.87168e-06	6.5701e-06	1.24584e-05	2.53621e-06	3.99782e-05
		SA01 07	0.0776613	25.1187	5.54304	8.58245	8.91412	-6.26019e-06	1.46872	0.220674	0.341676	0.35488	0.0584711	1.60816	3.57101e-06	5.97685e-06	1.16181e-05	2.2071e-06	3.83339e-05	-0.00943988	-0.0152492	-0.0531354	-0.0234026	-0.023137
		MudTank 08	0.174588	26.2941	5.80246	8.98411	9.33162	2.27644e-05	1.53746	0.220675	0.341678	0.354895	0.0584718	1.60822	3.62611e-06	6.11287e-06	1.21683e-05	2.74751e-06	3.82876e-05
		SA01 08	0.0838726	25.1931	5.55961	8.608	8.9411	1.32163e-05	1.47312	0.220679	0.34168	0.354902	0.0584731	1.60822	4.13621e-06	6.03555e-06	1.19778e-05	2.2818e-06	3.75473e-05	0.0256278	0.000240922	0.0142407	0.0421814	0.0442412
		MudTank 09	0.164139	26.1499	5.77055	8.93495	9.28054	3.95867e-06	1.52897	0.220672	0.341682	0.354899	0.0584695	1.60826	3.24534e-06	6.22737e-06	1.25446e-05	2.54939e-06	4.24896e-05
		SA01 09	0.0861882	25.2541	5.57311	8.62888	8.96282	6.93843e-06	1.47667	0.220682	0.341683	0.354907	0.058473	1.60823	3.72444e-06	5.89141e-06	1.34368e-05	2.98224e-06	4.40503e-05	0.0351285	-0.00293401	-0.0051859	0.0290308	0.0248139
		MudTank 10	0.178392	26.0931	5.7581	8.91564	9.26093	6.71097e-06	1.52574	0.220675	0.341686	0.354919	0.0584731	1.60833	3.55695e-06	6.80774e-06	1.18443e-05	2.40304e-06	3.80805e-05
		SA01 10	0.0844663	24.9048	5.49581	8.50952	8.83874	1.25778e-05	1.45633	0.220673	0.341683	0.354902	0.0584761	1.60827	3.87018e-06	6.60025e-06	1.27222e-05	2.38057e-06	4.04217e-05	-0.0119371	-0.0068166	-0.0454585	0.0491237	-0.0154598
		MudTank 11	0.174118	25.9113	5.71799	8.85347	9.19635	8.27811e-06	1.51512	0.220676	0.341684	0.354917	0.0584733	1.60832	3.60604e-06	6.07741e-06	1.14233e-05	2.35436e-06	3.82786e-05
		SA01 11	0.0830328	24.7074	5.45236	8.44205	8.76865	9.6379e-06	1.44467	0.220678	0.341681	0.3549	0.058471	1.60823	4.17178e-06	5.83049e-06	1.24116e-05	2.2617e-06	3.94031e-05	0.000189479	-0.00379277	-0.0463958	-0.0440735	-0.0163972
		MudTank 12	0.172659	25.7365	5.67952	8.79367	9.13429	-4.21239e-07	1.5049	0.22068	0.341681	0.354917	0.0584738	1.60829	3.1593e-06	6.70319e-06	1.23872e-05	2.55588e-06	4.40195e-05
		SA01 12	0.0793407	24.4556	5.39687	8.35588	8.67939	5.4192e-08	1.43005	0.22068	0.341675	0.354903	0.0584753	1.60823	3.98539e-06	5.61138e-06	1.12841e-05	2.18864e-06	3.61149e-05	-0.00242556	-0.0274894	-0.0257476	0.0405526	0.00425167
		MudTank 13	0.171986	25.7708	5.68713	8.80554	9.14624	2.46592e-06	1.50687	0.220681	0.341687	0.354908	0.058472	1.60824	3.61291e-06	6.62591e-06	1.18896e-05	2.56418e-06	4.05333e-05
		SA01 13	0.0858925	24.4517	5.39583	8.35475	8.678	4.81662e-06	1.42978	0.220673	0.341683	0.354902	0.0584736	1.60828	4.35872e-06	6.39006e-06	1.21064e-05	2.16201e-06	3.51704e-05	-0.0296731	0.001703	0.00728154	0.036691	0.0372818
		MudTank 14	0.170949	25.7497	5.68237	8.79809	9.13835	1.35364e-05	1.5056	0.220677	0.341677	0.354892	0.0584709	1.6082	4.07283e-06	6.69618e-06	1.41696e-05	3.03775e-06	4.60656e-05
		SA01 14	0.0778282	24.6257	5.43419	8.41426	8.73981	-9.16845e-07	1.43992	0.220672	0.341687	0.354908	0.0584726	1.60831	4.29631e-06	5.6991e-06	1.23715e-05	2.32838e-06	3.53873e-05	-0.022982	0.0321443	0.0412405	0.0332249	0.0712418
		MudTank 15	0.160683	25.4562	5.6176	8.69775	9.03426	1.06753e-05	1.48844	0.220677	0.341675	0.354894	0.0584704	1.60821	4.46887e-06	6.93896e-06	1.33751e-05	2.5608e-06	4.03135e-05
		SA01 15	0.0771719	24.7583	5.46353	8.45939	8.78668	7.12525e-06	1.44765	0.220675	0.34168	0.354899	0.0584712	1.60824	3.92666e-06	6.62793e-06	1.34475e-05	2.46019e-06	4.37826e-05	-0.0190458	0.00367744	0.000649457	-0.00440624	0.0306495
		MudTank 16	0.172089	25.4928	5.62578	8.71043	9.04746	6.9321e-06	1.49063	0.220681	0.341682	0.354903	0.0584726	1.60822	4.14507e-06	6.15722e-06	1.22445e-05	2.53231e-06	3.78083e-05
		SA01 16	0.0756598	24.1267	5.32419	8.24349	8.5624	6.577e-06	1.41074	0.220676	0.341675	0.354893	0.0584721	1.60821	3.9163e-06	6.14258e-06	1.3053e-05	2.1711e-06	4.32761e-05	-0.0223061	-0.0207563	-0.0405217	0.00197871	-0.0105229
		MudTank 17	0.174059	25.6001	5.64945	8.7471	9.08579	1.76944e-05	1.49687	0.220681	0.341682	0.354912	0.0584713	1.60826	3.38534e-06	5.7958e-06	1.14862e-05	2.54247e-06	3.93616e-05
		SA01 17	0.0766278	23.9028	5.27488	8.16735	8.48382	2.19699e-06	1.39778	0.22068	0.34169	0.354929	0.0584777	1.60834	3.4886e-06	5.11828e-06	9.93162e-06	1.88644e-06	3.59708e-05	0.0008283	0.00455972	0.0597288	0.0968968	0.0897306
		MudTank 18	0.171526	25.6047	5.65042	8.74897	9.0872	1.18543e-05	1.49717	0.220679	0.341694	0.354904	0.0584727	1.60823	3.86021e-06	6.20587e-06	1.18325e-05	2.62948e-06	3.6911e-05
	3 (2021-3-27)	MudTank 01	0.166048	25.1799	5.55655	8.60342	8.93633	-3.39537e-06	1.47231	0.220674	0.341678	0.354898	0.0584716	1.60825	3.4837e-06	6.20667e-06	1.13857e-05	2.29579e-06	4.06954e-05
		SA01 01	0.0809036	24.7552	5.46294	8.45848	8.78576	1.2892e-05	1.4474	0.220679	0.341686	0.354906	0.0584687	1.60825	3.62221e-06	5.72225e-06	1.21755e-05	2.67741e-06	3.91682e-05	0.00678379	0.00872406	0.018859	-0.0517546	0.0488596
		MudTank 02	0.166652	25.0172	5.52079	8.54805	8.87861	1.42131e-06	1.4628	0.22068	0.341688	0.354901	0.0584719	1.60821	4.09685e-06	6.84894e-06	1.29216e-05	2.75521e-06	3.7716e-05
		SA01 02	0.072966	24.4852	5.40327	8.36616	8.68988	3.72441e-06	1.43162	0.220675	0.341682	0.354903	0.0584686	1.60826	3.35769e-06	5.98901e-06	1.20175e-05	2.21157e-06	3.88265e-05	-0.0158626	0.00477908	0.0242673	-0.0717886	0.054268
		MudTank 03	0.161306	24.9053	5.49602	8.50948	8.8386	9.95228e-06	1.45631	0.220677	0.341674	0.354888	0.0584738	1.60818	3.75066e-06	6.27841e-06	1.20364e-05	3.00205e-06	4.34844e-05
		SA01 03	0.0762592	24.6305	5.43553	8.41594	8.74169	1.47943e-05	1.44022	0.220683	0.341689	0.354914	0.0584731	1.60825	3.37451e-06	6.0164e-06	1.1461e-05	2.09134e-06	4.28218e-05	0.0208381	0.0310419	0.0289791	0.00593359	0.05898
		MudTank 04	0.157371	24.9401	5.50378	8.5216	8.85173	6.14875e-06	1.45829	0.22068	0.341683	0.35492	0.0584717	1.6083	3.70224e-06	5.86765e-06	1.20059e-05	2.46637e-06	4.14061e-05
		SA01 04	0.0810811	24.6113	5.43109	8.40894	8.7341	1.18606e-06	1.43898	0.220674	0.34167	0.354882	0.0584681	1.60817	3.88779e-06	6.09118e-06	1.19091e-05	2.53869e-06	3.86299e-05	-0.0318681	-0.0439317	-0.107251	-0.0660362	-0.0772537
		MudTank 05	0.157548	24.8086	5.47484	8.47677	8.80505	1.1539e-05	1.45061	0.220683	0.341687	0.354919	0.0584722	1.60828	3.35811e-06	5.58134e-06	1.07309e-05	2.58926e-06	3.9213e-05
		SA01 05	0.0809877	24.395	5.38339	8.33518	8.65754	1.79084e-05	1.42634	0.220675	0.341675	0.35489	0.0584686	1.6082	3.87336e-06	6.62988e-06	1.28817e-05	2.50978e-06	4.43755e-05	-0.0197005	-0.0260912	-0.059402	-0.0409323	-0.0294038
		MudTank 06	0.155907	24.6823	5.4468	8.43349	8.75979	-2.9133e-06	1.44316	0.220677	0.341682	0.354902	0.0584698	1.60825	3.66567e-06	6.07475e-06	1.22809e-05	2.81424e-06	3.83343e-05
		SA01 06	0.0691287	24.1793	5.33559	8.26122	8.58045	1.22625e-05	1.41357	0.220668	0.341664	0.354867	0.0584621	1.60815	4.20038e-06	7.59979e-06	1.43599e-05	2.64161e-06	4.87585e-05	-0.0344078	-0.0372023	-0.070748	-0.111505	-0.0407501
		MudTank 07	0.155823	24.7655	5.4651	8.46168	8.78883	2.05475e-05	1.44797	0.220674	0.341672	0.354881	0.0584674	1.60817	3.76311e-06	6.32182e-06	1.10718e-05	2.1174e-06	3.55647e-05
		SA01 07	0.0694124	24.0781	5.31343	8.22671	8.54498	7.4469e-06	1.40779	0.220675	0.341668	0.354886	0.0584677	1.60818	3.68149e-06	6.8356e-06	1.28925e-05	2.76427e-06	4.2651e-05	0.00790306	-0.025427	-0.00589485	-0.0202148	0.024105
		MudTank 08	0.158756	24.8055	5.4739	8.47557	8.80334	-5.21638e-06	1.45039	0.220673	0.341681	0.354895	0.0584704	1.60824	3.33642e-06	5.44892e-06	1.05406e-05	2.15961e-06	3.60785e-05
		SA01 08	0.0781534	24.0858	5.31502	8.22941	8.54761	1.44002e-05	1.40821	0.22067	0.34167	0.354881	0.0584662	1.6082	3.62321e-06	5.67712e-06	1.13998e-05	2.59326e-06	3.93252e-05	-0.0200365	-0.0437248	-0.0655488	-0.054179	-0.0355508
		MudTank 09	0.155222	24.5186	5.41066	8.37773	8.70198	1.63551e-05	1.43356	0.220676	0.341689	0.354914	0.0584684	1.6083	3.75832e-06	6.58691e-06	1.15728e-05	2.27144e-06	4.06696e-05
		SA01 09	0.078336	24.3428	5.372	8.31716	8.63874	-1.50797e-05	1.42314	0.220681	0.341668	0.354879	0.0584626	1.60811	3.47784e-06	6.05508e-06	1.30063e-05	2.46533e-06	4.36653e-05	0.0284647	-0.0320907	-0.0562248	-0.065776	-0.0262265
		MudTank 10	0.165644	24.7121	5.45332	8.44338	8.76993	-6.84962e-06	1.44478	0.220674	0.34167	0.354885	0.0584646	1.60818	3.24966e-06	5.83211e-06	1.19847e-05	2.48562e-06	3.8678e-05
		SA01 10	0.0774395	24.355	5.3745	8.32133	8.64314	5.78727e-06	1.42383	0.220674	0.341668	0.354881	0.0584613	1.60817	4.18017e-06	5.72065e-06	1.22147e-05	2.3633e-06	3.67789e-05	0.0129974	-0.00513201	-0.0171751	-0.0807725	0.0128244
		MudTank 11	0.162265	24.357	5.3748	8.32207	8.64408	4.92275e-06	1.42409	0.220667	0.34167	0.35489	0.0584676	1.60826	3.85299e-06	6.10983e-06	1.32492e-05	2.6207e-06	4.53281e-05
		SA01 11	0.0766941	24.3931	5.38288	8.33452	8.65685	2.78028e-06	1.42616	0.220672	0.341675	0.35489	0.058466	1.60822	3.87736e-06	7.32597e-06	1.25292e-05	2.44339e-06	4.07208e-05	0.0107556	0.0189082	0.0129639	0.00914571	0.0429643
		MudTank 12	0.160578	24.2306	5.34703	8.2788	8.59893	3.82493e-06	1.4166	0.220673	0.341668	0.35488	0.0584633	1.60817	3.96322e-06	6.82815e-06	1.50203e-05	2.95343e-06	5.07837e-05
		SA01 12	0.0741698	24.0137	5.29924	8.20475	8.52211	4.3603e-06	1.4039	0.220676	0.34167	0.354887	0.0584629	1.60818	4.07713e-06	6.59773e-06	1.27525e-05	2.61645e-06	3.76752e-05	0.0080189	-0.000678202	-0.00202146	-0.0436949	0.0279785
		MudTank 13	0.152778	24.4515	5.39586	8.35444	8.67773	-2.03588e-06	1.42962	0.220676	0.341674	0.354895	0.0584675	1.60822	3.86767e-06	7.22469e-06	1.33573e-05	2.52506e-06	4.11877e-05
		SA01 13	0.0791066	23.7386	5.23863	8.11092	8.42467	-1.95549e-05	1.38792	0.22068	0.341677	0.354893	0.0584668	1.60818	2.91446e-06	5.51402e-06	1.12237e-05	2.0714e-06	4.36491e-05	0.0207995	0.0115954	-0.00163625	0.0463849	0.0283637
		MudTank 14	0.139317	24.4765	5.40135	8.36293	8.6865	1.25781e-05	1.43091	0.220675	0.341672	0.354892	0.0584606	1.60821	4.14755e-06	6.83531e-06	1.26038e-05	2.3609e-06	3.93329e-05
		SA01 14	0.0723602	23.8965	5.27327	8.16449	8.48002	1.88121e-07	1.39702	0.220671	0.341661	0.354864	0.0584612	1.60811	3.99954e-06	6.52191e-06	1.23373e-05	2.57672e-06	4.15809e-05	-0.0134673	-0.0266216	-0.043514	-0.00195883	-0.0135153
		MudTank 15	0.136729	23.6249	5.21338	8.07185	8.38371	5.29888e-06	1.38116	0.220673	0.341668	0.354868	0.058462	1.60811	3.47021e-06	5.02609e-06	9.18708e-06	1.84926e-06	3.14454e-05
		SA01 15	0.0774765	23.6934	5.22856	8.09536	8.40815	9.08207e-06	1.38511	0.220675	0.341671	0.354872	0.0584594	1.60812	3.69215e-06	6.24801e-06	1.30915e-05	2.68438e-06	4.35123e-05	0.0105178	0.0154369	-0.00461947	-0.0833008	0.0253804
		MudTank 16	0.162155	24.2761	5.35707	8.29426	8.61509	1.73463e-05	1.41934	0.220673	0.341664	0.35488	0.0584666	1.60817	4.07619e-06	7.20201e-06	1.24436e-05	2.49167e-06	4.07562e-05
		SA01 16	0.0683895	23.6271	5.2139	8.07275	8.38494	2.66723e-06	1.38131	0.220675	0.341674	0.354887	0.0584634	1.60819	4.03373e-06	8.28804e-06	1.43176e-05	2.69495e-06	4.5583e-05	0.0120895	0.0280514	0.0251772	0.00256422	0.0551779
		MudTank 17	0.160628	24.0781	5.31337	8.22666	8.54477	9.52393e-06	1.4076	0.220672	0.341666	0.354877	0.0584599	1.60817	4.68407e-06	7.10206e-06	1.39384e-05	2.88685e-06	4.24875e-05
		SA01 17	0.0787628	23.4261	5.16964	8.00437	8.3142	7.99045e-06	1.36971	0.220679	0.341686	0.354912	0.0584696	1.60828	4.32905e-06	6.77567e-06	1.1613e-05	2.6177e-06	3.53088e-05	0.0214546	0.0594413	0.0951441	0.139809	0.125147
		MudTank 18	0.160372	24.0964	5.31749	8.23296	8.55135	2.09226e-05	1.40875	0.220675	0.341667	0.35488	0.0584629	1.60815	3.67595e-06	6.14634e-06	1.08849e-05	2.28565e-06	3.4223e-05
Shard 2	4 (2021-3-27)	MudTank 01	0.160197	24.033	5.30319	8.21091	8.52765	-8.96007e-06	1.40477	0.220663	0.341652	0.354831	0.0584518	1.60802	3.16963e-06	5.25045e-06	1.05679e-05	1.98587e-06	3.72061e-05
		SA01 01	0.0697743	23.6602	5.221	8.08379	8.39607	-6.85784e-06	1.38318	0.220665	0.341661	0.354859	0.0584601	1.60813	3.87494e-06	6.28016e-06	1.03997e-05	2.05688e-06	3.50242e-05	-0.00396369	0.00929593	0.029762	0.0595155	0.0597629
		MudTank 02	0.159097	23.812	5.25458	8.13569	8.45007	2.78013e-06	1.39208	0.22067	0.341664	0.354867	0.0584615	1.60814	3.46376e-06	6.27067e-06	1.1417e-05	2.53624e-06	3.84961e-05
		SA01 02	0.0725402	23.3129	5.14431	7.96512	8.27287	6.28272e-06	1.36285	0.220663	0.341661	0.354862	0.058459	1.60816	4.44207e-06	5.83753e-06	1.27192e-05	2.48952e-06	3.73105e-05	-0.0133812	0.0127103	0.0113083	0.0489788	0.0413087
		MudTank 03	0.150534	23.8033	5.2525	8.13236	8.44656	-7.2049e-06	1.39132	0.220663	0.341649	0.354849	0.0584509	1.6081	4.29106e-06	6.30851e-06	1.24227e-05	2.70256e-06	4.19698e-05
		SA01 03	0.0675246	23.5429	5.1953	8.04379	8.35465	7.23979e-06	1.37635	0.220674	0.341666	0.35487	0.0584615	1.60812	3.72685e-06	6.2122e-06	1.17242e-05	2.45166e-06	3.7714e-05	0.022326	0.0106612	-0.00223487	0.060054	0.0277651
		MudTank 04	0.145623	23.4303	5.1705	8.00558	8.31526	6.54324e-06	1.36986	0.220675	0.341676	0.354893	0.0584651	1.60821	3.61143e-06	6.05955e-06	1.13791e-05	2.31633e-06	3.91721e-05
		SA01 04	0.0672383	22.9363	5.0614	7.83641	8.13928	4.64172e-06	1.34081	0.220672	0.34166	0.354864	0.0584581	1.60811	3.95294e-06	6.0587e-06	1.26595e-05	2.58793e-06	4.56253e-05	-0.00663309	-0.0393054	-0.0725145	-0.103287	-0.0425167
		MudTank 05	0.146104	23.4856	5.1826	8.02432	8.33471	1.59456e-05	1.37304	0.220672	0.341671	0.354887	0.0584631	1.60821	3.97701e-06	6.79651e-06	1.20936e-05	2.92567e-06	3.66089e-05
		SA01 05	0.0683428	23.0082	5.07718	7.8609	8.16456	-4.48456e-07	1.34498	0.220668	0.341657	0.354854	0.0584567	1.60809	4.48115e-06	7.18759e-06	1.36935e-05	2.79709e-06	4.40341e-05	-0.00916729	-0.0346697	-0.0827005	-0.0914869	-0.052703
		MudTank 06	0.150509	23.6285	5.21408	8.07308	8.3853	1.35755e-05	1.38135	0.220669	0.341666	0.35488	0.0584611	1.6082	3.75621e-06	6.72512e-06	1.33151e-05	2.49166e-06	4.45234e-05
		SA01 06	0.0732981	23.0487	5.08622	7.87492	8.17926	-7.90349e-07	1.34735	0.220673	0.341665	0.354869	0.0584568	1.60812	3.90573e-06	7.57358e-06	1.45283e-05	2.55268e-06	5.06373e-05	-0.00218251	-0.0122991	-0.0238932	-0.0631026	0.00610608
		MudTank 07	0.155499	23.4551	5.17604	8.01397	8.32366	4.84927e-06	1.37119	0.220678	0.341672	0.354876	0.0584599	1.60811	4.36514e-06	6.08496e-06	1.39632e-05	3.02256e-06	4.80478e-05
		SA01 07	0.0692494	22.6657	5.00159	7.74385	8.04336	-7.93522e-06	1.32494	0.220668	0.341655	0.354869	0.0584559	1.60816	4.1694e-06	6.60318e-06	1.35477e-05	2.75221e-06	4.26885e-05	-0.0285542	-0.0317137	-0.00353445	-0.065	0.0264654
		MudTank 08	0.148265	23.5822	5.20389	8.05709	8.36853	-1.64053e-06	1.3786	0.22067	0.34166	0.354866	0.0584594	1.60813	3.9893e-06	6.50753e-06	1.3204e-05	2.47737e-06	4.40936e-05
		SA01 08	0.0659923	22.8748	5.04774	7.81516	8.11699	-3.79065e-06	1.33716	0.220668	0.341649	0.354844	0.0584554	1.60804	4.57858e-06	6.2562e-06	1.31674e-05	2.64529e-06	3.71611e-05	-0.01813	-0.0366041	-0.06347	-0.0725157	-0.0334719
		MudTank 09	0.150054	23.6095	5.20998	8.06648	8.37821	-9.98465e-06	1.3802	0.220673	0.341663	0.354866	0.0584598	1.60811	4.01443e-06	7.0415e-06	1.32746e-05	2.81623e-06	4.24133e-05
		SA01 09	0.0671016	23.2204	5.124	7.93324	8.2397	7.9909e-06	1.35735	0.220668	0.341649	0.354846	0.0584548	1.60806	4.2324e-06	6.61093e-06	1.29331e-05	2.41012e-06	4.04544e-05	-0.019242	-0.0343084	-0.0493916	-0.0524543	-0.0193931
		MudTank 10	0.158925	23.6699	5.22325	8.08702	8.39951	1.02004e-05	1.38364	0.220671	0.341659	0.354861	0.058456	1.6081	3.99308e-06	7.39567e-06	1.49621e-05	3.38799e-06	4.84015e-05
		SA01 10	0.0660251	22.7499	5.02007	7.77262	8.07281	-1.85474e-06	1.32989	0.220663	0.341655	0.35485	0.0584568	1.60811	4.03666e-06	5.89643e-06	1.23906e-05	2.69097e-06	3.79738e-05	-0.0303221	-0.0279811	-0.0583146	0.0212956	-0.0283163
		MudTank 11	0.157891	23.4961	5.18486	8.02789	8.33827	3.16816e-06	1.37346	0.220669	0.341669	0.354879	0.0584551	1.6082	3.79121e-06	6.85276e-06	1.30259e-05	2.67532e-06	4.41138e-05
		SA01 11	0.0666131	22.9716	5.06909	7.84842	8.15156	5.96618e-07	1.34282	0.220668	0.341658	0.354854	0.0584556	1.60809	4.48525e-06	7.29611e-06	1.43999e-05	3.27869e-06	4.60043e-05	-0.0056741	-0.0176696	-0.0486536	0.0165962	-0.0186551
		MudTank 12	0.155428	23.2737	5.1358	7.95165	8.25898	4.85546e-06	1.36045	0.22067	0.341658	0.354863	0.0584543	1.60812	4.32346e-06	6.43307e-06	1.33252e-05	2.86171e-06	3.92885e-05
		SA01 12	0.0701212	22.8762	5.04801	7.81582	8.11788	2.08252e-07	1.33729	0.220667	0.341658	0.354862	0.0584579	1.60813	4.86699e-06	6.22902e-06	1.2838e-05	2.27757e-06	4.001e-05	-0.0311138	-0.0127521	-0.00798457	0.0268942	0.0220152
		MudTank 13	0.155505	23.3691	5.15704	7.98443	8.2929	1.26674e-06	1.36612	0.220678	0.341666	0.354866	0.0584583	1.60807	3.70362e-06	5.95108e-06	1.2027e-05	2.72355e-06	3.85965e-05
		SA01 13	0.0693304	23.2456	5.12964	7.94223	8.24899	1.13654e-05	1.35887	0.220672	0.341666	0.354863	0.0584573	1.6081	3.76448e-06	6.19548e-06	1.24415e-05	2.47072e-06	4.22954e-05	-0.017795	0.00192576	-0.0151431	-0.0330812	0.0148565
		MudTank 14	0.149208	23.2284	5.12589	7.93632	8.24308	-1.15377e-05	1.35794	0.220674	0.341665	0.354871	0.0584602	1.60812	3.59654e-06	6.02244e-06	1.20701e-05	2.65748e-06	4.09587e-05
		SA01 14	0.0679336	22.5179	4.96907	7.69369	7.99102	1.81048e-07	1.31651	0.220672	0.34167	0.354874	0.0584652	1.60815	3.88953e-06	5.54468e-06	1.19192e-05	2.51991e-06	3.87468e-05	-0.0227472	-0.0135043	-0.0321023	0.0573782	-0.00210326
		MudTank 15	0.147514	23.3199	5.14624	7.96806	8.27623	3.87827e-06	1.36336	0.22068	0.341685	0.3549	0.0584635	1.60821	3.91303e-06	6.14069e-06	1.16275e-05	2.35342e-06	3.85974e-05
		SA01 15	0.0659071	22.5328	4.97233	7.69871	7.99636	2.33764e-06	1.31723	0.220671	0.341667	0.354876	0.0584582	1.60817	3.58247e-06	5.84574e-06	1.0989e-05	2.38496e-06	3.77098e-05	-0.0147255	-0.0166577	-0.0226771	-0.0325082	0.00732224
		MudTank 16	0.157479	23.5153	5.18908	8.03428	8.34485	3.20847e-06	1.37463	0.220668	0.341661	0.354868	0.0584567	1.60816	3.54783e-06	6.11429e-06	1.1576e-05	2.49679e-06	3.83717e-05
		SA01 16	0.0715701	22.6514	4.99852	7.73906	8.03818	5.33203e-06	1.32416	0.220672	0.341659	0.354864	0.0584583	1.60811	3.47512e-06	6.55863e-06	1.33062e-05	2.93469e-06	4.82391e-05	0.0194822	0.0247793	0.0389538	0.0896818	0.068955
		MudTank 17	0.144986	22.5531	4.97672	7.70506	8.0026	3.16457e-05	1.31822	0.220667	0.341641	0.354833	0.0584494	1.608	3.78409e-06	6.05127e-06	1.21342e-05	2.52524e-06	3.91801e-05
		SA01 17	0.0696709	23.006	5.07681	7.86036	8.16423	1.13256e-05	1.34479	0.220673	0.341666	0.354874	0.058454	1.60814	3.49326e-06	6.83192e-06	1.31923e-05	2.71049e-06	4.87357e-05	0.0174468	0.0390047	0.0490895	0.015932	0.0790909
		MudTank 18	0.147696	23.2938	5.14028	7.95864	8.26648	2.13101e-05	1.36167	0.220672	0.341665	0.35488	0.0584567	1.60818	3.60501e-06	6.76847e-06	1.13647e-05	2.38162e-06	3.46e-05
	5 (2021-3-27)	MudTank 01	0.156162	23.2122	5.12229	7.9308	8.23731	1.7372e-05	1.3569	0.220672	0.341665	0.354869	0.0584563	1.60813	3.57087e-06	6.20418e-06	1.19893e-05	2.40508e-06	4.03181e-05
		SA01 01	0.0603409	22.1745	4.89338	7.57635	7.86915	-7.53451e-06	1.29637	0.220675	0.341668	0.354872	0.0584621	1.60812	4.06127e-06	5.7526e-06	1.294e-05	2.43537e-06	4.2087e-05	0.0210788	0.0118051	-0.00241345	0.0864195	0.0275865
		MudTank 02	0.155599	23.2027	5.12012	7.92751	8.23409	1.10308e-05	1.35638	0.220669	0.341663	0.354876	0.0584578	1.60818	4.05757e-06	6.50884e-06	1.2535e-05	2.35534e-06	3.83025e-05
		SA01 02	0.0616596	22.0598	4.86791	7.53707	7.82861	-9.53623e-06	1.28964	0.220669	0.341666	0.354881	0.0584609	1.60821	4.02744e-06	5.98497e-06	1.26943e-05	2.60531e-06	4.48262e-05	-0.00621505	0.000205596	0.0250107	0.0438787	0.0550115
		MudTank 03	0.153864	22.9752	5.06998	7.8499	8.1532	5.0229e-06	1.3431	0.220671	0.341668	0.354869	0.0584589	1.60813	3.76251e-06	5.70394e-06	1.20515e-05	2.80397e-06	3.90965e-05
		SA01 03	0.0578858	21.8161	4.81429	7.45396	7.74217	9.21584e-06	1.27537	0.220676	0.341672	0.354883	0.0584602	1.60816	4.15357e-06	6.04659e-06	1.24482e-05	2.22152e-06	3.67824e-05	0.0164841	0.00578199	0.0186588	0.0155399	0.0486593
		MudTank 04	0.151081	22.7211	5.01395	7.76318	8.06334	2.23821e-06	1.32827	0.220674	0.341673	0.354885	0.0584597	1.60819	3.33133e-06	6.17203e-06	1.27908e-05	2.85319e-06	4.50108e-05
		SA01 04	0.0598895	21.8934	4.83114	7.48012	7.76922	1.73459e-05	1.2798	0.220666	0.341661	0.354865	0.0584558	1.60816	4.49104e-06	7.14941e-06	1.24055e-05	2.91558e-06	3.93098e-05	-0.0272404	-0.0375454	-0.0672581	-0.114391	-0.0372601
		MudTank 05	0.150432	22.6239	4.99242	7.72999	8.02908	1.90225e-06	1.32271	0.22067	0.341674	0.354894	0.0584652	1.60826	3.9805e-06	6.88306e-06	1.28435e-05	2.53502e-06	3.93482e-05
		SA01 05	0.06025	22.1242	4.88222	7.55897	7.85115	9.02815e-06	1.29335	0.220673	0.341661	0.354867	0.0584585	1.60811	4.45536e-06	7.72644e-06	1.44777e-05	2.87454e-06	4.34498e-05	0.00528389	-0.0320313	-0.065479	-0.0547708	-0.035481
		MudTank 06	0.14347	22.9325	5.06062	7.83536	8.13845	4.20649e-06	1.3406	0.220674	0.34167	0.354886	0.0584582	1.60819	3.65351e-06	6.48268e-06	1.15838e-05	2.53636e-06	3.64852e-05
		SA01 06	0.0633794	22.0819	4.87278	7.54442	7.83613	-4.74725e-07	1.29084	0.220669	0.341657	0.354867	0.058457	1.60814	3.55526e-06	6.23891e-06	1.20644e-05	2.43175e-06	4.10799e-05	-0.0269845	-0.0468453	-0.0644309	-0.0519407	-0.0344329
		MudTank 07	0.110103	22.6583	5.00013	7.74177	8.04126	9.74519e-06	1.32464	0.220676	0.341676	0.354893	0.0584618	1.60821	3.13411e-06	5.31639e-06	1.16515e-05	2.66585e-06	4.56346e-05
		SA01 07	0.060199	21.9098	4.83494	7.48593	7.7753	5.51236e-06	1.28085	0.220675	0.341671	0.354878	0.0584601	1.60815	3.87476e-06	7.23586e-06	1.23159e-05	2.45014e-06	3.9377e-05	0.0122483	0.0102838	-0.00790598	-0.00397968	0.0220938
		MudTank 08	0.149084	22.7264	5.01501	7.76468	8.06487	-3.15969e-06	1.32856	0.220669	0.341659	0.354868	0.0584589	1.60815	3.89314e-06	6.06896e-06	1.2124e-05	3.02046e-06	4.06297e-05
		SA01 08	0.059682	22.064	4.8688	7.53832	7.82962	-7.1722e-06	1.28977	0.220667	0.341656	0.354859	0.0584556	1.60812	3.93287e-06	6.17788e-06	1.32426e-05	2.83369e-06	4.25676e-05	-0.0151501	-0.013158	-0.0323329	-0.0742663	-0.00233386
		MudTank 09	0.122092	22.6529	4.99885	7.73966	8.0389	9.08161e-06	1.32431	0.220672	0.341663	0.354873	0.0584611	1.60815	3.85731e-06	5.83518e-06	1.27618e-05	2.70568e-06	4.8116e-05
		SA01 09	0.0583716	21.7113	4.79097	7.41778	7.70432	-2.66545e-06	1.26907	0.220666	0.341654	0.354852	0.0584517	1.60809	4.05794e-06	6.60497e-06	1.24805e-05	2.68902e-06	4.25269e-05	-0.0329321	-0.0374065	-0.072413	-0.15331	-0.0424152
		MudTank 10	0.15345	22.5851	4.98399	7.71668	8.01505	-2.01905e-05	1.32033	0.220676	0.341671	0.354882	0.0584603	1.60816	3.81585e-06	6.37099e-06	1.23521e-05	2.31813e-06	4.20728e-05
		SA01 10	0.0578089	21.7573	4.80118	7.4338	7.72115	-5.00185e-06	1.27192	0.22067	0.34167	0.354877	0.0584596	1.60818	3.89281e-06	6.75533e-06	1.33615e-05	2.59611e-06	4.59449e-05	-0.0173151	0.00631089	0.00219266	0.0442589	0.0321927
		MudTank 11	0.153268	22.8372	5.03952	7.80265	8.10423	-8.63855e-06	1.33492	0.220672	0.341664	0.35487	0.0584538	1.60814	4.35114e-06	6.73987e-06	1.3297e-05	2.63625e-06	4.23929e-05
		SA01 11	0.0582011	21.796	4.80966	7.4467	7.73475	1.58058e-05	1.27413	0.220667	0.341655	0.35487	0.0584567	1.60817	4.12308e-06	6.89436e-06	1.46005e-05	2.60928e-06	4.42425e-05	-0.0124977	-0.0165382	0.0176807	0.0452295	0.0476812
		MudTank 12	0.0942791	22.3853	4.93974	7.6481	7.94361	1.2933e-05	1.30852	0.220669	0.341657	0.354858	0.0584544	1.6081	3.94425e-06	6.42338e-06	1.13361e-05	2.35595e-06	3.65436e-05
		SA01 12	0.05919	21.5631	4.75835	7.36745	7.65219	-6.30755e-06	1.26053	0.220671	0.341669	0.354874	0.0584579	1.60816	4.10906e-06	6.3915e-06	1.36036e-05	2.68806e-06	4.2903e-05	-0.0121334	0.020485	0.0176773	0.0128319	0.0476779
		MudTank 13	0.106831	22.2912	4.91919	7.61617	7.91064	7.30013e-06	1.30314	0.220679	0.341668	0.354878	0.0584599	1.60812	3.74767e-06	7.02744e-06	1.25913e-05	2.9056e-06	4.34492e-05
		SA01 13	0.0595717	21.4978	4.74389	7.34496	7.62871	-2.73171e-06	1.2567	0.220668	0.34166	0.354858	0.0584569	1.60811	4.37666e-06	6.94448e-06	1.17714e-05	2.48476e-06	3.77443e-05	-0.037521	-0.026808	-0.0554591	-0.0446972	-0.0254607
		MudTank 14	0.148878	22.371	4.93669	7.64351	7.93901	-4.82117e-06	1.30779	0.220673	0.34167	0.354879	0.0584591	1.60816	4.02381e-06	6.59513e-06	1.25098e-05	2.94613e-06	4.32993e-05
		SA01 14	0.0584975	21.5977	4.76598	7.37911	7.6646	-6.09304e-06	1.26255	0.220671	0.341662	0.354881	0.0584576	1.60819	4.09566e-06	7.50707e-06	1.35469e-05	2.72997e-06	4.46254e-05	-0.00673822	-0.0448071	-0.0401843	-0.0991223	-0.0101855
		MudTank 15	0.140593	22.1001	4.87688	7.55127	7.84359	1.12381e-05	1.29214	0.220672	0.341685	0.354912	0.0584678	1.60832	3.86831e-06	6.38931e-06	1.29569e-05	3.15578e-06	4.05836e-05
		SA01 15	0.0581478	21.6039	4.76737	7.3811	7.66642	7.70219e-06	1.26294	0.220672	0.341656	0.354863	0.0584589	1.6081	4.15442e-06	6.42033e-06	1.29996e-05	2.57431e-06	3.89176e-05	0.0064972	-0.0258846	-0.0516392	-0.00482343	-0.0216408
		MudTank 16	0.153577	22.7711	5.02486	7.77963	8.08033	-1.74127e-06	1.33098	0.220669	0.341646	0.354851	0.0584505	1.60807	4.77601e-06	6.98347e-06	1.30882e-05	2.90737e-06	4.0067e-05
		SA01 16	0.0614223	21.7048	4.78955	7.41552	7.70206	1.20149e-05	1.26878	0.220668	0.341654	0.354855	0.058456	1.60809	3.98159e-06	5.71271e-06	1.22448e-05	2.50444e-06	3.72979e-05	-0.00613509	0.00117503	-0.0170565	0.0524517	0.012943
		MudTank 17	0.152303	22.4453	4.953	7.66869	7.96518	9.28923e-06	1.31205	0.22067	0.341661	0.35487	0.0584555	1.60815	3.43275e-06	6.54233e-06	1.23106e-05	2.79906e-06	4.14925e-05
		SA01 17	0.0593268	21.5447	4.75429	7.3611	7.64537	8.31123e-07	1.25942	0.220671	0.341666	0.35486	0.058456	1.6081	3.62983e-06	5.32476e-06	1.13683e-05	2.32521e-06	4.18313e-05	0.0113709	0.0159998	-0.0268111	0.0314949	0.00318809
		MudTank 18	0.150787	22.4189	4.94711	7.65965	7.95576	6.58339e-06	1.31044	0.220667	0.34166	0.354868	0.0584527	1.60816	3.76051e-06	5.69708e-06	1.25642e-05	2.60247e-06	4.18886e-05
	6 (2021-3-27)	MudTank 01	0.154045	22.4385	4.95152	7.66633	7.9624	3.95867e-06	1.31159	0.22067	0.341658	0.354852	0.0584523	1.60807	4.61505e-06	5.91161e-06	1.19071e-05	2.46745e-06	3.78769e-05
		SA01 01	0.067952	21.3616	4.71386	7.29848	7.58071	1.20083e-05	1.24875	0.22067	0.341663	0.354875	0.0584575	1.60817	3.80406e-06	5.34403e-06	1.22559e-05	2.42883e-06	4.06325e-05	-0.0189509	-0.00273503	0.028896	0.0155321	0.0588969
		MudTank 02	0.142651	22.2958	4.92019	7.61781	7.91227	2.51822e-06	1.30343	0.220678	0.34167	0.354877	0.058461	1.60812	3.87853e-06	6.54359e-06	1.20324e-05	2.26672e-06	3.78313e-05
		SA01 02	0.0557526	21.3875	4.71956	7.3074	7.58994	1.88532e-05	1.25027	0.220669	0.341667	0.354878	0.0584578	1.60819	4.08641e-06	6.93037e-06	1.25992e-05	2.47679e-06	3.98916e-05	-0.0269314	-0.0012925	-0.0106367	-0.0187133	0.019363
		MudTank 03	0.143521	22.3121	4.92367	7.62326	7.91825	1.1788e-06	1.3043	0.220673	0.341665	0.354886	0.0584569	1.6082	4.5468e-06	6.33395e-06	1.3273e-05	2.82444e-06	4.08489e-05
		SA01 03	0.0723675	21.1617	4.66971	7.23027	7.50954	1.07495e-05	1.23699	0.220667	0.341667	0.354863	0.058454	1.60814	3.73725e-06	6.46554e-06	1.27061e-05	2.24245e-06	4.43356e-05	-0.0317005	0.00167405	-0.0744013	-0.0644589	-0.0444036
		MudTank 04	0.149126	22.0434	4.86446	7.53152	7.82306	-7.82926e-07	1.28863	0.220676	0.341667	0.354893	0.0584586	1.60821	3.91901e-06	6.88365e-06	1.31979e-05	2.85802e-06	4.12461e-05
		SA01 04	0.0621903	21.0553	4.64614	7.19382	7.47182	6.01415e-06	1.23092	0.220663	0.341663	0.354867	0.0584611	1.60818	4.06869e-06	5.98741e-06	1.27238e-05	2.51379e-06	3.97009e-05	-0.0534122	-0.0131804	-0.051379	0.0472847	-0.0213805
		MudTank 05	0.149122	22.2002	4.899	7.58508	7.87832	-8.34446e-06	1.29778	0.220674	0.341668	0.354877	0.0584581	1.60815	3.85357e-06	5.49785e-06	1.02453e-05	2.35878e-06	3.26591e-05
		SA01 05	0.057051	21.195	4.67723	7.2418	7.52148	6.42295e-06	1.239	0.220676	0.341674	0.35487	0.058457	1.60811	4.04042e-06	6.03697e-06	1.2059e-05	2.22079e-06	4.01383e-05	-0.00440885	0.00623812	-0.0534557	-0.0475799	-0.0234574
		MudTank 06	0.146685	21.9393	4.84154	7.49614	7.78625	1.14249e-05	1.2826	0.220679	0.341677	0.3549	0.0584615	1.60822	4.05182e-06	5.97314e-06	1.23662e-05	2.90859e-06	3.74694e-05
		SA01 06	0.0556005	21.3874	4.71958	7.30731	7.58981	1.78555e-05	1.25025	0.220671	0.341664	0.354872	0.058457	1.60815	4.12519e-06	6.72565e-06	1.28151e-05	2.84498e-06	4.35395e-05	-0.0285347	-0.0178511	-0.0307135	-0.0326435	-0.00071446
		MudTank 07	0.150136	22.1324	4.88407	7.56183	7.85405	-4.11841e-06	1.29378	0.220675	0.341663	0.354866	0.0584564	1.60809	3.49772e-06	7.29427e-06	1.17056e-05	2.73654e-06	3.99681e-05
		SA01 07	0.0552601	21.3251	4.70589	7.28614	7.56783	2.95346e-06	1.24666	0.220674	0.34167	0.354879	0.0584597	1.60816	4.00431e-06	6.20078e-06	1.24618e-05	2.43195e-06	3.9962e-05	-0.00482512	0.0137151	0.0258585	0.0640107	0.0558593
		MudTank 08	0.146853	21.8903	4.83065	7.4792	7.76828	-6.05425e-06	1.2796	0.220675	0.341667	0.354874	0.0584556	1.60813	3.87004e-06	6.31334e-06	1.13582e-05	2.64047e-06	3.60531e-05
		SA01 08	0.0614459	21.1713	4.6719	7.23343	7.51322	1.45668e-05	1.23756	0.220672	0.341663	0.354879	0.0584547	1.60817	4.15091e-06	5.8991e-06	1.3171e-05	2.81071e-06	4.24503e-05	-0.0198115	-0.025773	0.00983635	-0.027018	0.0398366
		MudTank 09	0.146599	21.8749	4.82732	7.47414	7.76292	7.26646e-06	1.27874	0.220678	0.341676	0.354877	0.0584569	1.60812	3.93846e-06	6.53388e-06	1.35305e-05	2.70581e-06	4.23038e-05
		SA01 09	0.0658964	20.8256	4.5957	7.11535	7.39035	-1.4318e-05	1.21742	0.220675	0.341664	0.354868	0.0584577	1.6081	4.05814e-06	6.89129e-06	1.18126e-05	2.4385e-06	3.87925e-05	-0.00518254	-0.0277187	-0.0312995	0.00823574	-0.00130043
		MudTank 10	0.155	21.9149	4.83606	7.48766	7.77717	-6.87136e-06	1.28108	0.220675	0.34167	0.354881	0.0584575	1.60817	3.93587e-06	7.47541e-06	1.24019e-05	2.81092e-06	4.02526e-05
		SA01 10	0.0649408	21.0798	4.65166	7.20212	7.48047	-1.99033e-05	1.2322	0.220669	0.341659	0.354864	0.0584542	1.60813	3.3147e-06	5.59101e-06	1.27285e-05	2.49659e-06	4.4551e-05	-0.0196023	-0.0209497	-0.0138238	-0.00321498	0.0161758
		MudTank 11	0.15411	22.013	4.85766	7.52103	7.81147	6.28848e-06	1.28669	0.220672	0.341663	0.354856	0.0584513	1.60807	4.02254e-06	6.85455e-06	1.1086e-05	2.43888e-06	3.37869e-05
		SA01 11	0.0683374	21.0601	4.64743	7.19563	7.47343	3.16822e-06	1.23104	0.220674	0.341671	0.354862	0.0584538	1.60808	4.02402e-06	6.48435e-06	1.21893e-05	2.60194e-06	4.01614e-05	0.0103454	0.0166679	-0.0289714	-0.014551	0.00102777
		MudTank 12	0.15161	21.9817	4.85075	7.51045	7.80105	-2.83077e-05	1.285	0.220672	0.341668	0.354889	0.058458	1.60822	3.85854e-06	6.59119e-06	1.1822e-05	3.01258e-06	4.10242e-05
		SA01 12	0.0557022	20.9789	4.62936	7.1678	7.44493	2.48503e-06	1.22642	0.220667	0.341667	0.354877	0.0584601	1.6082	3.77431e-06	6.9975e-06	1.361e-05	2.6239e-06	4.81192e-05	-0.0179152	0.00835875	-0.0142503	0.0463008	0.0157493
		MudTank 13	0.148069	21.7336	4.79597	7.4255	7.71273	-9.87803e-06	1.27047	0.220671	0.34166	0.354876	0.0584567	1.60817	3.14716e-06	6.09685e-06	1.23173e-05	2.21218e-06	4.09176e-05
		SA01 13	0.0634033	20.9833	4.63044	7.16905	7.44583	-1.49948e-06	1.22652	0.220673	0.341655	0.354846	0.0584521	1.60802	3.8679e-06	5.71709e-06	1.22279e-05	2.18976e-06	3.88302e-05	0.00836211	-0.0316032	-0.0923998	-0.089576	-0.0624026
		MudTank 14	0.146173	21.7395	4.79729	7.42779	7.71494	-2.96627e-06	1.27085	0.220671	0.341672	0.354881	0.0584579	1.60819	3.78389e-06	6.73358e-06	1.30303e-05	2.89195e-06	4.11006e-05
		SA01 14	0.0554373	20.986	4.63104	7.17001	7.44699	2.42176e-07	1.22675	0.220673	0.341657	0.354855	0.0584558	1.60806	3.71359e-06	6.71821e-06	1.13575e-05	2.74758e-06	3.9015e-05	-0.00389703	-0.0665847	-0.121489	-0.128897	-0.0914925
		MudTank 15	0.143761	21.3626	4.71419	7.2993	7.58189	3.8908e-06	1.24904	0.220676	0.341687	0.354915	0.0584687	1.60831	3.97979e-06	5.79524e-06	1.194e-05	2.2576e-06	3.87891e-05
		SA01 15	0.0563858	21.0743	4.65047	7.20045	7.47873	8.86809e-06	1.23192	0.22067	0.341669	0.354873	0.0584556	1.60817	4.37659e-06	5.97377e-06	1.23538e-05	2.92573e-06	3.95678e-05	-0.026871	-0.023233	-0.0476429	-0.112664	-0.0176443
		MudTank 16	0.155028	22.0683	4.86994	7.54002	7.83129	-8.63274e-06	1.29002	0.220676	0.341667	0.354865	0.0584556	1.60809	3.62537e-06	5.75899e-06	1.27906e-05	2.22881e-06	4.34685e-05
		SA01 16	0.0548324	20.9415	4.62135	7.15499	7.43167	-5.0833e-06	1.22419	0.220679	0.341665	0.354877	0.0584575	1.60812	3.99029e-06	6.19192e-06	1.25547e-05	2.52275e-06	4.29919e-05	0.0176541	0.00584718	0.0390661	0.0278504	0.0690672
		MudTank 17	0.126971	21.9252	4.83834	7.49096	7.78044	4.51386e-06	1.28166	0.220674	0.341659	0.354862	0.058456	1.60808	3.98984e-06	5.74791e-06	1.21306e-05	2.68861e-06	4.37155e-05
		SA01 17	0.0572856	21.1705	4.67155	7.23285	7.51205	1.03604e-05	1.23744	0.220663	0.341647	0.354835	0.0584512	1.60804	3.72849e-06	5.51608e-06	1.08619e-05	1.99502e-06	3.9285e-05	-0.0373088	-0.0228737	-0.0613271	-0.0215336	-0.0313289
		MudTank 18	0.154391	22.0883	4.87419	7.5465	7.83808	2.28434e-06	1.29104	0.220668	0.341651	0.354851	0.0584489	1.60808	4.30494e-06	6.90726e-06	1.22939e-05	2.52981e-06	3.33845e-05
Shard3	7 (2021-3-27)	MudTank 01	0.153422	21.8052	4.81133	7.44919	7.73636	-1.20482e-06	1.27419	0.220651	0.341625	0.354794	0.0584351	1.60795	4.05214e-06	6.35635e-06	1.25335e-05	2.61906e-06	3.99287e-05
		SA01 01	0.0856736	21.1861	4.67503	7.23792	7.51689	-4.15123e-06	1.23807	0.220665	0.341635	0.354803	0.0584376	1.60788	3.51079e-06	5.56681e-06	1.17106e-05	2.40767e-06	3.84019e-05	0.0634486	0.0263446	0.0310041	0.0513391	0.061005
		MudTank 02	0.15319	21.7121	4.79081	7.41745	7.70325	-8.71771e-06	1.26874	0.220651	0.341627	0.35479	0.0584348	1.60792	3.81573e-06	6.50648e-06	1.25359e-05	2.50405e-06	3.82037e-05
		SA01 02	0.0752526	21.0586	4.64672	7.19429	7.47161	-8.24198e-06	1.23068	0.220657	0.341632	0.354802	0.0584406	1.60793	3.79399e-06	6.01271e-06	1.21322e-05	2.71694e-06	4.33637e-05	0.0317245	0.0190267	0.0450976	0.0941209	0.075099
		MudTank 03	0.14129	21.9	4.8322	7.48155	7.76972	2.97695e-05	1.27974	0.220649	0.341624	0.354782	0.0584356	1.6079	3.42538e-06	5.63424e-06	1.08631e-05	1.94687e-06	3.93722e-05
		SA01 03	0.138294	21.3284	4.70633	7.28648	7.56752	1.28052e-05	1.24637	0.22066	0.341632	0.354809	0.058437	1.60795	4.02558e-06	6.31167e-06	1.28752e-05	2.83014e-06	4.23418e-05	0.029458	0	0.0521434	-0.00855615	0.082145
		MudTank 04	0.146551	21.8556	4.82262	7.46677	7.75437	1.8009e-05	1.27722	0.220658	0.34164	0.354799	0.0584389	1.60792	4.58271e-06	7.85217e-06	1.32046e-05	3.02113e-06	4.14179e-05
		SA01 04	0.0834012	21.1501	4.66691	7.22545	7.50365	1.07689e-05	1.23597	0.220656	0.341626	0.35478	0.058438	1.60784	3.75563e-06	6.07538e-06	1.08544e-05	2.10989e-06	3.54667e-05	0.00679796	-0.0278074	-0.0394595	0.0427822	-0.0094607
		MudTank 05	0.150303	21.6177	4.76997	7.38528	7.66973	-2.94428e-07	1.26317	0.220651	0.341631	0.354789	0.0584322	1.60792	4.26387e-06	6.85366e-06	1.30086e-05	2.7658e-06	4.07438e-05
		SA01 05	0.0804529	20.9846	4.63051	7.16916	7.44542	-7.80803e-06	1.22632	0.220662	0.34164	0.354804	0.0584392	1.6079	4.14525e-06	6.67501e-06	1.29976e-05	2.67115e-06	4.196e-05	0.0317237	0.0292714	0.03946	0.0770093	0.0694611
		MudTank 06	0.150249	21.8284	4.81665	7.45724	7.74454	1.55399e-06	1.27559	0.220659	0.341629	0.354791	0.0584369	1.60787	4.23368e-06	6.60802e-06	1.23266e-05	2.5782e-06	3.98385e-05
		SA01 06	0.0692591	20.8374	4.59792	7.11868	7.39313	-5.18302e-06	1.21768	0.220657	0.34163	0.354801	0.058437	1.60793	4.64175e-06	6.76971e-06	1.17424e-05	2.41679e-06	3.6942e-05	-0.0135956	-0.0073178	0.00281849	-0.00855615	0.0328186
		MudTank 07	0.151664	21.612	4.76892	7.38343	7.66813	2.56912e-05	1.26297	0.220661	0.341636	0.354809	0.0584385	1.60794	3.92981e-06	4.47061e-06	1.07371e-05	2.10711e-06	3.35334e-05
		SA01 07	0.0757422	21.0452	4.64382	7.18953	7.46656	5.48463e-06	1.2298	0.220659	0.341623	0.354786	0.0584363	1.60785	4.31596e-06	6.32501e-06	1.12121e-05	2.61237e-06	3.74053e-05	-0.0317222	-0.0409792	-0.0662327	-0.0085563	-0.0362347
		MudTank 08	0.15204	21.8018	4.81102	7.44831	7.73546	-1.41034e-05	1.27399	0.220671	0.341638	0.35481	0.0584355	1.60787	3.52183e-06	6.25967e-06	1.32808e-05	2.90181e-06	4.45178e-05
		SA01 08	0.0815532	20.8857	4.60873	7.13527	7.41028	-6.46216e-06	1.22055	0.220665	0.341635	0.354802	0.0584399	1.60788	3.84664e-06	7.19661e-06	1.27526e-05	2.61142e-06	4.22469e-05	0.00906359	0.0146357	0.00281848	0.0855652	0.0328186
		MudTank 09	0.150066	21.7445	4.79803	7.4284	7.71479	1.63013e-05	1.27064	0.220655	0.341622	0.354792	0.0584349	1.60791	4.37383e-06	6.26482e-06	1.15619e-05	2.30485e-06	3.85156e-05
		SA01 09	0.0837946	20.9124	4.61444	7.14441	7.41968	6.1414e-06	1.22208	0.220655	0.341635	0.354799	0.0584383	1.60793	4.36469e-06	6.45516e-06	1.35005e-05	2.62234e-06	4.17896e-05	0.00679799	0.0439084	0.045098	0.0427822	0.0750993
		MudTank 10	0.153285	21.6508	4.77729	7.39629	7.68114	-1.14492e-06	1.26519	0.220652	0.341618	0.354774	0.0584362	1.60784	4.25978e-06	5.69815e-06	1.18379e-05	2.25497e-06	3.82698e-05
		SA01 10	0.0861288	21.1447	4.66586	7.22367	7.50183	1.61399e-06	1.23561	0.220664	0.341631	0.354787	0.0584363	1.60782	3.85523e-06	7.13745e-06	1.31274e-05	2.63671e-06	4.87498e-05	0.0521181	0.0395179	0.025368	0.0513409	0.0553687
		MudTank 11	0.1516	21.4284	4.72826	7.32032	7.60243	4.36711e-06	1.25206	0.220653	0.341617	0.354782	0.0584301	1.60787	3.45431e-06	5.79364e-06	1.09471e-05	2.28268e-06	3.55332e-05
		SA01 11	0.0883414	21.086	4.65279	7.20379	7.48136	3.45558e-06	1.23224	0.220658	0.341639	0.354803	0.058439	1.60793	3.88639e-06	5.89806e-06	1.19161e-05	2.75427e-06	4.25364e-05	0.00906388	0.0482989	0.0662383	0.128355	0.0962403
		MudTank 12	0.152666	21.6683	4.78131	7.4025	7.6874	5.35739e-06	1.26614	0.220659	0.341628	0.354777	0.0584329	1.6078	4.33762e-06	6.56731e-06	1.2861e-05	2.36587e-06	4.07636e-05
		SA01 12	0.0787832	21.0381	4.64224	7.18725	7.46424	-6.72942e-06	1.22944	0.220658	0.34163	0.354795	0.0584383	1.60789	4.52863e-06	6.68447e-06	1.37167e-05	2.64424e-06	4.15713e-05	0	0.00439073	0.0239581	0.0598961	0.0539588
		MudTank 13	0.153049	21.7705	4.80381	7.43742	7.72405	4.07834e-06	1.27219	0.220657	0.341629	0.354796	0.0584365	1.60791	3.83764e-06	6.34931e-06	1.33712e-05	2.86733e-06	4.55238e-05
		SA01 13	0.0836129	20.9554	4.62393	7.15895	7.43475	-5.946e-06	1.22464	0.220656	0.341628	0.354788	0.0584402	1.60788	3.61409e-06	6.00865e-06	1.10165e-05	2.44393e-06	3.90304e-05	0	-1.11022e-13	-0.0295943	0.0598941	0.00040485
		MudTank 14	0.150964	21.5843	4.76268	7.37375	7.6581	-2.43713e-06	1.26132	0.220655	0.341627	0.354801	0.0584371	1.60794	4.6838e-06	7.03882e-06	1.35534e-05	2.84679e-06	3.91825e-05
		SA01 14	0.0782847	20.9056	4.61302	7.14207	7.41725	-6.5757e-06	1.22174	0.22066	0.341635	0.354798	0.0584407	1.6079	4.0209e-06	6.68928e-06	1.3144e-05	3.00404e-06	4.52969e-05	0.0113298	0	-0.0169107	0.059893	0.0130887
		MudTank 15	0.149428	21.5769	4.76116	7.37159	7.65562	-1.88125e-06	1.26091	0.22066	0.341643	0.354807	0.0584381	1.60793	3.99689e-06	6.57418e-06	1.25849e-05	2.89168e-06	4.05015e-05
		SA01 15	0.0794067	20.823	4.59502	7.11405	7.38826	2.07638e-06	1.21695	0.220671	0.341644	0.354813	0.0584429	1.60788	3.78429e-06	5.12927e-06	1.1969e-05	2.44986e-06	4.20782e-05	0.0589147	0.0380528	0.0577803	0.136904	0.087782
		MudTank 16	0.151242	21.4229	4.7271	7.31849	7.60039	3.95199e-06	1.25178	0.220656	0.341619	0.354778	0.0584316	1.60783	4.69014e-06	6.89387e-06	1.33629e-05	2.89402e-06	3.80733e-05
		SA01 16	0.0683772	20.8054	4.59082	7.1076	7.38139	1.7272e-05	1.21576	0.220655	0.341624	0.354783	0.0584351	1.60786	3.55773e-06	7.01825e-06	1.3549e-05	3.05074e-06	4.56457e-05	-0.0135957	-0.0102451	-0.01973	0.00855659	0.0102694
		MudTank 17	0.143478	21.1971	4.67733	7.24168	7.52075	5.07042e-06	1.2387	0.22066	0.341636	0.354802	0.0584374	1.60791	3.94627e-06	5.59989e-06	1.08532e-05	2.16658e-06	3.73855e-05
		SA01 17	0.080725	20.9553	4.62408	7.15906	7.43489	1.34415e-05	1.22458	0.220664	0.341634	0.354798	0.0584377	1.60787	3.9451e-06	6.55076e-06	1.16996e-05	2.84046e-06	3.8691e-05	0.0430537	0.0263447	0.0591921	0.0941257	0.0891939
		MudTank 18	0.141896	21.4853	4.74071	7.33968	7.62194	4.69884e-05	1.25535	0.220649	0.341614	0.354752	0.0584283	1.60776	4.05433e-06	6.5106e-06	1.20238e-05	2.31959e-06	3.47207e-05
	8 (2021-3-27)	MudTank 01	0.151272	21.6455	4.7762	7.39458	7.67927	4.12543e-06	1.26482	0.220655	0.341621	0.354773	0.0584331	1.60782	3.95886e-06	5.29416e-06	1.03139e-05	1.81645e-06	3.41825e-05
		SA01 01	0.0599556	21.3405	4.70891	7.29062	7.57149	1.24175e-05	1.24712	0.220656	0.341633	0.354795	0.0584393	1.60791	4.45387e-06	6.5063e-06	1.26869e-05	2.89707e-06	3.91395e-05	0.00263199	0.0321675	0.0473027	0.105978	0.0773041
		MudTank 02	0.149841	21.469	4.73727	7.33433	7.61684	1.10566e-05	1.2545	0.220656	0.341624	0.354783	0.0584331	1.60785	3.61589e-06	6.06251e-06	1.08558e-05	2.37652e-06	3.32412e-05
		SA01 02	0.0579792	20.9323	4.61915	7.15142	7.42702	-8.78641e-06	1.22327	0.220671	0.341645	0.354811	0.0584394	1.60788	4.48028e-06	7.17024e-06	1.3553e-05	2.78655e-06	3.78863e-05	0.0526406	0.0640908	0.0668091	0.103688	0.0968111
		MudTank 03	0.149941	21.5313	4.75115	7.35558	7.63915	-4.26606e-06	1.25815	0.220662	0.341622	0.354793	0.0584336	1.60785	3.68793e-06	6.52053e-06	1.16265e-05	2.53302e-06	4.20953e-05
		SA01 03	0.0677234	21.2194	4.68214	7.24887	7.5281	5.9336e-06	1.23994	0.220654	0.341616	0.354774	0.0584342	1.60783	3.47658e-06	6.11356e-06	1.16199e-05	2.37466e-06	3.88045e-05	-0.041298	-0.0419538	-0.0696831	-0.044124	-0.0396852
		MudTank 04	0.150635	21.718	4.79238	7.41968	7.70566	1.17223e-06	1.26919	0.220664	0.341637	0.354806	0.0584399	1.6079	3.98356e-06	6.9271e-06	1.37726e-05	2.87815e-06	4.43751e-05
		SA01 04	0.0580035	20.9652	4.6261	7.16229	7.43837	3.04094e-06	1.22511	0.220657	0.341628	0.354797	0.0584357	1.60791	4.22887e-06	6.31103e-06	1.25755e-05	2.49492e-06	4.00561e-05	-0.0265317	-0.0213792	-0.0173447	-0.0491407	0.0126548
		MudTank 05	0.149185	21.6762	4.7831	7.40531	7.6907	-1.96186e-06	1.2667	0.220661	0.341633	0.3548	0.0584373	1.60789	4.26536e-06	6.11936e-06	1.16812e-05	2.5453e-06	3.85863e-05
		SA01 05	0.0567501	20.8902	4.60958	7.13681	7.41174	9.95943e-06	1.22079	0.220657	0.341635	0.354796	0.0584385	1.6079	4.43992e-06	6.74133e-06	1.40892e-05	2.90135e-06	4.3407e-05	-0.00600149	0.00697602	-0.0217341	0.0165862	0.0082652
		MudTank 06	0.145779	21.5005	4.74422	7.34524	7.62852	-1.05771e-06	1.25644	0.220656	0.341631	0.354807	0.0584377	1.60796	3.64642e-06	6.72045e-06	1.25679e-05	2.71458e-06	4.61029e-05
		SA01 06	0.0591748	20.9936	4.63236	7.17202	7.44838	-1.19207e-05	1.22679	0.220656	0.34163	0.354794	0.0584366	1.6079	4.64658e-06	6.45408e-06	1.427e-05	2.49538e-06	4.32533e-05	-0.00468014	-0.00473188	-0.00531084	0.00158223	0.024689
		MudTank 07	0.15033	21.6447	4.77607	7.39448	7.67918	1.19932e-06	1.26481	0.220658	0.341631	0.354784	0.0584353	1.60785	4.3911e-06	5.28223e-06	1.11783e-05	1.99842e-06	3.38039e-05
		SA01 07	0.0571374	20.9752	4.62835	7.16564	7.44167	-1.09756e-05	1.22563	0.220659	0.341625	0.354785	0.0584326	1.60784	3.45758e-06	6.75311e-06	1.17327e-05	2.5897e-06	4.40811e-05	-0.00518448	-0.00432701	-0.00829035	-0.0482936	0.0217094
		MudTank 08	0.148919	21.5926	4.76466	7.3765	7.66085	2.06946e-06	1.26177	0.220662	0.341622	0.354791	0.0584356	1.60785	3.20622e-06	6.45544e-06	1.14829e-05	2.56439e-06	4.54758e-05
		SA01 08	0.0564899	20.7213	4.57239	7.07911	7.35186	5.7127e-06	1.21093	0.220661	0.341635	0.354798	0.0584393	1.60788	4.35685e-06	6.30026e-06	1.37071e-05	2.77181e-06	4.09877e-05	0.00859719	0.0297447	0.020955	0.0709811	0.0509557
		MudTank 09	0.146956	21.589	4.76376	7.37537	7.65953	2.92128e-06	1.26155	0.220657	0.341627	0.354789	0.0584348	1.60788	3.92823e-06	6.4402e-06	1.35678e-05	2.44459e-06	4.53647e-05
		SA01 09	0.0578325	20.873	4.60583	7.13077	7.40558	-5.4242e-06	1.21977	0.220659	0.341627	0.354792	0.0584376	1.60787	3.66778e-06	6.03931e-06	1.20657e-05	2.58219e-06	4.28598e-05	0.0104504	0.0167977	0.0256162	0.0857887	0.0556169
		MudTank 10	0.15245	21.6211	4.77086	7.3861	7.67068	7.3138e-06	1.26333	0.220657	0.341615	0.354777	0.0584304	1.60782	3.92443e-06	6.48668e-06	1.26295e-05	2.59568e-06	4.0041e-05
		SA01 10	0.0623318	20.9875	4.63109	7.16994	7.44651	4.92985e-06	1.22639	0.22066	0.341631	0.354809	0.0584349	1.60794	4.26414e-06	7.11428e-06	1.26931e-05	2.58283e-06	3.88541e-05	0.012166	0.0242261	0.0760367	0.0684161	0.106039
		MudTank 11	0.148822	21.1812	4.67377	7.23609	7.51476	-8.44449e-06	1.23764	0.220657	0.341629	0.354786	0.0584314	1.60786	4.37822e-06	6.86354e-06	1.37996e-05	2.82508e-06	4.0418e-05
		SA01 11	0.0691549	21.3452	4.71003	7.29203	7.57293	5.5596e-06	1.24735	0.22066	0.341623	0.354783	0.0584368	1.60783	3.92673e-06	6.83334e-06	1.26564e-05	2.4619e-06	3.8835e-05	0.0185559	0.00035475	0.00826784	0.1121	0.0382681
		MudTank 12	0.14951	21.3826	4.71814	7.30464	7.58595	-3.75008e-06	1.24936	0.220654	0.341617	0.354774	0.0584291	1.60783	4.33026e-06	7.72815e-06	1.41019e-05	2.88605e-06	4.34184e-05
		SA01 12	0.0581987	20.9651	4.62596	7.16219	7.43792	-1.67445e-07	1.22509	0.220651	0.341625	0.354776	0.0584348	1.60786	4.11023e-06	4.96118e-06	9.73664e-06	2.19014e-06	3.24545e-05	-0.0273518	0.01465	-0.0171366	0.0677547	0.0128629
		MudTank 13	0.149216	21.3946	4.72093	7.30888	7.5906	3.94453e-06	1.25014	0.22066	0.341623	0.354791	0.0584325	1.60786	3.85166e-06	6.33345e-06	1.38683e-05	2.87517e-06	4.90854e-05
		SA01 13	0.0591593	21.0668	4.64861	7.19715	7.47458	1.93551e-06	1.23107	0.220661	0.341635	0.354805	0.0584368	1.60792	4.30625e-06	5.96758e-06	1.2391e-05	2.43756e-06	4.05882e-05	0.0161679	0.0398066	0.0593605	0.0375248	0.0893623
		MudTank 14	0.141623	20.7444	4.57734	7.08673	7.35965	7.87575e-06	1.21224	0.220654	0.341621	0.354777	0.0584366	1.60784	3.46227e-06	6.78307e-06	1.30667e-05	2.72773e-06	4.82582e-05
		SA01 14	0.0566645	20.6697	4.561	7.0615	7.33379	-1.5399e-06	1.20798	0.220661	0.341635	0.354809	0.0584423	1.60794	4.23174e-06	6.01608e-06	1.25229e-05	2.87109e-06	3.70603e-05	0.0195033	0.0533545	0.088393	0.134771	0.118396
		MudTank 15	0.134298	21.7244	4.79368	7.42132	7.70731	2.30118e-05	1.2694	0.220658	0.341612	0.354778	0.0584323	1.60781	4.80897e-06	7.13394e-06	1.378e-05	2.88453e-06	4.3831e-05
		SA01 15	0.0555054	20.6834	4.56408	7.06614	7.33817	-8.54398e-06	1.20864	0.220664	0.341633	0.354786	0.0584355	1.60781	4.32607e-06	6.79182e-06	1.32591e-05	2.40623e-06	4.14307e-05	0.0321841	0.0476504	0.00635995	0.0308436	0.0363601
		MudTank 16	0.150414	21.3841	4.71851	7.30528	7.58686	5.15014e-06	1.24959	0.220655	0.341621	0.354789	0.0584351	1.60789	3.41434e-06	5.9141e-06	9.82262e-06	2.46486e-06	3.66292e-05
		SA01 16	0.0583095	20.8176	4.59366	7.11186	7.38592	1.314e-05	1.21654	0.220662	0.341627	0.354792	0.0584379	1.60785	4.37752e-06	6.32093e-06	1.22618e-05	2.48739e-06	4.00963e-05	0.0348382	-0.00105446	0.00279398	0.0611066	0.0327941
		MudTank 17	0.149955	21.3028	4.70054	7.27773	7.55809	-6.85112e-06	1.2448	0.220654	0.341633	0.354793	0.0584336	1.60792	3.81194e-06	5.4853e-06	9.89173e-06	2.24423e-06	2.99558e-05
		SA01 17	0.0586167	21.2636	4.69198	7.2638	7.54373	9.21522e-06	1.24246	0.220657	0.341607	0.354773	0.0584315	1.6078	3.78553e-06	6.87049e-06	1.29394e-05	2.85269e-06	4.62197e-05	0.00384761	-0.0710413	-0.0740003	-0.025807	-0.0440025
		MudTank 18	0.149436	21.3358	4.70792	7.28893	7.57	-4.45977e-06	1.2467	0.220659	0.34163	0.354804	0.0584325	1.60793	4.3304e-06	6.30991e-06	1.20512e-05	2.41459e-06	3.73229e-05
	9 (2021-3-27)	MudTank 01	0.12467	21.7605	4.80182	7.43422	7.72123	-6.09353e-07	1.27175	0.220667	0.341638	0.354828	0.058443	1.60798	4.0488e-06	6.30652e-06	1.29337e-05	2.24058e-06	4.39001e-05
		SA01 01	0.0590238	19.9273	4.39738	6.8083	7.07105	3.70477e-06	1.1647	0.220671	0.341656	0.35484	0.058447	1.60801	3.29055e-06	5.64551e-06	9.98041e-06	2.32094e-06	3.25626e-05	0.0236252	0.0483877	0.0520443	0.109294	0.0820459
		MudTank 02	0.12458	21.5685	4.75939	7.36865	7.65284	3.58973e-06	1.26042	0.220664	0.34164	0.354816	0.0584382	1.60795	4.15669e-06	5.61964e-06	1.06857e-05	2.16952e-06	3.40483e-05
		SA01 02	0.0579099	19.5497	4.31393	6.67936	6.93716	2.42224e-07	1.14272	0.220664	0.34166	0.354846	0.0584519	1.60808	3.91127e-06	5.70426e-06	1.14313e-05	1.96726e-06	4.03326e-05	0.00536558	0.0325931	0.0545902	0.186203	0.0845918
		MudTank 03	0.122192	21.5184	4.74829	7.35191	7.63554	-2.41022e-05	1.25762	0.220662	0.341657	0.354838	0.0584439	1.60806	3.94269e-06	6.71684e-06	1.16513e-05	2.6656e-06	3.8508e-05
		SA01 03	0.0582941	19.9402	4.40024	6.81268	7.07561	-8.94021e-06	1.16547	0.220672	0.341656	0.354842	0.0584485	1.60801	3.9004e-06	6.43011e-06	1.30897e-05	2.59722e-06	4.27305e-05	0.0371041	0.0230976	0.0425493	0.0877865	0.0725506
		MudTank 04	0.119347	21.5748	4.76081	7.37076	7.65503	-1.15135e-06	1.26088	0.220666	0.341639	0.354816	0.0584429	1.60793	4.22911e-06	6.42104e-06	1.40706e-05	2.99613e-06	4.18637e-05
		SA01 04	0.058348	19.9879	4.41057	6.82856	7.09197	-4.84155e-06	1.16816	0.220662	0.341634	0.354813	0.0584433	1.60795	3.10185e-06	5.53686e-06	1.10842e-05	2.3813e-06	3.82399e-05	-0.0174994	-0.0141751	-0.0128799	0.0326737	0.0171198
		MudTank 05	0.117582	21.4586	4.73517	7.3311	7.61391	5.88748e-06	1.25403	0.220665	0.34164	0.35482	0.0584398	1.60795	3.97413e-06	6.49472e-06	1.25715e-05	2.54794e-06	4.48362e-05
		SA01 05	0.0561511	19.6964	4.34632	6.72898	6.98867	-2.20182e-06	1.15115	0.220665	0.341634	0.354818	0.0584445	1.60795	3.78567e-06	6.49847e-06	1.14112e-05	2.58759e-06	3.79439e-05	0.00424732	-0.0114189	0.00412135	0.0679475	0.0341215
		MudTank 06	0.115508	21.3391	4.70875	7.29019	7.57137	-7.11904e-06	1.24708	0.220663	0.341636	0.354813	0.0584413	1.60794	4.02372e-06	5.9347e-06	1.21018e-05	2.59793e-06	3.86918e-05
		SA01 06	0.0559087	19.5349	4.31068	6.67396	6.93165	5.137e-06	1.14174	0.220666	0.341643	0.354834	0.0584463	1.60802	4.88891e-06	6.02835e-06	1.17781e-05	2.39719e-06	3.86826e-05	0.0108714	0.0225157	0.0512499	0.0872107	0.0812515
		MudTank 07	0.119242	21.4688	4.73738	7.33451	7.61754	9.35588e-06	1.25466	0.220663	0.341635	0.354819	0.058441	1.60796	3.72277e-06	5.78388e-06	1.18335e-05	2.44865e-06	3.48921e-05
		SA01 07	0.0561741	19.9478	4.40169	6.81491	7.07769	3.24786e-06	1.16572	0.220661	0.341637	0.354811	0.0584385	1.60795	3.89685e-06	6.16677e-06	1.40713e-05	2.58525e-06	4.78751e-05	-0.0175698	-0.00347996	-0.0243497	-0.0375447	0.00564956
		MudTank 08	0.117116	21.4027	4.72284	7.31204	7.59411	3.34966e-06	1.25078	0.220666	0.341641	0.35482	0.0584404	1.60795	3.99098e-06	6.27696e-06	1.21479e-05	2.57036e-06	3.97317e-05
		SA01 08	0.0590205	20.0102	4.41537	6.83611	7.09962	9.13517e-06	1.16945	0.220656	0.341631	0.3548	0.0584425	1.60793	4.00097e-06	6.54331e-06	1.19204e-05	2.34526e-06	4.29566e-05	-0.026866	-0.0323794	-0.0642884	-0.0162474	-0.0342903
		MudTank 09	0.11582	21.367	4.71482	7.2999	7.58154	-1.57991e-06	1.24882	0.220659	0.341644	0.354825	0.0584465	1.60802	3.87557e-06	6.52406e-06	1.16763e-05	2.36043e-06	3.48155e-05
		SA01 09	0.0595188	19.9161	4.39475	6.80422	7.06652	4.46049e-06	1.16389	0.220663	0.341645	0.354815	0.05844	1.60795	3.87776e-06	5.8142e-06	1.36739e-05	3.14356e-06	4.57824e-05	0.0200349	0.0141213	0.00320134	-0.0565276	0.0332014
		MudTank 10	0.134707	21.4722	4.73803	7.33568	7.61839	-1.8517e-05	1.25483	0.220659	0.341636	0.354802	0.0584401	1.60792	4.20842e-06	6.02734e-06	1.29053e-05	2.81693e-06	4.41289e-05
		SA01 10	0.0599115	19.9859	4.41019	6.82812	7.09129	-1.5323e-05	1.16805	0.220665	0.341648	0.354815	0.0584439	1.60793	3.9253e-06	6.30739e-06	1.20479e-05	2.48092e-06	4.35771e-05	0.0114132	0.015585	-0.0187515	0.0317941	0.0112479
		MudTank 11	0.128553	21.4762	4.73908	7.3373	7.62062	-3.07357e-06	1.25514	0.220667	0.341649	0.354841	0.0584439	1.60804	3.90032e-06	6.52564e-06	1.20763e-05	2.86972e-06	3.75029e-05
		SA01 11	0.0591766	19.987	4.41039	6.82853	7.09205	6.16035e-08	1.16809	0.220663	0.341648	0.354832	0.0584422	1.60803	4.14346e-06	6.74443e-06	1.36341e-05	2.59163e-06	4.32525e-05	-0.00837999	0.0117467	-0.00157277	-0.00618698	0.0284272
		MudTank 12	0.122886	21.219	4.68222	7.24925	7.52901	-9.3486e-06	1.24006	0.220662	0.34164	0.354824	0.0584412	1.608	4.06164e-06	6.29333e-06	1.19269e-05	2.21108e-06	4.06349e-05
		SA01 12	0.0580951	19.4515	4.29226	6.64555	6.90194	-1.19194e-06	1.13689	0.220664	0.341647	0.354827	0.0584472	1.608	3.91711e-06	5.80812e-06	1.23444e-05	2.50938e-06	3.95655e-05	-0.00708098	0.00586076	-0.00932621	0.0637483	0.0206735
		MudTank 13	0.118203	21.2677	4.69314	7.26608	7.54653	4.49437e-06	1.243	0.22067	0.34165	0.354837	0.0584458	1.608	3.99678e-06	7.07341e-06	1.35492e-05	2.79509e-06	4.68292e-05
		SA01 13	0.0605632	19.5564	4.31534	6.68134	6.93901	-5.35661e-06	1.14298	0.22066	0.341643	0.354819	0.0584449	1.60798	4.42291e-06	5.73993e-06	1.22455e-05	2.28637e-06	3.90064e-05	-0.0351443	-0.0140506	-0.0405971	0.012858	-0.0105983
		MudTank 14	0.116993	21.335	4.70791	7.28901	7.57024	8.31416e-07	1.24686	0.220666	0.341647	0.354829	0.0584425	1.60799	3.59032e-06	6.46918e-06	1.20199e-05	2.81087e-06	4.03309e-05
		SA01 14	0.0559695	19.7689	4.36216	6.75388	7.01441	-1.95488e-06	1.15535	0.220658	0.341642	0.35482	0.0584427	1.60801	4.30082e-06	5.90305e-06	1.21528e-05	2.73203e-06	3.8774e-05	-0.0316681	-0.0107886	-0.0115287	0.0219123	0.0184709
		MudTank 15	0.116057	21.383	4.71842	7.30536	7.58704	-1.01987e-05	1.24961	0.220663	0.341644	0.354819	0.0584403	1.60797	4.99502e-06	7.22612e-06	1.47381e-05	3.24636e-06	4.77885e-05
		SA01 15	0.0583541	20.1257	4.44079	6.87552	7.14069	-4.00419e-06	1.17615	0.220653	0.341629	0.354805	0.0584402	1.60798	4.44706e-06	7.21593e-06	1.25696e-05	2.66732e-06	4.00689e-05	-0.0512482	-0.0441871	-0.0475397	-0.0115275	-0.0175411
		MudTank 16	0.116421	21.4622	4.73596	7.33242	7.61529	-2.24293e-06	1.25428	0.220665	0.341644	0.354825	0.0584415	1.60798	3.96527e-06	5.48008e-06	1.21673e-05	2.63058e-06	4.18537e-05
		SA01 16	0.057246	19.4153	4.28424	6.63312	6.88901	-8.71295e-06	1.13471	0.220662	0.341643	0.354823	0.0584442	1.60799	4.38208e-06	5.96154e-06	1.14749e-05	2.43452e-06	3.63906e-05	-0.00699824	0.00736105	0.0113381	0.0534982	0.0413385
		MudTank 17	0.134002	21.419	4.72638	7.31751	7.59974	1.27521e-05	1.25174	0.220663	0.341637	0.354813	0.0584407	1.60794	4.33951e-06	6.70084e-06	1.28917e-05	2.23933e-06	4.36981e-05
		SA01 17	0.0581467	19.27	4.25214	6.58357	6.83774	-4.04946e-06	1.12626	0.220661	0.341648	0.354838	0.0584463	1.60807	5.04978e-06	6.07929e-06	1.27606e-05	2.4075e-06	3.8298e-05	-0.0081161	0.030658	0.0517901	0.0618623	0.0817916
		MudTank 18	0.126877	21.3202	4.70457	7.28381	7.56494	5.04985e-06	1.24605	0.220663	0.341639	0.354826	0.0584446	1.608	4.12956e-06	6.35397e-06	1.12036e-05	2.05936e-06	3.23602e-05

## Sheet: SA01_Solution
SN-MC-ICP-MS Zr isotopic data for SA01 zircon
Sample	δ94ZrSRM3169	2SE	δ94ZrIPGP-Zr	2SE
SA01	0	0.03	0.033	0.03
	0.01	0.03	0.0430003	0.03
	0	0.03	0.033	0.03
SA01_R1	-0.02	0.03	0.0129993	0.03
	0	0.03	0.033	0.03
	-0.02	0.03	0.0129993	0.03
SA01_R2	-0.02	0.03	0.0129993	0.03
	0	0.03	0.033	0.03
	-0.03	0.03	0.00299901	0.03

## Sheet: SA01_Self Bracket
LA-MC-ICP-MS Zr isotopic data for SA01 zircon (Self Bracket)
Session	Sample	89Y	90Zr	91Zr	92Zr	94Zr	95Mo	96Zr	91/90	92/90	94/90	96/90	94/91	91/90(2se)	92/90(2se)	94/90(2se)	96/90(2se)	94/91(2se)	δ 91/90	δ 92/90	δ 94/90	δ 96/90
1 (2021-01-11)	SA01 01	0.124348	30.7097	6.77966	10.4996	10.9219	8.25458e-05	1.80128	0.220766	0.341898	0.355647	0.0586548	1.61097	5.59004e-06	8.0981e-06	1.54389e-05	3.22111e-06	5.36664e-05
	SA01 02	0.126958	30.5402	6.74207	10.4417	10.8609	8.57073e-05	1.79113	0.22076	0.341898	0.355625	0.0586483	1.61091	6.83773e-06	9.79748e-06	1.7211e-05	3.21864e-06	5.62575e-05	-0.0373162	-0.0154584	-0.0646862	-0.098342
	SA01 03	0.123174	30.7002	6.77771	10.4967	10.9185	8.08389e-05	1.80068	0.220771	0.341909	0.355649	0.0586534	1.61094	7.38933e-06	1.03485e-05	2.15079e-05	3.31548e-06	6.65524e-05	0.0174179	-0.00377392	0.0313645	0.0388026
	SA01 04	0.116295	30.4006	6.71166	10.3947	10.812	8.79514e-05	1.78313	0.220773	0.341922	0.35565	0.0586539	1.61093	6.34979e-06	9.53993e-06	1.79096e-05	3.47136e-06	5.32411e-05	0.00857528	0.0306008	0.0182893	0.0262291
	SA01 05	0.111587	29.8793	6.59655	10.2162	10.6263	7.14074e-05	1.75247	0.220772	0.341915	0.355638	0.0586513	1.61088	6.96959e-06	9.37366e-06	1.7833e-05	3.55418e-06	5.9294e-05	0.00881568	-0.00771638	-0.0100138	-0.017637
	SA01 06	0.111412	30.2103	6.66948	10.3293	10.7439	7.09521e-05	1.77187	0.220768	0.341912	0.355634	0.0586508	1.6109	6.3001e-06	9.04675e-06	1.75156e-05	2.92335e-06	5.03414e-05	-0.0243385	-0.000865065	-0.00620217	0.0210651
	SA01 07	0.110269	29.9055	6.60236	10.225	10.6355	9.59221e-05	1.75391	0.220774	0.341911	0.355634	0.0586479	1.61085	5.59702e-06	8.55723e-06	1.64817e-05	3.51926e-06	5.75679e-05	0.0324144	-0.0107282	-0.00527014	-0.0488986
	SA01 08	0.111711	29.8408	6.58782	10.2031	10.6126	8.78571e-05	1.75019	0.220765	0.341916	0.355637	0.0586506	1.61093	6.53176e-06	8.7393e-06	1.58523e-05	2.84055e-06	5.29183e-05	-0.0199635	0.0135781	0.0142517	0.0568814
	SA01 09	0.120767	29.8161	6.58238	10.1945	10.6036	8.3645e-05	1.74863	0.220766	0.341912	0.355631	0.0586468	1.6109	6.28587e-06	8.98729e-06	1.79203e-05	3.16478e-06	5.82462e-05	0.00456086	-0.0184103	-0.0218168	-0.0460756
	SA01 10	0.11681	29.8464	6.58902	10.2051	10.6146	8.24866e-05	1.75045	0.220764	0.341921	0.35564	0.0586483	1.61095	6.09093e-06	8.77901e-06	1.66918e-05	2.87766e-06	5.71171e-05	-0.00930904	0.0273206	0.0181515	0.0239867
	SA01 11	0.11424	29.8215	6.5836	10.1963	10.6057	8.59901e-05	1.74895	0.220767	0.341912	0.355636	0.058647	1.61091	7.66432e-06	1.08655e-05	1.92537e-05	3.62647e-06	5.3635e-05	0.00725133	-0.0134328	0.0121225	0.00608249
	SA01 12	0.110494	29.422	6.49539	10.0597	10.4632	9.53583e-05	1.72546	0.220766	0.341911	0.355624	0.0586449	1.61086	7.14462e-06	9.44037e-06	1.87765e-05	3.01911e-06	5.13175e-05	-0.00236924	0.00725504	-0.0281305	0.00444504
	SA01 13	0.10847	29.3689	6.48368	10.0414	10.4446	7.85087e-05	1.72228	0.220766	0.341905	0.355631	0.0586424	1.61089	6.60278e-06	8.49212e-06	1.84381e-05	4.04166e-06	6.02128e-05	0.000438979	-0.0246471	0.0173315	-0.0433424
	SA01 14	0.109339	29.7748	6.57328	10.1805	10.5887	8.99539e-05	1.74615	0.220766	0.341917	0.355626	0.0586449	1.61087	5.78531e-06	8.64945e-06	1.72711e-05	3.61073e-06	5.8454e-05	-0.00452782	0.0186616	-0.0162132	0.00367097
	SA01 15	0.108974	29.3764	6.48541	10.0443	10.4473	7.90972e-05	1.72285	0.220769	0.341915	0.355633	0.0586471	1.61089	6.55969e-06	9.07828e-06	1.82922e-05	2.96881e-06	5.80461e-05	0.00581462	0.0122369	0.0352406	0.0501912
	SA01 16	0.110276	29.1778	6.44154	9.97608	10.3761	6.36052e-05	1.71109	0.220768	0.341905	0.355615	0.0586433	1.61081	6.68558e-06	9.2773e-06	1.87389e-05	3.00368e-06	5.91894e-05	-0.00358944	-0.0251538	-0.0522674	-0.0408414
	SA01 17	0.115657	29.1899	6.44424	9.9804	10.3809	6.92777e-05	1.71182	0.220769	0.341913	0.355634	0.0586443	1.61088	6.09081e-06	8.36973e-06	1.59842e-05	2.51275e-06	4.23978e-05	0.00668419	0.0263972	0.0736971	0.0645151
	SA01 18	0.122955	29.9086	6.60286	10.2258	10.6356	7.67265e-05	1.75378	0.220768	0.341902	0.3556	0.0586377	1.61074	7.02689e-06	1.1556e-05	2.1046e-05	3.82313e-06	6.89798e-05	-0.020961	-0.0359549	-0.095716	-0.12379
	SA01 19	0.109516	29.438	6.49919	10.0653	10.4692	7.18298e-05	1.72642	0.220775	0.341916	0.355635	0.0586457	1.61085	6.25215e-06	1.13741e-05	1.8242e-05	3.37503e-06	5.58482e-05	0.0256869	0.013955	0.0397326	0.0683021
	SA01 20	0.107307	29.1848	6.44316	9.97887	10.3793	9.12674e-05	1.71156	0.220771	0.34192	0.355641	0.0586457	1.6109	5.67551e-06	7.07211e-06	1.55617e-05	2.45915e-06	5.15435e-05	0.00644308	0.00792875	0.0285533	0.022996
	SA01 21	0.107518	29.1009	6.42446	9.95018	10.3491	7.2258e-05	1.70657	0.220765	0.341919	0.355627	0.0586429	1.61089	6.36988e-06	8.14633e-06	1.61264e-05	3.6052e-06	5.97355e-05	-0.0271504	-0.0013775	-0.0262843	-0.0468948
	SA01 22	0.108788	28.9649	6.39457	9.90365	10.3009	6.09526e-05	1.69867	0.22077	0.341919	0.355631	0.0586457	1.61087	6.19557e-06	8.61412e-06	1.72303e-05	3.28629e-06	6.33676e-05	0.0126007	0.0127662	0.0211049	0.0736389
	SA01 23	0.111224	29.1401	6.43325	9.96331	10.3629	6.46771e-05	1.70878	0.22077	0.34191	0.355621	0.0586398	1.61082	6.51093e-06	1.02913e-05	1.835e-05	3.23999e-06	6.02856e-05	0.00399597	-0.0210001	-0.00737017	-0.0757488
	SA01 24	0.11347	29.0718	6.41813	9.94014	10.3385	6.20838e-05	1.70487	0.220768	0.341916	0.355616	0.0586428	1.61082	6.45701e-06	9.97211e-06	2.02213e-05	4.73475e-06	6.49162e-05	-0.000937922	0.000296555	-0.0137131	0.0142493
	SA01 25	0.114303	28.2825	6.24383	9.67041	10.0579	6.2948e-05	1.65862	0.220766	0.341921	0.355621	0.0586442	1.61085	5.75395e-06	9.83654e-06	1.79261e-05	3.338e-06	5.75104e-05	-0.000366644	0.0322101	0.0227201	0.0758433
	SA01 26	0.12309	29.3795	6.48596	10.045	10.4477	7.25673e-05	1.72272	0.220765	0.341904	0.355609	0.0586366	1.61081	6.7359e-06	9.01433e-06	1.69576e-05	3.1445e-06	5.25778e-05	-0.00512653	-0.0388075	-0.0354535	-0.0632262
	SA01 27	0.121593	28.741	6.34503	9.82698	10.221	6.27951e-05	1.68528	0.220765	0.341914	0.355623	0.0586365	1.61086	6.76316e-06	1.04202e-05	1.87841e-05	3.56071e-06	6.06107e-05	-0.00843705	-0.00413992	0.00830135	-0.0538635
	SA01 28	0.121243	28.678	6.33124	9.80578	10.1988	8.63646e-05	1.68176	0.22077	0.341927	0.35563	0.0586426	1.61086	6.74402e-06	8.37202e-06	1.62977e-05	3.23377e-06	4.77187e-05	0.0097758	0.0180213	0.00150559	0.024432
	SA01 29	0.107483	28.7494	6.34702	9.83022	10.2244	6.54604e-05	1.68604	0.22077	0.341927	0.355637	0.058646	1.61089	6.89034e-06	9.9127e-06	1.56404e-05	3.08372e-06	4.73541e-05	0.00147433	-0.0019069	0.0208219	0.0621233
	SA01 30	0.115717	28.4454	6.27988	9.72628	10.116	7.85609e-05	1.66809	0.22077	0.341928	0.355629	0.058642	1.61086	6.30734e-06	8.14764e-06	1.62391e-05	2.93233e-06	4.75714e-05	-0.00751485	-0.0040171	-0.0285173	-0.0538717
	SA01 31	0.107791	28.4033	6.27068	9.71204	10.1014	7.49112e-05	1.6657	0.220773	0.341933	0.355641	0.0586443	1.61089	6.54515e-06	8.06166e-06	1.40574e-05	2.82901e-06	4.83764e-05
2 (2021-01-19)	SA01 01	0.0269951	19.9012	4.38846	6.79065	7.04314	9.96997e-06	1.15897	0.220512	0.341217	0.353902	0.0582359	1.60491	7.84164e-06	9.35623e-06	1.89325e-05	3.69291e-06	6.11166e-05
	SA01 02	0.0420178	20.7574	4.57718	7.08286	7.34605	1.06262e-05	1.20883	0.220508	0.34122	0.353895	0.0582356	1.60491	9.33402e-06	1.12606e-05	2.48645e-05	3.79584e-06	7.52664e-05	-0.0127739	0.0167219	-0.00628089	0.0183417
	SA01 03	0.0416377	20.6004	4.54258	7.0291	7.29042	7.63284e-06	1.19964	0.220509	0.341211	0.353893	0.0582333	1.60489	8.3193e-06	1.08738e-05	2.26625e-05	3.9926e-06	7.15608e-05	0.00128826	-0.0108365	0.00429207	-0.033603
	SA01 04	0.0416322	20.621	4.54714	7.03613	7.29763	2.017e-05	1.20088	0.220509	0.341209	0.353888	0.0582348	1.60486	8.11024e-06	1.12563e-05	2.19795e-05	4.27216e-06	7.1868e-05	0.00350065	0.0176476	-0.000571541	0.0372685
	SA01 05	0.0412776	20.4568	4.51091	6.97984	7.23943	1.52408e-05	1.19126	0.220508	0.341196	0.353883	0.058232	1.60485	8.4706e-06	1.27797e-05	2.3289e-05	4.0557e-06	7.78054e-05	0.00625175	-0.0404675	-0.0146187	-0.00752865
	SA01 06	0.0416437	20.6652	4.55679	7.05121	7.31328	9.25318e-06	1.20335	0.220505	0.34121	0.353888	0.05823	1.6049	8.20962e-06	1.1052e-05	2.25244e-05	4.17804e-06	7.14722e-05	-0.00535436	0.0256774	0.0411514	-0.0191798
	SA01 07	0.0421668	20.929	4.61494	7.14118	7.4062	2.39339e-05	1.21873	0.220503	0.341206	0.353865	0.0582303	1.60481	9.53096e-06	1.33638e-05	2.51683e-05	3.99381e-06	7.12737e-05	-0.00625329	0.00869135	-0.0245375	0.049378
	SA01 08	0.0408038	20.2974	4.47569	6.92545	7.18253	-6.17725e-07	1.18184	0.220504	0.341197	0.353859	0.0582249	1.60477	7.64438e-06	1.13537e-05	2.36742e-05	3.88397e-06	6.78024e-05	0.0186979	-0.020062	-0.0081897	-0.023295
	SA01 09	0.0400918	19.9736	4.40416	6.81506	7.06794	5.27538e-06	1.16292	0.220498	0.341201	0.353858	0.0582221	1.60482	8.46025e-06	9.82375e-06	2.17164e-05	3.21813e-06	5.96374e-05	-0.0243613	0.0196223	0.0193039	-0.032086
	SA01 10	0.0405855	20.2313	4.46105	6.90279	7.15883	1.38314e-07	1.17794	0.220501	0.341192	0.353844	0.0582231	1.60473	7.45938e-06	1.01816e-05	1.88429e-05	2.99786e-06	5.96409e-05	0.00757706	-0.0213678	-0.0448954	-0.0425255
	SA01 11	0.0400169	19.9838	4.40647	6.81844	7.07154	1.75951e-06	1.16364	0.220502	0.341197	0.353862	0.0582291	1.6048	8.736e-06	1.01077e-05	1.95621e-05	3.4402e-06	5.82602e-05	0.00575849	0.0134493	0.0336442	0.0905094
	SA01 12	0.041225	20.5409	4.5293	7.00848	7.26864	5.24877e-06	1.19601	0.2205	0.341194	0.353856	0.0582245	1.60479	8.23522e-06	1.2131e-05	2.22901e-05	4.43002e-06	6.74266e-05	-0.00996096	-0.00213166	-0.011647	-0.0547916
	SA01 13	0.041385	20.6291	4.54877	7.0385	7.29989	1.49737e-05	1.20118	0.220502	0.341191	0.353858	0.0582263	1.60478	8.18085e-06	1.00124e-05	2.45613e-05	4.53147e-06	8.01807e-05	0.0115229	-0.00454691	-0.014346	-0.00620289
	SA01 14	0.0396334	19.7965	4.36514	6.75445	7.00549	-5.59373e-06	1.15274	0.2205	0.341192	0.35387	0.0582288	1.60486	9.0479e-06	1.09485e-05	2.29606e-05	3.66718e-06	7.04514e-05	-0.00355731	0.000960681	0.0477041	0.0536898
	SA01 15	0.0386605	19.413	4.28055	6.62361	6.86936	-5.33886e-06	1.13034	0.220498	0.341192	0.353849	0.0582251	1.60477	7.96782e-06	1.14646e-05	2.10425e-05	3.81306e-06	6.8072e-05	0.00117495	0.00685031	-0.000572984	-0.0196346
	SA01 16	0.0331025	16.7231	3.68739	5.70571	5.91707	2.36052e-05	0.973664	0.220497	0.341188	0.353828	0.0582236	1.60468	8.64979e-06	1.02328e-05	2.13756e-05	4.13354e-06	6.83889e-05	-0.0125263	-0.0169943	-0.073205	-0.0700419
	SA01 17	0.0409196	20.2005	4.45423	6.89234	7.14821	2.86555e-05	1.17629	0.220501	0.341195	0.353858	0.0582303	1.6048	9.56656e-06	1.08356e-05	2.33038e-05	3.0874e-06	6.75722e-05	0.0210463	0.0211631	0.0426655	0.118598
	SA01 18	0.0403758	19.9895	4.40759	6.82017	7.07352	1.18991e-05	1.16386	0.220495	0.341188	0.353859	0.0582232	1.60484	7.6143e-06	1.08281e-05	1.95659e-05	3.67446e-06	7.23789e-05	-0.0239274	-0.0352711	-0.0133649	-0.103863
	SA01 19	0.0423876	21.0245	4.63594	7.17372	7.44006	1.34191e-05	1.22425	0.2205	0.341204	0.353869	0.0582282	1.60485	8.54544e-06	1.22397e-05	2.33253e-05	5.2342e-06	7.54877e-05	-0.0137857	0.00984118	-0.0128196	0.00834615
	SA01 20	0.0419421	20.7154	4.568	7.06844	7.33103	-7.40892e-06	1.20632	0.220511	0.341214	0.353888	0.0582322	1.60485	8.54146e-06	1.22257e-05	2.25828e-05	4.04571e-06	7.11005e-05	0.0341201	0.0261937	0.0481867	0.0569213
	SA01 21	0.0415216	20.6899	4.56231	7.05958	7.32172	1.24821e-05	1.20478	0.220508	0.341207	0.353873	0.0582296	1.60481	9.06671e-06	1.20419e-05	2.53481e-05	4.02929e-06	7.48596e-05	0.00963736	-0.0013513	0.000751751	0.00961567
	SA01 22	0.0412749	20.6191	4.54651	7.03526	7.29634	1.93385e-06	1.20058	0.2205	0.3412	0.353858	0.0582259	1.6048	9.81245e-06	1.12418e-05	2.50731e-05	4.10508e-06	7.95109e-05	-0.0450061	-0.0290121	-0.0674168	-0.099778
	SA01 23	0.0414026	20.6981	4.56417	7.06249	7.32496	1.13634e-05	1.20535	0.220511	0.341212	0.35389	0.0582338	1.60486	8.79072e-06	1.2302e-05	2.69265e-05	4.2766e-06	8.7981e-05	0.0402982	0.0176311	0.0482203	0.114595
	SA01 24	0.0417696	20.888	4.60595	7.12732	7.39215	1.20465e-05	1.2163	0.220505	0.341213	0.353888	0.0582283	1.60489	8.93127e-06	1.26872e-05	2.40536e-05	4.4532e-06	6.55438e-05	-0.0251337	0.00340022	-0.011665	-0.0915924
	SA01 25	0.0421756	21.2646	4.68907	7.25577	7.52555	6.19988e-06	1.23833	0.22051	0.341212	0.353894	0.0582335	1.60489	8.14881e-06	1.12389e-05	2.50493e-05	4.09218e-06	8.49152e-05	0.0177538	0.00411633	0.01802	0.0830756
	SA01 26	0.040365	20.4505	4.50952	6.97792	7.23728	4.91882e-09	1.19083	0.220508	0.341207	0.353888	0.058229	1.60488	7.56649e-06	1.21587e-05	2.23667e-05	3.93797e-06	6.96663e-05	-0.000581193	0.00731356	0.00850745	-0.0424892
	SA01 27	0.0406556	20.6561	4.55481	7.0479	7.30985	2.75742e-06	1.20282	0.220505	0.341198	0.353875	0.0582295	1.60484	8.42954e-06	1.32507e-05	2.82165e-05	4.63399e-06	8.69782e-05	-0.00792433	-0.0178087	-0.0242471	-0.00464494
	SA01 28	0.038208	19.4805	4.2956	6.6468	6.89385	6.01558e-07	1.13438	0.220506	0.341201	0.35388	0.0582306	1.60485	9.21063e-06	8.6735e-06	2.08867e-05	3.96258e-06	5.89941e-05	-0.00202731	-0.0131198	0.0103389	0.0118179
	SA01 29	0.0391692	19.9471	4.39853	6.80626	7.05894	1.25224e-05	1.16155	0.220508	0.341213	0.353877	0.0582302	1.60483	8.78062e-06	1.22615e-05	2.5605e-05	4.59177e-06	7.4427e-05	0.00421466	0.00835795	-0.0383872	-0.0556889
	SA01 30	0.0396575	20.203	4.45494	6.89368	7.14994	1.81539e-05	1.17656	0.220508	0.341219	0.353902	0.0582363	1.60494	8.26133e-06	1.08306e-05	1.97037e-05	3.57172e-06	5.95053e-05	0.00414758	0.01405	0.0533531	0.106337
	SA01 31	0.0403416	20.5641	4.53453	7.01687	7.27756	5.48301e-06	1.19748	0.220506	0.341215	0.353889	0.0582301	1.60489	9.30399e-06	1.35823e-05	2.96701e-05	4.76103e-06	0.00010123	0.0031724	0.0111284	-0.0211949	-0.0398967
	SA01 32	0.0408691	20.765	4.57876	7.08515	7.34862	-4.4014e-06	1.20913	0.220503	0.341204	0.35389	0.0582285	1.60492	9.6383e-06	1.31958e-05	2.47154e-05	4.72698e-06	7.192e-05	-0.00874675	-0.0257366	-0.00589373	-0.0404904
	SA01 33	0.0407308	20.6851	4.56116	7.05803	7.3205	1.0339e-05	1.20455	0.220504	0.341211	0.353896	0.0582316	1.60495	8.15977e-06	1.16872e-05	2.30347e-05	4.28063e-06	7.04225e-05
3 (2021-01-20)	SA01 01	0.0400506	19.8365	4.37414	6.76914	7.02131	-2.47912e-06	1.15553	0.220509	0.341245	0.353955	0.0582518	1.60517	7.85273e-06	1.0356e-05	1.95189e-05	3.06253e-06	6.67683e-05
	SA01 02	0.0397309	19.6874	4.34155	6.71844	6.96903	-1.78239e-05	1.14683	0.220523	0.341254	0.353981	0.0582518	1.60518	8.42066e-06	1.03324e-05	1.97301e-05	3.53042e-06	6.04217e-05	0.0532838	0.052473	0.104256	0.0909214
	SA01 03	0.0408382	20.0469	4.42063	6.84057	7.0953	1.1966e-05	1.16756	0.220514	0.341228	0.353932	0.0582411	1.60503	8.17464e-06	9.53138e-06	2.10829e-05	3.18884e-06	6.46544e-05	-0.0169278	-0.0568057	-0.106352	-0.146351
	SA01 04	0.0415185	20.7307	4.57138	7.07418	7.33791	8.51721e-06	1.20753	0.220512	0.34124	0.353959	0.0582475	1.60517	8.79831e-06	1.02905e-05	2.27372e-05	3.52064e-06	6.89878e-05	0.00646351	0.0392831	0.0740697	0.0983149
	SA01 05	0.0391392	19.609	4.32394	6.69111	6.94036	-1.85524e-05	1.14209	0.220507	0.341225	0.353934	0.0582424	1.60509	9.26825e-06	1.17169e-05	2.46862e-05	4.3385e-06	7.14848e-05	-0.0380846	-0.0551903	-0.0742255	-0.0830834
	SA01 06	0.0400612	19.9959	4.40951	6.82363	7.07789	1.54153e-05	1.16473	0.220519	0.341249	0.353961	0.058247	1.60512	9.06609e-06	1.20195e-05	2.41418e-05	3.92499e-06	7.03549e-05	0.0313281	0.0416816	0.0528182	0.0291823
	SA01 07	0.0414211	20.7014	4.56504	7.06426	7.32735	1.8034e-05	1.20583	0.220518	0.341243	0.35395	0.0582482	1.60509	7.88927e-06	1.0487e-05	2.10533e-05	3.46903e-06	6.75747e-05	-0.0014695	0.0124223	0.011768	0.0643284
	SA01 08	0.0408203	20.4484	4.50924	6.97763	7.23745	1.93594e-05	1.19097	0.220517	0.341229	0.353931	0.058242	1.60501	8.08013e-06	9.60871e-06	2.2166e-05	3.7511e-06	7.00334e-05	0.0130555	-0.0191804	-0.0255078	-0.0448367
	SA01 09	0.0412279	20.6689	4.55772	7.05285	7.31548	1.81742e-05	1.20379	0.22051	0.341229	0.353931	0.0582409	1.60506	9.07478e-06	1.20716e-05	2.4378e-05	3.70067e-06	6.46679e-05	-0.0281998	-0.000741282	-0.0233127	-0.0608551
	SA01 10	0.0410351	20.5614	4.53413	7.01619	7.27774	5.06184e-06	1.19766	0.220515	0.341229	0.353947	0.0582469	1.60509	7.0205e-06	1.13533e-05	1.97368e-05	3.57256e-06	6.71309e-05	-0.00950937	-0.0325589	-0.0245702	0.035657
	SA01 11	0.038983	19.5727	4.31628	6.67919	6.92833	1.76053e-05	1.14008	0.220525	0.341251	0.35398	0.0582488	1.60517	8.84406e-06	1.04625e-05	2.1023e-05	4.24872e-06	5.59336e-05	0.0436955	0.0436077	0.0968	0.0292753
	SA01 12	0.0364731	18.3711	4.0511	6.26901	6.50237	5.37566e-06	1.07007	0.220516	0.341243	0.353944	0.0582473	1.60508	8.88347e-06	1.14028e-05	2.43848e-05	3.72038e-06	7.85782e-05	-0.0221147	-0.000553692	-0.0457173	0.0158609
	SA01 13	0.0416082	20.8648	4.60103	7.11987	7.38505	9.15323e-06	1.21527	0.220516	0.341235	0.353942	0.0582439	1.60506	7.73511e-06	1.25309e-05	2.27887e-05	4.13535e-06	8.42292e-05	0.0189256	0.00744552	0.0130776	-0.00678457
	SA01 14	0.0410455	20.5842	4.53901	7.02387	7.28548	1.86561e-05	1.19888	0.220508	0.341223	0.353929	0.0582413	1.60506	9.04197e-06	1.34593e-05	2.48631e-05	4.53379e-06	7.19916e-05	-0.0284314	-0.0269432	-0.0293095	-0.0526305
	SA01 15	0.0413871	20.7129	4.56748	7.06793	7.33127	3.3231e-05	1.20646	0.220512	0.341229	0.353938	0.0582448	1.60507	8.47144e-06	1.33066e-05	2.80801e-05	5.37119e-06	9.2553e-05	0.00752986	-0.000629164	0.0184073	0.0326657
	SA01 16	0.0412004	20.6276	4.54869	7.03895	7.30099	2.77528e-05	1.20148	0.220513	0.341235	0.353933	0.0582446	1.60504	9.40919e-06	1.36515e-05	2.95883e-05	5.02091e-06	9.62877e-05	0.0164518	0.00612594	-0.0026466	0.00954975
	SA01 17	0.0415934	20.7872	4.58374	7.09342	7.35739	7.39209e-06	1.21074	0.220507	0.341238	0.353931	0.0582432	1.60507	8.51309e-06	1.17249e-05	2.52548e-05	3.96074e-06	8.56825e-05	-0.0267364	0.00366311	-0.00938527	-0.0281321
	SA01 18	0.0408248	20.384	4.49497	6.95586	7.21479	9.83041e-06	1.1873	0.220513	0.341237	0.353935	0.0582451	1.60505	9.28367e-06	1.30608e-05	2.80205e-05	5.1697e-06	8.39141e-05	-0.000589565	0.00181902	-0.0114385	0.0186002
	SA01 19	0.0419959	20.9069	4.61039	7.13425	7.40007	-9.38514e-06	1.21775	0.220519	0.341236	0.353947	0.0582448	1.60506	7.74359e-06	1.17853e-05	2.36621e-05	5.04825e-06	7.73395e-05	0.0243263	0.0135377	0.0509103	0.032396
	SA01 20	0.0428214	20.7266	4.57054	7.07251	7.3358	2.91044e-05	1.20717	0.220514	0.341225	0.353923	0.0582408	1.60499	7.75967e-06	1.35825e-05	2.60844e-05	5.24999e-06	8.23596e-05	-0.0220848	-0.0322009	-0.0722549	-0.0992856
	SA01 21	0.042787	20.5457	4.53075	7.011	7.27231	1.97354e-05	1.19677	0.220519	0.341236	0.35395	0.0582483	1.60508	7.57446e-06	1.06543e-05	2.41573e-05	3.52999e-06	7.68328e-05	0.0189148	0.00751478	0.0398675	0.0699326
	SA01 22	0.0414259	19.8755	4.38289	6.78244	7.03508	7.512e-06	1.15773	0.220516	0.341242	0.353949	0.0582477	1.6051	8.88856e-06	1.26945e-05	2.37605e-05	4.38634e-06	7.48993e-05	-0.000547079	0.0232674	0.0155702	0.0221087
	SA01 23	0.0412122	19.8406	4.37512	6.77028	7.02243	2.14695e-05	1.15563	0.220513	0.341232	0.353937	0.0582445	1.60507	8.70805e-06	1.05878e-05	2.28114e-05	4.72708e-06	7.00279e-05	-0.018709	-0.0234127	-0.0281956	-0.0402379
	SA01 24	0.0413253	19.9429	4.3978	6.80538	7.05884	1.73909e-05	1.16162	0.220518	0.341239	0.353945	0.058246	1.60507	9.38381e-06	1.34013e-05	2.43875e-05	4.51092e-06	7.5902e-05	0.0182408	0.00206575	-8.57885e-05	0.00261102
	SA01 25	0.0403618	19.581	4.31792	6.68195	6.9309	6.38749e-06	1.14056	0.220515	0.341243	0.353953	0.0582472	1.60512	7.77079e-06	1.32025e-05	2.59686e-05	4.60022e-06	8.31978e-05	0.00934964	0.0149624	0.0353766	0.0318911
	SA01 26	0.04004	19.5224	4.30487	6.66184	6.90983	4.69301e-06	1.13711	0.220508	0.341238	0.353936	0.0582447	1.6051	1.04855e-05	1.2302e-05	2.65331e-05	4.79897e-06	7.37545e-05	-0.0290592	-0.0165178	-0.0454307	-0.0200533
	SA01 27	0.0409962	20.0349	4.41798	6.83684	7.0915	1.54567e-05	1.16695	0.220513	0.341244	0.353951	0.0582445	1.60512	8.605e-06	1.30315e-05	2.30283e-05	4.72102e-06	7.19991e-05	0.0239475	0.0406905	0.0496529	0.0196427
	SA01 28	0.0399893	19.7446	4.35388	6.73733	6.98836	2.45362e-05	1.14999	0.220509	0.341222	0.353931	0.058242	1.60507	1.0054e-05	1.34487e-05	2.64548e-05	4.45746e-06	7.36671e-05	-0.0232256	-0.0492983	-0.0303928	-0.0638963
	SA01 29	0.0387541	19.2104	4.23619	6.55531	6.79934	9.47624e-06	1.11898	0.220514	0.341233	0.353933	0.0582469	1.60504	8.51422e-06	1.14772e-05	2.53782e-05	4.50502e-06	8.27009e-05	0.00193263	0.000101926	-0.0213114	0.0745577
	SA01 30	0.0397947	19.5606	4.31351	6.67503	6.92365	-8.80885e-06	1.13931	0.220519	0.341245	0.353949	0.0582432	1.60508	9.24048e-06	1.33297e-05	2.76252e-05	5.39245e-06	8.44433e-05	0.0353699	0.020543	0.027467	-0.0607057
	SA01 31	0.0406148	19.8626	4.37988	6.77805	7.03048	1.90593e-05	1.15696	0.220507	0.341243	0.353947	0.0582466	1.60515	7.28026e-06	1.3078e-05	2.64927e-05	4.96672e-06	9.32985e-05	-0.0435719	0.00388949	-0.0093269	0.0226657
	SA01 32	0.039013	19.081	4.20767	6.51121	6.75386	-1.08575e-05	1.11144	0.220516	0.341238	0.35395	0.0582473	1.6051	9.09726e-06	1.25786e-05	2.46542e-05	4.07707e-06	7.84765e-05	0.03792	-0.0115278	0.0180397	0.0234195
	SA01 33	0.0398265	19.5089	4.30187	6.65727	6.90511	1.13495e-05	1.13632	0.220507	0.34124	0.353941	0.0582453	1.60512	9.24598e-06	1.1598e-05	2.38591e-05	4.13304e-06	7.31272e-05	-0.0335524	0.00404966	-0.0109524	-0.0650268
	SA01 34	0.0401758	19.7434	4.35372	6.73731	6.98813	-4.66317e-06	1.15009	0.220513	0.34124	0.35394	0.0582508	1.60507	9.34097e-06	1.27923e-05	2.49054e-05	4.20353e-06	6.91103e-05	0.0228321	0.000675137	0.00302768	0.0841209
	SA01 35	0.0400626	19.7801	4.36175	6.74982	7.00107	1.07734e-06	1.15215	0.22051	0.34124	0.353937	0.0582466	1.60509	9.67093e-06	1.07838e-05	2.61068e-05	4.0106e-06	7.45231e-05	-0.0252646	-0.0198636	-0.0342761	-0.0670956
	SA01 36	0.0394753	19.5516	4.31148	6.67209	6.92055	8.42997e-06	1.1389	0.220517	0.341253	0.353958	0.0582502	1.60513	8.16164e-06	1.16432e-05	2.27958e-05	4.06886e-06	7.27467e-05	0.0343336	0.0319832	0.0432578	0.0705221
	SA01 37	0.0390226	19.3963	4.27709	6.61893	6.86541	1.44646e-05	1.12977	0.220509	0.341244	0.353948	0.0582455	1.60514	8.3707e-06	1.11275e-05	2.32054e-05	3.5157e-06	7.47765e-05	-0.0157433	-0.00568412	-0.00958817	-0.0887215
	SA01 38	0.0391339	19.4717	4.29367	6.64456	6.89204	9.8781e-06	1.13426	0.220508	0.34124	0.353945	0.0582512	1.60513	8.68923e-06	1.20177e-05	2.61821e-05	3.46717e-06	8.84212e-05	-0.0293993	-0.0006817	-0.00242877	0.105472
	SA01 39	0.0382122	19.0714	4.20565	6.50788	6.75033	5.79039e-06	1.11082	0.22052	0.341235	0.353944	0.0582446	1.60504	8.75278e-06	1.16681e-05	2.4767e-05	4.32596e-06	8.13805e-05	0.0308378	-0.0253085	-0.0457222	-0.108484
	SA01 40	0.0410944	20.4516	4.50998	6.97911	7.23944	7.01604e-06	1.19133	0.220519	0.341248	0.353975	0.0582507	1.60519	8.67862e-06	1.2767e-05	2.48925e-05	4.17346e-06	7.22554e-05	0.0105989	0.0352706	0.0790793	0.0940748
	SA01 41	0.0388416	19.3365	4.26398	6.5984	6.84429	-4.34821e-06	1.1263	0.220513	0.341237	0.35395	0.0582458	1.60512	9.14101e-06	1.1935e-05	2.46921e-05	4.76232e-06	6.8872e-05	-0.00645931	-0.00664588	-0.01364	-0.029654
	SA01 42	0.0390561	19.4197	4.28226	6.62666	6.87346	6.76876e-06	1.13111	0.220509	0.341231	0.353935	0.0582443	1.60508	9.41444e-06	1.22408e-05	2.73825e-05	4.1621e-06	8.04422e-05	-0.0269597	-0.0437815	-0.0660749	-0.0678222
	SA01 43	0.0395669	19.5064	4.30153	6.65667	6.90473	1.28839e-05	1.13628	0.220518	0.341254	0.353966	0.0582507	1.60516	8.71505e-06	1.17042e-05	2.65017e-05	4.08935e-06	8.04592e-05	0.0412327	0.0502605	0.0798818	0.0856511
	SA01 44	0.038942	19.1821	4.22982	6.5458	6.78946	2.39454e-07	1.11732	0.220508	0.341243	0.353941	0.0582472	1.60511	9.12486e-06	1.20971e-05	2.50821e-05	4.30225e-06	8.20035e-05	-0.0306217	-0.00203146	-0.013037	-0.0236297
	SA01 45	0.0395576	19.4969	4.29933	6.65307	6.90061	1.7606e-05	1.13565	0.220512	0.341233	0.353925	0.0582464	1.60501	9.06542e-06	1.22058e-05	2.49188e-05	4.6177e-06	8.2062e-05	0.00822629	-0.0434212	-0.064211	-0.0371332
	SA01 46	0.0392466	19.3413	4.26501	6.60031	6.84604	1.66641e-06	1.12665	0.220512	0.341253	0.353955	0.05825	1.60515	9.15248e-06	9.72845e-06	2.11e-05	3.72779e-06	7.62406e-05
4 (2021-01-20)	SA01 01	0.0400904	21.1521	4.66312	7.21427	7.47921	8.28106e-07	1.23046	0.220456	0.341065	0.353588	0.0581721	1.60389	8.1231e-06	1.00017e-05	1.88723e-05	3.27332e-06	6.93216e-05
	SA01 02	0.0397729	20.9548	4.61979	7.14736	7.40984	-7.66319e-06	1.21925	0.220465	0.341086	0.353612	0.0581852	1.60394	7.46244e-06	9.58187e-06	1.81246e-05	2.85878e-06	5.91682e-05	0.0246177	0.0159245	-0.0105085	0.0548307
	SA01 03	0.0400043	21.0274	4.63575	7.17237	7.43621	4.45816e-06	1.22362	0.220462	0.341096	0.353643	0.0581919	1.6041	8.02155e-06	9.85119e-06	1.5933e-05	3.17146e-06	5.87858e-05	-0.0299528	-0.0167051	-0.000158397	0.000421448
	SA01 04	0.0398936	21.001	4.63016	7.16384	7.42759	-2.17251e-06	1.22224	0.220473	0.341118	0.353673	0.0581986	1.60416	6.74079e-06	9.09356e-06	1.8342e-05	3.34632e-06	6.21163e-05	0.0184848	0.0219164	-0.0229699	-0.0258527
	SA01 05	0.0389322	20.4879	4.51712	6.98898	7.24711	5.6035e-06	1.19257	0.220475	0.341124	0.353721	0.0582082	1.60435	8.188e-06	1.11062e-05	2.20574e-05	3.96919e-06	6.98048e-05	-0.00401925	-0.0334191	0.0120251	-0.0280439
	SA01 06	0.0376359	19.7088	4.34542	6.72374	6.97224	-8.95519e-06	1.14748	0.22048	0.341153	0.353759	0.0582211	1.6045	8.49456e-06	1.02263e-05	2.1073e-05	2.92399e-06	6.28471e-05	-0.0156795	-0.00438327	-0.0264495	-0.0157735
	SA01 07	0.0375826	19.6304	4.32834	6.69765	6.94564	7.59947e-06	1.1432	0.220491	0.341186	0.353816	0.0582359	1.60468	7.52708e-06	1.00699e-05	1.95099e-05	3.4486e-06	6.34971e-05	0.0219302	0.0439748	0.0525026	0.120201
	SA01 08	0.0365105	19.0764	4.20622	6.50866	6.75002	-1.51035e-05	1.11095	0.220493	0.341188	0.353837	0.0582366	1.60476	8.14605e-06	1.03334e-05	2.21982e-05	3.43613e-06	7.00956e-05	-0.0128359	-0.0267189	0.00266239	-0.0386686
	SA01 09	0.0353167	18.4304	4.0639	6.28862	6.52177	1.48198e-05	1.07342	0.2205	0.341208	0.353855	0.0582419	1.60479	7.61701e-06	1.05069e-05	2.02322e-05	3.71958e-06	6.77579e-05	0.0212958	0.0363394	0.0197594	-0.0327294
	SA01 10	0.0325937	17.1383	3.77897	5.84767	6.06462	2.69048e-06	0.998321	0.220498	0.341204	0.353859	0.058251	1.60482	7.39662e-06	1.12247e-05	2.33597e-05	3.43629e-06	6.88044e-05	-0.0143072	-0.0197792	-0.029982	0.06587
	SA01 11	0.0342668	17.9455	3.95705	6.12327	6.35073	7.48489e-06	1.04537	0.220502	0.341213	0.353885	0.0582524	1.60491	8.11106e-06	1.04941e-05	2.20993e-05	3.74247e-06	6.79794e-05	0.00890167	-0.0304604	-0.0218199	-0.0932214
	SA01 12	0.0338971	17.7243	3.90827	6.04833	6.27319	7.52593e-06	1.03271	0.220502	0.341243	0.353926	0.0582646	1.60509	8.76162e-06	1.073e-05	2.2681e-05	3.67446e-06	7.4694e-05	-0.0400326	0.0289424	0.0155165	0.0954732
	SA01 13	0.0322803	16.8888	3.72433	5.76339	5.97797	2.22183e-06	0.984051	0.22052	0.341253	0.353956	0.0582658	1.6051	1.01122e-05	1.20327e-05	2.16792e-05	4.38526e-06	7.02015e-05	0.0550334	0.00828868	0.00247794	-0.0222684
	SA01 14	0.0324158	16.9138	3.72972	5.77198	5.98725	3.00006e-07	0.985556	0.220514	0.341258	0.353984	0.0582695	1.60527	8.30894e-06	9.57039e-06	2.06973e-05	3.68939e-06	7.26132e-05	-0.0222797	0.0084778	0.0529206	0.00150749
	SA01 15	0.0302528	15.9472	3.51664	5.4421	5.64492	8.55736e-06	0.929288	0.220517	0.341257	0.353975	0.0582731	1.6052	9.25306e-06	1.15242e-05	2.17369e-05	3.9528e-06	5.98094e-05	-0.0101399	-0.0237188	-0.0668063	-0.0408581
	SA01 16	0.032188	16.8848	3.72353	5.76231	5.97752	-8.16599e-06	0.984077	0.220525	0.341272	0.354013	0.0582814	1.60532	1.0235e-05	1.23991e-05	2.634e-05	3.53512e-06	6.93735e-05	0.00444962	9.09174e-05	0.0280848	0.0591318
	SA01 17	0.0318337	16.6315	3.66776	5.67611	5.8881	8.73801e-06	0.96933	0.220531	0.341286	0.354031	0.0582828	1.60536	9.04496e-06	1.20234e-05	2.03269e-05	3.93862e-06	6.57824e-05	0.0325268	0.0205851	0.0300941	-0.0211712
	SA01 18	0.031438	16.4032	3.61727	5.59821	5.80723	9.55525e-06	0.956088	0.220523	0.341287	0.354028	0.0582867	1.6054	8.6656e-06	1.17387e-05	2.24858e-05	3.50316e-06	7.03973e-05	-0.048634	-0.0224551	-0.0438986	0.0070144
	SA01 19	0.0319089	16.6134	3.66385	5.67024	5.88215	-1.45808e-05	0.968398	0.220536	0.341303	0.354056	0.0582898	1.60544	7.7487e-06	1.17395e-05	2.2736e-05	3.60738e-06	8.67359e-05	0.0484816	0.0291373	0.0351501	0.0276695
	SA01 20	0.0312276	16.4594	3.62975	5.6176	5.82767	1.3039e-05	0.959418	0.220527	0.3413	0.354059	0.0582897	1.60551	8.24449e-06	1.09656e-05	2.15744e-05	3.39406e-06	7.71147e-05	-0.0377703	-0.0133714	-0.000260593	-0.0241732
	SA01 21	0.0311185	16.3591	3.60777	5.58346	5.7922	7.28201e-07	0.953609	0.220536	0.341305	0.354062	0.0582923	1.60546	8.01149e-06	1.17172e-05	2.2145e-05	3.6251e-06	6.92508e-05	0.0204017	-0.0119357	-0.0379499	-0.0523788
	SA01 22	0.0312084	16.3175	3.59859	5.56948	5.77796	-6.90036e-06	0.95133	0.220535	0.341319	0.354092	0.0583011	1.60561	9.23114e-06	1.14877e-05	2.31246e-05	3.53328e-06	7.31835e-05	0.0124522	0.0480085	0.0849299	0.144962
	SA01 23	0.0301757	15.7934	3.48292	5.3903	5.59189	1.59633e-05	0.920641	0.220529	0.341299	0.354062	0.058293	1.60551	9.57427e-06	1.16979e-05	2.49103e-05	3.79797e-06	6.73063e-05	-0.0182748	-0.0239269	-0.0351691	-0.0638662
	SA01 24	0.0307181	16.0467	3.53881	5.47671	5.68153	-7.31554e-07	0.935407	0.220531	0.341297	0.354057	0.0582923	1.60548	9.28828e-06	1.11249e-05	2.26969e-05	4.09055e-06	7.62922e-05	-0.0003039	-0.0291458	-0.0351737	-0.0704026
	SA01 25	0.0311598	16.3713	3.61043	5.58779	5.79678	9.54818e-06	0.954447	0.220533	0.341314	0.354077	0.0582998	1.60555	9.75435e-06	1.25007e-05	2.48425e-05	3.10675e-06	7.47134e-05	0.0107198	0.0407671	0.0300195	0.0984315
	SA01 26	0.0308568	16.3152	3.59802	5.56845	5.77691	1.05591e-05	0.951119	0.22053	0.341303	0.354075	0.0582959	1.60556	1.07645e-05	1.22374e-05	2.61894e-05	3.93464e-06	6.81099e-05	-0.00717247	-0.0256359	0.000406168	-0.0558816
	SA01 27	0.0309212	16.2909	3.59266	5.56028	5.76825	-1.15418e-05	0.949742	0.220531	0.341309	0.354074	0.0582985	1.60555	8.0055e-06	1.20006e-05	2.10194e-05	3.82124e-06	7.4079e-05	-0.0123199	0.000471754	-0.0187351	-0.0147643
	SA01 28	0.030832	16.2186	3.5768	5.53569	5.74283	-3.83621e-07	0.945588	0.220537	0.341316	0.354085	0.0583028	1.60556	9.3374e-06	1.08715e-05	2.05333e-05	4.08046e-06	6.99081e-05	0.0204427	0.0217503	0.0241398	0.0963295
	SA01 29	0.0311036	16.3326	3.60188	5.57443	5.78309	6.37339e-06	0.952126	0.220533	0.341307	0.35408	0.0582958	1.60556	7.82033e-06	1.10221e-05	1.99356e-05	3.64139e-06	6.87912e-05	-0.00326484	-0.0405067	-0.0346599	-0.109987
	SA01 30	0.0307314	16.1195	3.55489	5.50204	5.70798	1.34458e-05	0.939798	0.220532	0.341326	0.354099	0.0583017	1.60566	8.21989e-06	1.07563e-05	2.13542e-05	4.12319e-06	6.6898e-05	-0.00218852	0.042323	0.0388155	0.0772673
	SA01 31	0.030668	16.0442	3.53826	5.47618	5.68116	1.00775e-05	0.935361	0.220531	0.341317	0.35409	0.0582986	1.60562	9.04658e-06	1.16768e-05	2.24354e-05	3.8515e-06	7.81839e-05	-0.0202715	-0.00978861	0.000434691	-0.0187988
	SA01 32	0.0310065	16.1892	3.57036	5.5256	5.73233	-7.34868e-06	0.943789	0.220539	0.341314	0.354081	0.0582976	1.60552	9.35205e-06	1.25637e-05	2.25684e-05	3.49149e-06	7.2424e-05	0.00821471	-0.0460277	-0.078115	-0.115285
	SA01 33	0.028596	14.8968	3.28542	5.08495	5.27545	7.29104e-06	0.868637	0.220544	0.341342	0.354128	0.0583102	1.6057	8.69246e-06	1.21543e-05	2.25831e-05	4.2121e-06	7.90837e-05	0.0101696	0.0456643	0.0371191	0.118203
	SA01 34	0.0286466	14.8981	3.28571	5.08534	5.2762	-2.37881e-06	0.868699	0.220544	0.341339	0.354148	0.0583089	1.60579	9.37853e-06	1.29276e-05	2.38578e-05	3.97328e-06	7.38708e-05	-0.00727976	0.00178486	0.0551827	0.00641737
	SA01 35	0.0287977	15.0478	3.31877	5.13636	5.32891	-6.58524e-06	0.877396	0.220547	0.341335	0.354129	0.0583069	1.60568	9.58006e-06	1.09301e-05	2.30335e-05	3.6414e-06	6.4912e-05
5 (2021-01-20)	SA01 01	0.0262161	13.4917	2.97594	4.60661	4.7806	-1.35974e-05	0.787381	0.220575	0.341439	0.354334	0.0583605	1.60641	1.00254e-05	1.33559e-05	2.37987e-05	4.43467e-06	8.09347e-05
	SA01 02	0.0271103	13.9671	3.08084	4.76908	4.94895	4.30416e-06	0.81508	0.220578	0.341448	0.354326	0.0583573	1.60636	9.54397e-06	1.45571e-05	2.66484e-05	5.18708e-06	8.49852e-05	-0.00790272	0.00759186	-0.0531281	-0.0561912
	SA01 03	0.0266746	13.7346	3.02963	4.68971	4.86696	-3.68635e-06	0.801556	0.220584	0.341452	0.354356	0.0583607	1.60644	9.41547e-06	1.15574e-05	2.03729e-05	3.7287e-06	7.57191e-05	0.0325309	0.0120036	0.0724096	0.0408253
	SA01 04	0.027263	14.0061	3.08942	4.78236	4.9629	1.28971e-06	0.817391	0.220576	0.341448	0.354335	0.0583592	1.60641	7.86692e-06	1.14353e-05	2.10039e-05	4.49052e-06	7.44181e-05	-0.000759004	0.00025424	-0.0355061	-0.0262812
	SA01 05	0.0277956	14.2655	3.14654	4.87087	5.05488	9.48442e-07	0.832543	0.220569	0.341444	0.354339	0.0583609	1.60648	8.81652e-06	1.14547e-05	2.18849e-05	3.43453e-06	6.77658e-05	-0.054279	-0.0268335	-0.01101	-0.0607492
	SA01 06	0.0276357	14.137	3.11841	4.82719	5.00949	-1.00282e-05	0.825164	0.220586	0.341458	0.354351	0.0583696	1.60641	1.09883e-05	1.23939e-05	2.12403e-05	4.24722e-06	7.45414e-05	0.0531088	0.0289835	0.00929635	0.108127
	SA01 07	0.0277381	14.1638	3.12424	4.83627	5.0191	7.66032e-06	0.826689	0.220579	0.341452	0.354356	0.0583658	1.60649	1.03976e-05	1.32556e-05	2.68115e-05	4.55707e-06	7.56296e-05	-0.0160952	-0.0146937	0.0128342	-0.000949254
	SA01 08	0.0275666	14.045	3.09805	4.79577	4.97696	-9.87982e-06	0.819701	0.220579	0.341456	0.354352	0.058362	1.60647	9.55473e-06	1.18075e-05	2.40159e-05	4.45142e-06	7.56693e-05	-0.0037587	0.026046	-0.00931236	-0.075838
	SA01 09	0.0275495	13.9953	3.0871	4.7786	4.95935	7.44492e-06	0.816873	0.220581	0.341442	0.354355	0.0583671	1.60647	9.62231e-06	1.1413e-05	2.29568e-05	5.23992e-06	7.18453e-05	0.00566654	-0.0170268	0.0226054	0.137762
	SA01 10	0.0277055	14.2248	3.13773	4.85694	5.04051	-2.75854e-07	0.830111	0.22058	0.34144	0.354342	0.0583561	1.60641	1.01413e-05	1.15052e-05	2.36668e-05	3.99112e-06	6.5409e-05	0.00077637	-0.0185022	-0.0443235	-0.145915
	SA01 11	0.0277234	14.1893	3.12987	4.84497	5.02819	-5.8015e-06	0.828127	0.220579	0.341451	0.35436	0.0583621	1.6065	1.06808e-05	1.45949e-05	2.6712e-05	4.38008e-06	7.237e-05	-0.00672873	0.0195879	0.0322661	0.100642
	SA01 12	0.0277557	14.1793	3.12769	4.84152	5.02456	-1.4557e-06	0.827462	0.220581	0.341448	0.354355	0.0583564	1.60646	1.02471e-05	1.28023e-05	2.21873e-05	3.78827e-06	6.50747e-05	0.00213653	-0.0142428	-0.0213611	-0.111748
	SA01 13	0.0268094	13.6748	3.01643	4.66937	4.84595	3.21264e-06	0.798117	0.220582	0.341455	0.354366	0.0583638	1.6065	8.55846e-06	1.04369e-05	2.11659e-05	4.28361e-06	7.02873e-05	0.00980393	0.0367939	0.0471953	0.108036
	SA01 14	0.0280645	14.2944	3.15305	4.88067	5.06519	1.11018e-05	0.834204	0.220579	0.341437	0.354343	0.0583585	1.60642	1.01767e-05	1.43122e-05	2.66389e-05	4.26381e-06	8.49485e-05	-0.00411743	-0.0398105	-0.0362501	-0.0326003
	SA01 15	0.0267157	13.7325	3.02908	4.68894	4.86612	-1.09854e-05	0.801395	0.220577	0.341446	0.354346	0.058357	1.60645	9.73205e-06	1.59734e-05	2.78341e-05	5.15934e-06	8.60027e-05	-0.00869782	0.00939321	-0.0192832	-0.0601926
	SA01 16	0.0270786	13.8501	3.05507	4.72913	4.908	4.21723e-06	0.808331	0.22058	0.341449	0.354362	0.0583626	1.6065	9.06432e-06	1.08813e-05	2.18774e-05	3.49653e-06	7.64115e-05	-0.000453704	-0.00316808	-0.00948071	0.0320847
	SA01 17	0.0286951	14.6161	3.22406	4.99074	5.1798	-2.22392e-07	0.853074	0.220582	0.341454	0.354385	0.0583644	1.60659	9.88189e-06	1.3921e-05	2.95432e-05	5.65666e-06	9.31408e-05	0.0211837	0.00406448	0.0699368	0.0232786
	SA01 18	0.0269193	13.7236	3.02708	4.686	4.86311	7.2824e-07	0.80096	0.220575	0.341456	0.354358	0.0583635	1.60652	9.86762e-06	1.32664e-05	2.59651e-05	4.30951e-06	7.98551e-05	-0.0328732	-0.00614046	-0.0567492	-0.037039
	SA01 19	0.0272972	13.8831	3.06238	4.74057	4.91983	9.79625e-06	0.810318	0.220583	0.341462	0.354372	0.0583669	1.60652	9.70378e-06	1.15202e-05	1.99182e-05	4.16792e-06	6.75693e-05	0.0325469	0.00730392	0.0360051	0.0413872
	SA01 20	0.027402	14.04	3.09692	4.79419	4.97531	1.14845e-05	0.819465	0.220576	0.341463	0.35436	0.0583655	1.60652	1.03157e-05	1.31801e-05	2.60583e-05	4.50836e-06	7.21833e-05	-0.0324137	0.00773191	-0.00644771	0.0581226
	SA01 21	0.0270039	13.8251	3.04963	4.72074	4.89905	3.52081e-06	0.806803	0.220584	0.341459	0.354353	0.0583573	1.60643	1.04985e-05	1.25079e-05	2.5079e-05	4.12205e-06	7.41779e-05	0.0205797	0.00913325	-0.0223972	-0.121242
	SA01 22	0.0271374	13.8581	3.05687	4.73187	4.91086	4.39866e-06	0.808814	0.220583	0.341449	0.354362	0.0583633	1.60648	8.56694e-06	1.31119e-05	2.53209e-05	4.40647e-06	8.98966e-05	-0.00913974	-0.0346273	0.0255964	0.0514028
	SA01 23	0.0272102	13.8652	3.05848	4.73448	4.91324	-1.00411e-05	0.809227	0.220585	0.341462	0.354352	0.0583632	1.60642	1.01438e-05	1.34266e-05	2.52545e-05	4.95482e-06	6.98588e-05	0.0132944	0.0221237	-0.0315518	-0.0185032
	SA01 24	0.0269842	13.7183	3.02603	4.68427	4.86137	-3.08247e-06	0.800677	0.220582	0.34146	0.354365	0.0583654	1.6065	9.96748e-06	1.1665e-05	2.60289e-05	3.99776e-06	8.3917e-05	-0.0177944	0.000726516	0.0307095	0.0230318
	SA01 25	0.0267614	13.7404	3.03094	4.69178	4.86905	9.19329e-06	0.801957	0.220587	0.341458	0.354356	0.0583648	1.60643	1.06423e-05	1.29379e-05	2.51446e-05	4.51711e-06	8.01988e-05	0.0256747	0.0210278	0.00958408	0.0118969
	SA01 26	0.0270245	13.8421	3.05329	4.72627	4.90487	-1.1608e-05	0.80786	0.22058	0.341442	0.35434	0.0583628	1.6064	9.3191e-06	1.36663e-05	2.6415e-05	4.97742e-06	7.61045e-05	-0.0222172	-0.0464881	-0.067589	-0.0499048
	SA01 27	0.0267056	13.651	3.01118	4.66126	4.83759	1.02379e-05	0.796764	0.220583	0.341457	0.354373	0.0583667	1.60653	8.80884e-06	1.15398e-05	2.0133e-05	3.85435e-06	7.08718e-05	0.0207154	0.0233592	0.0594434	0.0603945
	SA01 28	0.0267942	13.6669	3.01461	4.66666	4.84309	6.72929e-06	0.797652	0.220577	0.341456	0.354363	0.0583635	1.60653	8.8962e-06	1.18028e-05	2.25888e-05	3.60707e-06	7.58074e-05	-0.036685	-0.0247252	-0.046929	-0.0721885
	SA01 29	0.027279	13.8642	3.05828	4.73425	4.91332	5.42395e-06	0.809236	0.220587	0.341472	0.354386	0.0583688	1.60656	9.80592e-06	1.23542e-05	2.13385e-05	4.15083e-06	6.44684e-05	0.0413279	0.0620257	0.0743261	0.0671338
	SA01 30	0.0268318	13.629	3.00629	4.65357	4.82959	-5.84114e-06	0.795476	0.220579	0.341446	0.354357	0.0583662	1.60649	1.09259e-05	1.32596e-05	2.65465e-05	4.40462e-06	6.99109e-05	-0.0299594	-0.0592813	-0.0400587	-0.00948641
	SA01 31	0.0269092	13.6342	3.00751	4.65555	4.83144	-2.36463e-06	0.795769	0.220584	0.34146	0.354356	0.0583647	1.60644	8.52588e-06	1.19124e-05	2.45526e-05	4.34067e-06	7.78075e-05	0.000142623	0.00326575	-0.0490483	-0.0284966
	SA01 32	0.0271626	13.7826	3.0403	4.70638	4.88446	-6.09644e-06	0.804448	0.220589	0.341472	0.35439	0.0583665	1.60656	8.82928e-06	1.22286e-05	2.42307e-05	3.90835e-06	7.80964e-05	0.0436931	0.0443362	0.0939002	-0.0111433
	SA01 33	0.0267525	13.6045	3.00082	4.64531	4.82089	5.50373e-06	0.794093	0.220575	0.341454	0.354357	0.0583697	1.60652	8.98743e-06	1.08883e-05	2.23417e-05	4.25723e-06	7.92074e-05	-0.0423249	-0.0230407	-0.0302223	0.0941579
	SA01 34	0.0267459	13.6068	3.00138	4.64608	4.82157	-7.67613e-06	0.794122	0.220579	0.341451	0.354346	0.0583618	1.60643	1.04549e-05	1.15337e-05	2.44274e-05	4.35157e-06	7.8682e-05	-0.00661484	-0.0171473	-0.0561449	-0.119051
	SA01 35	0.0271187	13.7662	3.03665	4.70063	4.87845	8.04279e-06	0.803512	0.220587	0.34146	0.354374	0.0583679	1.60651	9.67041e-06	1.14339e-05	2.34558e-05	3.95947e-06	7.32638e-05
6 (2021-01-20)	SA01 01	0.0269565	13.2303	2.91836	4.51755	4.68829	1.27629e-05	0.772184	0.220581	0.341455	0.354357	0.0583647	1.60647	9.60855e-06	1.31408e-05	2.22325e-05	4.40331e-06	6.95332e-05
	SA01 02	0.0274164	13.4277	2.96196	4.585	4.7584	-6.33741e-06	0.783754	0.220586	0.341458	0.354368	0.058368	1.60649	1.05603e-05	1.27329e-05	2.42607e-05	3.7654e-06	7.5545e-05	0.0145604	-0.0127994	0.0137477	0.049624
	SA01 03	0.0278502	13.5986	2.99965	4.64352	4.81901	-4.98415e-06	0.793699	0.220584	0.341469	0.354371	0.0583655	1.60651	8.96265e-06	1.21003e-05	2.3635e-05	4.41427e-06	8.27429e-05	-0.00297623	0.0242338	-0.0127072	-0.0199667
	SA01 04	0.0277643	13.5261	2.98364	4.61869	4.79346	-6.34323e-06	0.789465	0.220584	0.341463	0.354382	0.0583654	1.60656	1.0135e-05	1.30688e-05	2.65566e-05	3.87806e-06	9.34262e-05	-0.0108243	-0.0203495	0.0186984	-0.0362138
	SA01 05	0.0281293	13.7473	3.03251	4.69434	4.87183	1.06978e-06	0.802425	0.220588	0.341472	0.35438	0.0583694	1.60652	1.12994e-05	1.28647e-05	2.9301e-05	4.03361e-06	8.14356e-05	7.94611e-05	0.0159376	-0.00505634	0.00915304
	SA01 06	0.0284076	13.6033	3.00079	4.64513	4.82079	1.08541e-05	0.79406	0.220592	0.34147	0.354381	0.0583724	1.6065	9.65894e-06	1.22637e-05	2.30733e-05	4.21039e-06	7.23672e-05	0.0209037	0.00354427	-0.0164162	0.0267456
	SA01 07	0.0288301	13.7713	3.03779	4.70243	4.88052	4.40045e-07	0.803869	0.220588	0.341465	0.354394	0.0583723	1.60659	1.05484e-05	1.31599e-05	2.67571e-05	4.6692e-06	7.07177e-05	0.00239882	-0.0133339	0.0645494	0.0232396
	SA01 08	0.0265053	12.8589	2.83644	4.39092	4.55673	-7.92462e-06	0.750567	0.220582	0.341469	0.354361	0.0583694	1.60649	9.26987e-06	1.23874e-05	2.10394e-05	4.08299e-06	7.2061e-05	0.000234223	0.0263038	-0.0534257	0.0123151
	SA01 09	0.0273164	13.4598	2.96892	4.59594	4.76976	3.22596e-06	0.785587	0.220576	0.341456	0.354367	0.0583652	1.60655	9.92008e-06	1.24208e-05	2.18771e-05	3.85082e-06	7.42536e-05	-0.0183789	-0.0292632	0.0153853	-0.0237191
	SA01 10	0.0279702	13.535	2.98554	4.62172	4.79637	-6.35032e-06	0.789964	0.220578	0.341462	0.354361	0.0583636	1.60651	7.79483e-06	1.22148e-05	2.23292e-05	4.43312e-06	8.31355e-05	-0.017314	0.0155191	-0.0185997	-0.0559551
	SA01 11	0.0270965	12.9047	2.84663	4.40645	4.57308	4.65239e-06	0.753238	0.220588	0.341458	0.354368	0.0583687	1.60647	9.21844e-06	1.27085e-05	2.42247e-05	4.88023e-06	7.77035e-05	0.0391944	-0.00127051	0.0107723	0.0612223
	SA01 12	0.0286772	13.6258	3.00558	4.6526	4.8286	7.49856e-06	0.795295	0.22058	0.341454	0.354368	0.0583665	1.60653	9.68486e-06	1.21182e-05	2.37014e-05	3.95401e-06	8.45624e-05	-0.0296253	-0.0230351	-0.0245392	-0.0225355
	SA01 13	0.027012	13.3061	2.93514	4.5436	4.71553	-4.32842e-06	0.776636	0.220586	0.341467	0.354386	0.058367	1.60657	1.0381e-05	1.35343e-05	2.48513e-05	3.72939e-06	8.5904e-05	0.023085	0.0214982	0.0213458	-0.034026
	SA01 14	0.0271859	13.3864	2.9528	4.57101	4.74404	4.34508e-06	0.781386	0.220581	0.341464	0.354388	0.0583715	1.60661	9.8516e-06	1.40875e-05	2.49974e-05	5.01359e-06	7.192e-05	-0.0152398	-0.0127606	0.0124846	0.10819
	SA01 15	0.0283656	13.665	3.01429	4.66624	4.8427	9.93667e-06	0.797542	0.220583	0.341471	0.354381	0.0583634	1.60656	9.71636e-06	1.36144e-05	2.37749e-05	4.17236e-06	7.26967e-05	0.0136327	0.016675	-0.00497106	-0.0861247
	SA01 16	0.0288732	13.7424	3.03128	4.69257	4.87004	3.76128e-06	0.802082	0.220579	0.341466	0.354378	0.0583653	1.60658	9.20628e-06	1.17447e-05	1.99567e-05	3.38003e-06	7.38978e-05	-0.0338196	-0.00565872	-0.0310855	-0.0099168
	SA01 17	0.0287791	13.6751	3.0166	4.66958	4.84645	-1.28277e-05	0.798197	0.22059	0.341465	0.354397	0.0583683	1.60658	1.01655e-05	1.33638e-05	2.36651e-05	4.08133e-06	6.72217e-05	0.0375975	-0.0124226	0.047307	0.01069
	SA01 18	0.0278477	13.7446	3.03184	4.69339	4.87087	-2.05084e-06	0.80228	0.220584	0.341472	0.354382	0.0583701	1.60656	9.83292e-06	1.32151e-05	2.2344e-05	4.93891e-06	7.59371e-05	-0.0253775	0.00515377	-0.0254093	0.0084978
	SA01 19	0.0279637	13.7751	3.03867	4.70389	4.88176	6.67626e-07	0.804072	0.22059	0.341476	0.354385	0.0583709	1.60653	8.7782e-06	1.02107e-05	2.31535e-05	4.17605e-06	8.12512e-05	0.0429676	0.0403333	0.0288116	0.0256817
	SA01 20	0.0288397	13.8811	3.06186	4.73978	4.9191	-6.52387e-07	0.810235	0.220577	0.341452	0.354368	0.0583688	1.60655	8.6595e-06	1.30663e-05	2.40424e-05	4.41407e-06	8.56916e-05	-0.0529545	-0.0429062	-0.0208854	-0.00980656
	SA01 21	0.02845	13.5704	2.99345	4.63374	4.80894	1.82056e-06	0.792081	0.220587	0.341458	0.354366	0.0583677	1.60647	1.03484e-05	1.40528e-05	2.62837e-05	4.67034e-06	7.3346e-05	0.0418876	-0.00903708	-0.0474783	-0.013898
	SA01 22	0.0289751	13.8019	3.0444	4.71294	4.89138	-4.1002e-06	0.805593	0.220578	0.34147	0.354397	0.0583683	1.60667	8.47713e-06	1.28274e-05	2.29339e-05	5.29361e-06	6.95276e-05	-0.0371576	0.0177399	0.0637007	0.0552588
	SA01 23	0.0294303	14.5492	3.20936	4.96814	5.15608	3.95609e-06	0.849137	0.220586	0.341469	0.354383	0.0583624	1.60655	9.42903e-06	1.34518e-05	2.47927e-05	4.13353e-06	8.11488e-05	0.0259341	-0.000816882	-0.0331624	-0.112708
	SA01 24	0.0286803	14.1529	3.12191	4.83283	5.01577	1.86063e-06	0.826112	0.220583	0.34147	0.354393	0.0583697	1.60662	1.02503e-05	1.21431e-05	2.58599e-05	4.04097e-06	7.65361e-05	-0.00583919	0.0164417	0.0263324	0.078885
	SA01 25	0.0280529	13.7792	3.03946	4.70504	4.88318	8.00822e-06	0.80427	0.220582	0.341459	0.354384	0.0583678	1.60659	1.06616e-05	1.18923e-05	2.46021e-05	4.35201e-06	7.65583e-05	0.00184782	-0.0153425	0.00434698	0.00313871
	SA01 26	0.0282799	13.9064	3.06748	4.74847	4.92811	1.62558e-06	0.811664	0.22058	0.341458	0.354372	0.0583655	1.60655	9.9863e-06	1.3016e-05	2.67205e-05	4.73177e-06	8.14292e-05	-0.0166133	-0.013525	-0.0399094	-0.054471
	SA01 27	0.0290522	14.1339	3.11775	4.82629	5.00897	-1.05365e-05	0.824997	0.220585	0.341467	0.354388	0.0583696	1.60658	8.49928e-06	1.15043e-05	2.40047e-05	4.40165e-06	8.20662e-05	0.00904714	0.00470793	0.0252587	0.0245119
	SA01 28	0.0287534	13.7886	3.04159	4.70846	4.88658	-1.10047e-05	0.804863	0.220587	0.341472	0.354386	0.0583708	1.60656	1.17988e-05	1.61979e-05	2.73968e-05	5.03186e-06	8.83796e-05	0.00676582	0.00446118	-0.0185609	0.0191499
	SA01 29	0.0279331	13.6739	3.01628	4.66931	4.84607	-1.02951e-05	0.798149	0.220586	0.341475	0.354398	0.0583698	1.60662	1.03947e-05	1.14209e-05	2.45567e-05	4.44464e-06	7.75736e-05	-0.0169922	0.0167473	0.0343304	-0.0342735
	SA01 30	0.0276156	13.657	3.01263	4.66342	4.83989	-1.80382e-06	0.797204	0.220592	0.341466	0.354385	0.0583728	1.60652	1.05832e-05	1.28641e-05	2.40523e-05	3.81922e-06	7.37216e-05	0.0325018	-0.0186966	-0.0246818	0.067567
	SA01 31	0.0273903	13.547	2.98826	4.62592	4.80098	-1.25407e-06	0.790719	0.220583	0.341469	0.35439	0.0583679	1.6066	9.21252e-06	1.15406e-05	2.23386e-05	4.06629e-06	7.76901e-05	0.00416518	0.00380808	0.0201225	-0.061333
	SA01 32	0.0263175	12.9854	2.86423	4.43414	4.6018	9.03922e-06	0.757957	0.220573	0.341471	0.35438	0.0583701	1.60663	7.72467e-06	1.11293e-05	1.83268e-05	4.23561e-06	7.07203e-05	-0.0610649	0.00266385	-0.0158919	0.0594496
	SA01 33	0.0284528	14.006	3.08961	4.78266	4.96356	1.90114e-05	0.817474	0.22059	0.34147	0.354382	0.0583655	1.60652	9.78769e-06	1.1706e-05	2.29071e-05	4.03381e-06	8.35114e-05	0.0484827	-0.00593585	-0.0111642	-0.100011
	SA01 34	0.027338	13.4354	2.96367	4.58784	4.76146	1.0029e-06	0.784268	0.220586	0.341473	0.354391	0.0583724	1.60659	1.09772e-05	1.25235e-05	2.63284e-05	4.36791e-06	8.30981e-05	-0.00411412	0.0232684	0.029227	0.0898749
	SA01 35	0.0273271	13.4568	2.96834	4.595	4.76888	7.85401e-06	0.785467	0.220583	0.341461	0.35438	0.0583689	1.60656	1.07928e-05	1.43168e-05	2.33883e-05	4.14937e-06	9.4345e-05
7 (2021-01-20)	SA01 01	0.0506611	25.8661	5.69962	8.81439	9.12859	-8.72728e-07	1.50044	0.22035	0.34077	0.352915	0.0580083	1.60161	6.81701e-06	8.41085e-06	1.59939e-05	2.84633e-06	5.4156e-05
	SA01 02	0.0504371	25.7648	5.67733	8.77978	9.09277	1.31109e-05	1.49472	0.220352	0.340767	0.352912	0.0580143	1.60158	6.07779e-06	8.42475e-06	1.6828e-05	3.24056e-06	5.99192e-05	0.00212319	0.00014095	-0.00349188	0.0840741
	SA01 03	0.0500453	25.5611	5.63247	8.71032	9.02086	1.17124e-05	1.48281	0.220352	0.340764	0.35291	0.0580105	1.60157	7.48784e-06	9.37778e-06	1.87312e-05	3.23107e-06	5.32102e-05	-0.00162385	-0.00500184	0.0014623	-0.0353373
	SA01 04	0.0514739	26.2235	5.77846	8.9361	9.25463	1.86702e-05	1.52125	0.220354	0.340765	0.352908	0.0580109	1.60155	6.06673e-06	9.59547e-06	1.97465e-05	3.44193e-06	6.62726e-05	-0.00754997	-0.0204672	-0.0483364	-0.032609
	SA01 05	0.0510565	25.9952	5.72827	8.85863	9.17483	4.23081e-06	1.50812	0.220358	0.34078	0.35294	0.058015	1.60167	7.13319e-06	8.99118e-06	1.85053e-05	2.94413e-06	5.89055e-05	0.0115779	0.0289406	0.0630368	0.062898
	SA01 06	0.0508008	25.8322	5.69233	8.80299	9.117	-5.61403e-06	1.49858	0.220358	0.340775	0.352928	0.0580119	1.60161	6.09036e-06	8.58456e-06	1.57862e-05	3.4342e-06	5.98825e-05	0.00306764	0.00383791	-0.0146182	-0.0121775
	SA01 07	0.0516968	26.2293	5.7798	8.93808	9.25709	1.76256e-05	1.52156	0.220356	0.340767	0.352926	0.0580101	1.60162	5.98326e-06	8.77232e-06	1.6521e-05	2.68954e-06	5.77513e-05	0.00396996	-0.0152316	0.00960346	-0.0309069
	SA01 08	0.0503267	25.4953	5.61794	8.68805	8.99778	2.92927e-05	1.47904	0.220352	0.34077	0.352917	0.058012	1.6016	5.78121e-06	8.41016e-06	1.57891e-05	3.126e-06	5.73569e-05	-0.0224579	-0.01494	-0.0533845	-0.02258
	SA01 09	0.0525437	26.5539	5.85139	9.04913	9.37217	7.9412e-06	1.54056	0.220358	0.340782	0.352946	0.0580164	1.60169	6.58709e-06	8.39688e-06	1.75625e-05	3.20522e-06	5.7403e-05	0.0236557	0.041064	0.0726415	0.0936191
	SA01 10	0.0511817	26.0798	5.74681	8.88717	9.20427	1.7236e-05	1.51289	0.220354	0.340767	0.352923	0.05801	1.60162	7.05347e-06	8.67546e-06	1.8903e-05	2.9188e-06	6.2324e-05	-0.00226676	-0.0210223	-0.019262	-0.0670087
	SA01 11	0.0509569	25.9369	5.71526	8.83846	9.15361	6.28045e-06	1.50464	0.220351	0.340766	0.352914	0.0580114	1.6016	7.78853e-06	9.12276e-06	1.72969e-05	3.13498e-06	4.95312e-05	-0.010869	-0.0023178	-0.0084053	0.0079747
	SA01 12	0.050599	25.7001	5.6631	8.75778	9.06994	6.20028e-06	1.49092	0.220353	0.340767	0.352911	0.0580118	1.60158	7.64112e-06	9.32725e-06	1.71261e-05	3.03511e-06	5.47394e-05	-0.00160201	-0.0240527	-0.0259559	-0.0166015
	SA01 13	0.0489433	24.8009	5.46503	8.4518	8.75299	7.03642e-06	1.43881	0.220355	0.340784	0.352927	0.0580142	1.60163	7.11491e-06	8.66567e-06	1.63432e-05	2.85974e-06	5.03873e-05	-0.00581386	0.0395467	0.0321329	0.043399
	SA01 14	0.0514919	26.0381	5.73777	8.87316	9.18942	2.77696e-06	1.51052	0.22036	0.340774	0.352919	0.0580115	1.60156	6.33153e-06	8.06406e-06	1.67123e-05	3.07562e-06	5.09186e-05	0.0372156	-0.00371261	0.000279717	0.00254956
	SA01 15	0.0515361	26.2624	5.78689	8.94938	9.26837	1.48059e-05	1.52344	0.220348	0.340767	0.352912	0.0580086	1.60161	6.72697e-06	9.43579e-06	1.73424e-05	3.04443e-06	5.88894e-05	-0.0503718	0.000618021	-0.0102802	-0.041355
	SA01 16	0.0517476	26.2861	5.79237	8.95725	9.27675	1.59912e-05	1.52486	0.220359	0.340759	0.352911	0.0580104	1.60153	7.34481e-06	8.39675e-06	1.68079e-05	3.03384e-06	6.73613e-05	0.0509511	-0.00745633	0.0189813	0.0451841
	SA01 17	0.0528444	26.6345	5.86887	9.07591	9.39936	1.08275e-05	1.54499	0.220347	0.340757	0.352898	0.058007	1.60155	6.73461e-06	7.77413e-06	1.62625e-05	3.19687e-06	6.00759e-05	-0.0323947	0.00190913	-0.0108166	-0.0465545
	SA01 18	0.0511029	25.7479	5.67356	8.77368	9.08627	1.74109e-05	1.49361	0.22035	0.340753	0.352892	0.058009	1.60151	6.74568e-06	8.70309e-06	1.52654e-05	3.46882e-06	5.10051e-05	-0.00382493	-0.0130331	-0.0371634	0.0115256
	SA01 19	0.0513856	26.0205	5.73371	8.86671	9.18302	-2.96915e-07	1.50945	0.220354	0.340758	0.352912	0.0580097	1.60157	5.56109e-06	8.59207e-06	1.7369e-05	3.0328e-06	6.1146e-05	0.0222217	-0.00257437	0.0284811	-0.0150111
	SA01 20	0.051467	26.152	5.76256	8.91169	9.22943	2.91776e-06	1.51713	0.220348	0.340765	0.352912	0.0580121	1.60161	5.56506e-06	8.07595e-06	1.42572e-05	3.0786e-06	4.92982e-05	-0.0251984	0.00240069	-0.0184332	0.0224927
	SA01 21	0.051717	26.2632	5.7872	8.94973	9.26901	1.58039e-05	1.52358	0.220354	0.34077	0.352925	0.0580118	1.60163	6.79558e-06	8.70915e-06	1.62382e-05	3.0493e-06	5.75757e-05	0.00680053	0.0105588	0.0219715	0.010098
	SA01 22	0.052894	26.8318	5.91258	9.14343	9.46965	1.70825e-05	1.55653	0.220356	0.340768	0.352923	0.0580105	1.6016	7.60871e-06	9.74766e-06	1.7962e-05	2.54539e-06	6.01126e-05	0.0128345	0.0119608	0.0239459	-0.0124864
	SA01 23	0.0516896	26.1978	5.77277	8.92711	9.24537	1.92926e-05	1.51975	0.220353	0.340757	0.352903	0.0580105	1.60154	6.19302e-06	9.52234e-06	1.66046e-05	3.23839e-06	5.76908e-05	0.00318695	-0.0271784	-0.0309176	0.0305996
	SA01 24	0.0513008	25.9748	5.72352	8.85133	9.16675	8.15562e-06	1.50671	0.220348	0.340766	0.352906	0.0580071	1.60158	7.39512e-06	8.49323e-06	1.75899e-05	3.09496e-06	5.69439e-05	-0.0180148	0.00309882	-0.0237415	-0.0790018
	SA01 25	0.0509295	25.9722	5.72303	8.85062	9.16635	2.09279e-05	1.50672	0.220352	0.340772	0.352925	0.0580127	1.60164	6.85669e-06	9.38238e-06	2.0129e-05	3.33797e-06	6.14018e-05	0.00862463	0.0102987	0.0266269	0.0446363
	SA01 26	0.0503554	25.6196	5.64533	8.73044	9.04192	-2.41954e-06	1.48629	0.220351	0.340771	0.352926	0.0580132	1.60165	6.6673e-06	9.00853e-06	1.64007e-05	3.18204e-06	5.64222e-05	-0.00635791	0.00538971	0.0183142	0.0422687
	SA01 27	0.0514869	26.1889	5.77085	8.92431	9.24246	-6.16979e-06	1.51919	0.220354	0.340766	0.352913	0.0580088	1.60158	7.87594e-06	9.16826e-06	1.60143e-05	3.54438e-06	4.81894e-05	0.0101418	-0.00187706	-0.0226213	-0.0402058
	SA01 28	0.0513146	26.0602	5.74241	8.88034	9.19711	1.41489e-05	1.51173	0.220352	0.340763	0.352917	0.0580091	1.60161	5.98695e-06	7.68702e-06	1.38534e-05	2.80537e-06	5.02253e-05	-0.0134497	-0.00686664	0.00616152	-0.00245281
	SA01 29	0.0479457	24.2784	5.34987	8.27319	8.56823	1.06871e-05	1.40838	0.220355	0.340764	0.352916	0.0580097	1.60158	5.61099e-06	8.07093e-06	1.21789e-05	2.48048e-06	5.01484e-05	0.00813174	0.0174089	0.0189198	0.0396895
	SA01 30	0.0520543	26.3553	5.80754	8.98065	9.30084	5.50404e-06	1.52875	0.220356	0.340754	0.352902	0.0580056	1.60151	6.06254e-06	7.57475e-06	1.44475e-05	3.31134e-06	4.95367e-05	0.01016	-0.025797	-0.0130395	-0.0253284
	SA01 31	0.0516579	26.119	5.75536	8.90034	9.21734	-9.84707e-06	1.51501	0.220351	0.340761	0.352897	0.0580045	1.60152	6.5127e-06	9.72006e-06	1.72211e-05	3.16368e-06	5.14676e-05	0.00258833	0.0185753	0.0102049	0.00389267
	SA01 32	0.051293	25.9761	5.72374	8.85152	9.16662	-1.82298e-06	1.50669	0.220346	0.340756	0.352884	0.0580029	1.6015	6.87746e-06	9.25714e-06	1.54947e-05	2.9599e-06	4.71364e-05	-0.00713237	0.00516899	-0.00815566	0.0230108
	SA01 33	0.0518955	25.955	5.71903	8.84409	9.15901	-1.02751e-05	1.50536	0.220344	0.340747	0.352878	0.0579987	1.60149	6.45956e-06	8.02577e-06	1.60854e-05	2.95694e-06	5.17777e-05	-0.0138092	-0.0303904	-0.0243545	-0.0885201
	SA01 34	0.0502992	25.4908	5.61684	8.6862	8.99549	4.20419e-06	1.47858	0.220348	0.340758	0.352889	0.0580047	1.60151	6.1707e-06	8.86945e-06	1.83528e-05	3.56934e-06	5.76941e-05	0.00301215	0.0274349	0.0297465	0.0753932
	SA01 35	0.0507246	25.7324	5.67015	8.76834	9.08045	-2.35972e-06	1.49253	0.22035	0.340751	0.352878	0.058002	1.60144	6.71957e-06	8.3041e-06	1.67929e-05	2.96892e-06	6.29133e-05
8 (2021-01-20)	SA01 01	0.0497882	25.2562	5.56512	8.60633	8.91286	1.13657e-06	1.46508	0.220347	0.340762	0.352898	0.0580095	1.60156	7.42996e-06	1.02814e-05	1.87352e-05	3.65843e-06	6.26377e-05
	SA01 02	0.0507698	25.8111	5.68761	8.79551	9.10925	-2.64798e-06	1.49727	0.220355	0.340765	0.352919	0.0580091	1.60159	6.65888e-06	9.66225e-06	1.56277e-05	2.6783e-06	5.11174e-05	0.0266068	0.00384941	0.0476868	0.0134359
	SA01 03	0.0508797	25.9291	5.71353	8.83574	9.15059	1.88923e-05	1.50407	0.220351	0.340766	0.352907	0.0580072	1.60156	7.59306e-06	9.10614e-06	1.78186e-05	3.07433e-06	5.52046e-05	-0.0224711	-0.00575258	-0.0450585	-0.0461768
	SA01 04	0.0508593	25.9386	5.71578	8.83909	9.15447	1.74512e-05	1.50471	0.220358	0.34077	0.352926	0.0580106	1.60161	7.61871e-06	1.07258e-05	1.75929e-05	2.62267e-06	5.41116e-05	0.0403037	0.0227027	0.0546595	0.0794982
	SA01 05	0.0513972	26.0251	5.73455	8.8683	9.18453	1.42232e-05	1.50959	0.220346	0.340759	0.352907	0.0580049	1.6016	6.32793e-06	8.38618e-06	1.51352e-05	2.71813e-06	5.21356e-05	-0.0300702	-0.0247053	-0.0336752	-0.0544683
	SA01 06	0.0519191	26.2051	5.77425	8.9298	9.24812	1.74371e-05	1.52003	0.220348	0.340765	0.352912	0.0580054	1.60161	6.27653e-06	7.90618e-06	1.56485e-05	3.14582e-06	5.31514e-05	-0.00362812	0.00796028	0.00751023	-0.0231671
	SA01 07	0.0507365	25.5716	5.63476	8.71394	9.02455	2.12954e-05	1.48337	0.220351	0.340765	0.352911	0.0580086	1.60158	6.12328e-06	8.35404e-06	1.43993e-05	3.47557e-06	4.78439e-05	-0.0118305	-0.020092	-0.0295946	-0.0253507
	SA01 08	0.0520132	26.1289	5.7578	8.90423	9.22176	8.8518e-06	1.51586	0.22036	0.34078	0.352931	0.0580148	1.60161	6.71642e-06	7.98262e-06	1.48404e-05	2.74364e-06	4.59334e-05	0.0295673	0.0319552	0.0378467	0.0885821
	SA01 09	0.0519997	26.059	5.74227	8.8802	9.19695	6.49465e-06	1.5117	0.220356	0.340772	0.352925	0.0580107	1.60161	6.40247e-06	8.11023e-06	1.65841e-05	3.13579e-06	5.74719e-05	0.00114866	0.00776141	0.0189922	0.00654544
	SA01 10	0.0518753	26.2947	5.79406	8.96016	9.27954	1.33318e-05	1.52524	0.220351	0.340759	0.352905	0.0580058	1.60156	6.98046e-06	8.40314e-06	1.64558e-05	3.22544e-06	5.01836e-05	-0.0162587	-0.0447904	-0.0562151	-0.0820755
	SA01 11	0.0514832	26.0609	5.74259	8.88092	9.19755	5.52963e-06	1.5118	0.220353	0.340776	0.352924	0.0580105	1.60163	6.99376e-06	8.63974e-06	1.67889e-05	3.42632e-06	4.92647e-05	-0.00233655	0.0419208	0.0332681	0.0486832
	SA01 12	0.0516904	26.1093	5.75338	8.89719	9.2146	-1.84257e-05	1.51458	0.220356	0.340765	0.352921	0.0580095	1.60159	7.40909e-06	9.02656e-06	1.83066e-05	2.43561e-06	5.58753e-05	0.0154359	-0.0164356	0.00515401	0.00122718
	SA01 13	0.0524492	26.4373	5.82556	9.00893	9.33017	-1.02022e-05	1.53359	0.220353	0.340766	0.352913	0.0580084	1.60158	6.05146e-06	8.64925e-06	1.69745e-05	3.48289e-06	5.57003e-05	-0.0091761	-0.00534692	-0.0279411	-0.0475018
	SA01 14	0.0524373	26.3317	5.80228	8.97306	9.29317	-2.02994e-07	1.52757	0.220353	0.34077	0.352926	0.0580127	1.60164	6.74405e-06	8.5802e-06	1.52194e-05	3.0556e-06	5.01069e-05	-0.00440741	0.00377163	0.0220348	0.0719776
	SA01 15	0.0508319	25.8353	5.69297	8.80391	9.11788	-1.2378e-05	1.49866	0.220356	0.340771	0.352923	0.0580088	1.6016	6.96545e-06	7.92698e-06	1.60333e-05	3.11994e-06	5.52285e-05	0.0134154	0.0102481	0.00857074	-0.037185
	SA01 16	0.0530767	26.8837	5.9239	9.16105	9.48768	1.08074e-05	1.5595	0.220352	0.340765	0.352913	0.0580091	1.60159	6.97022e-06	9.57401e-06	1.83064e-05	3.29726e-06	5.41039e-05	-0.0195932	-0.0266246	-0.0316195	-0.024126
	SA01 17	0.0506537	25.6091	5.64318	8.72702	9.03819	4.69956e-06	1.48564	0.220358	0.340778	0.352926	0.0580122	1.60161	6.49086e-06	8.01873e-06	1.70769e-05	3.4885e-06	5.23804e-05	0.0131294	0.00895659	-0.0134878	-0.00245266
	SA01 18	0.0534399	26.968	5.9426	9.19026	9.51838	1.09005e-05	1.56456	0.220357	0.340784	0.352949	0.0580157	1.60171	7.22635e-06	1.01171e-05	1.87429e-05	3.0944e-06	5.9052e-05	-0.000215705	0.0368531	0.0828655	0.0762802
	SA01 19	0.0523442	26.3737	5.81164	8.98725	9.30769	1.22876e-05	1.52995	0.220357	0.340765	0.352913	0.0580102	1.60155	6.86567e-06	9.39244e-06	1.5475e-05	2.76432e-06	5.69182e-05	-0.00242097	-0.0390849	-0.0681595	-0.062416
	SA01 20	0.0518353	26.3514	5.80673	8.97986	9.30014	5.60885e-07	1.5287	0.220357	0.340773	0.352925	0.058012	1.60161	6.33155e-06	8.73304e-06	1.90215e-05	3.25514e-06	6.24626e-05	0.0204002	0.0200119	0.0256965	0.036935
	SA01 21	0.051286	26.0549	5.74118	8.87866	9.19532	1.77324e-06	1.51143	0.220349	0.340767	0.35292	0.0580096	1.60164	7.93197e-06	1.00248e-05	1.8507e-05	3.37977e-06	5.16834e-05	-0.0281248	0.00505107	0.02152	0.011904
	SA01 22	0.0519605	26.3085	5.79717	8.96484	9.28429	-3.90824e-07	1.52604	0.220353	0.340758	0.352898	0.0580057	1.60152	7.04988e-06	7.99021e-06	1.6458e-05	3.02321e-06	5.1275e-05	0.00552621	-0.0353563	-0.068393	-0.0596534
	SA01 23	0.0515179	26.01	5.73141	8.8635	9.17961	3.45819e-07	1.5088	0.220354	0.340773	0.352926	0.0580088	1.60163	6.52971e-06	8.24444e-06	1.59486e-05	2.5319e-06	5.5136e-05	0.0208828	0.0387569	0.0455398	0.0179464
	SA01 24	0.0509155	25.7316	5.66989	8.76834	9.08125	1.80743e-05	1.49268	0.220347	0.340761	0.352921	0.0580098	1.60166	7.25327e-06	8.08059e-06	1.52318e-05	3.73408e-06	4.92378e-05	-0.0447379	-0.0348925	-0.0142102	-0.0178961
	SA01 25	0.0514579	25.9438	5.71694	8.84097	9.15631	-2.83477e-06	1.50508	0.220359	0.340773	0.352926	0.0580129	1.6016	7.63514e-06	9.95335e-06	1.84319e-05	3.28748e-06	5.72653e-05	0.0410448	0.0236487	0.00334959	0.0468
	SA01 26	0.0515376	25.9405	5.7161	8.83976	9.1552	6.6015e-06	1.50481	0.220353	0.34077	0.352928	0.0580105	1.60165	7.27201e-06	7.77669e-06	1.50728e-05	2.96762e-06	4.34983e-05	-0.0355732	-0.0366535	-0.0453224	-0.121795
	SA01 27	0.0510561	25.6003	5.64133	8.72433	9.03597	-3.91282e-06	1.48537	0.220362	0.340791	0.352963	0.0580223	1.60174	6.52031e-06	8.6126e-06	1.40397e-05	2.97649e-06	4.74204e-05	0.0422554	0.0511443	0.0834914	0.196359
	SA01 28	0.0529311	26.5163	5.84298	9.03617	9.35872	5.06996e-07	1.53825	0.220353	0.340777	0.352939	0.0580112	1.60169	7.46742e-06	1.08935e-05	2.1217e-05	3.54981e-06	6.52843e-05	-0.0241579	-0.00951487	-0.0270418	-0.0833469
	SA01 29	0.0528144	26.4108	5.81978	9.00004	9.32137	9.83765e-06	1.53209	0.220355	0.34077	0.352934	0.0580099	1.60166	6.53963e-06	8.81144e-06	1.84244e-05	3.41353e-06	5.9975e-05	0.00699097	-0.0192004	-0.00549937	-0.0353844
	SA01 30	0.0521741	26.0254	5.73481	8.86885	9.18532	1.49053e-05	1.50981	0.220354	0.340776	0.352932	0.0580127	1.60166	6.48424e-06	8.87001e-06	2.14171e-05	3.43477e-06	7.17468e-05	-0.00571042	0.00861394	-0.000176132	0.0460283
	SA01 31	0.0521437	26.0832	5.74758	8.88854	9.20565	2.3959e-06	1.51309	0.220355	0.340775	0.352931	0.0580101	1.60165	7.41544e-06	1.01643e-05	1.83131e-05	2.60326e-06	5.218e-05	0.00740775	0.0124856	0.00905023	0.00580076
	SA01 32	0.0515159	25.8661	5.69969	8.81434	9.12883	5.27656e-06	1.50042	0.220353	0.340767	0.352924	0.0580068	1.60163	7.19467e-06	8.96267e-06	1.81792e-05	3.42828e-06	5.481e-05	-0.01361	-0.0213425	-0.0258926	-0.0798528
	SA01 33	0.0523667	26.3532	5.80712	8.98046	9.30101	7.42588e-06	1.52882	0.220357	0.340773	0.352935	0.0580128	1.60165	5.29808e-06	7.33438e-06	1.47845e-05	2.96307e-06	5.80597e-05	0.016578	0.0235254	0.0552802	0.148939
	SA01 34	0.0509676	25.7334	5.67045	8.769	9.08152	-3.96726e-06	1.49257	0.220353	0.340763	0.352906	0.0580016	1.60155	7.0758e-06	8.32192e-06	1.6519e-05	3.20211e-06	4.77673e-05

## Sheet: SA02_LA
LA-MC-ICP-MS Zr isotopic data for SA02 zircon ( Mud Tank zircon used as Reference material)
Shard	Session	Sample	89Y	90Zr	91Zr	92Zr	94Zr	95Mo	96Zr	91/90	92/90	94/90	96/90	94/91	91/90(se)	92/90(se)	94/90(se)	96/90(se)	94/91(se)	δ91/90	δ92/90	δ94/90	δ96/90	δ94/90IPGP-Zr
Shard 1	1 (2021-03-26)	MudTank 01	0.195551	22.615	4.98619	7.71449	7.99851	1.76543e-05	1.31638	0.220482	0.341123	0.353681	0.0582082	1.60413	3.53973e-06	5.47079e-06	1.02158e-05	2.03612e-06	3.19085e-05
		SA02 01	0.149815	22.4726	4.95484	7.66624	7.94884	1.82037e-05	1.30826	0.220484	0.341137	0.353712	0.0582156	1.60426	3.74437e-06	6.32013e-06	1.21046e-05	2.08731e-06	4.16697e-05	-0.00457614	0.0313464	0.0565022	0.0736528	0.0865039
		MudTank 02	0.193116	22.4824	4.95709	7.66942	7.95208	3.61857e-05	1.3088	0.220488	0.34113	0.353703	0.0582145	1.60418	3.62196e-06	5.20296e-06	1.01639e-05	1.88802e-06	3.63187e-05
		SA02 02	0.154664	22.54	4.96993	7.68937	7.97299	2.6301e-05	1.31226	0.220494	0.341144	0.353727	0.0582193	1.60425	4.12829e-06	6.902e-06	1.33993e-05	2.68564e-06	4.28917e-05	0.0326109	0.0540548	0.0773549	0.126025	0.107357
		MudTank 03	0.18337	22.6855	5.00184	7.7385	8.02378	1.77352e-05	1.32051	0.220486	0.341121	0.353697	0.0582095	1.60417	4.15741e-06	5.92748e-06	1.22584e-05	2.25397e-06	3.99454e-05
		SA02 03	0.150129	22.6401	4.99187	7.72323	8.00814	4.42591e-07	1.31806	0.220488	0.34113	0.353715	0.0582178	1.60424	4.34732e-06	6.22395e-06	1.17532e-05	2.08435e-06	3.2902e-05	0.017411	0.00214984	0.0269937	0.0704353	0.0569945
		MudTank 04	0.180905	22.5519	4.97228	7.69331	7.97691	2.88786e-05	1.31292	0.220482	0.341138	0.353713	0.0582179	1.60428	4.35832e-06	5.48025e-06	1.22031e-05	2.32917e-06	3.56436e-05
		SA02 04	0.154574	22.5457	4.9711	7.69116	7.97498	1.48149e-05	1.31255	0.22049	0.341137	0.353725	0.0582175	1.60427	4.34807e-06	6.12748e-06	1.26324e-05	2.64555e-06	3.87465e-05	0.0204844	0.00913484	0.0467183	0.0309881	0.0767197
		MudTank 05	0.181391	22.6757	4.99975	7.73534	8.02049	1.59724e-05	1.32003	0.220489	0.341129	0.353704	0.0582134	1.60418	4.11093e-06	6.177e-06	1.20778e-05	2.62552e-06	3.72769e-05
		SA02 05	0.154313	22.5417	4.97017	7.68979	7.97315	2.67632e-05	1.31226	0.220488	0.341136	0.353706	0.058215	1.6042	4.02032e-06	5.9501e-06	1.19845e-05	2.37745e-06	4.16576e-05	0.00365481	0.0165202	-1.5566e-05	0.00891796	0.0299844
		MudTank 06	0.193058	22.6541	4.99488	7.72801	8.01293	1.65836e-05	1.31882	0.220485	0.341131	0.353708	0.0582155	1.60423	4.0007e-06	5.64679e-06	1.21674e-05	2.34443e-06	3.52025e-05
		SA02 06	0.125735	22.7949	5.02615	7.77616	8.06287	7.75215e-05	1.32714	0.220495	0.341137	0.353714	0.0582209	1.60419	3.24571e-06	4.58204e-06	9.33262e-06	1.69858e-06	3.2978e-05	0.0381854	0.0311121	0.0061569	0.104756	0.0361571
		MudTank 07	0.185446	22.741	5.01411	7.75743	8.04385	1.75741e-05	1.32385	0.220488	0.341121	0.353716	0.0582141	1.60424	3.38587e-06	5.43486e-06	1.09765e-05	2.25646e-06	3.8301e-05
		SA02 07	0.156687	22.5758	4.97762	7.70151	7.98537	1.63815e-05	1.31428	0.220484	0.34114	0.353713	0.0582165	1.60426	3.63838e-06	4.65072e-06	1.11749e-05	2.42778e-06	3.8312e-05	-0.012889	0.029812	-0.0117321	0.0572201	0.0182675
		MudTank 08	0.180675	22.5152	4.96431	7.68079	7.96405	2.64744e-05	1.31066	0.220487	0.341138	0.353719	0.0582122	1.60426	3.64701e-06	5.64568e-06	1.1892e-05	2.29439e-06	3.929e-05
		SA02 08	0.156118	22.6832	5.00146	7.73815	8.02335	4.18694e-06	1.32046	0.220492	0.34114	0.353713	0.0582131	1.6042	3.69398e-06	5.66278e-06	1.21247e-05	2.30643e-06	4.36262e-05	0.0156106	0.00887917	-0.0246382	-0.0661811	0.0053611
		MudTank 09	0.176747	22.473	4.95507	7.66637	7.94928	1.70513e-05	1.30842	0.22049	0.341136	0.353725	0.0582218	1.60427	4.14195e-06	6.12167e-06	1.21013e-05	2.24058e-06	3.99598e-05
		SA02 09	0.15421	22.5967	4.98237	7.70852	7.99295	2.05332e-05	1.31547	0.220491	0.341134	0.353721	0.0582153	1.60425	4.08649e-06	7.18515e-06	1.32006e-05	2.66658e-06	4.40912e-05	0.00739631	0.00111768	0.0293627	-0.0442724	0.0593636
		MudTank 10	0.19411	22.618	4.98701	7.7157	7.99992	1.14331e-05	1.31668	0.220489	0.341131	0.353697	0.0582139	1.60415	3.80889e-06	5.77358e-06	1.07205e-05	2.03666e-06	3.66619e-05
		SA02 10	0.154331	22.5908	4.98103	7.70642	7.99082	1.51973e-05	1.31516	0.220489	0.341131	0.35372	0.0582168	1.60425	4.11267e-06	7.39662e-06	1.2644e-05	2.73837e-06	4.14692e-05	0.00685311	-0.0123369	0.0308183	0.0188239	0.0608193
		MudTank 11	0.192623	22.4122	4.94159	7.64565	7.92765	5.69964e-06	1.30478	0.220487	0.341139	0.353721	0.0582174	1.60427	3.518e-06	5.40541e-06	1.19746e-05	2.53941e-06	4.19257e-05
		SA02 11	0.151939	22.709	5.0071	7.74697	8.03264	8.76169e-06	1.32201	0.22049	0.341141	0.353721	0.0582155	1.60425	3.85653e-06	5.94492e-06	1.16036e-05	2.15964e-06	3.75802e-05	0.025017	0.0242981	0.0283623	-0.00218938	0.0583632
		MudTank 12	0.194827	22.5352	4.96858	7.68737	7.97071	1.02476e-05	1.31186	0.220481	0.341128	0.353701	0.0582138	1.60422	3.02079e-06	5.88772e-06	9.56266e-06	2.16235e-06	3.39469e-05
		SA02 12	0.156193	22.8464	5.03729	7.79381	8.08124	2.47131e-05	1.33006	0.220485	0.34114	0.353721	0.0582176	1.60428	3.81589e-06	5.68946e-06	1.17717e-05	2.13782e-06	4.05833e-05	0.00358818	0.0328408	0.0637318	0.0731854	0.0937337
		MudTank 13	0.195658	22.5778	4.97811	7.70194	7.98566	1.40312e-05	1.31431	0.220487	0.341129	0.353696	0.0582128	1.60415	3.24869e-06	5.51249e-06	1.03943e-05	2.17192e-06	3.39141e-05
		SA02 13	0.153079	22.9841	5.06761	7.84066	8.13007	1.21892e-05	1.33812	0.220483	0.341134	0.353725	0.0582191	1.60432	3.9119e-06	4.83904e-06	1.01168e-05	1.89144e-06	3.12043e-05	-0.01781	0.0019079	0.0651781	0.0559627	0.09518
		MudTank 14	0.185139	22.4141	4.94201	7.64628	7.92806	2.67296e-05	1.30492	0.220487	0.341137	0.353709	0.0582189	1.60422	4.07842e-06	6.75118e-06	1.30238e-05	2.66055e-06	4.33875e-05
		SA02 14	0.155894	22.513	4.96394	7.68017	7.96334	2.40971e-05	1.31066	0.220492	0.341143	0.353721	0.0582179	1.60424	4.43168e-06	7.05897e-06	1.35735e-05	2.7178e-06	4.51729e-05	0.0234572	0.0169959	0.0132524	0.00967034	0.0432528
		MudTank 15	0.181294	22.5438	4.9706	7.69055	7.97429	2.89387e-05	1.3124	0.220486	0.341138	0.353724	0.0582157	1.60429	3.85943e-06	6.33092e-06	1.19443e-05	2.20716e-06	4.1876e-05
		SA02 15	0.151558	22.8313	5.03411	7.78856	8.07593	1.55511e-05	1.32925	0.220492	0.341136	0.353723	0.0582206	1.60425	4.05183e-06	5.97877e-06	1.16158e-05	2.54188e-06	4.07337e-05	0.032846	0.0161724	0.020857	0.12663	0.0508576
		MudTank 16	0.197826	22.8223	5.03192	7.78521	8.07242	1.53902e-05	1.3285	0.220483	0.341123	0.353707	0.0582108	1.60424	3.73139e-06	5.37092e-06	1.14906e-05	2.05926e-06	3.972e-05
		SA02 16	0.157552	22.8444	5.037	7.79335	8.08098	2.14113e-05	1.33004	0.220492	0.341149	0.35374	0.0582219	1.60432	3.62845e-06	5.72996e-06	1.19027e-05	2.30467e-06	3.88871e-05	0.0246121	0.0609512	0.091477	0.145377	0.12148
		MudTank 17	0.194877	22.609	4.98505	7.71267	7.99697	2.14781e-05	1.3162	0.22049	0.341133	0.353708	0.058216	1.60419	4.04274e-06	5.8332e-06	1.06108e-05	2.3848e-06	3.12263e-05
		SA02 17	0.151096	22.6298	4.98959	7.72003	8.00461	1.82907e-05	1.31745	0.220488	0.341145	0.35372	0.0582179	1.60426	4.65699e-06	5.49023e-06	9.97705e-06	1.91743e-06	3.06218e-05	0.0122448	0.0593648	0.053894	0.0501683	0.0838956
		MudTank 18	0.195596	22.6054	4.98404	7.71106	7.9954	1.18616e-05	1.31594	0.22048	0.341116	0.353695	0.0582139	1.6042	4.17605e-06	5.89812e-06	1.19897e-05	1.91196e-06	3.84569e-05
	2 (2021-03-26)	MudTank 01	0.171551	22.6452	4.99303	7.72514	8.01021	2.61837e-07	1.31838	0.220489	0.341138	0.353726	0.0582191	1.60428	4.01287e-06	5.38309e-06	1.07759e-05	1.9943e-06	3.62139e-05
		SA02 01	0.155415	22.9379	5.05751	7.82512	8.11367	1.29927e-05	1.33537	0.220486	0.341143	0.353723	0.0582165	1.60428	4.13384e-06	6.27069e-06	1.14225e-05	2.49468e-06	3.48006e-05	-0.0151145	0.0119843	-0.0253917	-0.0547736	0.00460751
		MudTank 02	0.172224	22.6604	4.99639	7.73035	8.01581	1.99577e-05	1.31929	0.22049	0.34114	0.353737	0.0582203	1.60432	3.83615e-06	4.97323e-06	1.07697e-05	2.17044e-06	3.36512e-05
		SA02 02	0.15589	22.8049	5.02831	7.77982	8.06686	2.29982e-05	1.32762	0.220492	0.341146	0.353733	0.0582166	1.60429	4.00231e-06	5.64538e-06	1.21348e-05	2.6341e-06	4.11623e-05	0.00354643	0.00889202	-0.0236372	-0.0965802	0.00636205
		MudTank 03	0.170647	22.4917	4.95926	7.67298	7.95638	1.05289e-05	1.30956	0.220492	0.341147	0.353747	0.0582241	1.60435	3.71617e-06	5.55881e-06	1.21564e-05	2.39844e-06	4.12822e-05
		SA02 03	0.152362	22.9021	5.04966	7.81292	8.10109	-4.59269e-08	1.33329	0.220489	0.341145	0.353727	0.0582168	1.60428	3.88618e-06	5.63084e-06	1.2796e-05	2.45148e-06	4.18966e-05	-0.0106959	-0.00532858	-0.0309092	-0.0946685	-0.000910085
		MudTank 04	0.169579	22.5731	4.97716	7.70073	7.98478	1.23309e-05	1.31422	0.220491	0.341147	0.35373	0.0582204	1.60428	4.02846e-06	5.29149e-06	1.07147e-05	2.03258e-06	3.68691e-05
		SA02 04	0.155208	22.8276	5.03332	7.78746	8.07491	3.31988e-05	1.32909	0.220493	0.341142	0.353735	0.0582231	1.60429	3.55449e-06	5.75087e-06	1.13685e-05	2.21289e-06	3.44201e-05	0.0125164	-0.00326938	0.0485404	0.0658914	0.0785418
		MudTank 05	0.166935	22.5917	4.98121	7.70692	7.99079	2.41179e-05	1.31524	0.220489	0.34114	0.353705	0.0582181	1.60419	4.0043e-06	6.26673e-06	1.33624e-05	1.93723e-06	4.09769e-05
		SA02 05	0.156816	22.8674	5.04215	7.80115	8.08888	1.53436e-05	1.33127	0.220495	0.341147	0.353729	0.0582169	1.60425	3.96205e-06	5.15391e-06	1.26507e-05	2.41055e-06	4.01392e-05	0.0151169	0.0208276	0.0241748	-0.0537831	0.0541755
		MudTank 06	0.165886	22.6575	4.99585	7.72937	8.01478	1.03876e-05	1.31917	0.220494	0.341139	0.353736	0.058222	1.60429	3.46186e-06	5.60624e-06	1.01662e-05	2.566e-06	3.32112e-05
		SA02 06	0.15785	22.8871	5.0464	7.80765	8.09569	3.06665e-05	1.33238	0.220491	0.341137	0.353722	0.0582151	1.60425	4.00852e-06	6.43635e-06	1.25534e-05	2.22216e-06	4.20432e-05	-0.00513512	-0.000843483	-0.0259717	-0.0738411	0.00402754
		MudTank 07	0.171682	22.7041	5.006	7.74516	8.03104	1.94623e-05	1.32175	0.220489	0.341136	0.353727	0.0582168	1.60428	3.39178e-06	5.65417e-06	1.1386e-05	2.2531e-06	4.11855e-05
		SA02 07	0.159231	23.0294	5.07769	7.8561	8.14583	2.33468e-05	1.34065	0.220487	0.341134	0.353715	0.058215	1.60424	3.44808e-06	4.94626e-06	1.05276e-05	2.01688e-06	3.86746e-05	-0.0165689	-0.0166589	-0.0252163	-0.0399738	0.00478292
		MudTank 08	0.168597	22.646	4.99326	7.72552	8.01035	2.08083e-05	1.3184	0.220492	0.341143	0.35372	0.0582178	1.60423	3.6404e-06	4.89735e-06	9.34641e-06	2.00207e-06	3.2918e-05
		SA02 08	0.15859	22.9733	5.06531	7.83729	8.12639	1.02405e-05	1.33756	0.220487	0.341148	0.353732	0.0582226	1.60432	3.53581e-06	5.15845e-06	1.04627e-05	2.043e-06	3.45615e-05	-0.00965885	0.0114453	0.0203193	0.0812695	0.0503199
		MudTank 09	0.166759	22.5797	4.97853	7.70298	7.98712	1.56246e-05	1.31454	0.220487	0.341146	0.35373	0.0582179	1.60431	3.5827e-06	4.89188e-06	1.08792e-05	2.07463e-06	3.92333e-05
		SA02 09	0.157377	22.9817	5.06721	7.83986	8.12888	2.90858e-05	1.33794	0.220489	0.341135	0.353711	0.0582178	1.60421	3.57357e-06	5.75002e-06	9.77637e-06	2.09487e-06	3.09066e-05	-0.004297	-0.0312968	-0.0712836	-0.0399094	-0.0412858
		MudTank 10	0.17278	22.5898	4.98089	7.70638	7.99095	2.10628e-05	1.31523	0.220493	0.341145	0.353742	0.0582223	1.60432	4.03248e-06	6.28686e-06	1.11052e-05	2.01624e-06	3.44193e-05
		SA02 10	0.155626	22.8898	5.04693	7.8086	8.09673	9.32328e-06	1.33258	0.220488	0.341139	0.353727	0.0582174	1.60429	4.31783e-06	7.34401e-06	1.30188e-05	2.46368e-06	3.85775e-05	-0.00963443	-0.0138649	-0.0275497	-0.0898053	0.00244949
		MudTank 11	0.173209	22.6666	4.9977	7.73253	8.01786	1.04622e-05	1.31971	0.220488	0.341142	0.353731	0.058223	1.60431	4.23993e-06	5.72882e-06	1.12376e-05	2.31987e-06	4.16542e-05
		SA02 11	0.154583	22.8125	5.03	7.78228	8.06949	1.93765e-05	1.3282	0.220493	0.341141	0.353731	0.0582223	1.60427	4.36737e-06	7.24647e-06	1.44589e-05	2.88569e-06	4.56165e-05	0.0122767	-0.00079088	-0.00295421	0.0125596	0.0270457
		MudTank 12	0.171865	22.5855	4.97996	7.70483	7.98926	2.21083e-05	1.31493	0.220493	0.34114	0.353733	0.0582201	1.60428	4.01581e-06	5.66691e-06	1.23718e-05	2.48401e-06	3.8581e-05
		SA02 12	0.15497	22.7468	5.01543	7.75998	8.0462	1.21695e-05	1.32437	0.22049	0.341146	0.353729	0.0582222	1.60429	3.9754e-06	6.0578e-06	1.15029e-05	2.23875e-06	3.7519e-05	-0.00357488	0.00903855	-0.0119733	0.0150704	0.0180264
		MudTank 13	0.172142	22.7097	5.00722	7.74733	8.03319	2.34543e-05	1.32222	0.220488	0.341146	0.353733	0.0582225	1.60432	4.00584e-06	5.85613e-06	1.18462e-05	1.94511e-06	3.86329e-05
		SA02 13	0.152221	22.9594	5.0623	7.83221	8.12112	1.22762e-05	1.33665	0.220489	0.341133	0.353717	0.0582182	1.60423	4.13501e-06	5.80088e-06	1.09449e-05	1.9531e-06	3.35583e-05	-0.00569107	-0.0395037	-0.0653011	-0.0972571	-0.0353031
		MudTank 14	0.169237	22.5736	4.97732	7.70091	7.98531	1.38828e-05	1.31435	0.220493	0.341147	0.353746	0.0582252	1.60434	4.27108e-06	6.92411e-06	1.24766e-05	2.31412e-06	3.9055e-05
		SA02 14	0.157077	22.8112	5.02968	7.78193	8.06908	1.38983e-05	1.32803	0.220492	0.341145	0.353733	0.0582184	1.60429	4.03633e-06	5.73175e-06	1.18305e-05	2.12344e-06	3.50668e-05	-0.010855	-0.00940756	-0.0334365	-0.0960512	-0.00343752
		MudTank 15	0.166235	22.4641	4.95323	7.66363	7.94656	1.56786e-05	1.30792	0.220495	0.34115	0.353744	0.0582228	1.60432	4.29751e-06	6.09928e-06	1.16063e-05	2.65735e-06	3.30907e-05
		SA02 15	0.151477	22.8558	5.03964	7.79715	8.08507	1.38241e-05	1.33067	0.220497	0.341145	0.353742	0.0582201	1.60429	4.33831e-06	6.04356e-06	1.2834e-05	2.6583e-06	4.09488e-05	0.0205091	-0.00708602	-0.00242066	-0.0379667	0.0275793
		MudTank 16	0.172682	22.671	4.99873	7.73411	8.01968	2.16458e-05	1.31995	0.22049	0.341146	0.353742	0.0582219	1.60434	3.43874e-06	5.02521e-06	9.86639e-06	1.90599e-06	3.53006e-05
		SA02 16	0.158971	23.0862	5.09024	7.87554	8.16611	2.18937e-05	1.34402	0.220488	0.341136	0.353723	0.0582174	1.60427	3.64765e-06	6.12008e-06	1.25149e-05	2.26286e-06	3.79669e-05	-0.0140897	-0.0271387	-0.0528048	-0.0649476	-0.0228064
		MudTank 17	0.173363	22.6625	4.9969	7.73117	8.01663	1.10923e-05	1.31941	0.220493	0.341145	0.353741	0.0582204	1.60432	3.68395e-06	5.63488e-06	1.09307e-05	2.60831e-06	3.60749e-05
		SA02 17	0.154501	22.8183	5.03134	7.78429	8.07161	2.23831e-05	1.32852	0.220496	0.341142	0.353734	0.0582216	1.60427	3.44004e-06	6.35926e-06	1.17463e-05	2.37576e-06	3.94777e-05	0.0288909	-0.00887343	-0.0049522	-0.0011438	0.0250476
		MudTank 18	0.172256	22.6187	4.98711	7.71627	8.00094	1.59732e-05	1.31693	0.220486	0.341145	0.353731	0.058223	1.60433	3.83331e-06	5.5058e-06	9.37132e-06	1.89132e-06	3.17161e-05
	3 (2021-03-26)	MudTank 01	0.16621	23.0736	5.08749	7.87142	8.16182	3.03473e-06	1.34332	0.220489	0.341143	0.353729	0.058219	1.60429	3.86215e-06	6.11897e-06	1.15072e-05	2.30238e-06	3.63289e-05
		SA02 01	0.134048	23.1129	5.09615	7.88512	8.17626	1.63555e-05	1.34586	0.220489	0.341156	0.353752	0.0582296	1.6044	3.32505e-06	5.04497e-06	1.01733e-05	1.99791e-06	3.46104e-05	-0.0111939	0.027821	0.0305449	0.129332	0.0605458
		MudTank 02	0.164845	22.8511	5.03853	7.79565	8.08366	1.9583e-05	1.33051	0.220494	0.34115	0.353753	0.0582251	1.60437	3.68605e-06	4.55778e-06	9.65584e-06	1.84627e-06	3.44415e-05
		SA02 02	0.146182	23.0602	5.08478	7.86729	8.15779	1.23309e-05	1.34279	0.2205	0.341162	0.35376	0.0582297	1.60436	4.31204e-06	5.73363e-06	1.23003e-05	2.25644e-06	3.71734e-05	0.0292665	0.0295356	0.0188088	0.0778602	0.0488094
		MudTank 03	0.166283	23.0547	5.08338	7.8652	8.15563	2.21811e-05	1.34236	0.220492	0.341155	0.353753	0.0582252	1.60438	3.82227e-06	6.11278e-06	1.10544e-05	2.51979e-06	3.64625e-05
		SA02 03	0.13029	23.0082	5.07314	7.84917	8.139	1.30137e-05	1.33968	0.220492	0.341146	0.353743	0.058226	1.60433	4.07259e-06	6.565e-06	1.10157e-05	1.90152e-06	3.2945e-05	-0.00114909	-0.01418	-0.018704	0.0437956	0.0112954
		MudTank 04	0.164896	23.0536	5.08315	7.86466	8.15512	1.13859e-05	1.34222	0.220493	0.341147	0.353746	0.0582217	1.60434	3.78044e-06	6.08308e-06	9.96476e-06	2.09664e-06	2.89735e-05
		SA02 04	0.143689	23.0061	5.07262	7.84844	8.13864	2.47801e-05	1.33961	0.22049	0.341146	0.35376	0.0582286	1.60443	3.54069e-06	5.44909e-06	1.0712e-05	1.90321e-06	3.79083e-05	-0.0218941	-0.0258385	0.0157133	0.0650542	0.0457138
		MudTank 05	0.166993	23.2637	5.12956	7.93669	8.22981	1.96768e-05	1.3546	0.220497	0.341162	0.353763	0.058228	1.60439	4.05138e-06	5.49807e-06	1.17729e-05	2.34758e-06	3.71634e-05
		SA02 05	0.147118	23.1986	5.11522	7.91429	8.20663	2.27978e-05	1.3508	0.220497	0.341153	0.353755	0.0582273	1.60436	3.66647e-06	5.82065e-06	1.0484e-05	1.94783e-06	3.29925e-05	0.00079279	-0.00474399	-0.00711311	0.0315505	0.0228867
		MudTank 06	0.165844	23.1372	5.10166	7.8932	8.18484	8.71954e-06	1.34712	0.220496	0.341147	0.353752	0.058223	1.60435	3.73125e-06	6.31797e-06	1.27426e-05	1.77007e-06	4.24255e-05
		SA02 06	0.145111	23.0384	5.07975	7.85971	8.15014	6.28987e-06	1.34151	0.220491	0.341157	0.353763	0.0582291	1.60444	3.96144e-06	5.75439e-06	1.13716e-05	2.20903e-06	3.77802e-05	-0.0123452	0.0278558	0.0572551	0.0940792	0.0872568
		MudTank 07	0.165053	23.0179	5.07522	7.85248	8.14218	3.12093e-05	1.3402	0.22049	0.341147	0.353733	0.0582244	1.6043	3.37666e-06	5.94945e-06	1.18462e-05	2.35417e-06	3.8337e-05
		SA02 07	0.146205	22.9895	5.06916	7.84302	8.13303	1.37233e-05	1.33862	0.220499	0.341157	0.353771	0.0582276	1.60441	3.95692e-06	5.94365e-06	1.1448e-05	2.44874e-06	4.28694e-05	0.0288711	0.00861763	0.0617511	0.00145835	0.0917529
		MudTank 08	0.164284	22.8867	5.04641	7.80804	8.09654	1.62879e-05	1.33271	0.220495	0.34116	0.353766	0.0582306	1.60442	3.60026e-06	5.94704e-06	1.08256e-05	2.06911e-06	3.5449e-05
		SA02 08	0.147095	23.0845	5.09005	7.87551	8.16639	1.67707e-05	1.34417	0.220497	0.341161	0.353761	0.0582283	1.60438	4.29319e-06	6.89464e-06	1.21532e-05	2.46473e-06	3.66554e-05	0.00408478	0.0144605	-0.0117142	-0.0174606	0.0182855
		MudTank 09	0.16365	22.8253	5.03292	7.7869	8.07481	1.17938e-05	1.32907	0.220497	0.341152	0.353765	0.0582279	1.6044	3.88057e-06	5.83663e-06	1.22213e-05	2.35989e-06	3.95866e-05
		SA02 09	0.145699	23.0454	5.08145	7.86198	8.1526	2.66078e-05	1.3419	0.220497	0.341151	0.353761	0.0582283	1.60438	3.88843e-06	5.59107e-06	1.14619e-05	2.03626e-06	3.71085e-05	0.00791418	0.00178574	0.0246393	0.0371907	0.05464
		MudTank 10	0.168531	22.9524	5.06085	7.83019	8.11917	2.21683e-05	1.33638	0.220493	0.34115	0.35374	0.0582243	1.60431	3.89714e-06	6.09485e-06	1.21311e-05	2.58399e-06	3.66117e-05
		SA02 10	0.145546	23.1824	5.11168	7.9091	8.20115	2.4184e-06	1.3499	0.220498	0.341168	0.353766	0.0582294	1.6044	4.13703e-06	6.33158e-06	1.16971e-05	2.65393e-06	3.52776e-05	0.010865	0.0411241	0.0599335	0.0635881	0.0899353
		MudTank 11	0.167671	23.0771	5.08846	7.87294	8.16352	1.06295e-05	1.34371	0.220498	0.341158	0.353749	0.058227	1.60432	3.8697e-06	5.79229e-06	1.17002e-05	2.28342e-06	3.6225e-05
		SA02 11	0.133248	22.8074	5.02906	7.78111	8.06881	1.54978e-05	1.32812	0.220502	0.341167	0.353781	0.0582321	1.60444	3.64337e-06	5.14517e-06	1.08143e-05	2.03778e-06	3.87877e-05	0.0201984	0.0336306	0.0873187	0.0971218	0.117321
		MudTank 12	0.166351	22.9794	5.06687	7.83946	8.12897	1.16134e-05	1.33799	0.220497	0.341152	0.353751	0.0582259	1.60434	3.5834e-06	5.0949e-06	1.04356e-05	1.88548e-06	3.54488e-05
		SA02 12	0.143524	23.0663	5.08595	7.86935	8.16029	2.40636e-05	1.3432	0.220493	0.341162	0.353775	0.0582322	1.60448	3.46139e-06	5.31211e-06	9.85359e-06	2.05352e-06	3.55407e-05	-0.0100475	0.0459902	0.0776006	0.10699	0.107603
		MudTank 13	0.166166	23.0518	5.08278	7.86394	8.15448	2.07012e-05	1.34222	0.220493	0.341141	0.353745	0.058226	1.60433	3.33666e-06	5.37562e-06	1.02436e-05	1.93377e-06	3.18893e-05
		SA02 13	0.130228	23.0238	5.0767	7.85492	8.14526	2.44592e-05	1.34073	0.220498	0.341165	0.353776	0.0582324	1.60444	3.94875e-06	5.67827e-06	1.07291e-05	2.20665e-06	3.33972e-05	0.00214629	0.0580164	0.0714222	0.101837	0.101424
		MudTank 14	0.164228	22.8412	5.03652	7.79226	8.0802	6.15503e-06	1.32997	0.220502	0.34115	0.353756	0.0582269	1.60432	3.71651e-06	5.17383e-06	9.27735e-06	1.93388e-06	3.49945e-05
		SA02 14	0.148262	23.1929	5.11401	7.91239	8.20485	1.588e-05	1.35049	0.220499	0.341157	0.353766	0.0582286	1.60439	3.67736e-06	5.75098e-06	1.11385e-05	2.13262e-06	4.27277e-05	0.010122	0.016923	0.0480476	0.0343757	0.078049
		MudTank 15	0.164092	22.8675	5.0421	7.80128	8.08921	9.58352e-06	1.33149	0.220492	0.341152	0.353743	0.0582263	1.60433	3.80278e-06	5.39219e-06	1.02826e-05	2.05507e-06	3.20594e-05
		SA02 15	0.130109	22.9781	5.06649	7.83945	8.12888	2.09091e-05	1.33808	0.220493	0.341171	0.353767	0.0582327	1.60444	3.5696e-06	5.98819e-06	1.04267e-05	1.89905e-06	3.43905e-05	-0.0135875	0.0357895	0.0416371	0.0823742	0.0716383
		MudTank 16	0.165177	22.7479	5.01589	7.76079	8.04732	1.12784e-05	1.3246	0.220499	0.341165	0.353761	0.0582295	1.60437	4.19438e-06	6.23956e-06	1.06497e-05	2.14814e-06	3.17284e-05
		SA02 16	0.148029	23.0612	5.0848	7.86732	8.15792	1.525e-05	1.3428	0.220492	0.34115	0.353751	0.0582279	1.60437	3.6043e-06	5.63063e-06	9.51546e-06	2.14489e-06	2.8004e-05	-0.0190847	-0.0388962	-0.0432268	-0.00590858	-0.013228
		MudTank 17	0.166873	22.8879	5.04663	7.80845	8.0971	1.85849e-05	1.33269	0.220494	0.341161	0.353772	0.0582271	1.60446	3.39141e-06	5.41352e-06	1.09965e-05	2.03399e-06	3.68747e-05
		SA02 17	0.13017	22.7076	5.00695	7.74704	8.03347	1.66025e-05	1.32237	0.220496	0.341164	0.353778	0.0582349	1.60447	4.15506e-06	5.17877e-06	1.09876e-05	2.35822e-06	3.52086e-05	0.00287263	0.0195569	0.0405665	0.134855	0.0705677
		MudTank 18	0.167369	23.0507	5.08262	7.86386	8.15432	2.69168e-05	1.34217	0.220497	0.341155	0.353756	0.0582271	1.60436	4.34996e-06	5.83263e-06	1.20622e-05	2.34095e-06	3.70665e-05
Shard 2	4 (2021-03-26)	MudTank 01	0.16515	23.1086	5.09522	7.88332	8.17442	2.03798e-05	1.34549	0.22049	0.341142	0.353738	0.0582246	1.60433	3.70156e-06	5.41624e-06	1.00334e-05	1.68162e-06	3.46573e-05
		SA02 01	0.120067	22.5619	4.97475	7.69705	7.98128	1.68296e-05	1.31372	0.220494	0.341153	0.353751	0.0582275	1.60436	3.51161e-06	5.33476e-06	1.00097e-05	1.95504e-06	3.39617e-05	-0.00470304	0.00863636	0.00313011	0.0136185	0.0331302
		MudTank 02	0.16487	23.0556	5.08374	7.8656	8.15619	1.06019e-05	1.3425	0.220499	0.341158	0.353762	0.0582288	1.60437	3.73409e-06	5.35893e-06	1.07658e-05	2.27295e-06	3.4962e-05
		SA02 02	0.125308	22.9235	5.05458	7.82054	8.10936	1.6623e-05	1.33481	0.220498	0.341158	0.353757	0.0582288	1.60436	3.94785e-06	5.78089e-06	1.15381e-05	1.94309e-06	3.65565e-05	0.0120476	0.00785441	-0.00482953	0.00065003	0.0251703
		MudTank 03	0.16468	22.9546	5.06127	7.831	8.12032	1.50563e-05	1.33661	0.220491	0.341152	0.353756	0.0582286	1.6044	4.21936e-06	6.14557e-06	1.35872e-05	2.76927e-06	4.797e-05
		SA02 03	0.11921	22.7719	5.021	7.76842	8.05526	2.28978e-05	1.32587	0.22049	0.34114	0.353736	0.0582238	1.60431	4.10996e-06	5.93699e-06	1.1747e-05	2.36267e-06	3.81935e-05	-0.00673553	-0.0386116	-0.0549392	-0.0756309	-0.0249409
		MudTank 04	0.165909	23.1584	5.10628	7.90058	8.19242	3.00501e-05	1.34846	0.220493	0.341153	0.353755	0.0582277	1.60438	4.24178e-06	6.28759e-06	1.17437e-05	1.95591e-06	3.38253e-05
		SA02 04	0.123346	22.7936	5.02568	7.77604	8.0631	2.52419e-05	1.32722	0.220486	0.341151	0.353745	0.0582278	1.60438	3.32639e-06	5.87654e-06	1.21496e-05	2.3063e-06	4.31549e-05	-0.0487609	-0.0220289	-0.0479975	-0.0172716	-0.017999
		MudTank 05	0.164927	23.1459	5.10371	7.89653	8.18829	6.55725e-06	1.34778	0.220502	0.341163	0.353768	0.05823	1.60438	3.3252e-06	5.31704e-06	9.49016e-06	2.23475e-06	3.56092e-05
		SA02 05	0.125473	22.8472	5.03768	7.79471	8.08269	1.84724e-05	1.33045	0.220494	0.341167	0.353771	0.0582327	1.60445	3.44558e-06	5.68194e-06	1.00349e-05	2.37886e-06	3.56887e-05	-0.00980186	0.0213314	0.0219275	0.0517921	0.0519281
		MudTank 06	0.163392	23.1094	5.09541	7.88389	8.17513	1.86117e-05	1.34564	0.220491	0.341156	0.353758	0.0582293	1.60441	3.93866e-06	6.34442e-06	1.11786e-05	2.05672e-06	3.98723e-05
		SA02 06	0.128645	23.1043	5.09434	7.88215	8.17321	2.549e-05	1.34525	0.220493	0.341155	0.353752	0.058225	1.60437	4.0236e-06	5.80325e-06	1.11999e-05	2.24077e-06	3.91538e-05	0.00444831	-0.0122351	-0.0191107	-0.0861476	0.0108887
		MudTank 07	0.164596	22.9726	5.06528	7.83737	8.12676	2.83426e-05	1.33771	0.220492	0.341162	0.353759	0.0582307	1.60441	3.93979e-06	5.72726e-06	1.08392e-05	2.18594e-06	3.54717e-05
		SA02 07	0.129739	23.133	5.10071	7.89183	8.18344	1.95293e-05	1.34697	0.220495	0.34115	0.353756	0.0582272	1.60437	3.71077e-06	5.12991e-06	1.09431e-05	2.33743e-06	3.42966e-05	0.00214859	-0.0252211	-0.0110091	-0.0457217	0.0189906
		MudTank 08	0.165173	23.13	5.10008	7.89091	8.18246	1.57463e-05	1.34683	0.220497	0.341155	0.35376	0.0582289	1.60438	3.98846e-06	6.46571e-06	1.20567e-05	2.43505e-06	3.90495e-05
		SA02 08	0.127373	22.97	5.06469	7.8362	8.12537	2.11437e-05	1.3374	0.220492	0.341149	0.353738	0.058224	1.60432	4.19441e-06	5.97329e-06	1.13618e-05	2.26549e-06	3.40061e-05	-0.0229183	-0.0276024	-0.0654651	-0.0782378	-0.0354671
		MudTank 09	0.163221	23.0273	5.07744	7.85605	8.14619	2.86583e-05	1.34084	0.220497	0.341162	0.353762	0.0582283	1.60439	3.85857e-06	5.36231e-06	1.21722e-05	2.15687e-06	4.05806e-05
		SA02 09	0.126427	22.9572	5.06187	7.83171	8.12092	1.63549e-05	1.33674	0.220491	0.341144	0.353742	0.0582274	1.60433	4.01216e-06	7.01676e-06	1.33483e-05	2.64676e-06	4.0414e-05	-0.0242567	-0.0510421	-0.0545061	-0.0289179	-0.0245077
		MudTank 10	0.165493	22.9775	5.06647	7.839	8.12852	2.08355e-05	1.33798	0.220497	0.34116	0.35376	0.0582299	1.60437	3.97474e-06	5.82185e-06	1.12684e-05	2.17466e-06	3.6361e-05
		SA02 10	0.124998	22.9397	5.05809	7.82593	8.11482	1.30018e-06	1.33568	0.220496	0.341153	0.353747	0.0582259	1.60433	4.36254e-06	5.54347e-06	1.21071e-05	2.04768e-06	3.85989e-05	0.00516938	-0.0100455	-0.0303128	-0.0416251	-0.0003137
		MudTank 11	0.167358	23.2818	5.13345	7.94266	8.23606	2.04606e-05	1.35562	0.220492	0.341153	0.353755	0.0582266	1.60439	3.98319e-06	6.04498e-06	1.18309e-05	2.40927e-06	3.86716e-05
		SA02 11	0.122557	22.8814	5.04529	7.80605	8.09446	1.20426e-05	1.33232	0.220497	0.341152	0.353757	0.0582273	1.60436	3.58618e-06	5.68628e-06	1.27403e-05	2.54858e-06	4.11823e-05	0.010066	-0.00784405	-0.00563321	0.0065022	0.0243666
		MudTank 12	0.164661	22.9563	5.06181	7.83168	8.12105	1.85921e-05	1.33668	0.220498	0.341156	0.353762	0.0582271	1.60438	4.40853e-06	5.80231e-06	1.2344e-05	2.38183e-06	3.93114e-05
		SA02 12	0.122078	22.5765	4.97791	7.70201	7.98654	2.46596e-05	1.31452	0.220491	0.341152	0.353755	0.0582251	1.6044	3.5966e-06	6.50721e-06	1.28436e-05	2.37398e-06	4.08904e-05	-0.0262759	-0.0103051	-0.000418188	-0.00630794	0.0295818
		MudTank 13	0.166115	23.2003	5.11556	7.91488	8.20706	1.64688e-05	1.35081	0.220495	0.341154	0.353747	0.0582238	1.60433	3.94147e-06	6.52535e-06	1.32069e-05	2.20023e-06	4.19598e-05
		SA02 13	0.117284	22.4246	4.94448	7.65	7.93203	1.2364e-05	1.30551	0.220493	0.341143	0.35372	0.0582175	1.60422	4.05996e-06	5.69525e-06	1.13636e-05	2.36409e-06	3.53653e-05	-0.0122995	-0.0367782	-0.106126	-0.158823	-0.0761288
		MudTank 14	0.164403	22.9489	5.06015	7.82916	8.11855	2.19075e-05	1.33631	0.220497	0.341157	0.353767	0.0582297	1.60441	3.67407e-06	5.65709e-06	1.00339e-05	1.76496e-06	2.92476e-05
		SA02 14	0.128007	23.0794	5.08878	7.87344	8.16412	1.55512e-05	1.34381	0.22049	0.341145	0.35374	0.0582255	1.60434	4.1328e-06	5.53495e-06	1.33275e-05	2.31123e-06	4.19553e-05	-0.0199124	-0.0219673	-0.0523567	-0.0544845	-0.0223582
		MudTank 15	0.165297	23.3079	5.13918	7.95143	8.24514	2.92471e-05	1.35716	0.220491	0.341148	0.353749	0.0582277	1.60437	3.82253e-06	5.95956e-06	1.29128e-05	2.28835e-06	4.11249e-05
		SA02 15	0.118173	22.5928	4.98157	7.70739	7.99175	1.35763e-05	1.31555	0.220493	0.341143	0.353729	0.0582286	1.60426	3.7108e-06	6.66366e-06	1.23576e-05	2.49121e-06	4.22485e-05	0.00217029	-0.0263876	-0.0629715	0.0534818	-0.0329734
		MudTank 16	0.165958	23.0678	5.08633	7.86973	8.16032	1.69181e-05	1.34308	0.220494	0.341156	0.353754	0.0582234	1.60437	3.54543e-06	6.00125e-06	1.09062e-05	2.36443e-06	3.95016e-05
		SA02 16	0.125616	22.5945	4.98193	7.70786	7.99197	2.14052e-05	1.31567	0.220493	0.341139	0.353712	0.0582295	1.60419	3.8845e-06	5.83404e-06	1.12562e-05	2.17278e-06	3.81021e-05	-0.00106421	-0.0478948	-0.106868	0.0924814	-0.0768712
		MudTank 17	0.166426	23.0405	5.08025	7.86036	8.1505	1.11383e-05	1.34153	0.220492	0.341154	0.353747	0.0582249	1.60435	3.31657e-06	4.7266e-06	9.55008e-06	2.16898e-06	2.98041e-05
		SA02 17	0.118155	22.355	4.92904	7.62626	7.9075	1.63009e-05	1.30152	0.22049	0.341144	0.353725	0.0582209	1.60427	3.9945e-06	6.32426e-06	1.12398e-05	2.27281e-06	3.44138e-05	0.000353499	-0.0291696	-0.0654402	-0.077813	-0.0354421
		MudTank 18	0.162981	22.7873	5.02431	7.77397	8.06099	1.17606e-05	1.32681	0.220487	0.341153	0.353749	0.0582259	1.6044	3.91401e-06	5.67583e-06	9.81169e-06	1.84212e-06	3.04001e-05
	5 (2021-03-26)	MudTank 01	0.164074	22.997	5.07076	7.84571	8.13566	2.67482e-05	1.33917	0.220497	0.341162	0.35377	0.0582323	1.60443	3.62758e-06	5.09548e-06	1.1365e-05	1.98917e-06	3.6679e-05
		SA02 01	0.125659	22.8621	5.04097	7.79984	8.08809	2.65479e-05	1.33127	0.220495	0.341169	0.353777	0.0582303	1.60447	4.19514e-06	5.62725e-06	1.15434e-05	1.81808e-06	3.55136e-05	-0.0128503	0.0189132	0.00618046	-0.0338748	0.0361806
		MudTank 02	0.165288	23.1029	5.09417	7.88186	8.17334	1.03471e-05	1.34533	0.220499	0.341163	0.35378	0.0582323	1.60445	3.53261e-06	5.58882e-06	1.11486e-05	2.32634e-06	3.63299e-05
		SA02 02	0.127908	22.8242	5.03273	7.78682	8.07493	2.41845e-05	1.32921	0.2205	0.341164	0.353787	0.0582369	1.60448	4.25111e-06	7.40895e-06	1.22614e-05	2.26912e-06	4.03975e-05	0.0124054	0.01213	0.0406872	0.0974301	0.0706885
		MudTank 03	0.163832	23.0195	5.07568	7.85325	8.14349	2.89052e-05	1.34042	0.220495	0.341157	0.353766	0.0582301	1.60441	3.59228e-06	5.69566e-06	1.0803e-05	2.41917e-06	3.8198e-05
		SA02 03	0.125041	23.0314	5.07823	7.85729	8.1477	1.92302e-06	1.34108	0.220492	0.341155	0.353765	0.0582285	1.60444	4.40589e-06	6.17673e-06	1.17292e-05	2.23412e-06	3.37656e-05	-0.0385902	-0.0244396	-0.0274203	-0.0742592	0.00257886
		MudTank 04	0.162707	22.9549	5.06167	7.83153	8.12105	9.01464e-06	1.33679	0.220505	0.341171	0.353783	0.0582356	1.60442	3.6174e-06	5.72162e-06	1.10355e-05	2.43696e-06	3.59059e-05
		SA02 04	0.128269	23.0285	5.0777	7.85626	8.14652	3.26212e-06	1.34094	0.220496	0.341154	0.353758	0.0582298	1.60437	4.26739e-06	5.46494e-06	1.00186e-05	1.84864e-06	2.97529e-05	-0.0159892	-0.0391906	-0.0547822	-0.0609846	-0.0247838
		MudTank 05	0.16226	23.0823	5.08953	7.87483	8.16584	2.88652e-05	1.3441	0.220495	0.341164	0.353771	0.0582311	1.60444	3.56176e-06	5.55883e-06	1.08068e-05	2.183e-06	4.18724e-05
		SA02 05	0.128163	22.834	5.03466	7.78992	8.07779	2.17058e-05	1.32964	0.220489	0.341154	0.353761	0.0582306	1.60444	4.12776e-06	5.506e-06	1.09586e-05	1.58288e-06	3.55074e-05	-0.0446282	-0.0383259	-0.0394012	-0.034254	-0.00940242
		MudTank 06	0.162065	23.0649	5.08588	7.86904	8.15987	2.59116e-05	1.34316	0.220503	0.341169	0.353779	0.0582341	1.60442	3.24286e-06	6.1163e-06	1.06362e-05	2.09167e-06	3.57962e-05
		SA02 06	0.134028	22.8184	5.03129	7.78467	8.07233	2.80686e-05	1.32864	0.220493	0.341157	0.353764	0.0582268	1.60443	4.24581e-06	5.08726e-06	1.02844e-05	1.8633e-06	2.47929e-05	-0.0200777	-0.0194181	-0.0237091	-0.130933	0.00629016
		MudTank 07	0.162479	22.8325	5.03437	7.78951	8.07736	1.7741e-05	1.32965	0.220491	0.341159	0.353766	0.0582347	1.60444	3.8052e-06	5.00542e-06	9.86357e-06	2.17819e-06	3.42512e-05
		SA02 07	0.139627	22.884	5.04584	7.80715	8.09551	2.05543e-05	1.33256	0.220496	0.341162	0.353763	0.0582312	1.60439	4.03877e-06	5.76153e-06	9.7111e-06	1.78113e-06	3.14971e-05	0.00103255	-0.00547773	-0.0122268	-0.0228721	0.0177729
		MudTank 08	0.163146	23.0761	5.08829	7.87282	8.16358	2.98043e-05	1.34373	0.220501	0.341168	0.353768	0.0582304	1.60439	4.1105e-06	5.85176e-06	1.28573e-05	2.55932e-06	4.44548e-05
		SA02 08	0.130919	22.7737	5.02168	7.76951	8.05667	1.60749e-05	1.32613	0.220503	0.341161	0.35377	0.0582306	1.60438	3.81997e-06	6.21217e-06	1.22201e-05	2.25247e-06	3.94048e-05	0.02792	-0.00276069	0.0212475	0.0447716	0.0512481
		MudTank 09	0.163175	23.1665	5.10805	7.90338	8.19533	2.02394e-05	1.34888	0.220493	0.341156	0.353757	0.0582256	1.60439	3.49833e-06	5.8268e-06	1.13538e-05	2.16197e-06	3.56987e-05
		SA02 09	0.127135	22.5832	4.97951	7.70452	7.98906	8.82116e-06	1.31501	0.220496	0.341161	0.35376	0.0582296	1.60439	3.69605e-06	4.70215e-06	1.04256e-05	2.03824e-06	3.38919e-05	0.0202631	0.0186942	0.0269811	0.0668637	0.0569819
		MudTank 10	0.164217	22.9603	5.06252	7.83299	8.12207	5.51206e-06	1.33688	0.22049	0.341153	0.353744	0.0582258	1.60435	3.55772e-06	6.13654e-06	1.1356e-05	2.51756e-06	4.12225e-05
		SA02 10	0.125909	22.6734	4.99947	7.73532	8.02087	2.08687e-05	1.32027	0.220499	0.341162	0.353756	0.0582297	1.60434	4.19922e-06	5.77249e-06	1.10927e-05	2.15715e-06	3.23989e-05	0.0165633	-0.00397982	-0.0033449	0.0340242	0.026655
		MudTank 11	0.162892	22.8039	5.02827	7.78009	8.06734	2.07483e-05	1.32786	0.220501	0.341174	0.353771	0.0582297	1.6044	3.67337e-06	6.31816e-06	1.14901e-05	2.15182e-06	3.74134e-05
		SA02 11	0.125994	22.8675	5.04217	7.80141	8.08975	2.04073e-05	1.33161	0.220495	0.341157	0.353766	0.0582316	1.60442	3.79067e-06	6.09394e-06	1.2421e-05	2.66717e-06	4.12531e-05	-0.0278674	-0.0311605	-0.00097247	0.0350756	0.0290275
		MudTank 12	0.164282	22.9975	5.07095	7.84581	8.13563	2.0387e-05	1.33913	0.220501	0.34116	0.353762	0.0582295	1.60436	3.13808e-06	6.1262e-06	1.05792e-05	1.9374e-06	3.72226e-05
		SA02 12	0.127673	23.0385	5.07997	7.85973	8.15048	3.00101e-05	1.34158	0.220499	0.341156	0.353776	0.0582322	1.60443	3.99524e-06	6.06655e-06	1.25633e-05	2.35693e-06	3.9036e-05	0.0043127	-0.00397826	0.0369035	0.0413847	0.0669046
		MudTank 13	0.163063	22.9189	5.05352	7.81889	8.10785	2.178e-05	1.33457	0.220496	0.341155	0.353763	0.0582301	1.6044	3.75698e-06	6.34219e-06	1.11196e-05	2.16969e-06	3.59731e-05
		SA02 13	0.124606	22.9811	5.06737	7.84031	8.13015	1.32212e-05	1.33819	0.220501	0.341163	0.353776	0.0582303	1.60441	3.84753e-06	6.20525e-06	1.14839e-05	2.00706e-06	3.54226e-05	0.0198956	0.0253389	0.0267959	0.0106639	0.0567967
		MudTank 14	0.163326	23.0491	5.08228	7.8633	8.15406	-4.74476e-07	1.34213	0.220498	0.341155	0.353769	0.0582292	1.60441	3.89836e-06	4.69364e-06	9.72803e-06	1.95535e-06	3.13012e-05
		SA02 14	0.12994	22.8215	5.03202	7.78571	8.07334	3.04791e-05	1.32881	0.220495	0.341157	0.35376	0.0582262	1.60439	3.96506e-06	6.13467e-06	1.09935e-05	2.1666e-06	3.38575e-05	-0.0201799	-0.000292283	-0.0207726	-0.0519557	0.0092268
		MudTank 15	0.162262	23.0073	5.07313	7.84916	8.1392	3.71831e-05	1.33969	0.220501	0.34116	0.353767	0.0582292	1.60438	3.82066e-06	5.59745e-06	1.12588e-05	2.50857e-06	3.49904e-05
		SA02 15	0.125273	23.0628	5.08522	7.86817	8.15924	1.5625e-05	1.34305	0.220494	0.341162	0.353783	0.0582347	1.6045	3.91033e-06	5.61765e-06	1.08581e-05	1.9692e-06	3.61361e-05	-0.0246268	0.0034156	0.0460046	0.0914116	0.076006
		MudTank 16	0.162108	22.7609	5.01874	7.76517	8.05206	3.08481e-07	1.32536	0.220498	0.341163	0.353767	0.0582296	1.6044	3.16414e-06	6.08468e-06	1.04432e-05	2.02012e-06	3.42567e-05
		SA02 16	0.128964	22.6957	5.00437	7.74298	8.02929	9.27785e-06	1.32166	0.220498	0.341165	0.35378	0.0582341	1.60446	3.76206e-06	6.06177e-06	1.17298e-05	2.09586e-06	3.91452e-05	-0.00341068	0.0133404	0.0426334	0.099608	0.0726346
		MudTank 17	0.163369	22.9265	5.05529	7.82155	8.11054	1.65216e-05	1.33494	0.2205	0.341158	0.353763	0.058227	1.60437	3.41614e-06	4.98947e-06	1.0603e-05	2.03504e-06	3.52204e-05
		SA02 17	0.126846	23.1141	5.0966	7.88578	8.17744	2.43241e-05	1.34596	0.220497	0.341167	0.353785	0.0582309	1.60449	3.79953e-06	5.47947e-06	1.11802e-05	2.26669e-06	3.84092e-05	-0.00531907	0.0443529	0.0707289	0.0625947	0.100731
		MudTank 18	0.164079	22.9499	5.06038	7.82926	8.11869	2.05938e-05	1.33631	0.220497	0.341146	0.353757	0.0582274	1.60436	3.48917e-06	5.11552e-06	1.09289e-05	2.04876e-06	3.92832e-05
	6 (2021-03-26)	MudTank 01	0.16313	23.0981	5.09295	7.87999	8.17134	2.41101e-05	1.34498	0.220492	0.341153	0.353766	0.0582289	1.60444	3.7041e-06	4.802e-06	1.15541e-05	2.08619e-06	4.04676e-05
		SA02 01	0.125692	22.7864	5.02421	7.77368	8.06056	1.21359e-05	1.32668	0.220491	0.341154	0.353744	0.0582222	1.60434	3.92943e-06	6.24737e-06	1.21151e-05	1.99746e-06	3.77466e-05	-0.0246619	-0.0111914	-0.0876793	-0.155227	-0.057682
		MudTank 02	0.16398	23.1557	5.10585	7.89986	8.19209	4.71827e-05	1.34844	0.220501	0.341163	0.353783	0.0582335	1.60445	3.18997e-06	4.57274e-06	8.548e-06	1.70018e-06	3.09219e-05
		SA02 02	0.127911	22.714	5.00846	7.74909	8.0353	2.2698e-05	1.32265	0.220501	0.341159	0.35376	0.0582305	1.60435	3.51722e-06	6.1216e-06	1.23543e-05	2.14969e-06	4.19582e-05	0.0152995	-0.0142207	-0.0685702	-0.0389974	-0.0385723
		MudTank 03	0.15592	23.1367	5.10151	7.89346	8.18544	2.68755e-05	1.3473	0.220494	0.341166	0.353786	0.058232	1.60451	3.8576e-06	5.76021e-06	1.16404e-05	2.25893e-06	3.4673e-05
		SA02 03	0.12474	22.8893	5.0469	7.80878	8.0972	2.62002e-05	1.33284	0.220491	0.341154	0.353754	0.0582299	1.60439	3.89496e-06	5.73252e-06	1.08284e-05	1.95731e-06	3.50533e-05	-0.0118052	-0.0235163	-0.0605218	-0.0409352	-0.0305236
		MudTank 04	0.162013	23.0629	5.08522	7.86806	8.15883	1.20757e-05	1.34301	0.220494	0.341157	0.353765	0.0582325	1.60442	4.10575e-06	5.11252e-06	1.03686e-05	1.5799e-06	3.26799e-05
		SA02 04	0.127745	22.9499	5.06026	7.82931	8.11861	2.13042e-05	1.3363	0.220491	0.341148	0.353754	0.0582269	1.60439	3.65463e-06	5.62495e-06	9.59567e-06	2.09565e-06	2.96039e-05	-0.0231538	-0.0411886	-0.0388373	-0.107628	-0.0088385
		MudTank 05	0.16234	23.1094	5.0956	7.88415	8.17542	1.82705e-05	1.34575	0.220499	0.341166	0.35377	0.0582338	1.60441	3.93868e-06	5.69482e-06	1.11608e-05	1.96013e-06	3.47549e-05
		SA02 05	0.12779	22.7103	5.00731	7.74769	8.03368	1.50631e-05	1.32237	0.220486	0.341153	0.353745	0.0582277	1.60439	4.08248e-06	5.45898e-06	1.13585e-05	2.10225e-06	3.53377e-05	-0.0512757	-0.038771	-0.0775295	-0.0724647	-0.0475318
		MudTank 06	0.161063	23.032	5.07848	7.85775	8.14818	1.89939e-05	1.34116	0.220496	0.341166	0.353775	0.05823	1.60445	3.66182e-06	5.62124e-06	1.23113e-05	2.02117e-06	4.02099e-05
		SA02 06	0.139272	22.8922	5.04763	7.80978	8.09849	1.16337e-05	1.33305	0.220496	0.341155	0.353766	0.0582316	1.60441	3.74581e-06	6.12238e-06	1.10321e-05	2.18425e-06	3.51523e-05	-0.00813173	-0.0315879	-0.0306043	0.0188729	-0.000605202
		MudTank 07	0.163309	23.188	5.11294	7.91096	8.20345	2.49345e-07	1.35026	0.220499	0.341166	0.35378	0.0582311	1.60445	3.8307e-06	5.09344e-06	9.85632e-06	2.23477e-06	3.0395e-05
		SA02 07	0.142012	22.8266	5.033	7.78716	8.07447	1.02547e-05	1.32904	0.220489	0.341144	0.353731	0.0582234	1.60431	3.24075e-06	5.95771e-06	1.05994e-05	2.29146e-06	3.72437e-05	-0.0603225	-0.069496	-0.15745	-0.152681	-0.127454
		MudTank 08	0.163312	23.2285	5.12199	7.92488	8.2181	9.66516e-06	1.35267	0.220504	0.34117	0.353794	0.0582334	1.60448	4.09472e-06	5.79766e-06	9.47661e-06	2.21378e-06	3.05744e-05
		SA02 08	0.133787	22.7198	5.00959	7.75094	8.0374	9.70394e-06	1.32304	0.220494	0.341153	0.353762	0.058233	1.6044	4.80099e-06	6.05947e-06	1.25938e-05	2.47423e-06	4.03963e-05	-0.0293665	-0.035499	-0.0780658	-0.00394852	-0.0480682
		MudTank 09	0.162445	23.1251	5.099	7.88935	8.18129	1.47745e-05	1.34664	0.220497	0.34116	0.353785	0.058233	1.60449	3.17421e-06	5.93294e-06	1.18761e-05	1.85184e-06	4.2846e-05
		SA02 09	0.128606	22.8056	5.02844	7.77995	8.06726	3.73237e-05	1.32785	0.220491	0.341142	0.353739	0.0582245	1.60432	3.84023e-06	7.32353e-06	1.32589e-05	2.67859e-06	4.14425e-05	-0.0240111	-0.0477978	-0.099585	-0.129691	-0.069588
		MudTank 10	0.160552	22.7151	5.00859	7.74938	8.03579	1.88131e-05	1.32273	0.220496	0.341156	0.353764	0.0582312	1.6044	3.83679e-06	5.18404e-06	1.04426e-05	2.13542e-06	3.31493e-05
		SA02 10	0.127798	22.891	5.0472	7.80922	8.09762	2.90328e-05	1.33282	0.220488	0.341147	0.353745	0.0582246	1.60438	3.99531e-06	6.31031e-06	1.24695e-05	2.2291e-06	4.08359e-05	-0.0473095	-0.0318538	-0.0727359	-0.115167	-0.0427381
		MudTank 11	0.165721	23.2846	5.13428	7.9438	8.2376	1.92146e-05	1.3559	0.220501	0.341161	0.353778	0.0582315	1.60443	3.8983e-06	6.47251e-06	1.12021e-05	2.55213e-06	3.53913e-05
		SA02 11	0.12795	23.1518	5.10489	7.89846	8.19015	2.12713e-05	1.34811	0.220497	0.34116	0.353759	0.0582292	1.60437	3.17813e-06	5.55753e-06	1.0235e-05	2.27487e-06	3.62259e-05	0.00431749	0.000809643	-0.0397129	-0.019686	-0.00971411
		MudTank 12	0.163963	23.2001	5.1154	7.91489	8.20743	2.59446e-05	1.35092	0.220491	0.341158	0.353767	0.0582291	1.60445	3.99068e-06	6.05176e-06	1.13511e-05	1.99775e-06	3.51211e-05
		SA02 12	0.126326	22.774	5.02141	7.7695	8.05637	2.94875e-05	1.32608	0.220488	0.341156	0.353752	0.0582277	1.6044	3.47359e-06	4.90544e-06	1.1228e-05	1.76956e-06	3.80339e-05	-0.0284754	-0.0271278	-0.0585327	-0.0399721	-0.0285345
		MudTank 13	0.162767	23.1313	5.10043	7.89178	8.18336	2.78267e-05	1.34696	0.220499	0.341173	0.353779	0.058231	1.60445	3.8186e-06	5.59255e-06	1.12215e-05	2.35403e-06	4.12241e-05
		SA02 13	0.125998	23.1727	5.10962	7.90559	8.19751	1.67436e-05	1.34934	0.220502	0.34116	0.353758	0.0582297	1.60433	3.54623e-06	5.20819e-06	1.09287e-05	1.93149e-06	3.82635e-05	0.0224862	-0.0204107	-0.0498298	-0.0141044	-0.0198313
		MudTank 14	0.162918	23.2244	5.12089	7.92328	8.21615	1.76416e-05	1.35236	0.220496	0.341161	0.353772	0.05823	1.60444	3.86602e-06	5.78431e-06	1.04198e-05	2.4531e-06	3.08083e-05
		SA02 14	0.132312	22.8415	5.03627	7.79231	8.08029	1.57054e-05	1.33002	0.220488	0.341147	0.353755	0.0582283	1.60442	4.12749e-06	6.6634e-06	1.14382e-05	2.36443e-06	3.63119e-05	-0.0407188	-0.0464775	-0.0670205	-0.0661834	-0.0370225
		MudTank 15	0.162764	23.1763	5.11033	7.90693	8.19942	2.39024e-05	1.34965	0.220498	0.341165	0.353785	0.0582343	1.60448	3.7687e-06	6.25707e-06	1.23912e-05	2.50467e-06	3.96449e-05
		SA02 15	0.124336	22.9673	5.06411	7.83555	8.12509	1.43997e-05	1.33743	0.220492	0.341161	0.353768	0.0582322	1.60445	3.63186e-06	5.73749e-06	1.10422e-05	2.42343e-06	3.89205e-05	-0.0153044	0.00617978	-0.0131449	0.0134972	0.0168547
		MudTank 16	0.163447	22.9429	5.05876	7.82703	8.11627	2.73516e-05	1.33592	0.220494	0.341154	0.353761	0.0582285	1.6044	3.61796e-06	6.85282e-06	1.27814e-05	2.97004e-06	4.35366e-05
		SA02 16	0.131537	22.9163	5.05288	7.81793	8.1066	2.68557e-05	1.33436	0.220493	0.341152	0.353748	0.0582278	1.60435	4.29199e-06	6.50682e-06	1.26778e-05	2.19491e-06	3.8765e-05	-0.00864341	-0.0150398	-0.0508393	-0.0183158	-0.0208408
		MudTank 17	0.161815	22.9559	5.06168	7.83162	8.12113	2.72241e-05	1.3367	0.220496	0.34116	0.353771	0.0582291	1.60443	4.19956e-06	6.34307e-06	1.17418e-05	2.11785e-06	2.98549e-05
		SA02 17	0.126429	23.0338	5.07888	7.85815	8.1488	3.27097e-05	1.34123	0.220497	0.341158	0.353776	0.0582286	1.60445	3.54034e-06	5.0025e-06	1.01961e-05	2.00028e-06	3.39214e-05	0.00468301	-0.00192677	0.0074906	-0.0231572	0.0374908
		MudTank 18	0.149963	23.2064	5.11691	7.91703	8.20986	1.48815e-05	1.35133	0.220495	0.341157	0.353775	0.0582308	1.60446	4.01516e-06	5.09808e-06	1.00212e-05	1.99328e-06	3.11704e-05
Shard3	7 (2021-03-26)	MudTank 01	0.158709	22.8542	5.03902	7.79627	8.08394	5.54505e-06	1.33045	0.220485	0.34113	0.353717	0.0582144	1.60427	3.83259e-06	6.08782e-06	1.14128e-05	2.30302e-06	3.36274e-05
		SA02 01	0.158037	22.9592	5.06234	7.83247	8.12144	1.30135e-05	1.33653	0.220493	0.341147	0.353734	0.0582133	1.60429	3.92976e-06	6.32376e-06	1.28285e-05	2.44366e-06	4.05798e-05	0.0289243	0.04787	0.0391639	-0.0517038	0.069165
		MudTank 02	0.160135	23.0124	5.07394	7.85025	8.14	2.25488e-05	1.33974	0.220488	0.341132	0.353723	0.0582182	1.60427	4.13568e-06	5.99829e-06	1.31585e-05	2.32497e-06	4.33672e-05
		SA02 02	0.159201	23.0405	5.08013	7.85976	8.1495	1.48504e-05	1.34122	0.220487	0.341129	0.353704	0.0582117	1.60419	3.99158e-06	5.81084e-06	1.09012e-05	2.37375e-06	3.59859e-05	0.00950146	-0.00251169	-0.0333194	-0.046377	-0.00332043
		MudTank 03	0.160031	23.0156	5.07454	7.85125	8.14083	8.80778e-06	1.33975	0.220483	0.341127	0.353709	0.0582105	1.60425	4.05858e-06	5.36146e-06	1.17653e-05	2.43474e-06	3.82365e-05
		SA02 03	0.160427	23.0206	5.07572	7.85294	8.14289	1.72247e-06	1.34018	0.220485	0.341126	0.353721	0.0582165	1.60428	4.50608e-06	6.60462e-06	1.26031e-05	2.21034e-06	3.80002e-05	-0.00418463	-0.00863692	0.0276548	0.0739144	0.0576557
		MudTank 04	0.1601	23.0277	5.07737	7.85544	8.14517	8.36499e-06	1.34053	0.22049	0.341131	0.353713	0.058214	1.60421	3.85083e-06	6.29367e-06	1.22001e-05	2.30342e-06	4.40177e-05
		SA02 04	0.158856	23.0007	5.07139	7.84646	8.13592	1.36152e-05	1.33901	0.220488	0.34114	0.353725	0.0582159	1.60428	3.70481e-06	5.93749e-06	1.26351e-05	2.49769e-06	4.05631e-05	-0.00562591	0.0102218	0.00927986	0.0364571	0.0392801
		MudTank 05	0.158689	23.0128	5.07404	7.8506	8.14029	9.88564e-06	1.33965	0.220488	0.341142	0.35373	0.0582136	1.6043	4.14206e-06	6.19588e-06	1.14072e-05	2.29705e-06	3.68417e-05
		SA02 05	0.15802	22.8427	5.03661	7.79221	8.07932	1.70118e-05	1.32962	0.220491	0.341125	0.353694	0.058208	1.60412	4.1317e-06	5.85683e-06	1.07137e-05	2.2208e-06	3.83237e-05	0.00663251	-0.0422595	-0.0896801	-0.141297	-0.0596828
		MudTank 06	0.158828	22.9771	5.06626	7.83835	8.12751	1.37109e-05	1.3377	0.220492	0.341137	0.353722	0.0582188	1.60424	3.9154e-06	6.1348e-06	1.16226e-05	1.97418e-06	3.73637e-05
		SA02 06	0.159948	22.9805	5.06691	7.83929	8.12821	1.3228e-05	1.33765	0.220487	0.341128	0.3537	0.0582081	1.60417	3.56296e-06	5.24728e-06	1.02133e-05	2.10563e-06	3.33006e-05	-0.0109691	-0.0312155	-0.0636356	-0.14195	-0.0336375
		MudTank 07	0.159572	22.9279	5.05531	7.82161	8.11011	7.07899e-06	1.33473	0.220487	0.341139	0.353722	0.058214	1.60428	3.90953e-06	5.72023e-06	1.17565e-05	2.50455e-06	3.67252e-05
		SA02 07	0.159374	22.803	5.02777	7.77866	8.06564	1.56724e-05	1.32735	0.220488	0.341125	0.353711	0.0582096	1.60422	4.04751e-06	6.70378e-06	1.33938e-05	2.75647e-06	4.25939e-05	-0.0148085	-0.0385957	-0.0216086	-0.0654519	0.00839073
		MudTank 08	0.157526	22.9065	5.05077	7.81428	8.10237	7.69589e-06	1.33345	0.220495	0.341138	0.353715	0.0582128	1.60419	4.30526e-06	6.15752e-06	1.24511e-05	2.46191e-06	4.51975e-05
		SA02 08	0.159355	22.9319	5.05621	7.82272	8.11122	1.96297e-05	1.33482	0.220488	0.341128	0.353709	0.0582079	1.60421	3.59353e-06	6.66846e-06	1.36665e-05	2.82056e-06	4.44629e-05	-0.0305061	-0.024684	-0.00685046	-0.0800073	0.0231493
		MudTank 09	0.15817	22.9018	5.04971	7.81259	8.10051	1.8585e-05	1.33316	0.220494	0.341135	0.353707	0.0582122	1.60416	4.4035e-06	7.73777e-06	1.56756e-05	3.02874e-06	5.39998e-05
		SA02 09	0.156471	22.6919	5.00303	7.74035	8.02536	4.95057e-06	1.32073	0.220476	0.341106	0.353666	0.0582025	1.6041	3.77195e-06	5.5907e-06	1.0694e-05	2.0441e-06	3.56221e-05	-0.0735945	-0.0748575	-0.127809	-0.170142	-0.0978131
		MudTank 10	0.159206	22.776	5.02189	7.76952	8.05621	8.91193e-07	1.32585	0.22049	0.341127	0.353715	0.0582125	1.60422	4.14686e-06	6.01897e-06	1.27198e-05	2.59865e-06	4.08319e-05
		SA02 10	0.15804	22.8832	5.04542	7.80598	8.09391	2.37962e-05	1.33203	0.220485	0.341122	0.353705	0.0582102	1.60421	4.47155e-06	6.27148e-06	1.32217e-05	2.77181e-06	3.93563e-05	-0.00467613	-0.00064024	0.00046574	0.00636117	0.0304658
		MudTank 11	0.160066	22.9124	5.05178	7.81581	8.10399	2.34344e-05	1.33366	0.220483	0.341118	0.353696	0.0582071	1.60419	4.56643e-06	6.7417e-06	1.28099e-05	2.9301e-06	3.86237e-05
		SA02 11	0.157638	23.0074	5.07287	7.84848	8.13763	1.18348e-05	1.33921	0.220488	0.341128	0.353695	0.0582077	1.60415	4.09228e-06	5.24506e-06	1.14526e-05	2.14266e-06	3.88335e-05	0.0262017	0.0273195	0.00793301	-0.00601659	0.0379332
		MudTank 12	0.159955	23.0104	5.0734	7.8493	8.13855	2.31254e-05	1.33942	0.220482	0.341119	0.35369	0.0582091	1.60416	4.4303e-06	6.12676e-06	1.28043e-05	2.42999e-06	4.0344e-05
		SA02 12	0.159887	23.2677	5.13033	7.93737	8.23008	2.69292e-05	1.35438	0.220492	0.341133	0.353714	0.058209	1.6042	3.85302e-06	7.00199e-06	1.30797e-05	2.47392e-06	4.49573e-05	0.0294592	0.0349423	0.0363108	-0.012936	0.0663119
		MudTank 13	0.160445	23.0437	5.08086	7.86073	8.15083	2.59117e-05	1.34138	0.220489	0.341123	0.353713	0.0582105	1.60422	4.77713e-06	5.77535e-06	1.33673e-05	2.42614e-06	3.82844e-05
		SA02 13	0.160164	23.0372	5.0794	7.85848	8.14785	1.90741e-05	1.34091	0.220487	0.341122	0.353683	0.0582065	1.6041	4.02125e-06	6.40637e-06	1.18678e-05	2.02102e-06	3.68695e-05	-0.01211	0.00539685	-0.0461458	-0.0399935	-0.0161472
		MudTank 14	0.158544	22.9811	5.06715	7.83926	8.1281	-3.52672e-07	1.33767	0.220492	0.341118	0.353686	0.0582072	1.60408	4.09268e-06	5.95395e-06	1.18814e-05	2.0924e-06	3.72884e-05
		SA02 14	0.159028	22.974	5.06544	7.83694	8.12607	1.98646e-05	1.33728	0.220486	0.341122	0.353707	0.0582084	1.60422	3.84634e-06	6.34201e-06	1.22843e-05	2.00355e-06	4.13398e-05	-0.0209149	0.00706192	0.0411171	0.0345087	0.0711183
		MudTank 15	0.159398	23.0585	5.08414	7.86574	8.15575	3.59134e-06	1.34213	0.220489	0.341122	0.353699	0.0582056	1.60416	3.41113e-06	5.96123e-06	1.22281e-05	2.56333e-06	4.17601e-05
		SA02 15	0.158978	22.8517	5.03851	7.79527	8.08278	2.17858e-05	1.33024	0.220487	0.341125	0.353707	0.0582121	1.6042	3.87476e-06	6.15581e-06	1.23781e-05	2.82e-06	3.75705e-05	-0.00614849	0.00806269	0.0212973	0.0669068	0.0512979
		MudTank 16	0.160456	22.9706	5.06475	7.83578	8.12468	2.33269e-05	1.33714	0.220488	0.341121	0.353698	0.0582108	1.60416	3.39344e-06	5.91786e-06	1.18889e-05	2.2134e-06	4.00824e-05
		SA02 16	0.15951	23.011	5.07362	7.84965	8.13899	1.46809e-05	1.33945	0.220487	0.341126	0.3537	0.0582093	1.60418	3.80545e-06	6.38015e-06	1.12058e-05	2.02956e-06	3.8338e-05	-0.0200755	0.00623331	-0.00556238	-0.0228067	0.0244375
		MudTank 17	0.160587	22.9071	5.05089	7.81423	8.10236	2.39902e-05	1.33343	0.220494	0.341127	0.353705	0.0582104	1.60415	3.98209e-06	6.86757e-06	1.36155e-05	2.79791e-06	4.38094e-05
		SA02 17	0.159192	23.0221	5.07614	7.85358	8.14308	1.68185e-05	1.34013	0.22049	0.341132	0.353707	0.0582109	1.60419	3.72008e-06	5.51375e-06	1.13877e-05	2.45659e-06	3.76673e-05	-0.000126529	0.0315838	0.0339757	0.0483935	0.0639768
		MudTank 18	0.160383	23.0464	5.0814	7.86149	8.15117	1.85852e-05	1.34143	0.220485	0.341116	0.353685	0.0582057	1.60412	4.11803e-06	5.98457e-06	1.24795e-05	2.39181e-06	3.78411e-05
	8 (2021-03-27)	MudTank 01	0.158527	22.8297	5.03376	7.78802	8.07542	3.31373e-05	1.32903	0.220491	0.341135	0.353724	0.0582149	1.60425	3.96687e-06	6.06455e-06	1.20363e-05	2.22793e-06	3.96477e-05
		SA02 01	0.15467	23.0584	5.08409	7.86592	8.1559	2.20743e-05	1.34232	0.220487	0.34113	0.353706	0.0582137	1.6042	4.60977e-06	7.10705e-06	1.31483e-05	2.61582e-06	4.00715e-05	-0.0140667	-0.0283319	-0.0468865	-0.0106526	-0.0168879
		MudTank 02	0.160801	22.8993	5.04906	7.81196	8.09998	1.82571e-05	1.33306	0.22049	0.341143	0.353721	0.0582137	1.60425	3.81018e-06	5.2414e-06	1.22006e-05	2.3828e-06	3.92451e-05
		SA02 02	0.156579	22.9433	5.05868	7.8267	8.11523	1.94891e-05	1.33556	0.220486	0.341132	0.353708	0.0582114	1.60422	3.69536e-06	5.90724e-06	1.18719e-05	2.52209e-06	4.37271e-05	-0.0131847	-0.0274777	-0.0412697	-0.050797	-0.0112709
		MudTank 03	0.159334	22.8374	5.03537	7.79073	8.07814	2.29322e-05	1.32948	0.220488	0.341139	0.353724	0.058215	1.60428	4.06354e-06	5.75689e-06	1.21153e-05	2.41766e-06	3.88346e-05
		SA02 03	0.152771	22.9866	5.06826	7.84124	8.13035	2.37146e-05	1.33804	0.220487	0.341122	0.3537	0.0582096	1.60417	3.72486e-06	6.37201e-06	1.34863e-05	2.64253e-06	4.3888e-05	0.00658407	-0.098935	-0.115032	-0.570217	-0.0850351
		MudTank 04	0.168876	19.98	4.40528	6.81664	7.06808	0.000520424	1.16425	0.220484	0.341173	0.353757	0.0582705	1.60446	4.06281e-06	7.34209e-06	1.39319e-05	4.7572e-06	4.75587e-05
		SA02 04	0.155679	22.8907	5.04699	7.80848	8.09669	2.19407e-05	1.33245	0.220482	0.34112	0.35371	0.0582093	1.60426	4.34942e-06	5.8056e-06	1.14652e-05	1.73303e-06	3.484e-05	-0.0192624	-0.0927862	-0.061583	-0.553869	-0.0315848
		MudTank 05	0.157593	22.7356	5.01293	7.75581	8.04175	1.19213e-05	1.3235	0.220488	0.341131	0.353707	0.0582126	1.6042	4.76445e-06	6.69042e-06	1.44275e-05	2.58055e-06	3.9837e-05
		SA02 05	0.157738	23.0099	5.07344	7.84927	8.13864	1.892e-05	1.33934	0.22049	0.341126	0.353703	0.0582073	1.60417	3.65803e-06	5.7939e-06	1.25331e-05	2.80839e-06	4.43174e-05	0.00718905	-0.0210544	-0.0393444	-0.110451	-0.00934559
		MudTank 06	0.156233	22.6624	4.99679	7.73096	8.01628	1.68436e-05	1.31929	0.220488	0.341136	0.353726	0.0582148	1.60428	3.83455e-06	5.87029e-06	1.17006e-05	2.31149e-06	4.01141e-05
		SA02 06	0.158858	23.0194	5.07551	7.8525	8.1421	1.98375e-05	1.33992	0.220489	0.341126	0.353706	0.0582082	1.60419	4.33248e-06	7.43249e-06	1.47952e-05	2.64412e-06	4.88669e-05	-0.00184145	-0.0276886	-0.0462889	-0.126264	-0.0162903
		MudTank 07	0.158601	22.9053	5.05038	7.81377	8.10203	3.56905e-05	1.33346	0.22049	0.341134	0.35372	0.0582162	1.60424	4.13186e-06	7.00332e-06	1.23946e-05	2.70634e-06	4.00308e-05
		SA02 07	0.160971	23.2466	5.12555	7.93011	8.22263	1.77743e-05	1.35325	0.220486	0.34113	0.353713	0.0582129	1.60425	4.02223e-06	6.4433e-06	1.17105e-05	2.48601e-06	4.02015e-05	-0.0315837	-0.0189813	-0.0230028	-0.0567282	0.00699651
		MudTank 08	0.158753	22.912	5.05198	7.81614	8.10447	7.52193e-06	1.33384	0.220495	0.341138	0.353722	0.0582162	1.60422	4.28636e-06	6.78547e-06	1.3971e-05	2.68191e-06	4.41981e-05
		SA02 08	0.15814	22.9763	5.0661	7.83791	8.12695	1.37106e-05	1.33744	0.220492	0.34113	0.35371	0.0582097	1.60418	3.72058e-06	6.10868e-06	1.23171e-05	2.32394e-06	4.11135e-05	0.0197104	-0.00575846	0.00842507	-0.0496642	0.0384253
		MudTank 09	0.157956	22.8277	5.03307	7.78713	8.07398	2.49806e-05	1.32878	0.220481	0.341126	0.353692	0.058209	1.60419	3.71407e-06	5.431e-06	1.13209e-05	2.1522e-06	3.85031e-05
		SA02 09	0.156489	22.8786	5.04445	7.80434	8.09208	1.45204e-05	1.33166	0.220488	0.34112	0.353698	0.0582057	1.60416	3.37915e-06	5.99846e-06	1.20667e-05	2.39607e-06	4.42059e-05	0.0257335	-0.00529587	0.00388864	-0.0535414	0.0338888
		MudTank 10	0.161022	22.952	5.06055	7.82936	8.11813	2.57579e-05	1.336	0.220484	0.341119	0.3537	0.0582086	1.6042	3.99618e-06	6.03922e-06	1.17508e-05	2.35502e-06	3.80516e-05
		SA02 10	0.156177	22.9303	5.05583	7.82202	8.11031	1.67437e-05	1.3347	0.220486	0.341121	0.353694	0.0582069	1.60416	3.99413e-06	6.73955e-06	1.23556e-05	2.96965e-06	3.98159e-05	0.00403229	0.00412544	-0.00434844	-0.0270476	0.0256514
		MudTank 11	0.160454	22.9191	5.05338	7.81821	8.10632	1.52235e-05	1.33409	0.220487	0.341121	0.353691	0.0582083	1.60414	4.3291e-06	7.03905e-06	1.26617e-05	2.53e-06	3.88216e-05
		SA02 11	0.153733	22.8585	5.03993	7.79755	8.08494	2.39361e-05	1.33057	0.220484	0.341123	0.353696	0.0582091	1.60418	4.05646e-06	6.05342e-06	1.25244e-05	2.2863e-06	4.05586e-05	-0.0249185	-0.0160036	-0.0176778	-0.0265421	0.0123216
		MudTank 12	0.14969	22.8582	5.04004	7.79774	8.0852	6.63115e-06	1.33064	0.220492	0.341136	0.353712	0.0582131	1.6042	3.88131e-06	6.6735e-06	1.26034e-05	2.80046e-06	4.24607e-05
		SA02 12	0.155851	22.9211	5.05381	7.819	8.10717	1.15724e-05	1.33426	0.220487	0.341126	0.353699	0.0582109	1.60417	4.37282e-06	6.43287e-06	1.42969e-05	2.91762e-06	4.48677e-05	-0.00216944	-0.00100738	-0.00645911	0.00268231	0.0235407
		MudTank 13	0.158762	22.8835	5.04541	7.80593	8.09366	2.62803e-05	1.33201	0.220483	0.341117	0.35369	0.0582085	1.60417	3.65036e-06	6.14195e-06	1.18292e-05	1.9837e-06	4.08446e-05
		SA02 13	0.150774	22.766	5.01967	7.76612	8.05208	1.11852e-05	1.32519	0.22049	0.341128	0.353689	0.0582093	1.60411	3.958e-06	5.10186e-06	1.14198e-05	2.26653e-06	4.11407e-05	0.0178599	0.0110361	-0.0305431	-0.0281694	-0.000543974
		MudTank 14	0.158851	22.9394	5.05788	7.82533	8.11386	9.21599e-06	1.33538	0.220489	0.341131	0.353709	0.0582133	1.6042	3.66346e-06	6.28179e-06	1.22708e-05	2.16533e-06	3.98899e-05
		SA02 14	0.158502	22.9548	5.06108	7.83036	8.11867	8.76831e-06	1.33617	0.22048	0.341121	0.35368	0.0582088	1.60414	4.12628e-06	6.52284e-06	1.20479e-05	2.21427e-06	3.94147e-05	-0.0454334	-0.0205527	-0.0484249	-0.0318286	-0.0184263
		MudTank 15	0.158832	22.9788	5.06664	7.83866	8.12731	2.00516e-05	1.33755	0.220491	0.341125	0.353686	0.0582079	1.60408	3.76974e-06	5.92436e-06	1.1649e-05	2.19276e-06	3.78301e-05
		SA02 15	0.152708	22.9568	5.06156	7.83118	8.12	1.71447e-05	1.33642	0.220482	0.341126	0.353707	0.0582143	1.60425	3.22933e-06	5.33299e-06	1.02348e-05	2.08046e-06	3.48173e-05	-0.0308443	-0.00767948	0.0506619	0.11578	0.0806634
		MudTank 16	0.161053	22.9166	5.05278	7.81762	8.10546	1.22902e-05	1.33391	0.220485	0.341133	0.353693	0.0582073	1.60416	4.094e-06	6.56175e-06	1.17002e-05	2.27521e-06	3.32169e-05
		SA02 16	0.160863	23.372	5.15316	7.97255	8.26604	3.20328e-05	1.36035	0.220484	0.341115	0.353673	0.0582044	1.60407	3.69423e-06	7.02878e-06	1.25095e-05	2.49227e-06	4.16786e-05	0.00175316	-0.0213482	-0.0390354	-0.0343692	-0.00903655
		MudTank 17	0.161436	23.0442	5.08084	7.86066	8.15027	4.05993e-06	1.3413	0.220482	0.341112	0.35368	0.0582054	1.60412	4.60474e-06	7.35915e-06	1.34749e-05	2.37036e-06	4.61373e-05
		SA02 17	0.151357	22.7538	5.01693	7.76218	8.04823	2.08147e-05	1.32459	0.220488	0.341138	0.353709	0.0582141	1.60421	3.57813e-06	6.15471e-06	1.1863e-05	2.13628e-06	4.05008e-05	0.0283543	0.0617364	0.0688941	0.11846	0.0988962
		MudTank 18	0.160764	22.9077	5.05071	7.81431	8.10223	3.26421e-05	1.33343	0.22048	0.341121	0.35369	0.058209	1.60418	3.40999e-06	5.55811e-06	1.05197e-05	1.94816e-06	3.70379e-05
	9 (2021-03-27)	MudTank 01	0.161375	23.0273	5.07715	7.85506	8.14455	-3.44164e-06	1.34037	0.220484	0.341119	0.353691	0.0582076	1.60416	3.25415e-06	5.19625e-06	1.08653e-05	1.86503e-06	4.00728e-05
		SA02 01	0.158661	22.932	5.05616	7.82274	8.11109	2.52698e-05	1.33487	0.220484	0.341127	0.353701	0.0582096	1.6042	3.97517e-06	6.71116e-06	1.42659e-05	2.75495e-06	4.59921e-05	-0.000411709	0.0171477	0.0209081	0.0111055	0.0509088
		MudTank 02	0.161555	22.9901	5.06898	7.84245	8.13153	3.92546e-06	1.33826	0.220485	0.341123	0.353697	0.0582104	1.60417	3.56436e-06	5.79114e-06	1.11265e-05	1.99664e-06	3.59098e-05
		SA02 02	0.162276	23.2754	5.13179	7.9398	8.2322	1.90333e-05	1.3548	0.220481	0.341125	0.353687	0.0582073	1.60416	4.19496e-06	5.63508e-06	1.17352e-05	2.10185e-06	3.6442e-05	-0.0153948	0.00887873	-0.0272593	-0.0181573	0.00273991
		MudTank 03	0.162142	22.9726	5.0651	7.8364	8.12534	3.63752e-06	1.33715	0.220484	0.34112	0.353697	0.0582064	1.60418	3.37187e-06	5.16157e-06	1.03507e-05	2.03048e-06	3.7379e-05
		SA02 03	0.155935	22.9292	5.05569	7.82179	8.11004	2.45939e-05	1.33459	0.220491	0.341128	0.3537	0.0582048	1.60414	4.35021e-06	6.43393e-06	1.33794e-05	2.42687e-06	4.5302e-05	0.0285903	0.0333018	0.0317361	-0.0347432	0.0617371
		MudTank 04	0.161593	22.9283	5.05536	7.82116	8.10927	3.01237e-05	1.33459	0.220486	0.341114	0.353681	0.0582072	1.6041	4.1862e-06	7.10126e-06	1.21156e-05	2.51509e-06	3.73233e-05
		SA02 04	0.160682	23.1508	5.10435	7.89691	8.18788	1.6589e-05	1.34743	0.220483	0.341108	0.353676	0.0582024	1.6041	4.18163e-06	5.3542e-06	1.12855e-05	2.23118e-06	3.27821e-05	-0.0204897	-0.0310361	-0.0235503	-0.0687429	0.006449
		MudTank 05	0.16395	23.2402	5.12421	7.92776	8.21978	1.77742e-05	1.35271	0.220489	0.341122	0.353688	0.0582055	1.60411	3.91916e-06	5.79616e-06	1.14634e-05	1.86738e-06	3.624e-05
		SA02 05	0.163581	23.438	5.16754	7.99466	8.28884	1.32603e-05	1.36396	0.220477	0.341099	0.35365	0.0581947	1.60402	4.15196e-06	6.02135e-06	1.21781e-05	2.28328e-06	3.57582e-05	-0.0291841	-0.0662901	-0.095682	-0.182289	-0.0656848
		MudTank 06	0.161908	23.0198	5.07538	7.85252	8.14167	4.02249e-05	1.33987	0.220479	0.34112	0.353681	0.0582051	1.60415	4.3203e-06	6.06757e-06	1.36067e-05	2.29368e-06	4.39251e-05
		SA02 06	0.158604	23.0891	5.09078	7.87611	8.16612	1.55445e-05	1.34393	0.220484	0.341118	0.353678	0.058206	1.6041	4.5509e-06	5.90591e-06	1.21084e-05	2.33995e-06	3.34079e-05	-0.000167518	-0.00633813	-0.0107926	0.00698117	0.0192071
		MudTank 07	0.162545	23.0672	5.08606	7.86865	8.15845	1.43806e-05	1.34265	0.220489	0.341119	0.353682	0.058206	1.60408	4.13784e-06	5.79645e-06	1.29914e-05	2.46856e-06	3.8503e-05
		SA02 07	0.159326	23.1578	5.10596	7.89978	8.19075	3.06805e-05	1.34787	0.220485	0.341128	0.353693	0.0582037	1.60416	3.87062e-06	5.99353e-06	1.22619e-05	2.23161e-06	3.85503e-05	-0.00504165	0.0126332	0.00920261	-0.05475	0.0392029
		MudTank 08	0.163178	23.1347	5.1008	7.89187	8.18263	1.49291e-05	1.34661	0.220483	0.341128	0.353697	0.0582078	1.60419	3.81984e-06	5.68574e-06	1.14795e-05	2.4229e-06	3.78196e-05
		SA02 08	0.151023	22.9345	5.05671	7.82322	8.1115	1.1654e-05	1.33488	0.220484	0.341111	0.353681	0.058204	1.60411	4.26053e-06	6.7559e-06	1.35839e-05	2.68838e-06	4.13481e-05	0.0104931	-0.0324213	-0.0290502	-0.0514896	0.000948959
		MudTank 09	0.160995	22.9489	5.0598	7.82824	8.11671	1.49291e-05	1.33577	0.220481	0.341116	0.353686	0.0582062	1.60416	4.26584e-06	6.03342e-06	1.27759e-05	2.36763e-06	3.94456e-05
		SA02 09	0.153962	23.2401	5.12411	7.92753	8.21943	3.12105e-05	1.3526	0.220485	0.341114	0.353675	0.0582011	1.60407	4.62382e-06	6.16502e-06	1.2419e-05	2.46231e-06	3.6309e-05	0.0129818	-0.0075957	-0.0364555	-0.0549935	-0.00645656
		MudTank 10	0.162917	23.0218	5.07593	7.85314	8.14256	2.52822e-05	1.33993	0.220484	0.341117	0.353689	0.0582025	1.60415	3.9797e-06	7.08792e-06	1.22978e-05	2.34537e-06	3.87107e-05
		SA02 10	0.142839	22.9725	5.06501	7.83615	8.12484	3.81407e-05	1.33708	0.220482	0.34111	0.353678	0.0582035	1.60411	3.67635e-06	5.70901e-06	1.20726e-05	2.26524e-06	3.90598e-05	0.00207151	-0.0229827	-0.0165575	0.0193775	0.013442
		MudTank 11	0.162028	23.0228	5.07603	7.85353	8.14268	3.45843e-05	1.33998	0.220478	0.341119	0.353678	0.0582022	1.60414	4.36301e-06	5.58342e-06	1.19343e-05	2.23222e-06	3.68626e-05
		SA02 11	0.157255	23.0775	5.08811	7.87213	8.16218	4.15434e-05	1.34318	0.220479	0.341117	0.353686	0.0582032	1.60417	3.61941e-06	5.83501e-06	1.16948e-05	2.39001e-06	4.06074e-05	-0.0156277	-0.00527706	0.0187562	-0.00687752	0.0487568
		MudTank 12	0.162155	23.0733	5.08735	7.87071	8.16054	1.50429e-05	1.34298	0.220486	0.341118	0.353679	0.058205	1.60409	3.94709e-06	6.28309e-06	1.33921e-05	2.69942e-06	4.01987e-05
		SA02 12	0.159302	23.0182	5.07501	7.85188	8.14102	1.9321e-05	1.33971	0.220478	0.341117	0.353679	0.0582025	1.60414	4.42637e-06	7.31814e-06	1.49678e-05	3.0121e-06	4.59793e-05	-0.0302473	0.0101699	0.0130934	0.00279441	0.0430938
		MudTank 13	0.162234	23.0903	5.09104	7.87632	8.16631	1.87598e-05	1.34385	0.220484	0.341109	0.353669	0.0581997	1.60406	4.15641e-06	6.12582e-06	1.16482e-05	2.19651e-06	3.41424e-05
		SA02 13	0.156911	22.9193	5.05328	7.81829	8.10632	1.41108e-05	1.33401	0.220481	0.341122	0.35369	0.0582045	1.60417	4.17132e-06	6.86952e-06	1.46922e-05	2.83837e-06	5.10975e-05	-0.0151691	0.0398883	0.0665161	0.0757006	0.0965181
		MudTank 14	0.162341	23.1272	5.09919	7.88886	8.17922	2.82095e-05	1.34601	0.220485	0.341108	0.353663	0.0582005	1.60402	4.02346e-06	6.28357e-06	1.29157e-05	2.42905e-06	4.11861e-05
		SA02 14	0.159833	22.9401	5.0579	7.82508	8.11322	1.64025e-05	1.33517	0.220483	0.341109	0.35367	0.0582023	1.60407	3.83526e-06	5.55352e-06	1.08515e-05	2.02746e-06	3.70798e-05	-0.00298013	-0.003957	0.00678145	0.0138841	0.0367817
		MudTank 15	0.162984	23.2118	5.11779	7.91786	8.20938	1.95358e-05	1.35099	0.220482	0.341114	0.353672	0.0582026	1.60408	4.14403e-06	6.00811e-06	1.29191e-05	2.4774e-06	4.11222e-05
		SA02 15	0.159635	23.1443	5.10295	7.89499	8.186	1.86248e-06	1.34715	0.220484	0.341121	0.353694	0.0582066	1.60417	3.98866e-06	6.48256e-06	1.36331e-05	2.73339e-06	4.37894e-05	-0.0131159	-0.0017954	0.00793227	0.022572	0.0379325
		MudTank 16	0.16429	23.1869	5.11251	7.9097	8.20144	1.36975e-05	1.34966	0.220492	0.341129	0.353711	0.0582079	1.60419	3.79354e-06	6.52792e-06	1.33267e-05	2.40822e-06	4.30319e-05
		SA02 16	0.160246	23.0065	5.07257	7.84793	8.13708	1.35357e-05	1.33906	0.220485	0.341119	0.353687	0.0582035	1.60413	3.66409e-06	5.95743e-06	1.16001e-05	2.56749e-06	3.74695e-05	-0.0122646	-0.00140283	-0.0231027	-0.0408376	0.00689658
		MudTank 17	0.16307	23.0755	5.08776	7.87128	8.16134	1.13793e-05	1.34308	0.220483	0.341109	0.353679	0.0582038	1.60411	3.41865e-06	6.79489e-06	1.45968e-05	2.62419e-06	4.94612e-05
		SA02 17	0.159987	23.2451	5.12516	7.92921	8.22126	1.82432e-05	1.35289	0.220483	0.341113	0.353677	0.0582013	1.6041	3.85837e-06	5.27382e-06	1.08171e-05	1.91093e-06	3.63434e-05	0.0090333	0.00925898	0.00771783	-0.057677	0.0377181
		MudTank 18	0.162222	23.1116	5.09564	7.88362	8.17388	1.43737e-05	1.34522	0.22048	0.34111	0.353669	0.0582054	1.60409	4.56603e-06	6.86442e-06	1.38202e-05	2.58506e-06	4.23211e-05

## Sheet: SA02_Solution
SN-MC-ICP-MS Zr isotopic data for SA02 zircon
Sample	δ94ZrSRM3169	2SE	δ94ZrIPGP-Zr	2SE
SA02	-0.03	0.03	0.00299901	0.03
	-0.04	0.02	-0.00700132	0.02
	-0.05	0.03	-0.0170017	0.03
SA02_R1	-0.01	0.03	0.0229997	0.03
	0.02	0.03	0.0530007	0.03
	-0.02	0.03	0.0129993	0.03
SA02_R2	0	0.03	0.033	0.03
	0	0.03	0.033	0.03
	-0.02	0.03	0.0129993	0.03

## Sheet: SA02_Self Bracket
LA-MC-ICP-MS Zr isotopic data for SA02 zircon (Self Bracket)
Session	Sample	89Y	90Zr	91Zr	92Zr	94Zr	95Mo	96Zr	91/90	92/90	94/90	96/90	94/91	91/90(2se)	92/90(2se)	94/90(2se)	96/90(2se)	94/91(2se)	δ 91/90	δ 92/90	δ 94/90	δ 96/90
1 (2021-01-20)	SA02 01	0.130949	30.4268	6.70563	10.3702	10.7427	1.49796e-05	1.76579	0.220385	0.340824	0.353061	0.0580336	1.60202	5.94863e-06	8.06838e-06	1.56632e-05	2.86799e-06	5.8377e-05
	SA02 02	0.139575	30.9047	6.81072	10.5336	10.9123	1.19865e-05	1.79367	0.220377	0.340838	0.35309	0.058038	1.60221	6.96966e-06	9.44465e-06	1.72017e-05	3.29282e-06	5.45249e-05	-0.0283444	0.0224922	0.0542306	0.0532303
	SA02 03	0.146422	31.1256	6.85954	10.6088	10.99	1.56497e-05	1.80643	0.220382	0.340838	0.353081	0.0580361	1.60213	6.01832e-06	8.21115e-06	1.61514e-05	3.66076e-06	5.59553e-05	0.0111944	-0.00653889	-0.0216199	-0.0492579
	SA02 04	0.150639	31.245	6.88585	10.6496	11.0323	-2.17196e-06	1.81347	0.220382	0.340842	0.353088	0.05804	1.60216	6.38253e-06	7.04027e-06	1.43777e-05	2.70176e-06	4.87e-05	0.0111109	0.0117714	0.0310006	0.0608204
	SA02 05	0.152021	31.3757	6.91449	10.6941	11.078	1.20063e-05	1.82096	0.220377	0.340838	0.353072	0.0580368	1.60213	4.98058e-06	9.03549e-06	1.5443e-05	2.74195e-06	5.34733e-05	-0.0163399	0.00553401	-0.0304901	0.00646244
	SA02 06	0.154284	31.7602	6.99929	10.8249	11.2139	1.42469e-06	1.84316	0.220379	0.34083	0.353078	0.0580329	1.60214	5.39079e-06	8.36907e-06	1.78428e-05	3.41649e-06	5.46052e-05	0.0308661	-0.00361116	0.0498367	-0.0375165
	SA02 07	0.140844	28.9155	6.37206	9.85516	10.2087	-1.10318e-05	1.67807	0.220367	0.340825	0.353049	0.0580333	1.60209	6.24765e-06	9.20986e-06	1.6275e-05	3.42735e-06	4.51858e-05	-0.0519183	-0.0105555	-0.0783463	-0.0174113
	SA02 08	0.149131	30.788	6.78504	10.4934	10.8706	-9.35808e-06	1.78682	0.220379	0.340827	0.353075	0.0580358	1.60213	5.88835e-06	7.93058e-06	1.55989e-05	3.03666e-06	5.33935e-05	0.034252	0.000678736	0.0428136	0.0348696
	SA02 09	0.150786	29.5891	6.52071	10.0848	10.4471	1.72836e-05	1.71718	0.220375	0.340828	0.353071	0.0580341	1.60214	6.68733e-06	8.39138e-06	1.43786e-05	2.63834e-06	5.32618e-05	-0.00582175	0.0130922	0.0239634	0.00174861
	SA02 10	0.152692	29.8553	6.57936	10.1753	10.5405	6.32497e-05	1.73259	0.220374	0.340821	0.35305	0.0580323	1.60205	6.40866e-06	8.08272e-06	1.60044e-05	3.092e-06	5.47263e-05	-0.015055	-0.0245668	-0.057009	-0.0497387
	SA02 11	0.15132	29.3511	6.46839	10.0037	10.363	8.55484e-05	1.70344	0.220379	0.34083	0.353069	0.0580363	1.6021	5.49115e-06	7.77852e-06	1.39658e-05	2.73503e-06	4.89027e-05	0.0199501	0.0311798	0.0468758	0.0726181
	SA02 12	0.159463	30.8147	6.79084	10.5023	10.8794	2.10817e-05	1.78825	0.220376	0.340818	0.353055	0.0580318	1.60206	5.33022e-06	9.19216e-06	1.61209e-05	2.86146e-06	5.80642e-05	-0.00552159	-0.0394742	-0.0486128	-0.0667684
	SA02 13	0.163779	31.443	6.92928	10.7169	11.1019	1.55304e-05	1.82482	0.220375	0.340833	0.353076	0.0580351	1.60216	5.9736e-06	9.70668e-06	1.80442e-05	3.12099e-06	5.74818e-05	-0.0116335	0.0185025	0.0484726	0.0355154
	SA02 14	0.160601	30.7131	6.76856	10.4682	10.8438	1.79734e-05	1.78243	0.22038	0.340835	0.353062	0.0580343	1.60206	6.02118e-06	8.88526e-06	1.54218e-05	3.11859e-06	5.75705e-05	0.026804	0.0322142	0.000938646	0.0328769
	SA02 15	0.163566	30.9645	6.82376	10.5533	10.9321	1.57764e-05	1.79688	0.220372	0.340815	0.353047	0.0580296	1.60205	7.01401e-06	9.37302e-06	1.79824e-05	3.30152e-06	5.04629e-05	-0.0248478	-0.0412104	-0.0343808	-0.0715696
	SA02 16	0.166957	31.0831	6.84999	10.5939	10.9743	7.68652e-06	1.80388	0.220376	0.340824	0.353057	0.0580333	1.60207	6.89084e-06	1.03303e-05	2.32406e-05	3.14519e-06	7.1739e-05	-0.00500791	0.005308	-0.0105385	0.0349292
	SA02 17	0.167247	31.5869	6.96117	10.7658	11.1526	2.07255e-05	1.83309	0.220381	0.340829	0.353075	0.0580329	1.60211	5.63604e-06	8.66172e-06	1.75211e-05	2.87516e-06	5.68388e-05	0.0304792	0.0122462	0.0472114	0.0245835
	SA02 18	0.170233	31.0563	6.84402	10.5848	10.9648	1.81739e-05	1.80221	0.220373	0.340825	0.353059	0.0580296	1.60209	6.37341e-06	9.8694e-06	1.89198e-05	3.47672e-06	5.91829e-05	-0.022737	-0.00570695	-0.0362677	-0.0762129
	SA02 19	0.172879	31.1589	6.86669	10.6198	11.0014	1.62866e-05	1.80833	0.220376	0.340825	0.353068	0.0580352	1.60212	6.82951e-06	9.1108e-06	1.92031e-05	3.26879e-06	6.50921e-05	0.0107041	0.00888338	0.046219	0.0894304
	SA02 20	0.173133	30.9842	6.82812	10.5601	10.9389	1.95675e-05	1.79804	0.220373	0.34082	0.353045	0.0580304	1.60203	5.74285e-06	7.73536e-06	1.33194e-05	2.49552e-06	4.29394e-05	-0.0200761	-0.0318007	-0.0816632	-0.0847032
	SA02 21	0.175758	31.0906	6.85176	10.5968	10.9776	1.14916e-05	1.80437	0.22038	0.340836	0.35308	0.0580355	1.60214	6.53242e-06	8.2215e-06	1.68611e-05	3.01621e-06	5.68244e-05	0.00769212	0.027684	0.0423891	0.0174401
	SA02 22	0.181722	31.2835	6.89437	10.6625	11.0458	2.58498e-05	1.81566	0.220383	0.340833	0.353084	0.0580385	1.60214	5.35117e-06	9.01484e-06	1.53809e-05	2.81943e-06	4.95044e-05	0.00513267	-0.0104349	0.0170019	0.0229861
	SA02 23	0.189691	31.1907	6.87395	10.631	11.0128	3.68144e-05	1.81029	0.220383	0.340837	0.353077	0.0580389	1.6021	6.9272e-06	9.29565e-06	1.80105e-05	3.08823e-06	5.25585e-05	0.00935184	0.00902039	-0.0200371	0.00484227
	SA02 24	0.199502	31.5261	6.94775	10.7452	11.1315	7.30524e-06	1.82975	0.22038	0.340835	0.353084	0.0580387	1.60216	6.44981e-06	7.94027e-06	1.63351e-05	2.64462e-06	5.24133e-05	-0.00565375	-0.00238031	0.00895286	0.0147707
	SA02 25	0.197782	31.0396	6.84049	10.5794	10.9597	1.44785e-05	1.80145	0.220379	0.340835	0.353084	0.0580367	1.60217	5.49289e-06	9.47037e-06	1.60109e-05	2.73293e-06	5.15676e-05	0.0108439	0.0123812	0.0306515	0.00124245
	SA02 26	0.198904	31.1319	6.86065	10.6106	10.9916	7.91372e-06	1.80674	0.220373	0.340826	0.353063	0.0580347	1.60211	6.16305e-06	7.90043e-06	1.55767e-05	3.14039e-06	5.20703e-05	-0.0326602	-0.0214824	-0.0454909	-0.0388507
	SA02 27	0.196097	31.157	6.86645	10.6193	11.0008	5.93914e-06	1.80828	0.220382	0.340832	0.353074	0.0580371	1.6021	4.88655e-06	8.29701e-06	1.58247e-05	2.73414e-06	5.3852e-05	0.0339103	0.0119382	0.0315866	0.0600251
	SA02 28	0.191387	30.4443	6.70923	10.3764	10.7489	3.29365e-05	1.76678	0.220376	0.340829	0.353063	0.0580326	1.60209	6.75245e-06	7.58554e-06	1.43981e-05	2.62108e-06	4.79139e-05	-0.0231731	0.00838761	-0.00239872	-0.0796686
	SA02 29	0.189777	29.2429	6.44456	9.96665	10.3244	8.90835e-05	1.69719	0.22038	0.340821	0.353053	0.0580373	1.60202	5.51011e-06	6.89189e-06	1.46519e-05	2.64435e-06	4.48217e-05	0.0066181	-0.0423844	-0.081979	-0.0119636
	SA02 30	0.212355	31.4561	6.93233	10.7216	11.1073	3.40347e-05	1.82583	0.220381	0.340842	0.353101	0.0580434	1.60223	5.45004e-06	8.34093e-06	1.44265e-05	2.5813e-06	5.44748e-05	0.00549526	0.036101	0.0828917	0.0946068
	SA02 31	0.209892	31.0763	6.8486	10.592	10.9729	1.31385e-05	1.80364	0.220379	0.340839	0.353091	0.0580385	1.6022	5.99885e-06	8.86723e-06	1.53603e-05	3.09448e-06	4.46183e-05	0.000286059	0.013176	0.0116292	-0.0246184
	SA02 32	0.167879	31.0324	6.83889	10.5767	10.9568	3.70919e-06	1.80103	0.220378	0.340826	0.353072	0.0580365	1.60212	5.67337e-06	8.63482e-06	1.5913e-05	2.98418e-06	5.56979e-05	-0.00720671	-0.0247916	-0.0229918	0.000975789
	SA02 33	0.169667	30.934	6.81725	10.5433	10.922	2.18305e-05	1.79525	0.220379	0.34083	0.35307	0.0580344	1.6021	5.93669e-06	9.11901e-06	1.52831e-05	2.91469e-06	5.50002e-05	0.00517406	0.00911357	-0.00111245	0.00969788
	SA02 34	0.174327	31.4083	6.92175	10.7049	11.0894	2.3287e-06	1.82267	0.220379	0.340828	0.353069	0.0580312	1.6021	6.43476e-06	7.46143e-06	1.71771e-05	2.17437e-06	5.83012e-05	-0.000590857	-0.0153674	-0.016928	-0.0736051
	SA02 35	0.174392	30.9502	6.82077	10.549	10.928	9.82914e-06	1.79625	0.220379	0.340837	0.353079	0.0580365	1.60215	5.156e-06	7.70167e-06	1.5547e-05	2.94913e-06	5.80321e-05
2 (2021-01-21)	SA02 01	0.19	26.35	5.8	8.97	9.28	0	1.53	0.22026	0.340488	0.352329	0.057898	1.5996	7e-06	1e-05	1.8e-05	3e-06	6.9e-05
	SA02 02	0.19	27.41	6.04	9.33	9.66	0	1.59	0.220256	0.340487	0.352327	0.057892	1.59962	7e-06	1e-05	2e-05	3e-06	6.7e-05	-0.0295102	-0.00734237	-0.01	-0.07
	SA02 03	0.19	26.89	5.92	9.15	9.47	0	1.56	0.220265	0.340491	0.35233	0.057894	1.59957	7e-06	9e-06	2e-05	3e-06	6.7e-05	0.0408615	0.0264331	0.03	0.03
	SA02 04	0.19	26.65	5.87	9.07	9.39	0	1.54	0.220256	0.340477	0.352313	0.057892	1.59956	7e-06	8e-06	2e-05	3e-06	7.8e-05	-0.0249703	-0.020559	-0.03	0.01
	SA02 05	0.16	27.44	6.04	9.34	9.67	0	1.59	0.220258	0.340477	0.352315	0.057889	1.59956	6e-06	1e-05	1.9e-05	3e-06	6.5e-05	0.0113505	-0.00881109	-0.01	-0.03
	SA02 06	0.19	27.66	6.09	9.42	9.75	0	1.6	0.220255	0.340483	0.352326	0.05789	1.59963	7e-06	9e-06	1.9e-05	3e-06	6e-05	-0.00227009	0.0293709	0.07	0.09
	SA02 07	0.19	27.65	6.09	9.41	9.74	0	1.6	0.220253	0.340469	0.352291	0.057881	1.59949	5e-06	7e-06	1.5e-05	3e-06	5.5e-05	-0.00454021	-0.00734276	-0.06	-0.08
	SA02 08	0.19	27.83	6.13	9.47	9.8	0	1.61	0.220253	0.34046	0.3523	0.057881	1.59953	6e-06	1.1e-05	1.6e-05	3e-06	5.4e-05	0	-0.0146858	0.03	-0.02
	SA02 09	0.19	27.74	6.11	9.44	9.77	0	1.61	0.220253	0.340461	0.352291	0.057883	1.59949	5e-06	9e-06	2e-05	3e-06	6.5e-05	0.0136209	0.00587442	-0.02	0
	SA02 10	0.19	27.76	6.11	9.45	9.78	0	1.61	0.220247	0.340458	0.352295	0.057885	1.59955	7e-06	9e-06	1.5e-05	3e-06	5.4e-05	-0.0272414	-0.00881158	0.02	0.05
	SA02 11	0.19	28.09	6.19	9.56	9.9	0	1.63	0.220253	0.340461	0.352287	0.057881	1.59946	6e-06	9e-06	1.7e-05	3e-06	5.9e-05	0.0204315	0.0146862	0	-0.01
	SA02 12	0.19	27.61	6.08	9.4	9.73	0	1.6	0.22025	0.340454	0.352278	0.057878	1.59944	6e-06	8e-06	1.6e-05	3e-06	5.5e-05	-0.0204309	-0.0161546	-0.03	-0.05
	SA02 13	0.19	28.03	6.17	9.54	9.87	0	1.62	0.220256	0.340458	0.352289	0.057881	1.59945	6e-06	9e-06	1.8e-05	3e-06	6.2e-05	0.0227014	0.00440585	0.02	0.07
	SA02 14	0.19	28.08	6.18	9.56	9.89	0	1.63	0.220252	0.340459	0.352284	0.057876	1.59946	6e-06	8e-06	1.6e-05	3e-06	5.8e-05	0.00454027	0.0102803	0.01	-0.03
	SA02 15	0.19	27.69	6.1	9.43	9.75	0	1.6	0.220246	0.340453	0.352272	0.057875	1.59945	5e-06	8e-06	1.3e-05	3e-06	4.7e-05	-0.0204313	0	-0.01	0.01
	SA02 16	0.19	28.3	6.23	9.63	9.97	0	1.64	0.220249	0.340447	0.352269	0.057873	1.59941	6e-06	1e-05	1.7e-05	3e-06	5.9e-05	0.00454034	0.00146866	0.01	-0.01
	SA02 17	0.18	27.77	6.12	9.45	9.78	0	1.61	0.22025	0.34044	0.352261	0.057872	1.59937	7e-06	1e-05	1.7e-05	3e-06	6e-05	0.00908067	-0.00881205	-0.01	-0.03
	SA02 18	0.17	27.99	6.17	9.53	9.86	0	1.62	0.220247	0.340439	0.352262	0.057875	1.59939	6e-06	8e-06	1.4e-05	3e-06	5.4e-05	-0.00908063	-0.00587473	0	0.03
	SA02 19	0.19	28.13	6.2	9.58	9.91	0	1.63	0.220248	0.340442	0.352266	0.057874	1.59941	7e-06	9e-06	1.8e-05	3e-06	5.7e-05	-0.00227016	0	0	0
	SA02 20	0.18	28	6.17	9.53	9.86	0	1.62	0.22025	0.340445	0.352268	0.057873	1.5994	7e-06	8e-06	1.7e-05	3e-06	6.4e-05	0.00908067	0	-0.01	-0.03
	SA02 21	0.18	28.04	6.18	9.55	9.88	0	1.62	0.220248	0.340448	0.352276	0.057876	1.59945	7e-06	8e-06	1.8e-05	3e-06	5.5e-05	-0.0136208	0.0205616	0.04	0.11
	SA02 22	0.17	29.01	6.39	9.88	10.22	0	1.68	0.220252	0.340437	0.352258	0.057866	1.59934	7e-06	1e-05	1.9e-05	2e-06	5.6e-05	0.0136209	-0.0381848	-0.04	-0.13
	SA02 23	0.16	28.86	6.36	9.83	10.17	0	1.67	0.22025	0.340452	0.352266	0.057871	1.59939	6e-06	1e-05	1.7e-05	2e-06	5.7e-05	0.00908067	0.0469986	0.05	0.08
	SA02 24	0.14	28.08	6.18	9.56	9.89	0	1.62	0.220244	0.340435	0.352241	0.057867	1.59932	7e-06	9e-06	1.9e-05	3e-06	5.5e-05	-0.0249717	-0.0323106	-0.05	-0.05
	SA02 25	0.15	27.83	6.13	9.47	9.8	0	1.61	0.220249	0.34044	0.352254	0.057869	1.59934	6e-06	8e-06	1.7e-05	3e-06	5.8e-05	0.0227021	-0.0117494	0.02	0.01
	SA02 26	0.14	27.37	6.03	9.32	9.64	0	1.58	0.220244	0.340453	0.352255	0.05787	1.59939	8e-06	9e-06	1.8e-05	3e-06	6.1e-05	-0.0181613	0.0558111	0.02	0.04
	SA02 27	0.14	27.54	6.07	9.38	9.7	0	1.59	0.220247	0.340428	0.352244	0.057866	1.59932	6e-06	9e-06	1.8e-05	3e-06	6.4e-05	-0.00454034	-0.0514032	-0.03	-0.01
	SA02 28	0.14	28.13	6.2	9.58	9.91	0	1.63	0.220252	0.340438	0.352251	0.057863	1.59931	7e-06	1.1e-05	2.2e-05	3e-06	7.4e-05	0.0363234	0.0264372	0.04	0.01
	SA02 29	0.14	28.65	6.31	9.75	10.09	0	1.66	0.220241	0.34043	0.352229	0.057859	1.59929	6e-06	9e-06	1.9e-05	3e-06	6e-05	-0.0408627	-0.0293738	-0.07	-0.05
	SA02 30	0.12	28.89	6.36	9.83	10.18	0	1.67	0.220248	0.340442	0.352253	0.057861	1.59935	7e-06	1e-05	2e-05	3e-06	6.5e-05	0.0385943	0.0528752	0.08	0.05
	SA02 31	0.12	28.67	6.31	9.76	10.1	0	1.66	0.220238	0.340418	0.352222	0.057857	1.59928	6e-06	9e-06	1.7e-05	3e-06	5.5e-05	-0.0272425	-0.0308435	-0.03	-0.01
	SA02 32	0.14	28.83	6.35	9.81	10.15	0	1.67	0.22024	0.340415	0.352214	0.057854	1.59923	6e-06	9e-06	1.9e-05	3e-06	6.3e-05	-0.0136213	-0.0323125	-0.05	-0.1
	SA02 33	0.13	28.57	6.29	9.73	10.07	0	1.65	0.220248	0.340434	0.352244	0.057862	1.59931	6e-06	8e-06	1.7e-05	3e-06	5.7e-05
3 (2021-01-21)	SA02 01	0.194583	28.463	6.26829	9.68837	10.0231	1.9606e-05	1.64601	0.220224	0.340382	0.352138	0.057829	1.599	6.5288e-06	9.53392e-06	2.01923e-05	3.51221e-06	6.09706e-05
	SA02 02	0.20036	29.7414	6.5502	10.1239	10.4745	1.38399e-05	1.7201	0.220237	0.340397	0.352182	0.0578347	1.5991	6.9847e-06	9.18364e-06	1.96268e-05	3.03763e-06	6.72885e-05	0.0362035	0.0335039	0.08639	0.0853506
	SA02 03	0.188792	28.6792	6.31616	9.76213	10.0999	4.06159e-05	1.65855	0.220234	0.340389	0.352164	0.0578304	1.59904	7.00185e-06	8.1015e-06	1.84377e-05	3.09517e-06	6.02572e-05	0.000316803	-0.0164722	-0.0182486	-0.0340409
	SA02 04	0.19812	28.7852	6.33944	9.7983	10.1371	2.03421e-05	1.66467	0.220231	0.340392	0.352159	0.0578301	1.59904	6.32406e-06	9.17021e-06	1.80741e-05	2.85943e-06	5.62558e-05	-0.00343544	0.0198514	0.0109952	0.0150538
	SA02 05	0.199005	29.1083	6.41054	9.90798	10.2505	2.17754e-05	1.6833	0.22023	0.340382	0.352146	0.057828	1.599	5.78087e-06	1.04331e-05	2.11159e-05	3.59048e-06	7.13336e-05	-0.0103844	-0.0179032	-0.0189449	-0.0204586
	SA02 06	0.195517	28.6818	6.31669	9.76286	10.1004	2.11871e-05	1.65864	0.220233	0.340383	0.352147	0.0578283	1.59898	6.15102e-06	9.31941e-06	1.92995e-05	3.63343e-06	6.95983e-05	0.0185628	0.00479719	0.0148256	0.0284971
	SA02 07	0.192566	28.4375	6.26276	9.6797	10.0141	2.67854e-05	1.64444	0.220228	0.340382	0.352137	0.0578253	1.59897	6.98717e-06	9.34369e-06	2.14756e-05	3.34249e-06	7.14495e-05	-0.0115536	0.00402179	0.00254376	-0.0396304
	SA02 08	0.193777	28.2991	6.23228	9.63244	9.96499	2.0899e-05	1.63647	0.220228	0.340378	0.352126	0.0578269	1.59892	6.86573e-06	9.02962e-06	1.7943e-05	3.24779e-06	5.45271e-05	-0.00279083	-0.0162658	-0.0532399	-0.00266025
	SA02 09	0.200458	29.4184	6.4788	10.0136	10.3599	1.36323e-05	1.70124	0.220229	0.340385	0.352152	0.0578288	1.59903	6.11708e-06	8.05336e-06	1.90194e-05	2.97196e-06	6.36886e-05	-0.013149	0.00463591	0.0455956	0.0275594
	SA02 10	0.185425	28.399	6.25451	9.66675	10.0007	9.86054e-05	1.64226	0.220236	0.340389	0.352146	0.0578276	1.59895	6.95142e-06	9.31138e-06	1.86648e-05	3.30337e-06	6.15743e-05	0.0328741	0.0367996	0.0133759	0.0622304
	SA02 11	0.200454	29.424	6.48003	10.015	10.3612	1.24728e-05	1.70129	0.220228	0.340367	0.35213	0.0578191	1.59893	6.18908e-06	9.5414e-06	1.94489e-05	3.2202e-06	6.3523e-05	-0.0178154	-0.0414288	-0.0164437	-0.0938787
	SA02 12	0.20114	29.4057	6.47602	10.009	10.3547	2.5385e-05	1.70031	0.220229	0.340374	0.352126	0.0578215	1.59891	7.07932e-06	9.47179e-06	1.78927e-05	2.97366e-06	5.35594e-05	-0.00695081	0.0195971	0.0109656	0.0415949
	SA02 13	0.19816	29.0909	6.40678	9.90167	10.2435	3.09246e-05	1.68203	0.220232	0.340368	0.352114	0.057819	1.59883	6.42204e-06	1.00554e-05	2.05569e-05	3.47907e-06	6.44969e-05	0.0241907	0.000680012	-0.00748673	-0.00826784
	SA02 14	0.198076	29.1602	6.42184	9.92505	10.2677	2.23785e-05	1.68599	0.220225	0.340361	0.352108	0.0578176	1.59886	5.5015e-06	8.74316e-06	1.74215e-05	3.23824e-06	6.00732e-05	-0.0226743	-0.0137506	-0.0176389	-0.00904565
	SA02 15	0.201267	29.5387	6.50527	10.0539	10.4011	7.3702e-06	1.70786	0.220228	0.340363	0.352114	0.0578171	1.59886	6.96788e-06	9.212e-06	1.61859e-05	2.74759e-06	4.93623e-05	0.000311174	-0.0274775	-0.0515321	-0.0840091
	SA02 16	0.20902	30.5495	6.72796	10.3986	10.7584	3.49899e-05	1.7666	0.22023	0.340384	0.352156	0.0578264	1.59904	7.26553e-06	1.12249e-05	2.29526e-05	4.08995e-06	7.20189e-05	0.0151312	0.0662482	0.13014	0.164306
	SA02 17	0.197116	29.0737	6.40281	9.89559	10.2372	1.87758e-05	1.68096	0.220226	0.340361	0.352107	0.0578167	1.59884	5.75744e-06	6.98852e-06	1.59769e-05	3.19817e-06	6.37398e-05	-0.0207883	-0.0491053	-0.102257	-0.108162
	SA02 18	0.195906	29.2221	6.43566	9.94641	10.2902	2.13213e-05	1.68963	0.220231	0.34037	0.35213	0.0578195	1.59891	7.02964e-06	1.15685e-05	2.22632e-05	3.70576e-06	6.60116e-05	0.019414	0.00356747	0.0278498	0.0210195
	SA02 19	0.199337	29.3629	6.46658	9.99452	10.3398	1.6277e-05	1.69778	0.220228	0.340377	0.352133	0.0578198	1.59895	6.50868e-06	8.91207e-06	1.82306e-05	3.75743e-06	5.84783e-05	-0.00611131	0.0208521	0.00985075	-0.0203394
	SA02 20	0.200618	29.4015	6.47506	10.0075	10.3533	2.65905e-05	1.70009	0.220227	0.34037	0.352129	0.0578226	1.59894	7.67868e-06	1.13309e-05	2.36699e-05	3.3342e-06	7.26956e-05	-0.00684001	-0.0161003	0.0138793	0.0627063
	SA02 21	0.196717	28.9459	6.37476	9.85246	10.1924	1.00214e-05	1.67361	0.220229	0.340374	0.352115	0.057818	1.59886	5.83444e-06	9.70695e-06	2.00061e-05	3.31914e-06	7.03263e-05	0.0126696	-0.00196777	-0.036918	-0.0360215
	SA02 22	0.203772	29.6279	6.52488	10.0848	10.4329	2.57802e-05	1.71302	0.220226	0.340379	0.352128	0.0578177	1.59894	7.40253e-06	9.10146e-06	1.63279e-05	2.62738e-06	4.9501e-05	-0.0122531	0.0247025	0.0389688	0.0193793
	SA02 23	0.200687	29.4852	6.49352	10.0359	10.3823	1.52526e-05	1.7047	0.220228	0.340367	0.352112	0.057815	1.59885	6.62791e-06	8.69781e-06	1.80436e-05	2.69499e-06	5.28987e-05	-0.00132226	-0.0206694	-0.038689	-0.0623617
	SA02 24	0.201991	29.6656	6.5333	10.0973	10.4461	1.94591e-05	1.71527	0.220231	0.34037	0.352125	0.0578196	1.59889	5.53425e-06	9.23925e-06	1.58243e-05	2.67364e-06	5.81103e-05	0.00957821	0.00623679	0.00881287	0.0516874
	SA02 25	0.202196	29.8284	6.56912	10.1527	10.5036	8.38791e-06	1.72464	0.220229	0.340368	0.352131	0.0578183	1.59893	6.33369e-06	9.16578e-06	1.78182e-05	3.48365e-06	6.28058e-05	0.0129103	0.00394765	0.0317552	0.00320505
	SA02 26	0.196662	29.4094	6.4766	10.0099	10.3555	1.5903e-05	1.70036	0.220222	0.340364	0.352114	0.0578165	1.59891	5.23262e-06	7.80372e-06	1.52071e-05	2.86493e-06	5.44178e-05	-0.0221604	-0.0117247	-0.0136198	0.00235421
	SA02 27	0.20124	29.6677	6.5336	10.098	10.4464	1.62709e-05	1.71524	0.220224	0.340367	0.352107	0.0578145	1.59886	6.91879e-06	8.32445e-06	1.7494e-05	3.1668e-06	5.28047e-05	-0.0125173	0.0117186	-0.00484175	-0.0468554
	SA02 28	0.20016	29.3365	6.46087	9.98509	10.3296	1.57612e-05	1.69619	0.220232	0.340363	0.352104	0.0578179	1.59878	6.41306e-06	9.92831e-06	1.86621e-05	3.658e-06	6.38477e-05	0.0246539	-0.0113753	-0.024547	0.0355938
	SA02 29	0.198214	29.4647	6.48901	10.0288	10.3752	5.03997e-06	1.70358	0.22023	0.340366	0.352118	0.0578172	1.59887	5.89994e-06	8.9191e-06	1.68921e-05	2.97823e-06	6.28437e-05	0.00859566	-0.00563515	0.0295276	0.00456426
	SA02 30	0.202839	29.6231	6.52374	10.083	10.4308	1.73219e-05	1.71272	0.220223	0.340373	0.352111	0.0578159	1.59888	7.38244e-06	1.02067e-05	2.4453e-05	3.71861e-06	7.94945e-05	-0.00962698	0.030887	0.0153903	0.00609753
	SA02 31	0.188223	29.5321	6.5036	10.0516	10.3982	1.13147e-05	1.70739	0.220221	0.340359	0.352093	0.057814	1.59882	6.76482e-06	8.15838e-06	1.72425e-05	2.69114e-06	6.29108e-05	-0.0177795	-0.0262863	-0.0408937	-0.0254856
	SA02 32	0.199394	29.118	6.41257	9.91077	10.2527	-1.04129e-07	1.68349	0.220226	0.340363	0.352104	0.057815	1.59883	6.77195e-06	1.07284e-05	1.92421e-05	3.67481e-06	6.71862e-05	0.0200667	0.0237622	0.0449893	0.0386349
	SA02 33	0.193453	28.3813	6.25023	9.65966	9.99272	8.31343e-06	1.64078	0.220223	0.340351	0.352083	0.0578115	1.59876	5.34267e-06	8.2226e-06	1.43176e-05	2.91908e-06	5.40811e-05	-0.0142438	-0.0247011	-0.033807	-0.0111992
	SA02 34	0.199241	29.4813	6.49258	10.0342	10.3801	7.53702e-06	1.70432	0.220226	0.340355	0.352087	0.0578093	1.59875	6.20748e-06	9.26734e-06	1.87528e-05	3.33189e-06	5.87289e-05	0.00365481	0.000976088	-0.0134926	-0.0232076
	SA02 35	0.2013	30.0211	6.61149	10.218	10.5706	1.59694e-05	1.73554	0.220227	0.340359	0.352099	0.0578098	1.5988	7.79791e-06	1.06804e-05	2.0951e-05	3.69064e-06	6.38704e-05
4 (2021-01-21)	SA02 01	0.2	29.09	6.41	9.9	10.24	0	1.68	0.220217	0.340342	0.352051	0.057801	1.59865	7e-06	9e-06	1.9e-05	3e-06	5.4e-05
	SA02 02	0.2	29.42	6.48	10.01	10.36	0	1.7	0.220214	0.340338	0.35205	0.057803	1.59867	7e-06	1e-05	2.1e-05	4e-06	6.9e-05	-0.00454102	0.0132223	0.0198839	0.0865082
	SA02 03	0.2	29.39	6.47	10	10.35	0	1.7	0.220213	0.340325	0.352035	0.057795	1.59861	6e-06	1.1e-05	2.2e-05	4e-06	7.7e-05	0.00681163	-0.0308519	-0.0184637	-0.0778553
	SA02 04	0.19	29.04	6.39	9.88	10.22	0	1.68	0.220209	0.340333	0.352033	0.057796	1.59863	7e-06	9e-06	2e-05	4e-06	6.8e-05	-0.0249756	0.0176301	-0.00426095	0.00865119
	SA02 05	0.19	28.99	6.38	9.87	10.2	0	1.68	0.220216	0.340329	0.352034	0.057796	1.59858	6e-06	1e-05	2e-05	4e-06	6.6e-05	0.0204349	-0.00881492	2.22045e-13	0
	SA02 06	0.19	29.08	6.4	9.9	10.24	0	1.68	0.220214	0.340331	0.352035	0.057796	1.59861	7e-06	1.1e-05	2.5e-05	5e-06	8.6e-05	-0.0113525	0.00440749	0.0184644	0.00865119
	SA02 07	0.19	28.85	6.35	9.82	10.16	0	1.67	0.220217	0.34033	0.352023	0.057795	1.59853	6e-06	9e-06	2e-05	4e-06	7.8e-05	0.00908203	-0.0146914	-0.0525506	-0.0259531
	SA02 08	0.2	29.03	6.39	9.88	10.22	0	1.68	0.220216	0.340339	0.352048	0.057797	1.59865	6e-06	9e-06	2e-05	4e-06	7.3e-05	0.00908207	0.0293833	0.0553932	0.0346051
	SA02 09	0.18	29.43	6.48	10.02	10.36	0	1.7	0.220211	0.340328	0.352034	0.057795	1.59862	8e-06	1e-05	2.1e-05	4e-06	6.6e-05	-0.0136231	-0.0337898	-0.0511288	-0.0432545
	SA02 10	0.2	29.47	6.49	10.03	10.38	0	1.7	0.220212	0.34034	0.352056	0.057798	1.59871	8e-06	1.2e-05	2.5e-05	5e-06	7.4e-05	0.00227054	0.0293832	0.0497105	0.0346045
	SA02 11	0.2	29.43	6.48	10.02	10.36	0	1.7	0.220212	0.340332	0.352043	0.057797	1.59866	7e-06	1.1e-05	2.1e-05	4e-06	6.8e-05	-0.00454106	-0.0029383	0.0156233	0.0432567
	SA02 12	0.19	29.26	6.44	9.96	10.3	0	1.69	0.220214	0.340326	0.352019	0.057791	1.59853	8e-06	1.1e-05	2.5e-05	4e-06	7.3e-05	0.0136233	-0.00734584	-0.0269865	-0.0519085
	SA02 13	0.19	29.05	6.4	9.89	10.23	0	1.68	0.22021	0.340325	0.352014	0.057791	1.59854	6e-06	1e-05	2.1e-05	4e-06	7.1e-05	-0.027246	0.00146919	-0.0227259	-0.0173034
	SA02 14	0.19	29.21	6.43	9.94	10.28	0	1.69	0.220218	0.340323	0.352025	0.057793	1.59853	6e-06	1e-05	2.1e-05	3e-06	7.6e-05	0.0249759	-0.0220374	-0.0198846	-0.00865149
	SA02 15	0.2	29.72	6.55	10.12	10.46	0	1.72	0.220215	0.340336	0.35205	0.057796	1.59867	7e-06	1.1e-05	2e-05	4e-06	6.8e-05	-0.0022705	0.0367298	0.0724381	0.0605615
	SA02 16	0.19	29.27	6.45	9.96	10.31	0	1.69	0.220213	0.340324	0.352024	0.057792	1.59857	6e-06	9e-06	1.9e-05	3e-06	6.7e-05	-0.00227052	-0.0190991	-0.0284063	-0.0259545
	SA02 17	0.2	29.35	6.46	9.99	10.33	0	1.7	0.220212	0.340325	0.352018	0.057791	1.59854	7e-06	1e-05	2e-05	4e-06	6.4e-05	-0.00227053	0.0132228	0.00994277	0
	SA02 18	0.2	29.26	6.44	9.96	10.3	0	1.69	0.220212	0.340317	0.352005	0.05779	1.59848	8e-06	1e-05	2.2e-05	4e-06	7.2e-05	-0.00227053	0	-0.0241468	0.0259567
	SA02 19	0.19	29.18	6.43	9.93	10.27	0	1.69	0.220213	0.340309	0.352009	0.057786	1.59849	7e-06	1.2e-05	2.1e-05	4e-06	7e-05	0.0090822	-0.0146923	0.0369322	-0.0259572
	SA02 20	0.19	29	6.39	9.87	10.21	0	1.68	0.22021	0.340311	0.351987	0.057785	1.59842	6e-06	1e-05	2e-05	3e-06	7.4e-05	-0.00908216	0.00587701	-0.0426134	-0.0173052
	SA02 21	0.19	28.91	6.37	9.84	10.18	0	1.67	0.220211	0.340309	0.351995	0.057786	1.59845	7e-06	1e-05	2.1e-05	3e-06	7.1e-05	0.00908228	-0.0235075	-0.0326699	-0.051913
	SA02 22	0.2	29.21	6.43	9.94	10.28	0	1.69	0.220208	0.340323	0.352026	0.057793	1.5986	6e-06	1.1e-05	2.1e-05	4e-06	7.1e-05	-0.0113528	0.0146921	0.0468737	0.0519121
	SA02 23	0.14	29.16	6.42	9.93	10.27	0	1.69	0.22021	0.340327	0.352024	0.057794	1.59858	6e-06	8e-06	1.8e-05	3e-06	6.3e-05	-0.00681163	0.00881513	-0.00142036	0.043259
	SA02 24	0.2	29.25	6.44	9.95	10.3	0	1.69	0.220215	0.340325	0.352023	0.05779	1.59855	6e-06	9e-06	1.8e-05	3e-06	5.6e-05	0.0181644	0.0132228	0.0241467	2.22045e-13
	SA02 25	0.19	28.99	6.38	9.87	10.2	0	1.68	0.220212	0.340314	0.352005	0.057786	1.59849	7e-06	1e-05	1.9e-05	4e-06	6.2e-05	-0.0113526	-0.0308529	-0.0525533	-0.0692161
	SA02 26	0.2	29.8	6.56	10.14	10.49	0	1.72	0.220214	0.340324	0.352024	0.05779	1.59856	7e-06	1e-05	2.2e-05	5e-06	7.8e-05	0.00227052	0.0117536	0.018465	0.0173043
	SA02 27	0.19	29.15	6.42	9.92	10.26	0	1.68	0.220215	0.340326	0.35203	0.057792	1.59857	6e-06	1e-05	2e-05	4e-06	7e-05	0.0249762	0.0176305	0.0497141	0.0605657
	SA02 28	0.19	28.94	6.37	9.85	10.19	0	1.67	0.220205	0.340316	0.352001	0.057787	1.59852	7e-06	1.1e-05	2.2e-05	4e-06	7.7e-05	-0.0385989	-0.0161612	-0.0539742	-0.0346087
	SA02 29	0.2	29.64	6.53	10.09	10.43	0	1.71	0.220212	0.340317	0.35201	0.057786	1.5985	7e-06	1e-05	2.2e-05	4e-06	7.2e-05	0.0181646	-0.0117536	-0.00852241	-0.0346093
	SA02 30	0.2	29.85	6.57	10.16	10.51	0	1.73	0.220211	0.340326	0.352025	0.057789	1.59858	6e-06	1e-05	2.2e-05	4e-06	6.9e-05	0.00227055	0.0352616	0.0426124	0.0346099
	SA02 31	0.19	30.06	6.62	10.23	10.58	0	1.74	0.220209	0.340311	0.35201	0.057788	1.59853	7e-06	1.1e-05	2.1e-05	4e-06	6.5e-05	-0.00227057	-0.0249765	-0.0198854	0
	SA02 32	0.2	29.91	6.59	10.18	10.53	0	1.73	0.220208	0.340313	0.352009	0.057787	1.59853	6e-06	9e-06	1.9e-05	3e-06	6.6e-05	-0.0113528	-0.00587691	-0.00710204	-0.00865239
	SA02 33	0.19	29.69	6.54	10.11	10.45	0	1.72	0.220212	0.340319	0.352013	0.057787	1.59852	6e-06	1e-05	2e-05	3e-06	6.9e-05	0.0045411	0.00587687	-0.0014204	0
	SA02 34	0.19	29.97	6.6	10.2	10.55	0	1.73	0.220214	0.340321	0.352018	0.057787	1.59853	7e-06	1.1e-05	2.2e-05	4e-06	7.5e-05	0.0158939	0.0176307	0.0298289	-0.00865239
	SA02 35	0.18	29.55	6.51	10.06	10.4	0	1.71	0.220209	0.340311	0.352002	0.057788	1.59849	6e-06	9e-06	1.8e-05	3e-06	6.2e-05
5 (2021-01-21)	SA02 01	0.170428	27.9858	6.16269	9.52415	9.85125	1.84807e-05	1.61734	0.220206	0.340319	0.352004	0.057791	1.59852	6.73798e-06	1.00241e-05	2.02668e-05	3.53554e-06	6.19206e-05
	SA02 02	0.151177	28.1469	6.19816	9.57852	9.90723	1.11342e-05	1.62633	0.220206	0.340302	0.351978	0.0577795	1.5984	7.60518e-06	1.07562e-05	2.17128e-05	3.49022e-06	5.91661e-05	0.0099453	-0.0194032	-0.0235478	-0.115933
	SA02 03	0.148012	28.4039	6.25461	9.66589	9.99742	2.45417e-05	1.64124	0.220201	0.340299	0.351968	0.0577815	1.59839	6.83579e-06	1.04763e-05	1.95477e-05	3.58753e-06	6.5346e-05	-0.0256378	-0.0150215	-0.0313116	0.0119859
	SA02 04	0.158315	28.5322	6.28305	9.70979	10.043	2.54181e-06	1.6487	0.220208	0.340306	0.351981	0.057782	1.5984	6.24785e-06	1.08713e-05	2.36047e-05	4.83108e-06	8.51083e-05	0.0209674	0.0214457	0.0295396	0.021785
	SA02 05	0.147796	28.1981	6.20942	9.59589	9.9252	2.01178e-06	1.62932	0.220205	0.340299	0.351973	0.05778	1.59838	6.68332e-06	1.13397e-05	2.48195e-05	4.49153e-06	8.18182e-05	-0.000796543	-0.0170674	-0.00391264	-0.0154375
	SA02 06	0.154781	28.3958	6.25289	9.66327	9.99461	2.47374e-06	1.64074	0.220203	0.340303	0.351967	0.0577798	1.59838	6.81122e-06	1.0707e-05	2.11488e-05	3.86165e-06	6.70767e-05	-0.00968088	-0.00736245	-0.0399153	-0.0373368
	SA02 07	0.153495	28.4915	6.274	9.69609	10.0289	2.12274e-05	1.64639	0.220205	0.340312	0.35199	0.057784	1.59846	6.25009e-06	1.11383e-05	2.09921e-05	3.83519e-06	7.41533e-05	0.00519277	0.0261574	0.0453386	0.0437733
	SA02 08	0.175539	28.5773	6.2929	9.72504	10.0588	2.73473e-06	1.65131	0.220205	0.340304	0.351981	0.057783	1.59842	7.33037e-06	1.01374e-05	2.19078e-05	3.70458e-06	6.92685e-05	-0.00273429	-0.0118418	-0.000728557	0.0388698
	SA02 09	0.162115	28.672	6.31376	9.75724	10.0919	3.40543e-06	1.65662	0.220206	0.340303	0.351972	0.0577776	1.59838	6.80541e-06	1.013e-05	1.91797e-05	3.65296e-06	6.51469e-05	0.0131045	0.00630193	-0.00914186	-0.0629633
	SA02 10	0.166563	28.3989	6.2535	9.66418	9.99576	2.0088e-05	1.64091	0.220201	0.340298	0.35197	0.0577794	1.5984	6.7889e-06	1.08491e-05	2.28801e-05	3.82142e-06	7.3968e-05	-0.0185332	-0.00460641	0.0163536	0.0300339
	SA02 11	0.158862	28.4033	6.25454	9.6656	9.9969	1.53801e-05	1.64111	0.220204	0.340296	0.351956	0.0577778	1.59832	6.97996e-06	1.04506e-05	2.39571e-05	4.17684e-06	7.97214e-05	0.000944761	-0.00964199	-0.0407698	-0.0353301
	SA02 12	0.155956	28.1273	6.19387	9.57183	9.90019	7.58435e-06	1.62522	0.220207	0.340301	0.351971	0.0577803	1.59836	7.07516e-06	1.01638e-05	2.27635e-05	3.519e-06	7.12264e-05	0.0312472	0.0242716	0.0373618	0.0349244
	SA02 13	0.156486	28.5204	6.28012	9.70526	10.0382	2.74481e-05	1.64789	0.220196	0.340289	0.351959	0.0577787	1.59839	7.69738e-06	9.98296e-06	2.14624e-05	3.34185e-06	6.86864e-05	-0.0447932	-0.0370862	-0.0187981	-0.0249208
	SA02 14	0.153379	28.1856	6.20666	9.59173	9.92047	6.74727e-06	1.6286	0.220205	0.340303	0.351961	0.05778	1.59833	7.69746e-06	1.14445e-05	2.36173e-05	4.24509e-06	7.91557e-05	0.0131009	0.0102779	-0.033058	-0.000262856
	SA02 15	0.153244	28.5131	6.27883	9.70331	10.0363	1.15564e-05	1.64753	0.220208	0.340309	0.351986	0.0577813	1.59843	6.07763e-06	9.24495e-06	1.5746e-05	3.04896e-06	5.01642e-05	0.01093	0.00956013	0.0561185	0.0171899
	SA02 16	0.174025	28.2258	6.21554	9.60557	9.93487	1.09205e-05	1.63094	0.220206	0.340309	0.351972	0.0577807	1.59837	7.60687e-06	1.07716e-05	2.16454e-05	3.84862e-06	6.31763e-05	0.00477596	0.0228244	-0.0132857	0.020585
	SA02 17	0.174703	28.5036	6.27656	9.69962	10.0324	1.1442e-05	1.64689	0.220202	0.340294	0.351967	0.0577776	1.59838	6.54735e-06	9.02869e-06	1.91406e-05	3.71423e-06	6.83915e-05	-0.0116381	-0.0332856	-0.0162792	-0.0279485
	SA02 18	0.165666	29.2765	6.44683	9.96291	10.3047	1.58827e-05	1.69156	0.220204	0.340301	0.351973	0.0577778	1.5984	6.67882e-06	1.18701e-05	2.36357e-05	4.01206e-06	7.92174e-05	0.0111075	0.0117271	0.0112455	0.00396999
	SA02 19	0.163706	29.3249	6.4574	9.97936	10.3217	1.24809e-05	1.69434	0.2202	0.3403	0.351972	0.0577776	1.59842	5.91964e-06	9.92189e-06	1.77413e-05	2.85891e-06	5.72664e-05	-0.00160431	0.006283	0.0145194	0.0102466
	SA02 20	0.156023	28.2041	6.21049	9.59781	9.92691	1.17562e-05	1.62956	0.220197	0.340295	0.35196	0.0577761	1.59838	7.15147e-06	1.24888e-05	2.25347e-05	3.94665e-06	7.7201e-05	-0.0370567	-0.0383268	-0.0462275	-0.0555344
	SA02 21	0.155073	28.2955	6.23099	9.62947	9.95968	1.29822e-05	1.63498	0.220211	0.340316	0.351981	0.0577811	1.59838	5.9845e-06	1.01832e-05	2.24947e-05	4.03987e-06	8.39997e-05	0.0542518	0.029425	0.0118738	0.0153959
	SA02 22	0.174798	28.4039	6.25456	9.66637	9.99811	5.58184e-06	1.64131	0.2202	0.340317	0.351993	0.0577843	1.59851	6.55671e-06	9.67983e-06	1.93051e-05	3.04988e-06	6.42314e-05	-0.0485664	-0.00611823	-0.013296	-0.0237685
	SA02 23	0.179697	28.9494	6.375	9.85218	10.1907	1.21848e-05	1.67301	0.220211	0.340322	0.352015	0.0577902	1.59853	6.67246e-06	9.78649e-06	1.89672e-05	3.27136e-06	6.51032e-05	0.0305808	0.0338603	0.0879602	0.138063
	SA02 24	0.166118	28.277	6.22688	9.62286	9.95295	1.28886e-05	1.63388	0.220209	0.340304	0.351975	0.0577802	1.59837	7.28324e-06	1.06228e-05	2.01467e-05	4.43861e-06	5.58915e-05	0.00414056	-0.0243512	-0.068236	-0.0489777
	SA02 25	0.162483	29.0887	6.4055	9.89906	10.239	6.1643e-06	1.68067	0.220204	0.340303	0.351983	0.0577759	1.59844	6.39519e-06	1.15252e-05	2.52216e-05	4.75701e-06	8.57018e-05	-0.000602107	0.0102942	0.047291	-0.0109732
	SA02 26	0.159203	28.7473	6.33019	9.78263	10.118	1.0732e-05	1.66083	0.2202	0.340294	0.351957	0.0577728	1.59835	7.27132e-06	1.13408e-05	2.25936e-05	4.16865e-06	7.48737e-05	-0.00440529	-0.00707926	-0.0339225	-0.0495073
	SA02 27	0.161467	28.2682	6.22465	9.61949	9.94933	3.27797e-05	1.63322	0.220198	0.340291	0.351956	0.0577754	1.59836	7.26061e-06	1.07664e-05	2.20691e-05	3.89027e-06	6.93853e-05	0.000929868	-0.00942776	0.0049637	0.0483156
	SA02 28	0.159355	28.4929	6.27405	9.69604	10.0283	-5.03353e-06	1.64613	0.220195	0.340294	0.351951	0.0577725	1.59836	7.83004e-06	1.07795e-05	2.2802e-05	3.7272e-06	7.3596e-05	-0.0205911	-0.00239213	-0.0223095	-0.0460223
	SA02 29	0.157759	28.7118	6.32243	9.77064	10.1056	5.75654e-06	1.65884	0.220202	0.340298	0.351962	0.0577748	1.59836	6.64819e-06	1.10153e-05	2.18093e-05	3.48853e-06	7.56084e-05	0.021389	0.0215943	0.0424288	0.0666147
	SA02 30	0.154281	28.4336	6.26108	9.67567	10.0072	1.51593e-05	1.64263	0.220199	0.340288	0.351943	0.0577695	1.59829	6.02015e-06	1.02139e-05	2.38118e-05	4.42338e-06	8.80124e-05	-0.012028	-0.0114981	-0.0302518	-0.0504096
	SA02 31	0.136809	28.7801	6.33746	9.79353	10.1292	1.1663e-05	1.66266	0.220201	0.340285	0.351945	0.05777	1.59829	6.18423e-06	1.05875e-05	2.22282e-05	4.18855e-06	7.8086e-05	0.00603635	-0.0199544	-0.00943808	-0.0424057
	SA02 32	0.152997	28.4213	6.25845	9.67178	10.0032	7.97917e-06	1.64209	0.220201	0.340297	0.351953	0.0577754	1.59833	7.16084e-06	1.04307e-05	2.36681e-05	3.83945e-06	7.45621e-05	-0.000664704	0.0115011	0.0104858	0.0593828
	SA02 33	0.151759	28.4456	6.26379	9.6801	10.0118	4.89986e-06	1.64344	0.220201	0.3403	0.351955	0.0577739	1.59833	7.12645e-06	1.01694e-05	2.33546e-05	4.06677e-06	6.78838e-05
6 (2021-01-21)	SA02 01	0.153344	27.9249	6.14904	9.50275	9.82872	1.88348e-05	1.61341	0.220198	0.340295	0.351964	0.0577765	1.5984	7.17256e-06	1.1217e-05	2.12694e-05	3.5784e-06	6.76625e-05
	SA02 02	0.151014	28.3683	6.24679	9.65371	9.98479	1.05177e-05	1.63905	0.220202	0.340296	0.351963	0.0577764	1.59837	6.19086e-06	1.07528e-05	2.01418e-05	3.86815e-06	6.8047e-05	0.00517367	-0.00476185	-0.0152894	0.0101109
	SA02 03	0.15529	28.8537	6.35373	9.819	10.1559	1.2822e-05	1.66705	0.220203	0.3403	0.351973	0.0577752	1.5984	6.75902e-06	9.58474e-06	2.0159e-05	3.54772e-06	6.1143e-05	0.00581747	0.00350956	0.0316456	-0.0288481
	SA02 04	0.146028	27.4272	6.03957	9.33361	9.65346	1.3116e-05	1.58468	0.220202	0.340303	0.351961	0.0577773	1.59835	5.86842e-06	1.1099e-05	2.13382e-05	3.67497e-06	7.44999e-05	0.00282786	0.00506274	-0.0237906	0.0387732
	SA02 05	0.14979	28.2887	6.22922	9.62676	9.95686	7.51036e-06	1.63441	0.2202	0.340301	0.351966	0.0577749	1.59839	7.33537e-06	1.00146e-05	2.36968e-05	4.19228e-06	7.87115e-05	-0.00778185	0.00261772	0.0152631	-0.0139599
	SA02 06	0.14733	28.361	6.24519	9.6513	9.98214	1.05372e-05	1.63856	0.220202	0.340298	0.35196	0.0577741	1.59835	6.91976e-06	1.13128e-05	2.30866e-05	4.06953e-06	7.76854e-05	0.00241691	0.00149236	-0.00306751	0.00489291
	SA02 07	0.142678	27.9632	6.15759	9.51579	9.84202	1.25873e-05	1.61555	0.220202	0.340294	0.351956	0.0577728	1.59833	6.47056e-06	1.00916e-05	2.22034e-05	3.78205e-06	7.36346e-05	0.000177962	-0.0172845	-0.0212388	-0.0705287
	SA02 08	0.155041	28.0272	6.17165	9.53772	9.86469	1.33703e-05	1.6194	0.220202	0.340302	0.351966	0.0577796	1.59838	5.65615e-06	7.6299e-06	1.38432e-05	2.87844e-06	5.15763e-05	-0.00113154	0.0212558	0.0251856	0.102108
	SA02 09	0.15774	28.7456	6.32989	9.78206	10.1174	-1.19585e-06	1.66079	0.220203	0.340295	0.35196	0.0577746	1.59834	6.79888e-06	1.01749e-05	1.86298e-05	4.17211e-06	5.92229e-05	0.00369949	-0.0231073	-0.0194066	-0.0675504
	SA02 10	0.155073	28.5092	6.2778	9.70185	10.0345	1.35648e-05	1.64721	0.220202	0.340304	0.351967	0.0577775	1.59838	6.26848e-06	9.80414e-06	2.1054e-05	3.14399e-06	7.29652e-05	-0.00668923	0.0196218	0.00121021	0.00493282
	SA02 11	0.149156	27.5714	6.07135	9.38259	9.70455	4.70485e-06	1.5931	0.220204	0.340299	0.351973	0.0577797	1.5984	6.62263e-06	1.01156e-05	2.10834e-05	4.00397e-06	7.86618e-05	0.0183353	0.00120956	0.0403018	0.0828777
	SA02 12	0.150475	28.301	6.23186	9.63073	9.96073	1.72879e-05	1.63504	0.220198	0.340294	0.35195	0.0577724	1.59834	7.42191e-06	1.00636e-05	2.21663e-05	3.37636e-06	7.03315e-05	-0.0163453	0.00681134	-0.0152468	-0.0585003
	SA02 13	0.144716	27.4823	6.0516	9.35189	9.67229	1.66519e-05	1.58772	0.220199	0.340284	0.351939	0.0577718	1.59828	7.14684e-06	1.08905e-05	2.19942e-05	4.05527e-06	7.39182e-05	0.00959298	-0.0114861	-0.00250634	0.0462215
	SA02 14	0.14368	27.8044	6.12244	9.46143	9.78537	8.06776e-07	1.60617	0.220196	0.340282	0.351929	0.0577659	1.59826	7.47189e-06	1.17495e-05	2.33763e-05	3.54673e-06	7.82078e-05	-0.0163174	-0.0168742	-0.0444571	-0.108611
	SA02 15	0.161895	28.6464	6.30797	9.74821	10.0823	1.25061e-05	1.655	0.2202	0.340292	0.35195	0.0577726	1.59832	7.19939e-06	1.12489e-05	2.20522e-05	4.1457e-06	7.04672e-05	0.0124419	0.0134496	0.0430975	0.0736619
	SA02 16	0.156704	28.3168	6.23535	9.63605	9.96604	9.72069e-06	1.63591	0.220198	0.340292	0.351941	0.0577707	1.59829	6.72975e-06	9.18946e-06	2.15862e-05	3.81314e-06	7.06502e-05	-0.00138777	0.00679385	-0.00748743	-0.00390127
	SA02 17	0.155777	28.416	6.25716	9.6697	10.0009	1.75638e-05	1.6416	0.220197	0.340287	0.351938	0.0577693	1.59828	6.73e-06	1.05354e-05	2.3508e-05	4.04129e-06	8.29807e-05	-0.00260409	-0.000401123	-0.0118057	-0.0309616
	SA02 18	0.153847	28.3521	6.2431	9.64782	9.97851	6.96774e-06	1.63796	0.220198	0.340283	0.351943	0.0577714	1.5983	6.88274e-06	1.08899e-05	2.19256e-05	3.36292e-06	7.20761e-05	0.00428175	-0.0143754	0.0100901	0.0157036
	SA02 19	0.147457	27.4781	6.05061	9.35057	9.67083	8.3674e-06	1.58749	0.220196	0.340289	0.35194	0.0577718	1.5983	7.36827e-06	1.03447e-05	2.38679e-05	4.29019e-06	7.7695e-05	-0.00574919	0.0139212	-0.00633681	0.0242404
	SA02 20	0.1502	28.3405	6.24053	9.64393	9.9744	-4.12224e-06	1.63723	0.220197	0.340285	0.351942	0.0577693	1.5983	6.61736e-06	1.11369e-05	2.14155e-05	3.45897e-06	7.31244e-05	0.0112265	0.00350689	0.0243993	-0.0119672
	SA02 21	0.146528	27.9149	6.14672	9.49893	9.82417	-3.26415e-06	1.61262	0.220193	0.340279	0.351927	0.0577683	1.59826	7.60049e-06	1.0891e-05	2.20328e-05	4.07424e-06	6.10487e-05	-0.0284975	-0.0263606	-0.0453103	-0.0282403
	SA02 22	0.171991	28.532	6.28284	9.70926	10.0418	-7.39033e-06	1.64833	0.220202	0.340291	0.351944	0.0577705	1.59828	6.61546e-06	1.01682e-05	1.91852e-05	3.84167e-06	6.42009e-05	0.0325368	0.0289003	0.0427989	0.0523611
	SA02 23	0.161024	28.551	6.28685	9.71547	10.0481	6.7002e-06	1.64932	0.220196	0.340283	0.351931	0.0577666	1.59826	6.25238e-06	9.05788e-06	2.05171e-05	3.80057e-06	6.4986e-05	-0.0329814	-0.0318877	-0.0702995	-0.131484
	SA02 24	0.158171	28.5953	6.29685	9.73097	10.0648	3.00282e-06	1.65221	0.220205	0.340297	0.351967	0.0577779	1.59836	6.77635e-06	1.22136e-05	2.30026e-05	4.34973e-06	7.80437e-05	0.0113424	-0.00874426	0.00177823	0.0694043
	SA02 25	0.160488	29.2301	6.43675	9.94758	10.2892	7.9796e-06	1.68898	0.220209	0.340317	0.352002	0.0577812	1.59849	6.01091e-06	1.31097e-05	2.52282e-05	4.74192e-06	8.6756e-05	0.0209162	0.0541589	0.110033	0.111085
	SA02 26	0.153956	28.4566	6.26626	9.68383	10.0158	1.43079e-05	1.64402	0.220203	0.340299	0.351959	0.0577717	1.59834	6.71378e-06	9.61247e-06	2.18793e-05	3.81375e-06	7.5171e-05	-0.00962789	-0.0200019	-0.0494508	-0.0764936
	SA02 27	0.151002	28.2033	6.21045	9.59748	9.92632	1.9063e-05	1.62935	0.220202	0.340296	0.351951	0.057771	1.59831	6.73454e-06	8.72577e-06	2.06054e-05	3.26615e-06	6.32052e-05	0.00768084	0.0122413	0.0128051	0.00433514
	SA02 28	0.14988	28.2762	6.22638	9.622	9.95153	3.90696e-06	1.63353	0.220198	0.340284	0.351935	0.0577699	1.59827	6.51146e-06	9.46464e-06	1.94378e-05	2.93155e-06	6.41048e-05	-0.0117486	-0.0223848	-0.041861	-0.0161898
	SA02 29	0.15451	28.6929	6.31817	9.76393	10.0986	1.77778e-05	1.65764	0.220198	0.340287	0.351947	0.0577706	1.59832	6.3846e-06	1.13768e-05	2.59532e-05	4.04351e-06	8.65494e-05	-0.0231598	-0.0067506	-0.00893671	-0.00869876
	SA02 30	0.15664	28.8167	6.34574	9.80628	10.1427	1.28821e-05	1.66483	0.220209	0.340295	0.351966	0.0577722	1.59833	6.44559e-06	1.0064e-05	2.19258e-05	3.29898e-06	7.11139e-05	0.0315282	0.00825403	0.0352905	0.000785123
	SA02 31	0.154724	29.2862	6.44903	9.96611	10.3078	1.60899e-05	1.692	0.220206	0.340298	0.35196	0.0577739	1.59832	6.81284e-06	1.08594e-05	2.23778e-05	3.52347e-06	7.35885e-05	0.00948818	0.017099	0.0429582	0.0788743
	SA02 32	0.149918	28.9322	6.37085	9.84535	10.1821	7.45783e-06	1.67132	0.220199	0.340289	0.351924	0.0577663	1.59821	6.34254e-06	8.95314e-06	1.82094e-05	2.60031e-06	6.05353e-05	-0.00787221	-0.00754521	-0.0590028	-0.0492825
	SA02 33	0.143944	28.2287	6.21583	9.60585	9.93466	1.82066e-05	1.63064	0.220195	0.340285	0.35193	0.0577645	1.59826	6.37018e-06	1.00116e-05	2.0124e-05	3.60696e-06	6.98538e-05	-0.0089069	-0.00694823	0.0209083	-0.0313115
	SA02 34	0.143912	28.3809	6.24936	9.65767	9.98805	1.40934e-05	1.6395	0.220195	0.340285	0.35192	0.0577663	1.59822	6.92123e-06	1.01621e-05	2.44229e-05	4.48821e-06	8.51143e-05
7 (2021-01-21)	SA02 01	0.170025	27.9289	6.14989	9.50389	9.82931	1.32697e-05	1.61343	0.220197	0.340287	0.351936	0.0577684	1.59828	6.20046e-06	9.77248e-06	1.80472e-05	3.44423e-06	5.45269e-05
	SA02 02	0.177102	29.0626	6.39971	9.88985	10.2285	1.20049e-05	1.67893	0.220203	0.340292	0.351943	0.0577685	1.59826	6.0402e-06	9.91311e-06	1.837e-05	3.56989e-06	6.06929e-05	0.0219891	-0.00192259	-0.0318017	-0.0406595
	SA02 03	0.177613	28.9302	6.37046	9.845	10.1828	-3.13842e-06	1.67141	0.2202	0.340299	0.351973	0.0577733	1.59842	7.35529e-06	1.03904e-05	2.08276e-05	3.23732e-06	7.24278e-05	0.0201237	0.0617704	0.150766	0.0906075
	SA02 04	0.156655	27.8105	6.12357	9.46293	9.78652	1.78245e-05	1.60656	0.220188	0.340264	0.351896	0.0577676	1.59816	6.2802e-06	9.43601e-06	1.92874e-05	3.24319e-06	6.29561e-05	-0.0350776	-0.0542984	-0.110301	-0.0314159
	SA02 05	0.157141	28.3894	6.25114	9.66001	9.99033	1.60027e-05	1.63995	0.220192	0.340266	0.351897	0.0577655	1.59814	6.01677e-06	1.00321e-05	2.0894e-05	3.69823e-06	7.73221e-05	-0.000473084	-0.0156787	-0.00347698	0.0180969
	SA02 06	0.181993	28.6766	6.31449	9.75809	10.0915	2.92502e-05	1.65642	0.220196	0.340278	0.351901	0.0577614	1.59813	6.75092e-06	1.00211e-05	1.91613e-05	3.37261e-06	7.36807e-05	0.00836773	0.0233158	-0.0271026	-0.0569882
	SA02 07	0.175187	28.7186	6.32376	9.77229	10.1069	8.26709e-06	1.65892	0.220196	0.340275	0.351923	0.0577638	1.59823	7.09558e-06	1.14623e-05	2.24954e-05	3.37132e-06	7.00373e-05	-0.00814628	-0.022236	0.021876	-0.021336
	SA02 08	0.179726	29.1487	6.41856	9.91897	10.2585	3.39145e-06	1.6839	0.2202	0.340286	0.351931	0.0577687	1.59823	6.80857e-06	1.09038e-05	2.04183e-05	3.4117e-06	6.78801e-05	0.00574742	0.0167082	-0.000920006	0.0594899
	SA02 09	0.175717	28.8046	6.34283	9.80188	10.1376	1.39749e-05	1.66397	0.220201	0.340287	0.351938	0.0577667	1.59826	6.80949e-06	1.04337e-05	2.10334e-05	3.02589e-06	7.0129e-05	0.00960432	0.00297269	0.0225213	-0.00770274
	SA02 10	0.175229	28.9019	6.36416	9.83495	10.1716	-1.39079e-05	1.66956	0.220198	0.340285	0.35193	0.0577656	1.59825	6.15858e-06	1.01758e-05	2.12116e-05	3.10615e-06	7.37002e-05	-0.0106173	-0.00544428	-0.0233156	-0.0227209
	SA02 11	0.167859	29.2079	6.4316	9.93914	10.2796	6.74716e-06	1.68728	0.220199	0.340287	0.351939	0.0577672	1.59827	6.97613e-06	1.01979e-05	2.05895e-05	3.46402e-06	6.83635e-05	0.00665219	0.00730066	0.0337425	0.0312209
	SA02 12	0.157911	28.5651	6.29	9.72031	10.0529	1.84351e-05	1.65008	0.220198	0.340284	0.351923	0.0577651	1.59821	5.402e-06	9.37533e-06	1.6484e-05	3.1697e-06	5.83652e-05	-0.00118804	0.00225883	-0.0304144	-0.0238917
	SA02 13	0.188216	29.3113	6.45431	9.97413	10.3157	-2.05297e-06	1.69322	0.220197	0.340279	0.35193	0.0577658	1.59825	5.95041e-06	1.19436e-05	2.08054e-05	3.90158e-06	7.29996e-05	0.0117003	-0.0118085	0.0114891	0.00170818
	SA02 14	0.182558	28.8723	6.35748	9.82484	10.1612	-5.1339e-06	1.66788	0.220191	0.340283	0.351928	0.0577663	1.59828	7.09748e-06	1.05851e-05	2.30841e-05	3.85722e-06	7.54588e-05	-0.0314053	-0.00263624	-0.02468	0.0154697
	SA02 15	0.176898	29.1902	6.42771	9.93317	10.2735	3.84686e-06	1.68621	0.220199	0.340288	0.351943	0.057765	1.59829	7.0113e-06	1.06303e-05	2.35323e-05	4.11494e-06	7.85262e-05	0.0190462	0.0173088	0.0359722	-0.00757121
	SA02 16	0.178759	29.2154	6.43323	9.94151	10.282	1.03233e-05	1.68763	0.220199	0.340282	0.351933	0.0577646	1.59825	6.7591e-06	9.20736e-06	1.94129e-05	3.78946e-06	6.576e-05	-0.0093621	-0.0357738	-0.0585404	-0.0714709
	SA02 17	0.178674	29.2358	6.43782	9.949	10.2901	9.1913e-06	1.68905	0.220202	0.3403	0.351964	0.0577724	1.59837	6.59641e-06	9.88444e-06	2.19285e-05	3.90259e-06	7.52914e-05	0.00472964	0.0408306	0.0532824	0.0875248
	SA02 18	0.1769	29.2131	6.43287	9.94101	10.282	9.06391e-06	1.68768	0.220204	0.34029	0.351958	0.0577701	1.59833	6.55749e-06	1.01936e-05	2.1584e-05	3.96434e-06	7.46235e-05	0.000391856	-0.0239095	-0.0118519	-0.0340987
	SA02 19	0.165015	28.7468	6.33023	9.7825	10.1179	2.83921e-05	1.66078	0.220205	0.340296	0.35196	0.0577718	1.59833	6.58077e-06	9.2952e-06	1.94148e-05	3.44197e-06	6.54475e-05	0.0233998	0.0125913	0.000785692	0.0103817
	SA02 20	0.187445	29.1155	6.41116	9.9079	10.2477	-6.62672e-06	1.6821	0.220196	0.340294	0.351961	0.0577723	1.5984	6.24288e-06	9.80939e-06	2.24152e-05	3.78479e-06	7.60905e-05	-0.0345871	0.00542333	0.0307131	0.00799947
	SA02 21	0.186449	29.0672	6.40074	9.89133	10.2302	1.57285e-05	1.6793	0.220203	0.340288	0.351941	0.0577718	1.59826	8.13109e-06	1.07172e-05	2.31176e-05	4.09145e-06	6.69467e-05	0.0392192	0.00975923	0.0103602	0.0654608
	SA02 22	0.182185	28.6279	6.30368	9.74142	10.0747	1.09658e-05	1.65367	0.220192	0.340276	0.351914	0.0577638	1.59822	7.21701e-06	9.74425e-06	2.1257e-05	3.19758e-06	6.17104e-05	-0.0552535	-0.0458072	-0.103399	-0.117071
	SA02 23	0.178507	29.3457	6.46212	9.98627	10.3287	8.52873e-06	1.69532	0.220205	0.340294	0.351959	0.0577693	1.59833	6.51843e-06	9.4785e-06	2.10037e-05	3.92587e-06	6.84198e-05	0.0360188	0.0217382	0.0712839	0.0383777
	SA02 24	0.18117	29.4775	6.49106	10.0312	10.3749	1.33613e-06	1.70295	0.220203	0.340298	0.351955	0.0577704	1.59832	6.91861e-06	1.07272e-05	2.0084e-05	3.35619e-06	6.10955e-05	0.0136229	0.00798349	-0.00314897	0.00990672
	SA02 25	0.17789	29.1305	6.4144	9.91308	10.2527	4.29594e-06	1.6829	0.220194	0.340297	0.351952	0.0577703	1.59837	6.64474e-06	1.10937e-05	1.87035e-05	3.78488e-06	5.61967e-05	-0.0395268	-0.00491413	0.00266514	-0.00200241
	SA02 26	0.175764	28.9975	6.38538	9.86789	10.2058	1.41204e-05	1.67524	0.220203	0.340298	0.351948	0.0577705	1.59829	6.88081e-06	1.07029e-05	2.33503e-05	4.50488e-06	7.55405e-05	0.0353803	0.0347376	0.0295804	0.087827
	SA02 27	0.180067	29.0503	6.3968	9.88521	10.2236	1.38801e-05	1.67797	0.220196	0.340277	0.351922	0.0577605	1.59822	5.92635e-06	8.332e-06	1.83747e-05	2.863e-06	6.68081e-05	-0.0146548	-0.0318668	-0.0414113	-0.135381
	SA02 28	0.180565	29.3592	6.46482	9.99031	10.3324	-3.4797e-06	1.69599	0.220196	0.340276	0.351926	0.0577661	1.59824	7.18541e-06	9.62564e-06	2.02547e-05	3.58639e-06	6.7888e-05	-0.0165229	-0.0165597	-0.0226843	0.0146189
	SA02 29	0.176828	28.6144	6.30101	9.73714	10.0708	2.64743e-06	1.65306	0.220203	0.340288	0.351946	0.0577701	1.59828	6.65979e-06	8.3284e-06	1.74916e-05	3.03449e-06	5.17269e-05	0.0351419	0.0183677	0.045578	0.0530041
	SA02 30	0.165104	29.2808	6.44751	9.96391	10.3051	1.15758e-05	1.69151	0.220195	0.340286	0.351934	0.0577679	1.59829	6.22452e-06	1.00515e-05	2.20021e-05	3.18816e-06	7.44479e-05	-0.0430098	0.000125816	-0.0316393	0.00248368
	SA02 31	0.161497	29.1583	6.42085	9.9222	10.2623	2.33998e-06	1.68437	0.220205	0.340285	0.351944	0.0577655	1.59825	7.07489e-06	1.10229e-05	2.17522e-05	4.58488e-06	6.40697e-05	0.0443468	0.00376769	0.052044	0.00966205
	SA02 32	0.158733	28.9994	6.3856	9.86801	10.2056	2.483e-05	1.67509	0.220196	0.340281	0.351917	0.0577619	1.5982	7.18921e-06	9.78681e-06	2.25098e-05	3.65474e-06	7.16041e-05	-0.0195276	0.00539748	-0.0358725	0.00379712
	SA02 33	0.157893	29.1906	6.42769	9.93286	10.2729	1.20114e-05	1.68603	0.220196	0.340273	0.351916	0.0577579	1.5982	6.54383e-06	1.0388e-05	2.31997e-05	4.2852e-06	7.79419e-05
8 (2021-01-21)	SA02 01	0.141487	28.0789	6.18273	9.55467	9.88106	5.72983e-06	1.62185	0.22019	0.340278	0.351898	0.0577597	1.59816	6.72571e-06	9.08402e-06	1.93941e-05	3.6458e-06	6.00923e-05
	SA02 02	0.145317	29.0753	6.40238	9.89375	10.2322	4.75064e-06	1.67939	0.220199	0.340277	0.351916	0.0577588	1.59817	6.51909e-06	1.21267e-05	2.28601e-05	4.3991e-06	7.28811e-05	0.0128992	-0.0142899	-0.0209117	-0.0897195
	SA02 03	0.146586	29.179	6.42531	9.92927	10.2697	1.95987e-05	1.68565	0.220202	0.340287	0.351949	0.0577683	1.5983	6.39456e-06	9.23822e-06	2.0792e-05	4.14758e-06	7.22414e-05	0.0202624	0.0203391	0.0816199	0.142394
	SA02 04	0.147357	29.5075	6.4975	10.0409	10.3846	1.28808e-05	1.70444	0.220197	0.340282	0.351924	0.0577614	1.59822	6.84806e-06	1.03936e-05	2.26654e-05	4.89796e-06	8.00913e-05	-0.00416561	0.00364646	-0.00736453	-0.031938
	SA02 05	0.145163	29.1903	6.42755	9.93281	10.2724	1.5614e-05	1.68601	0.220193	0.340275	0.351904	0.0577582	1.59816	7.0345e-06	1.10944e-05	2.30484e-05	3.95108e-06	6.93235e-05	-0.00385018	-0.00687117	-0.0468383	-0.0518192
	SA02 06	0.142738	28.9503	6.37466	9.85109	10.1884	1.16093e-05	1.67223	0.220191	0.340272	0.351918	0.0577609	1.59824	7.24403e-06	1.1495e-05	2.39046e-05	4.00387e-06	7.47177e-05	-0.0192828	-0.0152526	-0.00997248	-0.0031468
	SA02 07	0.147165	29.8832	6.58025	10.1688	10.5173	3.02416e-05	1.72621	0.220198	0.34028	0.351938	0.057764	1.59828	7.20422e-06	1.38733e-05	2.66943e-05	5.11552e-06	9.05998e-05	0.0266857	0.0248805	0.0794054	0.0822862
	SA02 08	0.145417	28.6108	6.29991	9.73551	10.0684	8.73582e-06	1.65252	0.220192	0.340271	0.351903	0.0577576	1.59816	6.00194e-06	1.0864e-05	2.23909e-05	3.78171e-06	7.53433e-05	-0.00481236	-0.0171847	-0.035877	-0.0308646
	SA02 09	0.144879	28.6539	6.30932	9.75025	10.0833	1.69002e-05	1.65493	0.220189	0.340274	0.351893	0.0577548	1.59814	7.32254e-06	1.03271e-05	2.0295e-05	4.21053e-06	6.155e-05	-0.00681608	0.0100011	-0.0237174	-0.0461058
	SA02 10	0.145945	28.9765	6.38036	9.85992	10.197	1.76707e-05	1.67363	0.220189	0.34027	0.351899	0.0577573	1.59817	6.5906e-06	1.11669e-05	2.24687e-05	3.64962e-06	7.21127e-05	0.0112559	-0.00945286	0.0125692	0.0132982
	SA02 11	0.134457	26.7947	5.89981	9.11757	9.42913	2.4916e-05	1.54763	0.220184	0.340272	0.351897	0.0577582	1.59819	6.77131e-06	1.09676e-05	2.1181e-05	4.0908e-06	6.75629e-05	-0.0368698	-0.00380905	-0.032178	-0.0293307
	SA02 12	0.144505	28.9167	6.36736	9.83981	10.1765	1.07791e-05	1.67035	0.220195	0.340277	0.351917	0.0577626	1.5982	6.52085e-06	1.21532e-05	2.36996e-05	4.72382e-06	8.62118e-05	0.0218941	0.00576847	0.0252457	0.0650815
	SA02 13	0.141949	28.5303	6.28231	9.70832	10.0405	-9.01156e-06	1.64792	0.220197	0.340278	0.35192	0.0577594	1.59821	5.94102e-06	8.85198e-06	1.94876e-05	3.52855e-06	6.84075e-05	0.0111632	-0.0038726	-0.000622839	-0.0774472
	SA02 14	0.13607	27.574	6.07162	9.38295	9.70399	4.91151e-06	1.59283	0.220193	0.340282	0.351923	0.0577652	1.59824	6.23554e-06	9.84576e-06	1.63144e-05	3.44506e-06	5.4538e-05	-0.0219374	0.0136635	0.005792	0.0965556
	SA02 15	0.149074	28.8902	6.36163	9.83068	10.1672	2.68456e-05	1.6687	0.2202	0.340276	0.351922	0.0577598	1.59819	6.75742e-06	9.17388e-06	1.7607e-05	2.44713e-06	5.95145e-05	0.0265972	-0.00953931	0.0084309	-0.052666
	SA02 16	0.145592	28.6616	6.31115	9.75295	10.0866	1.8656e-06	1.65553	0.220194	0.340277	0.351914	0.0577605	1.5982	7.2378e-06	9.50829e-06	2.08058e-05	3.73106e-06	6.38706e-05	0.00183342	0.0182886	0.0102352	0.0251273
	SA02 17	0.143916	28.4452	6.26331	9.67896	10.01	1.68129e-05	1.64297	0.220188	0.340266	0.3519	0.0577583	1.59818	6.91303e-06	9.19119e-06	1.90142e-05	3.50495e-06	6.32837e-05	-0.0316146	-0.0256158	-0.0359791	-0.0425883
	SA02 18	0.143076	28.4393	6.26223	9.67713	10.0083	-7.14288e-08	1.64271	0.220196	0.340271	0.351911	0.057761	1.59818	5.82882e-06	9.2078e-06	1.91864e-05	3.62701e-06	6.79991e-05	0.0213835	-0.00527272	0.0025361	0.0262227
	SA02 19	0.143038	28.5169	6.27926	9.70379	10.0358	2.77287e-05	1.64718	0.220194	0.340281	0.351921	0.0577607	1.59823	7.02918e-06	9.29989e-06	2.05254e-05	3.8267e-06	7.23562e-05	-0.00342344	0.020842	0.0350618	0.0235937
	SA02 20	0.141501	28.3435	6.24107	9.64466	9.97437	2.29335e-06	1.63707	0.220194	0.340276	0.351905	0.0577576	1.59816	6.85059e-06	9.3578e-06	2.02824e-05	3.11169e-06	6.79447e-05	-0.00669659	-0.00332187	-0.0195414	-0.0252162
	SA02 21	0.1409	28.3306	6.23831	9.6402	9.96981	6.29873e-06	1.63633	0.220196	0.340273	0.351904	0.0577575	1.59814	6.797e-06	9.11385e-06	1.95341e-05	3.47506e-06	7.14078e-05	0.0101929	0.0104071	0.00401099	0.00541852
	SA02 22	0.149012	28.5204	6.28007	9.70454	10.0365	4.47637e-06	1.64727	0.220194	0.340264	0.351899	0.0577568	1.59813	7.60512e-06	9.78195e-06	2.10963e-05	3.56175e-06	6.72726e-05	0.00541201	-0.0235881	-0.018428	-0.00597278
	SA02 23	0.145905	28.2835	6.22778	9.62407	9.9533	1.16846e-05	1.63359	0.22019	0.34027	0.351908	0.0577567	1.5982	6.9631e-06	9.95902e-06	1.85875e-05	3.80741e-06	5.34656e-05	-0.00828495	0.00065354	0.0159629	-0.00276578
	SA02 24	0.144815	28.5001	6.27547	9.69798	10.0295	1.84276e-05	1.64611	0.22019	0.340276	0.351905	0.057757	1.59819	7.08528e-06	1.12645e-05	2.09248e-05	3.48228e-06	7.10657e-05	-0.0167043	0.00625479	-0.0169917	-0.025395
	SA02 25	0.143357	28.3534	6.24335	9.64812	9.97817	7.97988e-06	1.63773	0.220197	0.340278	0.351914	0.0577602	1.59818	6.81768e-06	1.19064e-05	2.44066e-05	4.14183e-06	7.85889e-05	0.0218113	-0.00736428	0.00177761	0.0110076
	SA02 26	0.144142	28.5493	6.2864	9.71495	10.0473	8.26011e-06	1.64909	0.220194	0.340285	0.351922	0.0577621	1.59824	6.73686e-06	1.10797e-05	2.14277e-05	4.05448e-06	7.01223e-05	-0.00340841	0.0393019	0.0394531	0.0594247
	SA02 27	0.143296	28.567	6.29028	9.72042	10.053	7.66424e-07	1.64998	0.220192	0.340265	0.351903	0.0577572	1.59816	6.67528e-06	1.02075e-05	2.20765e-05	4.01809e-06	7.19007e-05	-0.00314227	-0.0495897	-0.0278413	-0.0467596
	SA02 28	0.141341	28.3226	6.23646	9.63766	9.96698	-3.65351e-06	1.63588	0.220193	0.340279	0.351902	0.0577576	1.59816	7.44493e-06	1.04165e-05	2.31458e-05	4.42903e-06	7.66338e-05	-0.00657675	0.0193759	-0.0236985	-0.0158236
	SA02 29	0.145132	28.8513	6.35296	9.81754	10.1535	-1.9523e-06	1.66648	0.220196	0.340279	0.351919	0.0577599	1.59821	5.66621e-06	9.21453e-06	2.07232e-05	4.06999e-06	7.0896e-05	0.00659476	0.000733949	0.0347228	0.00582281
	SA02 30	0.139901	27.8894	6.14115	9.49027	9.81479	1.331e-05	1.61097	0.220196	0.340279	0.351911	0.0577615	1.59817	6.28713e-06	1.21435e-05	2.32528e-05	4.47717e-06	8.08338e-05	0.00824795	0.014739	-0.00257517	0.0421506
	SA02 31	0.136994	27.2877	6.00856	9.28522	9.60283	1.48041e-05	1.57612	0.220192	0.340269	0.351905	0.0577583	1.59817	7.57163e-06	1.01778e-05	2.17356e-05	4.10317e-06	6.5341e-05	-0.00345642	-0.0141565	0.0136434	-0.00805468
	SA02 32	0.133695	26.9714	5.93889	9.17763	9.49114	5.00659e-06	1.55779	0.22019	0.340269	0.351889	0.0577559	1.59811	6.62831e-06	1.07191e-05	2.03e-05	3.36254e-06	6.19767e-05	-0.0179587	0.00890728	-0.0189028	-0.0191418
	SA02 33	0.134688	27.3556	6.02361	9.30816	9.62623	1.87348e-05	1.57997	0.220196	0.340263	0.351887	0.0577558	1.59806	5.71822e-06	1.00379e-05	2.08657e-05	3.39999e-06	7.65424e-05	0.0171975	-0.0283466	-0.0365126	-0.0477848
	SA02 34	0.134171	27.4117	6.03593	9.32759	9.6466	1.53052e-05	1.58335	0.220194	0.340276	0.35191	0.0577612	1.59818	6.10645e-06	8.84688e-06	1.73199e-05	3.11216e-06	6.28281e-05	-0.00180466	0.0342644	0.073293	0.0873665
	SA02 35	0.131318	26.9062	5.92461	9.15534	9.46799	1.16296e-05	1.55404	0.220193	0.340265	0.351882	0.0577566	1.59806	6.5718e-06	1.1082e-05	2.17781e-05	4.1495e-06	7.22833e-05

## Sheet: Mud Tank_LA
LA-MC-ICP-MS Zr isotopic data for Mud Tank zircon ( GJ-1 zircon used as Reference material)
Session	Sample	89Y	90Zr	91Zr	92Zr	94Zr	95Mo	96Zr	91/90	92/90	94/90	96/90	94/91	91/90(2se)	92/90(2se)	94/90(2se)	96/90(2se)	94/91(2se)	To GJ-1				To IPGP-Zr
																			δ 91/90	δ 92/90	δ 94/90	δ 96/90	δ 94/90
Session 1 （2021-1-11）	GJ-1 01	0.0187308	19.9701	4.40893	6.82812	7.10162	4.30773e-05	1.17079	0.220744	0.341862	0.355497	0.0586032	1.61045	7.23091e-06	1.07499e-05	2.13768e-05	4.30086e-06	6.5466e-05
	MUD 01	0.00562344	18.553	4.09632	6.34394	6.59814	3.55093e-05	1.0879	0.220763	0.341893	0.35554	0.0586169	1.6105	6.97288e-06	1.14309e-05	2.25293e-05	4.242e-06	6.93663e-05	0.055894	0.0626285	0.0972131	0.189564	0.0892123
	GJ-1 02	0.0176713	18.7577	4.14147	6.41377	6.67064	5.13461e-05	1.09977	0.220758	0.341881	0.355514	0.0586084	1.61042	6.13434e-06	1.10629e-05	2.06444e-05	4.45467e-06	7.08895e-05
	MUD 02	0.00630666	18.8946	4.17187	6.46086	6.71968	4.92863e-05	1.10795	0.220764	0.341893	0.355536	0.0586182	1.61048	6.52924e-06	1.03864e-05	1.84013e-05	4.29178e-06	6.14678e-05	0.0292828	0.03452	0.0661508	0.153017	0.0581503
	GJ-1 03	0.0177746	18.89	4.17061	6.45899	6.71763	4.60346e-05	1.10756	0.220756	0.341881	0.355511	0.0586101	1.61043	6.08387e-06	1.06559e-05	2.13253e-05	4.11897e-06	7.41893e-05
	MUD 03	0.0084411	18.692	4.12698	6.39163	6.64751	4.77158e-05	1.09603	0.220762	0.341903	0.355545	0.0586183	1.61053	7.08369e-06	1.06603e-05	2.10741e-05	4.45912e-06	6.96344e-05	0.0434897	0.0828541	0.123322	0.179938	0.115321
	GJ-1 04	0.0176605	18.8001	4.15068	6.42821	6.68526	5.0294e-05	1.10222	0.220749	0.341868	0.35549	0.0586053	1.61038	6.82086e-06	1.11098e-05	2.02852e-05	4.00824e-06	6.29888e-05
	MUD 04	0.00633848	18.8395	4.1596	6.44208	6.70016	4.07495e-05	1.10472	0.220765	0.341903	0.355548	0.0586184	1.61053	6.61008e-06	1.05974e-05	2.14086e-05	4.19109e-06	7.1507e-05	0.0535033	0.0593655	0.102664	0.158345	0.094663
	GJ-1 05	0.017691	18.8473	4.16116	6.44466	6.70254	5.54645e-05	1.10505	0.220756	0.341897	0.355534	0.0586129	1.61053	6.20011e-06	8.83055e-06	1.67084e-05	3.65138e-06	5.65121e-05
	MUD 05	0.00772998	18.5281	4.09081	6.33561	6.58945	4.46814e-05	1.08643	0.220758	0.341898	0.355545	0.0586157	1.61057	8.07264e-06	1.04578e-05	1.992e-05	4.06271e-06	5.84576e-05	0.00727409	0.00287209	0.0209935	0.0252145	0.0129934
	GJ-1 06	0.0177136	18.9041	4.17384	6.46418	6.72322	4.49857e-05	1.10852	0.220756	0.341898	0.355541	0.0586155	1.61056	7.16212e-06	1.0892e-05	2.19419e-05	3.94778e-06	7.96866e-05
	MUD 06	0.00623528	18.5653	4.0991	6.34825	6.60283	3.91559e-05	1.08867	0.220765	0.341896	0.355558	0.058619	1.61057	7.43634e-06	1.07254e-05	2.11735e-05	4.38491e-06	7.0206e-05	0.0526564	0.0147487	0.0691965	0.113677	0.061196
	GJ-1 07	0.0176526	18.7203	4.13313	6.40103	6.6574	4.58965e-05	1.09761	0.220751	0.341884	0.355525	0.0586091	1.61052	6.7621e-06	1.01633e-05	2.061e-05	4.15647e-06	6.63258e-05
	MUD 07	0.00553326	18.4296	4.0691	6.3019	6.55458	3.41591e-05	1.08072	0.220764	0.341902	0.355566	0.0586212	1.61062	6.83646e-06	9.32742e-06	1.97031e-05	3.87085e-06	5.73546e-05	0.0432654	0.0351844	0.090797	0.15023	0.0827963
	GJ-1 08	0.0174715	18.5929	4.10507	6.35772	6.61233	4.27485e-05	1.09021	0.220757	0.341896	0.355543	0.0586156	1.61056	7.18345e-06	9.02926e-06	1.95477e-05	3.78874e-06	6.46627e-05
	MUD 08	0.00619277	18.4984	4.0842	6.32544	6.57906	4.24244e-05	1.08479	0.220757	0.341899	0.355559	0.0586204	1.61064	7.29912e-06	1.09461e-05	2.32687e-05	4.42134e-06	7.83812e-05	0.00382014	0.0231812	0.0828749	0.113715	0.0748742
	GJ-1 09	0.0177622	18.8999	4.17283	6.46259	6.72125	4.73e-05	1.10817	0.220755	0.341887	0.355517	0.0586119	1.61046	5.75447e-06	8.46952e-06	1.99883e-05	3.83778e-06	7.35137e-05
	MUD 09	0.0063601	18.4324	4.06973	6.30288	6.55551	5.00623e-05	1.08091	0.220762	0.341904	0.355554	0.0586226	1.61058	6.90667e-06	1.00337e-05	1.96558e-05	4.53628e-06	5.89475e-05	0.0321658	0.0654236	0.116972	0.2202	0.108971
	GJ-1 10	0.0175996	18.6753	4.12328	6.38564	6.64115	3.95709e-05	1.09492	0.220754	0.341877	0.355509	0.0586075	1.61043	7.84701e-06	1.16175e-05	2.23036e-05	4.47766e-06	7.1583e-05
	MUD 10	0.0101391	18.4976	4.08416	6.32517	6.57868	4.09465e-05	1.08467	0.220762	0.341895	0.355543	0.058616	1.61053	5.95945e-06	9.55749e-06	2.03666e-05	3.94728e-06	7.29761e-05	0.0189433	0.026924	0.0639764	0.0867646	0.0559759
	GJ-1 11	0.0172879	18.5274	4.09066	6.33529	6.58899	4.91691e-05	1.08638	0.220761	0.341894	0.355531	0.0586143	1.61048	6.84942e-06	1.13019e-05	2.25315e-05	4.37721e-06	7.77999e-05
	MUD 11	0.00593172	18.3831	4.05877	6.28616	6.53794	4.86294e-05	1.07793	0.220761	0.341909	0.355548	0.058616	1.61056	8.01512e-06	1.15065e-05	2.305e-05	4.35928e-06	7.24753e-05	0.0142426	0.0504811	0.0691108	0.0595557	0.0611102
	GJ-1 12	0.0160372	17.0811	3.77124	5.84058	6.07413	3.50703e-05	1.0015	0.220755	0.341889	0.355515	0.0586107	1.61045	8.32839e-06	1.17814e-05	2.32096e-05	4.54511e-06	6.85113e-05
	MUD 12	0.00570244	18.3861	4.05937	6.28706	6.53887	4.82748e-05	1.0781	0.220754	0.341902	0.355541	0.0586144	1.61057	6.72703e-06	9.73277e-06	2.04493e-05	4.16404e-06	6.85374e-05	-0.000554423	0.0641353	0.115125	0.131179	0.107124
	GJ-1 13	0.0171133	18.3085	4.04217	6.26004	6.5103	4.5799e-05	1.0733	0.220754	0.341871	0.355485	0.0586027	1.61032	7.72346e-06	1.08587e-05	2.42068e-05	5.04659e-06	7.03796e-05
	MUD 13	0.00579192	18.4721	4.07845	6.31625	6.56889	6.02229e-05	1.08298	0.22076	0.341889	0.355511	0.0586065	1.61039	7.53646e-06	1.04159e-05	2.10443e-05	3.69336e-06	6.50817e-05	0.0512083	0.0606424	0.0635702	0.0517874	0.0555697
	GJ-1 14	0.0173348	18.5206	4.08893	6.33253	6.58588	5.01969e-05	1.08579	0.220745	0.341865	0.355492	0.0586044	1.61042	6.79217e-06	1.13952e-05	1.95392e-05	4.12403e-06	6.49696e-05
	MUD 14	0.00595121	18.4527	4.0742	6.3096	6.56207	4.7973e-05	1.08187	0.22076	0.341886	0.355511	0.0586064	1.6104	7.93337e-06	1.19919e-05	2.34009e-05	4.94988e-06	7.49514e-05	0.0559358	0.0610443	0.0819988	0.0897848	0.0739981
	GJ-1 15	0.0169458	18.078	3.99126	6.18112	6.42815	4.61656e-05	1.05974	0.22075	0.341864	0.355472	0.058598	1.61029	7.51071e-06	1.1994e-05	2.17019e-05	4.25507e-06	7.38362e-05
	MUD 15	0.0101994	18.3712	4.0561	6.28167	6.53309	4.32576e-05	1.07707	0.220758	0.341885	0.355521	0.0586078	1.61046	6.29464e-06	1.0187e-05	2.06659e-05	4.02707e-06	6.97468e-05	0.046555	0.0554817	0.130919	0.141795	0.122918
	GJ-1 16	0.0173287	18.498	4.08392	6.32476	6.57758	4.35929e-05	1.0844	0.220745	0.341867	0.355477	0.058601	1.61035	7.02448e-06	1.16509e-05	2.16678e-05	5.02351e-06	7.80999e-05
	MUD 16	0.00650263	18.4283	4.0687	6.30132	6.55348	6.01593e-05	1.08046	0.220755	0.341891	0.355518	0.0586097	1.61047	7.15892e-06	1.03535e-05	2.16444e-05	4.80313e-06	6.60587e-05	0.0162754	0.0466255	0.0745594	0.0965812	0.0665589
	GJ-1 17	0.0172683	18.4219	4.06722	6.29886	6.55073	4.30438e-05	1.07999	0.220758	0.341884	0.355506	0.058607	1.61039	6.3402e-06	9.68175e-06	1.99883e-05	4.33187e-06	7.05201e-05
Session 2 (2021-1-11)	GJ-1 01	0.0142493	15.6335	3.44873	5.33549	5.54571	1.96804e-05	0.913175	0.220574	0.341254	0.354644	0.0583965	1.60782	6.78365e-06	1.11556e-05	1.85471e-05	3.74953e-06	6.75775e-05
	MUD 01	0.00454863	15.0113	3.31171	5.12375	5.32604	1.24596e-05	0.877045	0.220585	0.341294	0.354721	0.0584121	1.60809	8.2746e-06	1.20627e-05	2.08849e-05	3.58733e-06	6.64195e-05	-0.0263998	-0.0439944	-0.0552836	-0.125464	-0.0632832
	GJ-1 02	0.0143522	15.6936	3.46255	5.35788	5.56999	2.59658e-05	0.917433	0.220608	0.341364	0.354837	0.0584424	1.60845	6.78808e-06	9.85808e-06	1.90111e-05	3.81008e-06	7.32856e-05
	MUD 02	0.0047267	15.297	3.37511	5.22254	5.43003	4.30805e-05	0.894408	0.220613	0.341368	0.354901	0.0584535	1.60871	7.14959e-06	8.74469e-06	2.07406e-05	4.25525e-06	7.5516e-05	0.0294635	0.0289606	0.134913	0.14766	0.126912
	GJ-1 03	0.0144725	15.8471	3.49636	5.41001	5.62498	2.74454e-05	0.926469	0.220605	0.341354	0.35487	0.0584473	1.60862	7.99081e-06	1.11775e-05	2.09071e-05	4.24733e-06	5.86772e-05
	MUD 03	0.00481829	15.3713	3.39146	5.24758	5.45672	3.44278e-05	0.898815	0.22061	0.341356	0.354915	0.0584573	1.60879	7.17837e-06	9.96194e-06	1.94386e-05	3.43472e-06	6.18548e-05	-0.00811994	-0.010417	0.0323362	0.0278949	0.0243359
	GJ-1 04	0.0144171	15.8123	3.48893	5.39827	5.61367	4.4741e-05	0.924707	0.220619	0.341365	0.354937	0.058464	1.60882	6.16122e-06	1.05137e-05	2.37965e-05	4.76473e-06	8.8008e-05
	MUD 04	0.00791435	15.7117	3.46659	5.3639	5.5779	3.16813e-05	0.918732	0.22061	0.341365	0.354937	0.0584584	1.60889	7.29981e-06	1.11007e-05	1.95633e-05	4.07251e-06	5.85881e-05	-0.0123585	0.0491861	0.0394678	-0.0147645	0.0314675
	GJ-1 05	0.0143366	15.7493	3.47484	5.37637	5.59097	2.64136e-05	0.920898	0.220606	0.341331	0.35491	0.0584544	1.6088	6.63146e-06	9.0243e-06	1.83332e-05	3.43777e-06	6.18778e-05
	MUD 05	0.00494636	15.569	3.43533	5.31595	5.52789	2.61466e-05	0.910567	0.220625	0.34142	0.354976	0.0584709	1.60896	6.96423e-06	9.49441e-06	1.62635e-05	3.14703e-06	5.6863e-05	0.0390464	0.123508	0.105275	0.144344	0.0972742
	GJ-1 06	0.0145758	16.0572	3.54305	5.48287	5.70096	3.00736e-05	0.93908	0.220627	0.341424	0.354967	0.0584705	1.6089	7.40735e-06	1.02771e-05	1.93771e-05	4.13773e-06	6.18756e-05
	MUD 06	0.00469633	15.5905	3.44026	5.32387	5.53609	3.30324e-05	0.911981	0.220636	0.341445	0.355003	0.0584774	1.609	7.42925e-06	1.06624e-05	1.81753e-05	4.00681e-06	7.00338e-05	0.034605	0.0718781	0.0636183	0.0748307	0.0556177
	GJ-1 07	0.0144553	15.7802	3.48206	5.38831	5.60345	2.76264e-05	0.923063	0.22063	0.341416	0.354994	0.0584757	1.609	7.10996e-06	1.10248e-05	1.9998e-05	4.00125e-06	6.13484e-05
	MUD 07	0.00470235	15.5229	3.42525	5.30053	5.51278	1.32769e-05	0.908158	0.220628	0.341427	0.355059	0.0584862	1.60931	7.89146e-06	9.5171e-06	1.74881e-05	3.45923e-06	5.31108e-05	-0.0111287	0.0285179	0.111142	0.0717499	0.103141
	GJ-1 08	0.014479	15.8837	3.50486	5.42359	5.64078	3.08849e-05	0.929259	0.220631	0.341419	0.355045	0.0584884	1.60922	6.78984e-06	9.25612e-06	1.68157e-05	3.73814e-06	5.84417e-05
	MUD 08	0.00765193	15.912	3.51117	5.43327	5.65123	1.78512e-05	0.930992	0.220635	0.341419	0.355074	0.0584924	1.60933	6.47029e-06	9.62434e-06	1.71753e-05	3.77187e-06	5.72944e-05	0.0144151	3.56174e-05	0.0665345	0.0504216	0.0585339
	GJ-1 09	0.0145337	15.9235	3.51369	5.43725	5.6553	2.60421e-05	0.931673	0.220632	0.341418	0.355057	0.0584905	1.60927	5.80001e-06	9.93319e-06	1.79447e-05	3.59566e-06	6.13853e-05
	MUD 09	0.007698	15.98	3.52623	5.45664	5.67582	3.00138e-05	0.935063	0.22064	0.341429	0.355104	0.0584973	1.60943	7.46513e-06	1.02072e-05	1.71311e-05	3.37104e-06	5.49927e-05	0.0435328	0.0502588	0.0834428	0.0616859	0.0754421
	GJ-1 10	0.014787	16.1536	3.56437	5.51557	5.73737	2.60022e-05	0.945217	0.220629	0.341406	0.355092	0.0584968	1.60945	6.80599e-06	1.02451e-05	2.10108e-05	3.91041e-06	6.97022e-05
	MUD 10	0.00489411	15.9505	3.51977	5.44687	5.6659	3.01549e-05	0.933466	0.220641	0.341445	0.355134	0.0585049	1.60955	6.66684e-06	7.72336e-06	1.60556e-05	3.24572e-06	5.22642e-05	0.0474661	0.0865062	0.0936301	0.110415	0.0856294
	GJ-1 11	0.0147564	16.3274	3.60281	5.5752	5.79936	3.03592e-05	0.955405	0.220633	0.341425	0.35511	0.0585001	1.60951	6.33068e-06	8.34536e-06	1.72843e-05	3.70487e-06	5.32274e-05
	MUD 11	0.00498091	15.9555	3.52092	5.44863	5.66784	3.26559e-05	0.933808	0.220644	0.341452	0.355146	0.0585093	1.60959	7.04145e-06	1.08524e-05	1.96752e-05	4.25873e-06	6.29133e-05	0.0419721	0.0403617	0.0801621	0.113019	0.0721615
	GJ-1 12	0.0146729	16.2145	3.57798	5.53706	5.75971	3.82383e-05	0.94893	0.220638	0.34145	0.355126	0.0585053	1.60954	6.83243e-06	9.13913e-06	2.05534e-05	3.91513e-06	7.44977e-05
	MUD 12	0.00463537	15.6456	3.45265	5.34311	5.55826	2.92678e-05	0.915809	0.22065	0.341473	0.355174	0.0585148	1.60967	7.77435e-06	9.12615e-06	1.94831e-05	4.27119e-06	6.09413e-05	0.0443592	0.0512688	0.10586	0.130695	0.0978595
	GJ-1 13	0.0147011	16.2198	3.57922	5.53911	5.76205	3.43375e-05	0.949333	0.220643	0.341461	0.355148	0.058509	1.6096	6.7331e-06	1.03813e-05	1.92544e-05	3.78323e-06	6.65167e-05
	MUD 13	0.00471884	16.0073	3.53246	5.46673	5.68696	3.32052e-05	0.937008	0.220651	0.341476	0.35519	0.0585191	1.60974	7.27511e-06	8.67269e-06	1.98533e-05	3.68125e-06	6.46925e-05	0.0304434	0.0103509	0.092071	0.117545	0.0840702
	GJ-1 14	0.0146725	16.1686	3.56807	5.52209	5.74417	2.80925e-05	0.946429	0.220646	0.341485	0.355168	0.0585155	1.60967	8.05766e-06	9.41456e-06	2.03492e-05	4.17814e-06	6.24469e-05
	MUD 14	0.00512684	16.2555	3.58738	5.55206	5.77543	3.55824e-05	0.951602	0.220659	0.341508	0.355202	0.0585228	1.60973	6.97158e-06	9.10006e-06	1.53988e-05	3.36791e-06	5.01561e-05	0.0344199	0.0317288	0.072225	0.0731781	0.0642244
	GJ-1 15	0.0146296	16.0802	3.54871	5.49223	5.71282	3.06333e-05	0.9413	0.220658	0.341509	0.355186	0.0585216	1.60967	7.08612e-06	9.62749e-06	1.66194e-05	3.13428e-06	4.33715e-05
	MUD 15	0.00489076	16.0434	3.54066	5.48017	5.70029	3.49171e-05	0.939322	0.220662	0.341539	0.355208	0.0585285	1.60974	6.47964e-06	8.41688e-06	1.51812e-05	3.48767e-06	5.86398e-05	-0.00194467	0.0318572	0.0462061	0.0847931	0.0382057
	GJ-1 16	0.0147346	16.1982	3.57486	5.5331	5.75506	3.16851e-05	0.948299	0.220667	0.341547	0.355196	0.0585255	1.60965	7.66375e-06	8.99445e-06	1.78024e-05	3.39003e-06	7.03064e-05
	MUD 16	0.00734877	16.1114	3.55592	5.50408	5.7248	4.14959e-05	0.943332	0.220682	0.341591	0.355245	0.0585345	1.60976	6.48666e-06	1.06951e-05	1.8914e-05	3.35967e-06	6.39007e-05	0.0685722	0.0953499	0.102239	0.131455	0.0942378
	GJ-1 17	0.0148469	16.3578	3.61005	5.58794	5.81196	2.87545e-05	0.95767	0.220666	0.341569	0.355221	0.0585281	1.60977	6.9888e-06	9.02398e-06	1.70068e-05	3.86395e-06	5.99534e-05
Session 3 (2021-1-12)	GJ-1 01	0.0188846	20.7807	4.58701	7.10332	7.381	1.55346e-05	1.21694	0.220709	0.341781	0.355106	0.0585378	1.60893	6.73967e-06	9.36926e-06	1.72863e-05	3.2942e-06	5.69618e-05
	MUD 01	0.00675956	19.7206	4.35323	6.74188	7.00606	1.67669e-05	1.15525	0.22072	0.341827	0.355184	0.0585518	1.6092	6.69902e-06	9.25026e-06	1.68028e-05	2.82687e-06	5.49308e-05	0.0210211	0.0331296	0.0491399	0.0140374	0.0411395
	GJ-1 02	0.018232	19.9723	4.40894	6.8283	7.09624	2.47343e-05	1.17018	0.220723	0.341851	0.355227	0.0585642	1.60938	6.16332e-06	1.01623e-05	1.84243e-05	3.57049e-06	6.17059e-05
	MUD 02	0.00697261	19.9148	4.39641	6.80893	7.07661	2.8022e-05	1.16698	0.220732	0.341866	0.355261	0.058571	1.60947	6.15619e-06	9.40481e-06	1.66774e-05	3.26234e-06	5.17113e-05	0.0240135	0.0343564	0.0647766	0.0830658	0.0567761
	GJ-1 03	0.0182622	20.0863	4.43422	6.86748	7.13728	1.87939e-05	1.17694	0.220731	0.341857	0.355248	0.0585682	1.60942	6.66771e-06	7.9494e-06	1.97321e-05	3.37579e-06	6.16937e-05
	MUD 03	0.00784154	19.671	4.34273	6.7259	6.99044	2.06285e-05	1.15279	0.220742	0.341881	0.355289	0.0585775	1.60952	5.93746e-06	8.92542e-06	1.68628e-05	3.58528e-06	5.48704e-05	0.0349248	0.0486778	0.0746193	0.106211	0.0666187
	GJ-1 04	0.0180011	19.837	4.37927	6.78258	7.04938	8.10417e-06	1.16246	0.220737	0.341871	0.355276	0.0585744	1.6095	6.5386e-06	9.15776e-06	1.91347e-05	3.51921e-06	6.47315e-05
	MUD 04	0.00641901	19.5737	4.32135	6.69321	6.95674	1.26784e-05	1.14723	0.220744	0.341903	0.355328	0.0585856	1.60968	6.54932e-06	8.84231e-06	1.60944e-05	3.37581e-06	5.3039e-05	0.0233142	0.0635499	0.0965652	0.145681	0.0885644
	GJ-1 05	0.0179568	19.8308	4.37799	6.78076	7.04774	2.67e-05	1.16218	0.220741	0.341892	0.355311	0.0585797	1.60963	6.50293e-06	7.50333e-06	1.5891e-05	2.46117e-06	5.11236e-05
	MUD 05	0.0075385	19.2536	4.25075	6.58375	6.84341	9.75186e-06	1.12853	0.220751	0.341911	0.355355	0.0585899	1.60976	6.7426e-06	9.40733e-06	1.80196e-05	3.36481e-06	5.58794e-05	0.0260717	0.0352897	0.0679542	0.0858171	0.0599536
	GJ-1 06	0.0175846	19.475	4.29963	6.65946	6.9221	1.42528e-05	1.14151	0.220749	0.341907	0.355351	0.0585901	1.60975	7.1918e-06	1.11553e-05	1.74106e-05	3.56872e-06	5.5203e-05
	MUD 06	0.00658475	19.1275	4.22305	6.5411	6.79964	1.33116e-05	1.12139	0.220758	0.341937	0.355414	0.0586042	1.60997	7.58979e-06	9.4701e-06	1.97538e-05	3.41473e-06	6.28154e-05	0.0256366	0.0531109	0.124949	0.155812	0.116948
	GJ-1 07	0.0177706	19.5463	4.31554	6.68427	6.94831	2.60269e-05	1.14589	0.220756	0.34193	0.355389	0.0586001	1.60988	7.20104e-06	9.60825e-06	1.80384e-05	3.44187e-06	5.88142e-05
	MUD 07	0.0065089	19.3136	4.26431	6.60522	6.86667	1.93429e-05	1.13245	0.220768	0.34196	0.355452	0.0586113	1.61007	6.92303e-06	1.10667e-05	2.1893e-05	4.39998e-06	7.17934e-05	0.0328237	0.062633	0.114995	0.113418	0.106995
	GJ-1 08	0.0175879	19.4668	4.29812	6.65746	6.92078	8.20513e-06	1.14139	0.220766	0.341948	0.355432	0.0586092	1.60999	7.39917e-06	9.33803e-06	1.61266e-05	2.91554e-06	5.23024e-05
	MUD 08	0.00628475	19.0349	4.20279	6.51011	6.76806	2.20345e-05	1.11628	0.220767	0.341972	0.355481	0.0586196	1.61021	7.1129e-06	7.78532e-06	1.68016e-05	3.10627e-06	5.6517e-05	0.00299711	0.0494233	0.0967656	0.121518	0.0887648
	GJ-1 09	0.0173659	19.1851	4.23596	6.5614	6.82119	2.15259e-05	1.12501	0.220766	0.341962	0.355462	0.0586159	1.61013	6.2912e-06	9.4174e-06	1.71603e-05	2.70986e-06	5.25798e-05
	MUD 09	0.00604434	19.2069	4.24085	6.56904	6.82973	1.66968e-05	1.1264	0.220771	0.341968	0.355496	0.0586204	1.61025	6.8489e-06	9.00738e-06	1.83865e-05	3.15881e-06	5.80611e-05	0.00748719	0.000890284	0.0531733	0.00515789	0.0451728
	GJ-1 10	0.0174579	19.2171	4.24307	6.57252	6.83304	1.7594e-05	1.12702	0.220772	0.341974	0.355492	0.0586243	1.61022	6.94479e-06	1.1394e-05	1.95708e-05	3.29224e-06	6.49894e-05
	MUD 10	0.00745505	19.0163	4.19893	6.50428	6.76248	1.74613e-05	1.11541	0.220779	0.341998	0.355531	0.0586311	1.61035	6.45049e-06	9.02104e-06	1.54523e-05	3.44594e-06	5.10661e-05	0.0284527	0.0470941	0.082016	0.113082	0.0740154
	GJ-1 11	0.0171538	19.1248	4.22277	6.54131	6.80069	1.26323e-05	1.12168	0.220772	0.341991	0.355511	0.0586246	1.61031	6.03295e-06	8.67633e-06	1.79266e-05	3.1474e-06	5.99378e-05
	MUD 11	0.00661199	18.8002	4.15115	6.43026	6.68553	2.26111e-05	1.10266	0.220773	0.341988	0.355521	0.0586258	1.61035	6.71839e-06	9.17849e-06	1.82961e-05	4.02376e-06	5.93631e-05	-0.00411433	-0.014304	-0.00139287	-0.0326741	-0.00939286
	GJ-1 12	0.0169757	18.9152	4.17651	6.46964	6.72649	2.37993e-05	1.10946	0.220775	0.341995	0.355532	0.0586308	1.61038	5.59267e-06	8.79895e-06	1.85119e-05	3.43009e-06	6.715e-05
	MUD 12	0.00641141	18.9922	4.19362	6.4963	6.75451	2.50898e-05	1.11409	0.220779	0.342006	0.355561	0.0586362	1.61049	7.03442e-06	8.96917e-06	1.67571e-05	2.67639e-06	4.93731e-05	0.012454	0.0328018	0.0778449	0.0934935	0.0698443
	GJ-1 13	0.0169741	18.9167	4.17692	6.47017	6.72717	1.73631e-05	1.10957	0.220777	0.341995	0.355535	0.0586306	1.61038	7.04723e-06	1.07854e-05	2.28038e-05	4.56312e-06	7.63059e-05
	MUD 13	0.00645316	18.7889	4.14878	6.42686	6.68243	2.65152e-05	1.10216	0.220782	0.342012	0.355568	0.0586364	1.61049	7.78674e-06	1.07216e-05	2.03323e-05	3.99776e-06	6.47757e-05	0.0154424	0.0247694	0.0367064	0.0321405	0.0287061
	GJ-1 14	0.0170216	18.9196	4.17762	6.47157	6.72901	2.16363e-05	1.10983	0.22078	0.342012	0.355574	0.0586385	1.61054	6.66116e-06	9.35208e-06	1.74245e-05	3.2207e-06	5.93543e-05
	MUD 14	0.00664292	18.6977	4.12868	6.39574	6.65044	2.18046e-05	1.09689	0.220783	0.342013	0.355588	0.058639	1.61058	7.06024e-06	9.02391e-06	1.63543e-05	3.00085e-06	4.86339e-05	0.0019916	-0.012665	0.0326416	0.0155962	0.0246413
	GJ-1 15	0.0169254	18.7965	4.15053	6.42966	6.68536	2.01897e-05	1.10265	0.220784	0.342022	0.355579	0.0586378	1.61053	7.35721e-06	9.4608e-06	1.80733e-05	3.77324e-06	5.27292e-05
	MUD 15	0.00726727	18.6639	4.12135	6.3846	6.63886	2.47572e-05	1.09504	0.220791	0.342036	0.355612	0.0586463	1.61063	6.20349e-06	9.25193e-06	1.66377e-05	3.36984e-06	5.7694e-05	0.0304384	0.0409326	0.0657819	0.0922524	0.0577814
	GJ-1 16	0.0167531	18.5715	4.1008	6.35266	6.60564	2.91544e-05	1.08956	0.220784	0.342022	0.355599	0.058644	1.61062	7.95525e-06	1.15589e-05	1.98341e-05	3.23248e-06	5.72973e-05
	MUD 16	0.00566194	18.3736	4.05722	6.28537	6.53598	1.714e-05	1.07808	0.220794	0.342042	0.355643	0.0586522	1.61074	6.80349e-06	8.54598e-06	1.65095e-05	3.15761e-06	5.09403e-05	0.0304489	0.0447601	0.121439	0.127818	0.113438
	GJ-1 17	0.0168098	18.6891	4.1269	6.39313	6.64754	2.21298e-05	1.09645	0.220792	0.342031	0.3556	0.0586454	1.61056	7.33073e-06	9.43617e-06	1.91239e-05	3.82358e-06	5.79402e-05
Session 4 (2021-1-12)	GJ-1 01	0.0175726	19.8467	4.38241	6.78894	7.0591	1.76275e-05	1.16427	0.220785	0.342025	0.355584	0.0586419	1.61054	6.85329e-06	9.13656e-06	1.80266e-05	3.00744e-06	5.7397e-05
	MUD 01	0.00638902	18.5283	4.09146	6.33837	6.59118	1.53043e-05	1.08719	0.220792	0.342048	0.355645	0.0586541	1.61077	6.53121e-06	8.87097e-06	1.67116e-05	3.43879e-06	5.44997e-05	0.018648	0.0448197	0.119106	0.140347	0.111105
	GJ-1 02	0.0166244	18.7244	4.13467	6.40525	6.66037	2.14669e-05	1.09857	0.22079	0.34204	0.355621	0.0586499	1.61068	7.62741e-06	9.19317e-06	1.66315e-05	3.40429e-06	5.03017e-05
	MUD 02	0.0068362	18.7289	4.13578	6.40702	6.66254	2.27385e-05	1.09894	0.220796	0.342045	0.355643	0.0586528	1.61073	6.1855e-06	1.03587e-05	1.9844e-05	3.99784e-06	6.39799e-05	0.0302331	0.0204642	0.0560381	0.0435088	0.0480377
	GJ-1 03	0.0163216	18.4382	4.0715	6.30738	6.55881	1.4275e-05	1.08182	0.22079	0.342036	0.355625	0.0586507	1.6107	6.43006e-06	1.0244e-05	1.84364e-05	2.85608e-06	6.19722e-05
	MUD 03	0.00719905	18.6149	4.11056	6.36808	6.62229	1.11785e-05	1.09229	0.220794	0.342056	0.355664	0.0586561	1.61084	6.33229e-06	8.78972e-06	1.80494e-05	3.24829e-06	6.07737e-05	0.02653	0.0585436	0.145474	0.11327	0.137472
	GJ-1 04	0.016198	18.3302	4.04759	6.27041	6.52009	3.14148e-05	1.07548	0.220786	0.342037	0.355599	0.0586482	1.61061	6.81063e-06	1.06516e-05	1.90813e-05	3.2492e-06	6.32486e-05
	MUD 04	0.00574946	18.6069	4.10886	6.36542	6.61967	1.90515e-05	1.0919	0.220797	0.342057	0.355672	0.0586591	1.61086	6.23784e-06	8.5143e-06	1.68288e-05	3.60566e-06	6.75602e-05	0.0343761	0.0588866	0.171579	0.172276	0.163577
	GJ-1 05	0.0159399	18.1035	3.99772	6.193	6.43989	1.70659e-05	1.06222	0.220793	0.342037	0.355623	0.0586499	1.61066	6.14411e-06	1.08005e-05	1.8754e-05	3.75471e-06	7.27797e-05
	MUD 05	0.00713098	18.4082	4.06502	6.29766	6.5491	1.80996e-05	1.08026	0.220801	0.342069	0.355684	0.0586604	1.61088	7.32642e-06	9.65009e-06	2.08934e-05	4.25745e-06	6.53829e-05	0.0504026	0.0879967	0.162998	0.181601	0.154997
	GJ-1 06	0.0160208	18.1814	4.01477	6.21972	6.46781	2.50823e-05	1.06682	0.220787	0.342041	0.355629	0.0586495	1.61073	6.64533e-06	1.05748e-05	2.02045e-05	4.13096e-06	6.69753e-05
	MUD 06	0.00647709	18.1864	4.01613	6.22196	6.47051	1.668e-05	1.06738	0.220803	0.342083	0.355707	0.0586694	1.61097	6.86562e-06	1.03888e-05	1.82775e-05	3.4322e-06	5.9436e-05	0.0500433	0.105591	0.17577	0.269734	0.167769
	GJ-1 07	0.0161912	18.2607	4.03247	6.24697	6.49627	1.78891e-05	1.07153	0.220798	0.342053	0.35566	0.0586577	1.6108	7.81794e-06	1.03583e-05	1.97896e-05	3.2885e-06	5.97799e-05
	MUD 07	0.0062222	18.2755	4.03575	6.25243	6.5023	1.60675e-05	1.07263	0.220801	0.342075	0.355701	0.0586679	1.61096	7.05617e-06	1.07988e-05	1.98132e-05	3.71653e-06	6.52057e-05	0.0228138	0.0632483	0.117836	0.159312	0.109835
	GJ-1 08	0.0159926	18.1286	4.00322	6.20187	6.44949	1.7243e-05	1.06384	0.220793	0.342052	0.355658	0.0586594	1.61082	6.82209e-06	9.71905e-06	2.04702e-05	3.86542e-06	7.13183e-05
	MUD 08	0.00563159	17.9998	3.97505	6.15817	6.40441	2.36995e-05	1.05646	0.22081	0.34208	0.355714	0.05867	1.61095	7.95418e-06	1.12732e-05	1.93874e-05	4.88152e-06	5.56078e-05	0.0807474	0.073934	0.164124	0.189279	0.156122
	GJ-1 09	0.0160166	18.0909	3.99496	6.18906	6.43618	2.21451e-05	1.06165	0.220791	0.342057	0.355653	0.0586583	1.61081	7.1139e-06	9.1652e-06	1.82259e-05	3.16749e-06	5.61294e-05
	MUD 09	0.00553272	18.119	4.00131	6.19917	6.44712	2.7644e-05	1.06353	0.220806	0.342094	0.355728	0.0586747	1.61104	5.82384e-06	9.28739e-06	1.84336e-05	3.79984e-06	7.10611e-05	0.0355834	0.081912	0.133494	0.201809	0.125493
	GJ-1 10	0.0162797	18.3627	4.05508	6.2822	6.53333	2.45592e-05	1.0777	0.220805	0.342075	0.355708	0.0586675	1.61096	7.2744e-06	9.74935e-06	1.69743e-05	3.15062e-06	5.45559e-05
	MUD 10	0.00694512	18.2158	4.02275	6.23226	6.48156	2.86426e-05	1.06916	0.220807	0.342089	0.355728	0.0586717	1.61103	6.60312e-06	1.06834e-05	2.14913e-05	4.07257e-06	7.19141e-05	0.0331887	0.0410518	0.0827701	0.121348	0.0747694
	GJ-1 11	0.0157547	17.9606	3.96618	6.14464	6.39011	1.09944e-05	1.05401	0.220796	0.342074	0.355689	0.0586617	1.61094	7.9404e-06	1.14714e-05	2.35729e-05	4.49601e-06	7.55818e-05
	MUD 11	0.00675189	17.8301	3.93769	6.10046	6.34452	1.91018e-05	1.04659	0.220817	0.342101	0.355743	0.0586762	1.61104	7.29812e-06	9.94476e-06	1.88983e-05	4.31162e-06	6.12833e-05	0.102792	0.0912019	0.146775	0.224041	0.138774
	GJ-1 12	0.0156501	17.8457	3.94078	6.10536	6.34942	1.44003e-05	1.04736	0.220792	0.342066	0.355693	0.0586644	1.61098	6.51709e-06	1.00688e-05	1.78406e-05	3.7686e-06	5.6367e-05
	MUD 12	0.00616987	18.0653	3.98962	6.18099	6.42841	2.35289e-05	1.06038	0.220816	0.342101	0.355749	0.0586738	1.61107	6.77415e-06	9.7067e-06	1.95468e-05	3.35302e-06	6.20678e-05	0.088748	0.0738373	0.139793	0.145413	0.131792
	GJ-1 13	0.015726	17.8989	3.95268	6.12386	6.36858	2.40142e-05	1.05049	0.2208	0.342086	0.355706	0.0586662	1.61098	6.99316e-06	9.3386e-06	1.74513e-05	2.92451e-06	5.83924e-05
	MUD 13	0.00615611	17.8556	3.94321	6.10937	6.35398	2.30129e-05	1.04817	0.220809	0.342107	0.355761	0.0586794	1.61117	7.67195e-06	1.04757e-05	1.94272e-05	3.77897e-06	7.24083e-05	0.0345855	0.0583495	0.135614	0.152789	0.127613
	GJ-1 14	0.015772	17.9262	3.9587	6.13313	6.37841	1.52983e-05	1.05219	0.220803	0.342088	0.355719	0.0586747	1.61103	6.46963e-06	7.9654e-06	1.77705e-05	3.16603e-06	6.14878e-05
	MUD 14	0.00685053	17.8406	3.93977	6.10413	6.34842	1.47216e-05	1.04723	0.220806	0.342102	0.355749	0.058678	1.61114	7.15551e-06	1.00334e-05	1.90794e-05	3.96521e-06	5.94024e-05	-0.000397454	0.0233281	0.0718616	0.0535268	0.063861
	GJ-1 15	0.0157398	17.8524	3.94253	6.10811	6.35232	2.49181e-05	1.04788	0.220809	0.342101	0.355727	0.0586751	1.61102	6.94404e-06	9.68074e-06	1.79082e-05	3.66087e-06	5.31137e-05
	MUD 15	0.00676049	17.9322	3.96013	6.13548	6.38135	1.94473e-05	1.05267	0.22081	0.342097	0.355754	0.0586776	1.61113	7.4976e-06	1.08553e-05	2.09793e-05	3.78847e-06	6.7655e-05	0.00246752	-0.0217493	0.0446413	0.0205346	0.036641
	GJ-1 16	0.0159992	18.0865	3.99422	6.18833	6.43592	2.21275e-05	1.06168	0.22081	0.342108	0.355748	0.0586776	1.61111	6.05326e-06	8.10902e-06	1.53771e-05	2.93392e-06	5.38979e-05
	MUD 16	0.00533134	17.5337	3.87222	5.99928	6.23963	1.30755e-05	1.02932	0.220816	0.342111	0.355772	0.0586825	1.61117	6.7627e-06	1.04878e-05	2.08447e-05	3.5956e-06	6.3396e-05	0.0446571	0.0326794	0.126275	0.128626	0.118274
	GJ-1 17	0.0155768	17.6744	3.90314	6.0472	6.28885	2.33262e-05	1.03743	0.220803	0.342092	0.355707	0.0586723	1.61097	6.89028e-06	1.16431e-05	2.15129e-05	4.61588e-06	7.0518e-05
Session 5 (2021-1-19)	GJ-1 01	0.0172218	19.6915	4.3412	6.71643	6.96349	9.19302e-06	1.14559	0.22046	0.34108	0.353623	0.0581761	1.60403	8.49002e-06	1.35643e-05	2.6385e-05	4.76271e-06	8.89547e-05
	MUD 01	0.00649667	20.2567	4.46604	6.90972	7.16411	3.30896e-05	1.17867	0.220471	0.341104	0.353659	0.0581857	1.60411	8.43825e-06	1.28394e-05	2.46879e-05	4.66525e-06	8.12889e-05	0.0360299	0.0474758	0.071974	0.131975	0.0639734
	GJ-1 02	0.0177224	20.174	4.44769	6.88133	7.13453	6.03172e-06	1.17374	0.220466	0.341097	0.353645	0.05818	1.60408	8.01316e-06	1.19088e-05	2.38162e-05	4.24083e-06	7.81594e-05
	MUD 02	0.0066574	19.9962	4.40861	6.82064	7.07184	1.07343e-05	1.16347	0.220472	0.341095	0.353653	0.0581837	1.60408	9.4369e-06	1.19498e-05	2.64866e-05	4.41481e-06	8.48133e-05	0.00389698	-0.00291715	0.0270189	0.0612145	0.0190187
	GJ-1 03	0.0176931	20.1645	4.44579	6.87805	7.13112	2.99797e-06	1.17319	0.220476	0.341095	0.353642	0.0581802	1.604	8.23404e-06	1.32028e-05	2.48024e-05	4.08464e-06	8.00812e-05
	MUD 03	0.007731	20.2961	4.47467	6.92325	7.17791	2.16844e-05	1.18095	0.220468	0.341109	0.353652	0.058185	1.60409	8.64221e-06	1.31862e-05	2.87465e-05	4.22132e-06	8.93135e-05	-0.0206801	0.0313983	0.0184726	0.0528026	0.0104724
	GJ-1 04	0.017779	20.2918	4.47375	6.92161	7.17625	1.59049e-05	1.18066	0.22047	0.341102	0.353649	0.0581836	1.60406	8.98302e-06	1.19842e-05	2.15282e-05	3.85078e-06	6.85461e-05
	MUD 04	0.00708705	20.2383	4.46189	6.90329	7.15728	1.64801e-05	1.17756	0.220467	0.341098	0.353644	0.0581835	1.60407	7.39053e-06	1.2045e-05	2.34908e-05	4.9587e-06	8.53004e-05	-0.0187139	-0.00917825	-0.0203146	-0.0241699	-0.0283145
	GJ-1 05	0.017787	20.3116	4.47815	6.92834	7.18339	2.85122e-06	1.18187	0.220472	0.3411	0.353655	0.0581862	1.60408	7.93141e-06	1.13286e-05	2.44907e-05	4.10011e-06	7.7103e-05
	MUD 05	0.0078542	20.3168	4.47934	6.92992	7.18509	3.14608e-06	1.18208	0.220473	0.34109	0.353646	0.0581813	1.60403	8.7107e-06	1.19737e-05	2.61051e-05	4.21697e-06	8.08243e-05	0.00739738	-0.0196785	-0.0159406	-0.0262158	-0.0239405
	GJ-1 06	0.0177209	20.2333	4.46089	6.90148	7.1556	9.76631e-07	1.17719	0.220472	0.341093	0.353649	0.0581795	1.60406	8.83988e-06	1.10445e-05	2.57417e-05	4.67896e-06	7.98275e-05
	MUD 06	0.00724758	20.0023	4.40998	6.82283	7.07388	8.06103e-06	1.16378	0.220473	0.3411	0.353648	0.0581811	1.60405	8.90749e-06	1.35613e-05	2.64371e-05	4.74399e-06	8.31706e-05	0.0206335	0.0200642	0.00279521	0.0439891	-0.00520481
	GJ-1 07	0.0177784	20.2266	4.45926	6.89921	7.15316	6.94348e-06	1.17675	0.220464	0.341093	0.353646	0.0581776	1.6041	7.62131e-06	1.1516e-05	2.20063e-05	3.69555e-06	7.45801e-05
	MUD 07	0.00641392	19.9763	4.40409	6.81396	7.0647	1.61847e-05	1.16234	0.220465	0.341099	0.353648	0.0581849	1.6041	9.15167e-06	1.30785e-05	2.59574e-05	5.12512e-06	7.12796e-05	-0.000879375	0.0240806	0.0213492	0.141591	0.013349
	GJ-1 08	0.0175874	20.0936	4.42998	6.85376	7.10592	9.31376e-06	1.16898	0.220465	0.341088	0.353635	0.0581757	1.60404	9.44129e-06	1.30732e-05	2.51565e-05	4.59206e-06	6.94553e-05
	MUD 08	0.00665224	20.1624	4.44522	6.87749	7.1302	3.58075e-06	1.17306	0.220469	0.341102	0.353633	0.0581794	1.604	8.83678e-06	1.28234e-05	2.2997e-05	4.11422e-06	6.94645e-05	0.00982501	0.0387619	-0.00681776	0.0409265	-0.0148177
	GJ-1 09	0.0176786	20.1404	4.44035	6.8697	7.12244	8.7251e-06	1.17175	0.220468	0.341088	0.353635	0.0581784	1.60402	1.03226e-05	1.31967e-05	2.60354e-05	4.2959e-06	7.1651e-05
	MUD 09	0.00641465	20.098	4.43094	6.85547	7.10756	1.30841e-05	1.16931	0.220466	0.341099	0.353639	0.0581789	1.60405	8.828e-06	1.38573e-05	2.73158e-05	5.07113e-06	8.95704e-05	-0.00687668	0.024927	0.00801287	0.00471594	1.28103e-05
	GJ-1 10	0.0176739	20.1016	4.43174	6.85655	7.10879	1.7739e-05	1.16951	0.220466	0.341092	0.353637	0.0581788	1.60404	9.91518e-06	1.33429e-05	2.65598e-05	5.13289e-06	8.09505e-05
	MUD 10	0.00642811	19.9324	4.39447	6.7988	7.04891	7.82071e-06	1.15965	0.220468	0.341091	0.353636	0.0581782	1.60402	9.30631e-06	1.0723e-05	2.23709e-05	4.27905e-06	7.46641e-05	-0.00514857	0.000628404	-0.0035315	-0.0102041	-0.0115315
	GJ-1 11	0.0174997	19.923	4.39249	6.79558	7.04565	1.27025e-05	1.15912	0.220473	0.341089	0.353638	0.0581787	1.604	9.38562e-06	1.29229e-05	2.53194e-05	4.50329e-06	7.79217e-05
	MUD 11	0.00666123	20.1486	4.44214	6.87265	7.1255	5.23547e-06	1.17228	0.220469	0.341096	0.353642	0.0581812	1.60405	1.03757e-05	1.28459e-05	2.71318e-05	4.53359e-06	8.15753e-05	-0.00750736	0.00104344	-0.000967686	0.0265768	-0.00896768
	GJ-1 12	0.01764	20.1585	4.44431	6.87616	7.12905	1.19789e-05	1.17285	0.220468	0.341103	0.353646	0.0581806	1.60407	8.33924e-06	1.3044e-05	2.48356e-05	3.95956e-06	7.28461e-05
	MUD 12	0.0079727	20.3511	4.48685	6.94208	7.19775	9.28043e-06	1.18419	0.22047	0.341112	0.353672	0.0581867	1.60417	9.18919e-06	1.23907e-05	2.57255e-05	4.75767e-06	7.91882e-05	0.00982599	0.0397565	0.0872288	0.130018	0.0792281
	GJ-1 13	0.017625	20.1197	4.43577	6.86276	7.11516	6.44127e-06	1.17053	0.220468	0.341094	0.353636	0.0581776	1.60403	9.25643e-06	1.11411e-05	2.29082e-05	3.81354e-06	6.93842e-05
	MUD 13	0.00647958	19.8445	4.37508	6.76891	7.01762	1.71232e-06	1.15448	0.220467	0.341096	0.353625	0.0581756	1.60398	9.92872e-06	1.24492e-05	2.75316e-05	4.53877e-06	8.67043e-05	0.000457882	-1.46242e-05	-0.0354827	-0.0503239	-0.0434824
	GJ-1 14	0.0177595	20.2824	4.47159	6.91831	7.17277	1.43707e-05	1.18003	0.220466	0.341097	0.353639	0.0581793	1.60406	8.98741e-06	1.44522e-05	2.71857e-05	3.80012e-06	8.28944e-05
	MUD 14	0.00595578	20.0182	4.41342	6.82822	7.0794	1.53278e-05	1.16467	0.22047	0.341098	0.353642	0.0581793	1.60404	8.17196e-06	1.19512e-05	2.41421e-05	3.53714e-06	7.93526e-05	0.00921956	-0.00334368	-0.0206334	-0.0218165	-0.0286332
	GJ-1 15	0.0183462	20.8826	4.60401	7.12313	7.38547	-4.4286e-06	1.21501	0.22047	0.341101	0.35366	0.0581818	1.60412	8.98331e-06	1.19302e-05	2.64277e-05	4.77871e-06	8.00398e-05
	MUD 15	0.00642231	20.1382	4.43982	6.86914	7.12182	8.01476e-06	1.17157	0.220466	0.341097	0.353641	0.0581751	1.60406	8.12603e-06	1.2012e-05	2.3514e-05	5.09851e-06	8.16001e-05	-0.0107918	-0.013711	-0.0361134	-0.11912	-0.0441131
	GJ-1 16	0.0180797	20.5572	4.53221	7.01215	7.27011	4.01727e-06	1.19608	0.220467	0.341103	0.353648	0.0581823	1.60408	1.00142e-05	1.26301e-05	2.70892e-05	4.16017e-06	7.832e-05
	MUD 16	0.00698851	20.2898	4.47327	6.92114	7.17586	7.1169e-06	1.18061	0.220468	0.34111	0.353661	0.0581864	1.60414	7.4508e-06	1.30024e-05	2.54609e-05	3.6875e-06	8.68397e-05	0.0147768	0.0528249	0.0775804	0.129173	0.0695798
	GJ-1 17	0.0179473	20.4695	4.51277	6.98184	7.23855	9.09939e-06	1.19085	0.220462	0.341082	0.353619	0.0581756	1.60399	8.59704e-06	1.23277e-05	2.66887e-05	4.21618e-06	8.77528e-05
Session 6 (2021-1-19)	GJ-1 01	0.0168531	19.2223	4.23798	6.55676	6.79783	3.74844e-06	1.11841	0.220471	0.3411	0.353639	0.0581828	1.60401	7.51989e-06	1.06963e-05	2.06998e-05	3.49962e-06	6.8831e-05
	MUD 01	0.00645487	19.7772	4.36036	6.74637	6.9951	2.2843e-05	1.15091	0.220473	0.341117	0.353688	0.0581927	1.60423	8.76001e-06	1.26683e-05	2.59794e-05	4.74278e-06	8.01822e-05	0.0137025	0.0629153	0.141577	0.220592	0.141577
	GJ-1 02	0.0174245	19.8007	4.36544	6.75383	7.00233	1.03723e-05	1.15196	0.220468	0.34109	0.353637	0.058177	1.60403	1.00868e-05	1.23963e-05	2.55307e-05	4.4206e-06	6.82231e-05
	MUD 02	0.00784854	19.883	4.38355	6.78248	7.03223	5.84428e-06	1.15695	0.220466	0.341117	0.353673	0.058187	1.6042	8.13307e-06	1.18321e-05	2.82287e-05	4.15406e-06	9.06622e-05	-0.00652497	0.0634786	0.0876747	0.13897	0.0876747
	GJ-1 03	0.0171766	19.5505	4.31024	6.6687	6.91404	1.32179e-05	1.13748	0.220467	0.341101	0.353646	0.0581809	1.60408	9.62337e-06	1.08425e-05	2.39855e-05	4.29777e-06	7.0691e-05
	MUD 03	0.00666624	20	4.40939	6.82203	7.07318	4.16373e-06	1.16372	0.220468	0.341099	0.353653	0.058185	1.6041	9.58442e-06	1.29619e-05	2.76329e-05	4.25244e-06	8.41764e-05	0.000126174	-0.00292339	0.0207092	0.0533747	0.0207092
	GJ-1 04	0.01737	19.841	4.37434	6.76775	7.01672	3.05869e-06	1.15442	0.22047	0.341099	0.353644	0.0581828	1.60405	9.56827e-06	1.03068e-05	2.32041e-05	3.79315e-06	7.44642e-05
	MUD 04	0.00650251	20.0285	4.41569	6.83179	7.08363	-9.85619e-07	1.1654	0.220469	0.3411	0.353671	0.0581858	1.60418	8.94871e-06	1.17518e-05	2.5251e-05	4.42108e-06	7.44342e-05	-0.00393104	-0.00369045	0.0755399	0.0779328	0.0755399
	GJ-1 05	0.0175246	20.0247	4.41484	6.83054	7.08173	-1.53509e-06	1.16505	0.220469	0.341104	0.353645	0.0581798	1.60406	9.79668e-06	1.35174e-05	2.41665e-05	4.08435e-06	7.83022e-05
	MUD 05	0.00674658	20.2972	4.47484	6.92344	7.1784	1.51271e-05	1.18092	0.220465	0.341101	0.353658	0.0581803	1.60414	9.61493e-06	1.17194e-05	2.49748e-05	4.11657e-06	8.44626e-05	-0.00595167	0.0117562	0.0435494	0.00532551	0.0435494
	GJ-1 06	0.0174467	19.9224	4.39218	6.79538	7.04545	1.00905e-05	1.1591	0.220464	0.34109	0.35364	0.0581802	1.60407	7.91118e-06	1.2636e-05	2.53522e-05	4.65597e-06	7.89236e-05
	MUD 06	0.00657967	20.2883	4.47305	6.9206	7.1755	9.01247e-06	1.18049	0.220474	0.341111	0.353671	0.0581848	1.60414	8.43705e-06	1.15159e-05	2.30421e-05	4.30183e-06	7.04225e-05	0.0312548	0.0347805	0.075319	0.038898	0.075319
	GJ-1 07	0.0177428	20.1788	4.44884	6.88322	7.13633	1.86906e-05	1.17412	0.220469	0.341108	0.353649	0.0581849	1.60407	8.0888e-06	1.13722e-05	2.22558e-05	4.1345e-06	7.71602e-05
	MUD 07	0.00574767	20.2157	4.45704	6.89588	7.14981	1.56082e-05	1.17631	0.220472	0.341112	0.353668	0.0581862	1.60414	9.27089e-06	1.25523e-05	2.72864e-05	5.18193e-06	8.33496e-05	0.0065022	0.0325954	0.060467	0.0485019	0.060467
	GJ-1 08	0.0177821	20.268	4.46854	6.9133	7.16779	2.32985e-05	1.17925	0.220472	0.341093	0.353645	0.0581818	1.60403	7.89444e-06	1.11306e-05	2.44431e-05	4.78625e-06	8.021e-05
	MUD 08	0.00847199	20.3902	4.4955	6.9553	7.21155	1.07615e-05	1.18649	0.220472	0.341107	0.353671	0.058188	1.60415	9.00895e-06	1.35831e-05	2.66347e-05	5.13228e-06	7.48359e-05	-0.00127332	0.0233467	0.0502579	0.0522303	0.0502579
	GJ-1 09	0.0176796	20.0932	4.43002	6.85392	7.10628	1.11421e-05	1.16919	0.220473	0.341105	0.353662	0.058188	1.60411	7.72153e-06	1.07588e-05	2.23328e-05	3.9437e-06	7.04463e-05
	MUD 09	0.00699616	20.2876	4.47293	6.92026	7.17556	7.94106e-06	1.18051	0.220475	0.341105	0.353685	0.0581875	1.6042	8.19756e-06	1.09769e-05	2.47255e-05	4.35233e-06	7.92574e-05	0.0179579	0.00116548	0.0718088	0.0301397	0.0718088
	GJ-1 10	0.0177136	20.1183	4.43548	6.8625	7.11509	1.48184e-05	1.17057	0.220469	0.341105	0.353658	0.0581835	1.60412	9.97888e-06	1.39639e-05	2.57221e-05	4.34227e-06	7.21494e-05
	MUD 10	0.00613355	20.1773	4.44858	6.88268	7.13626	1.87842e-05	1.17407	0.220474	0.341106	0.353671	0.0581864	1.60414	8.92513e-06	1.45029e-05	2.61271e-05	4.50242e-06	7.87536e-05	0.0289461	0.00420982	0.0270591	0.0447845	0.0270591
	GJ-1 11	0.0176609	20.0824	4.4275	6.85024	7.10255	1.07469e-05	1.16849	0.220466	0.341105	0.353666	0.0581841	1.60417	6.94848e-06	1.19789e-05	2.16303e-05	4.3503e-06	7.74504e-05
	MUD 11	0.00736426	19.9506	4.39863	6.80534	7.05609	1.27898e-05	1.16081	0.220475	0.341107	0.353673	0.0581836	1.60414	7.67981e-06	1.22939e-05	2.46229e-05	4.07952e-06	8.38283e-05	0.0266169	0.0165093	0.0394682	0.0368257	0.0394682
	GJ-1 12	0.0175179	20.0091	4.41147	6.82512	7.07635	7.17078e-06	1.16412	0.220473	0.341098	0.353652	0.0581789	1.60406	8.38961e-06	1.21364e-05	2.27254e-05	3.74481e-06	7.5348e-05
	MUD 12	0.00671541	20.236	4.46153	6.90284	7.15739	1.10618e-05	1.17757	0.220474	0.341114	0.35369	0.0581908	1.60423	7.93529e-06	1.01283e-05	2.21351e-05	4.22119e-06	6.89115e-05	0.00989963	0.0502115	0.121634	0.186743	0.121634
	GJ-1 13	0.0172747	19.7142	4.34642	6.72447	6.97188	6.92964e-06	1.14701	0.220471	0.341096	0.353643	0.0581809	1.60404	9.66405e-06	1.09381e-05	2.56223e-05	3.71461e-06	7.95652e-05
	MUD 13	0.00551125	19.9926	4.40797	6.82007	7.07118	1.58768e-05	1.16337	0.220479	0.341128	0.353682	0.0581888	1.60415	8.40211e-06	1.18388e-05	2.82582e-05	4.3913e-06	9.49966e-05	0.0508577	0.076055	0.0784638	0.101559	0.0784638
	GJ-1 14	0.01725	19.6727	4.33717	6.71053	6.95766	-1.28833e-06	1.14467	0.220465	0.341107	0.353667	0.0581849	1.60418	8.40555e-06	9.6726e-06	2.09466e-05	3.77239e-06	6.64665e-05
	MUD 14	0.00537139	19.8949	4.38634	6.78639	7.03672	3.65595e-07	1.15767	0.220475	0.341109	0.353687	0.0581881	1.60421	9.3268e-06	1.30521e-05	2.71425e-05	4.44596e-06	8.74367e-05	0.0303473	0.0136388	0.0739798	0.0811944	0.0739798
	GJ-1 15	0.0172463	19.6315	4.32818	6.69637	6.94283	1.45311e-05	1.1422	0.22047	0.341102	0.353655	0.0581818	1.60409	9.68955e-06	1.22242e-05	2.41114e-05	4.03077e-06	7.11593e-05
	MUD 15	0.00550453	19.8264	4.37116	6.76312	7.01198	9.13935e-06	1.15363	0.220471	0.341114	0.353662	0.0581856	1.60412	7.22966e-06	1.31815e-05	2.63864e-05	4.35333e-06	9.71388e-05	0.00882674	0.0454716	0.0335745	0.116308	0.0335745
	GJ-1 16	0.0173542	19.7521	4.35472	6.73736	6.98533	5.33855e-07	1.14911	0.220468	0.341094	0.353646	0.0581758	1.60407	9.44763e-06	1.25361e-05	2.69533e-05	4.72307e-06	8.17878e-05
	MUD 16	0.00649181	19.9868	4.4065	6.81774	7.0689	9.96365e-06	1.163	0.22047	0.341109	0.353672	0.0581871	1.60418	9.43901e-06	1.28152e-05	2.59517e-05	4.3747e-06	7.51036e-05	0.0167062	0.0495784	0.075229	0.162474	0.075229
	GJ-1 17	0.0173208	19.7573	4.35579	6.73906	6.98715	3.04529e-06	1.14948	0.220464	0.34109	0.353645	0.0581795	1.6041	8.36951e-06	1.18659e-05	2.05395e-05	4.15826e-06	6.75001e-05
